# Supplementary material
Source: PubMed Central journal article supplement (PMC4553823)
Supplement: pnas.1502258112.sd01.pdf [file pnas.1502258112.sd01.pdf]

Table S1. Quantitative mass spectrometry results of synaptic proteome comparing Fmt1 WT and KO mouse cortex at two developing time points.

| <b>locus</b>     | <b>Gene Symbol</b> | <b>KO/WT-P17</b> | <b>KO/WT-P45</b> | <b>P value BH_P17</b> | <b>P value BH_P45</b> |
|------------------|--------------------|------------------|------------------|-----------------------|-----------------------|
| 1 IPI00341550.1  | mt-Nd1             | 1.45             | 1.09             | 0.00000               | 0.49522               |
| 2 IPI00153381.1  | Uqcr10             | 1.56             | 0.98             | 0.00000               | 0.93068               |
| 3 IPI00121309.2  | Ndufs3             | 1.64             | 1.03             | 0.00000               | 0.79353               |
| 4 IPI00108780.7  | Ap2a1              | 1.64             | 0.74             | 0.00000               | -                     |
| 5 IPI00622911.1  | Ap2a1              | 1.64             | 0.96             | 0.00000               | 0.75111               |
| 6 IPI00169925.2  | Ndufv2             | 1.69             | 1.02             | 0.00000               | 0.88667               |
| 7 IPI00311515.2  | Napb               | 1.81             | 0.99             | 0.00000               | 0.96853               |
| 8 IPI00126635.1  | Idh3b              | 1.85             | 1.02             | 0.00000               | 0.85883               |
| 9 IPI00880852.1  | Vamp2              | 1.88             | 1.01             | 0.00000               | 0.94639               |
| 10 IPI00229703.6 | Vamp2              | 1.88             | -                | 0.00000               | -                     |
| 11 IPI00119113.3 | Atp6v1b2           | 1.90             | 0.88             | 0.00000               | 0.47039               |
| 12 IPI00395134.4 | Homer1             | 1.94             | 0.78             | 0.00000               | 0.37683               |
| 13 IPI00407692.3 | Atp6v1a            | 2.06             | 0.91             | 0.00000               | 0.57391               |
| 14 IPI00122974.1 | Gpm6a              | 2.12             | 0.82             | 0.00000               | 0.45615               |
| 15 IPI00262693.4 | Acs16              | 2.20             | -                | 0.00000               | -                     |
| 16 IPI00649775.1 | Acs16              | 2.20             | 0.96             | 0.00000               | 0.76592               |
| 17 IPI00120302.1 | Lgi1               | 2.21             | 0.81             | 0.00000               | 0.59028               |
| 18 IPI00656325.2 | Nsf                | 2.25             | 0.92             | 0.00000               | 0.63407               |
| 19 IPI00129622.3 | Syt2               | 2.26             | 1.03             | 0.00000               | 0.91639               |
| 20 IPI00857092.1 | Slc4a4             | 2.27             | 0.81             | 0.00000               | 0.62095               |
| 21 IPI00458023.4 | Adam23             | 2.29             | 0.84             | 0.00000               | 0.61123               |
| 22 IPI00129175.1 | Adam23             | 2.29             | -                | 0.00000               | -                     |
| 23 IPI00648033.1 | Adam23             | 2.29             | -                | 0.00000               | -                     |
| 24 IPI00649891.2 | Adam23             | 2.29             | -                | 0.00000               | -                     |
| 25 IPI00849661.1 | LOC100046035       | 2.29             | -                | 0.00000               | -                     |
| 26 IPI00480277.1 | Adam23             | 2.29             | -                | 0.00000               | -                     |
| 27 IPI00648288.1 | Adam23             | 2.29             | -                | 0.00000               | -                     |
| 28 IPI00650001.3 | Adam23             | 2.29             | -                | 0.00000               | -                     |
| 29 IPI00458025.2 | Adam23             | 2.29             | -                | 0.00000               | -                     |
| 30 IPI00128296.1 | Ckmt1              | 2.31             | 1.08             | 0.00000               | 0.5772                |
| 31 IPI00311682.5 | Atp1a1             | 2.31             | 0.86             | 0.00000               | 0.49522               |
| 32 IPI00831180.1 | Atp2b2             | 2.32             | 0.85             | 0.00000               | 0.5772                |
| 33 IPI00127713.1 | Atp2b2             | 2.32             | -                | 0.00000               | -                     |
| 34 IPI00283761.1 | Sfxn5              | 2.33             | 1.24             | 0.00000               | 0.42216               |
| 35 IPI00221602.1 | Sfxn5              | 2.33             | 1.24             | 0.00000               | -                     |
| 36 IPI00225389.1 | Snap25             | 2.44             | 0.90             | 0.00000               | 0.7355                |
| 37 IPI00407499.1 | Abat               | 2.54             | 0.99             | 0.00000               | 0.93586               |
| 38 IPI00309953.4 | Stxbp5l            | 2.55             | -                | 0.00000               | -                     |
| 39 IPI00555114.1 | Stxbp5l            | 2.55             | -                | 0.00000               | -                     |
| 40 IPI00656281.1 | Stxbp5l            | 2.55             | -                | 0.00000               | -                     |
| 41 IPI00555072.1 | Stxbp5l            | 2.55             | 0.73             | 0.00000               | 0.35843               |
| 42 IPI00125635.1 | Snap25             | 2.56             | 0.90             | 0.00000               | 0.70345               |
| 43 IPI00876489.1 | Sirpa              | 2.60             | 0.88             | 0.00000               | 0.7202                |
| 44 IPI00626790.3 | Glul               | 2.64             | 0.93             | 0.00000               | 0.73565               |
| 45 IPI00134492.4 | Syn2               | 2.67             | 0.99             | 0.00000               | 0.97631               |
| 46 IPI00129618.1 | Syt1               | 2.70             | -                | 0.00000               | -                     |
| 47 IPI00121349.3 | Ppp1r1b            | 2.79             | 0.82             | 0.00000               | 0.57795               |
| 48 IPI00877205.1 | Got1               | 2.83             | 0.91             | 0.00000               | 0.62995               |
| 49 IPI00331704.7 | Eno2               | 2.83             | 0.90             | 0.00000               | 0.62108               |

|     |               |               |      |      |         |         |
|-----|---------------|---------------|------|------|---------|---------|
| 50  | IPI00122094.2 | Dlg4          | 3.00 | -    | 0.00000 | -       |
| 51  | IPI00621806.2 | Camk2a        | 3.00 | 0.75 | 0.00000 | 0.3547  |
| 52  | IPI00622720.1 | Dlg4          | 3.00 | 0.72 | 0.00000 | 0.35843 |
| 53  | IPI00626797.1 | Dlg4          | 3.00 | -    | 0.00000 | -       |
| 54  | IPI00817008.1 | Rgs7bp        | 3.15 | 0.77 | 0.00000 | 0.37683 |
| 55  | IPI00109727.1 | Thy1          | 3.22 | 0.81 | 0.00000 | 0.37683 |
| 56  | IPI00831055.2 | Hbb-b1        | 3.40 | 1.33 | 0.00000 | 0.35843 |
| 57  | IPI00845802.1 | Hba-a1;Hba-a2 | 3.40 | 1.37 | 0.00000 | 0.35843 |
| 58  | IPI00110658.1 | Hba-a1;Hba-a2 | 3.40 | -    | 0.00000 | -       |
| 59  | IPI00663736.2 | Syngap1       | 3.41 | 0.73 | 0.00000 | 0.35843 |
| 60  | IPI00230151.1 | Mag           | 3.43 | 0.74 | 0.00000 | -       |
| 61  | IPI00276515.4 | Mag           | 3.43 | 0.69 | 0.00000 | 0.3547  |
| 62  | IPI00134093.4 | Bsn           | 3.57 | 0.75 | 0.00000 | -       |
| 63  | IPI00751005.2 | 8-Sep         | 3.71 | 0.85 | 0.00000 | 0.48356 |
| 64  | IPI00875717.2 | 8-Sep         | 3.71 | -    | 0.00000 | -       |
| 65  | IPI00880314.1 | 8-Sep         | 3.71 | -    | 0.00000 | -       |
| 66  | IPI00331497.9 | 8-Sep         | 3.71 | -    | 0.00000 | -       |
| 67  | IPI00119067.3 | Tppp          | 3.80 | 0.92 | 0.00000 | 0.3937  |
| 68  | IPI00415558.1 | Synpo         | 4.00 | 0.97 | 0.00000 | 0.8793  |
| 69  | IPI00664176.1 | Anks1b        | 4.35 | 0.83 | 0.00000 | 0.35843 |
| 70  | IPI00927975.1 | Pfkp          | 4.52 | 0.88 | 0.00000 | 0.49522 |
| 71  | IPI00124444.1 | Pfkp          | 4.52 | -    | 0.00000 | -       |
| 72  | IPI00749872.1 | Slc1a2        | 4.67 | -    | 0.00000 | -       |
| 73  | IPI00230290.1 | Slc1a2        | 4.67 | -    | 0.00000 | -       |
| 74  | IPI00230289.1 | Slc1a2        | 4.92 | 1.00 | 0.00000 | -       |
| 75  | IPI00875419.1 | Slc1a2        | 4.92 | -    | 0.00000 | -       |
| 76  | IPI00470184.2 | Slc1a2        | 4.92 | 0.87 | 0.00000 | -       |
| 77  | IPI00896700.1 | Mtap1b        | 0.28 | 0.97 | 0.00027 | 0.7202  |
| 78  | IPI00761613.1 | Rac1          | 1.37 | 0.84 | 0.00027 | 0.38012 |
| 79  | IPI00929850.1 | Pgm2;Pgm1     | 1.45 | 1.00 | 0.00027 | 0.9526  |
| 80  | IPI00555140.2 | Pgm2;Pgm1     | 1.45 | -    | 0.00027 | -       |
| 81  | IPI00828649.1 | Dnajc11       | 1.46 | 1.04 | 0.00027 | 0.76381 |
| 82  | IPI00226466.6 | Dnajc11       | 1.46 | -    | 0.00027 | -       |
| 83  | IPI00670114.1 | Cadps         | 1.61 | 0.90 | 0.00027 | 0.37683 |
| 84  | IPI00117978.1 | Cox4i1        | 1.65 | 1.06 | 0.00027 | 0.45615 |
| 85  | IPI00131618.1 | Stx1a         | 1.66 | 1.00 | 0.00027 | 0.93022 |
| 86  | IPI00459725.2 | Idh3a         | 1.67 | 1.01 | 0.00027 | 0.94077 |
| 87  | IPI00626237.2 | Ogdh          | 1.68 | 1.12 | 0.00027 | 0.33373 |
| 88  | IPI00403336.4 | Opa1          | 1.70 | 0.99 | 0.00027 | 0.89437 |
| 89  | IPI00117657.2 | Opa1          | 1.70 | -    | 0.00027 | -       |
| 90  | IPI00676211.4 | Psd3          | 1.79 | 0.96 | 0.00027 | 0.88818 |
| 91  | IPI00762858.1 | Hk1           | 1.80 | 1.07 | 0.00027 | 0.47039 |
| 92  | IPI00136703.1 | Ckb           | 1.87 | 0.90 | 0.00027 | 0.47039 |
| 93  | IPI00923056.1 |               | 1.87 | 0.99 | 0.00027 | 0.96001 |
| 94  | IPI00649886.1 | Syn1          | 1.90 | 1.00 | 0.00027 | 0.9526  |
| 95  | IPI00228526.3 | Atp6v0a1      | 1.93 | 0.90 | 0.00027 | 0.60692 |
| 96  | IPI00228525.2 | Atp6v0a1      | 1.93 | -    | 0.00027 | -       |
| 97  | IPI00121550.3 | Atp1b1        | 1.94 | 0.86 | 0.00027 | 0.63129 |
| 98  | IPI00649467.3 | Syn1          | 1.98 | -    | 0.00027 | -       |
| 99  | IPI00761443.2 | Iqsec1        | 2.06 | -    | 0.00027 | -       |
| 100 | IPI00115607.3 | Hadhb         | 2.13 | -    | 0.00027 | -       |
| 101 | IPI00474281.1 | Gm13910       | 2.13 | 1.13 | 0.00027 | 0.37683 |

|     |                |                 |      |      |         |         |
|-----|----------------|-----------------|------|------|---------|---------|
| 102 | IPI00648567.1  | Sh3gl2          | 2.13 | 0.91 | 0.00027 | 0.5209  |
| 103 | IPI00109275.1  | Slc25a22        | 2.18 | 1.13 | 0.00027 | 0.38012 |
| 104 | IPI00228633.7  | Gpi1            | 2.18 | 0.95 | 0.00027 | 0.85883 |
| 105 | IPI00123390.8  | Acs16           | 2.24 | -    | 0.00027 | -       |
| 106 | IPI00625955.1  | Acs16           | 2.24 | 1.01 | 0.00027 | 0.94638 |
| 107 | IPI00553820.1  | Acs16           | 2.24 | -    | 0.00027 | -       |
| 108 | IPI00121534.11 | Car2            | 2.25 | 0.74 | 0.00027 | 0.33373 |
| 109 | IPI00221402.7  | Aldoa           | 2.26 | -    | 0.00027 | -       |
| 110 | IPI00380273.1  | Gja1            | 2.57 | 0.72 | 0.00027 | 0.35843 |
| 111 | IPI00226727.4  | Dlg2            | 2.63 | 0.83 | 0.00027 | 0.3937  |
| 112 | IPI00750142.1  | Syt1            | 2.70 | 0.83 | 0.00027 | 0.45615 |
| 113 | IPI00674640.1  | Dlg1;LOC100047€ | 3.10 | 0.92 | 0.00027 | 0.49522 |
| 114 | IPI00124778.1  | Baiap2          | 3.23 | -    | 0.00027 | -       |
| 115 | IPI00649474.1  | Baiap2          | 3.23 | -    | 0.00027 | -       |
| 116 | IPI00222731.2  | Baiap2          | 3.23 | 0.82 | 0.00027 | 0.31297 |
| 117 | IPI00648827.1  | Baiap2          | 3.23 | -    | 0.00027 | -       |
| 118 | IPI00461199.2  | Bsn             | 3.52 | 0.70 | 0.00027 | 0.33373 |
| 119 | IPI00877299.1  | Icam5           | 4.57 | 0.82 | 0.00027 | 0.47605 |
| 120 | IPI00854028.2  | Cntnap1         | 5.27 | 0.85 | 0.00027 | 0.37683 |
| 121 | IPI00113223.2  | Fasn            | 0.47 | 0.85 | 0.00042 | 0.53578 |
| 122 | IPI00127408.3  | Rac1            | 1.39 | -    | 0.00042 | -       |
| 123 | IPI00876084.1  | Gpd2            | 1.51 | 1.06 | 0.00042 | 0.62095 |
| 124 | IPI00130280.1  | Atp5a1          | 1.51 | 1.08 | 0.00042 | 0.37683 |
| 125 | IPI00126115.1  | Sfxn3           | 1.55 | 1.05 | 0.00042 | 0.70155 |
| 126 | IPI00119663.3  | Mapk1           | 1.61 | 1.07 | 0.00042 | 0.64484 |
| 127 | IPI00848729.1  | LOC100047509;G  | 1.62 | 0.76 | 0.00042 | 0.82671 |
| 128 | IPI00124292.1  | Brp44l          | 1.62 | -    | 0.00042 | -       |
| 129 | IPI00225390.5  | Cox6b1          | 1.62 | 1.00 | 0.00042 | 0.98135 |
| 130 | IPI00116748.1  | Ndufa10         | 1.62 | 1.06 | 0.00042 | 0.35843 |
| 131 | IPI00480558.4  | Pcmt1           | 1.68 | 0.93 | 0.00042 | 0.68311 |
| 132 | IPI00329913.9  | Pcmt1           | 1.68 | -    | 0.00042 | -       |
| 133 | IPI00283611.1  | Hk1             | 1.75 | -    | 0.00042 | -       |
| 134 | IPI00928559.1  | Hk1             | 1.75 | 1.11 | 0.00042 | -       |
| 135 | IPI00759938.1  | Hk1             | 1.75 | -    | 0.00042 | -       |
| 136 | IPI00342603.7  | Ogdhl           | 1.75 | 1.07 | 0.00042 | 0.35843 |
| 137 | IPI00226140.5  | Maob            | 1.92 | -    | 0.00042 | -       |
| 138 | IPI00944790.1  | Maob            | 1.92 | 0.92 | 0.00042 | 0.50346 |
| 139 | IPI00131771.3  | Cox6c           | 1.94 | -    | 0.00042 | -       |
| 140 | IPI00622837.1  | Gm6265          | 1.94 | 1.10 | 0.00042 | 0.6116  |
| 141 | IPI00119115.2  | Atp6v1e1        | 2.02 | 0.87 | 0.00042 | 0.35843 |
| 142 | IPI00331110.3  | Sh3gl2          | 2.03 | -    | 0.00042 | -       |
| 143 | IPI00133284.1  | D10Jhu81e;LOC10 | 2.05 | 1.01 | 0.00042 | 0.97404 |
| 144 | IPI00465810.3  | Sv2a            | 2.06 | 0.86 | 0.00042 | 0.53084 |
| 145 | IPI00676243.2  | Mtap1a          | 2.07 | 0.99 | 0.00042 | 0.97709 |
| 146 | IPI00408909.4  | Mtap1a          | 2.07 | -    | 0.00042 | -       |
| 147 | IPI00170310.1  | Slc8a2          | 2.18 | 0.89 | 0.00042 | 0.62095 |
| 148 | IPI00876255.1  | Nsf             | 2.25 | 0.99 | 0.00042 | 0.97749 |
| 149 | IPI00465769.3  | Slc12a5         | 2.33 | -    | 0.00042 | -       |
| 150 | IPI00877254.1  | Slc12a5         | 2.33 | 0.88 | 0.00042 | 0.62929 |
| 151 | IPI00121545.1  | Ppp3ca          | 2.36 | 0.94 | 0.00042 | 0.71119 |
| 152 | IPI00122965.1  | Rab3a           | 2.37 | 0.92 | 0.00042 | 0.53088 |
| 153 | IPI00928138.1  | 8-Sep           | 3.71 | -    | 0.00042 | -       |

|     |                |              |      |      |         |         |
|-----|----------------|--------------|------|------|---------|---------|
| 154 | IPI00137409.3  | Tkt          | 0.74 | 0.89 | 0.00055 | 0.49522 |
| 155 | IPI00331332.6  | Ndufa5       | 1.50 | 1.03 | 0.00055 | 0.8586  |
| 156 | IPI00115564.5  | Slc25a4      | 1.53 | 1.09 | 0.00055 | 0.51088 |
| 157 | IPI00337893.2  | Pdha1        | 1.56 | 1.10 | 0.00055 | 0.37683 |
| 158 | IPI00344004.3  | Ndufa12      | 1.58 | 1.00 | 0.00055 | 0.98971 |
| 159 | IPI00944067.1  | Ndufa9       | 1.62 | 0.99 | 0.00055 | 0.93022 |
| 160 | IPI00136134.1  | Ndrp2        | 1.81 | 0.85 | 0.00055 | 0.73026 |
| 161 | IPI00759847.1  | Ndrp2        | 1.81 | 0.90 | 0.00055 | -       |
| 162 | IPI00880742.1  | Dpp6         | 2.07 | -    | 0.00055 | -       |
| 163 | IPI00336324.11 | Mdh1         | 2.15 | 0.97 | 0.00055 | 0.88818 |
| 164 | IPI00380436.1  | Actn1        | 2.17 | 0.93 | 0.00055 | 0.63926 |
| 165 | IPI00756529.1  | Arfgap1      | 2.23 | -    | 0.00055 | -       |
| 166 | IPI00387227.1  | Arfgap1      | 2.23 | -    | 0.00055 | -       |
| 167 | IPI00403723.3  | Arfgap1      | 2.23 | 1.10 | 0.00055 | 0.47487 |
| 168 | IPI00119458.7  | Aldoc        | 2.24 | 0.93 | 0.00055 | 0.7676  |
| 169 | IPI00856379.1  | Aldoa        | 2.26 | 0.99 | 0.00055 | 0.91146 |
| 170 | IPI00227898.3  | Prkcb        | 2.32 | 0.88 | 0.00055 | 0.6252  |
| 171 | IPI00606892.5  | Wipf3        | 2.43 | -    | 0.00055 | -       |
| 172 | IPI00849730.2  | Wipf3        | 2.43 | 0.84 | 0.00055 | -       |
| 173 | IPI00230204.7  | Got1         | 2.48 | -    | 0.00055 | -       |
| 174 | IPI00227035.2  | Snph         | 2.95 | 0.99 | 0.00055 | -       |
| 175 | IPI00850112.1  | Synpo        | 3.89 | -    | 0.00055 | -       |
| 176 | IPI00662157.3  | Synpo        | 3.89 | 0.93 | 0.00055 | -       |
| 177 | IPI00608063.3  | Ptprd        | 1.43 | -    | 0.00066 | -       |
| 178 | IPI00273164.1  | Aldh5a1      | 1.54 | 1.01 | 0.00066 | 0.90591 |
| 179 | IPI00230351.1  | Sdha         | 1.56 | 1.07 | 0.00066 | 0.66208 |
| 180 | IPI00857911.1  | Opcml        | 1.57 | 1.07 | 0.00066 | 0.87147 |
| 181 | IPI00668903.1  | Cadps        | 1.61 | -    | 0.00066 | -       |
| 182 | IPI00928416.1  | Ndufv1       | 1.73 | 1.01 | 0.00066 | 0.8044  |
| 183 | IPI00130460.1  | Ndufv1       | 1.73 | 1.02 | 0.00066 | -       |
| 184 | IPI00850740.1  | LOC100044138 | 1.84 | 1.00 | 0.00066 | 0.97749 |
| 185 | IPI00850539.1  | LOC100044138 | 1.84 | -    | 0.00066 | -       |
| 186 | IPI00416280.3  | 5-Sep        | 1.84 | -    | 0.00066 | -       |
| 187 | IPI00122048.2  | Atp1a3       | 1.89 | 0.81 | 0.00066 | 0.38012 |
| 188 | IPI00331299.9  | Ncdn         | 1.90 | -    | 0.00066 | -       |
| 189 | IPI00889265.1  | Ncdn         | 1.90 | 0.90 | 0.00066 | 0.51134 |
| 190 | IPI00331541.5  | Pfkm         | 1.92 | 0.83 | 0.00066 | 0.38012 |
| 191 | IPI00118787.1  | Atp6v1d      | 1.96 | 0.92 | 0.00066 | 0.65135 |
| 192 | IPI00134191.3  | Slc2a3       | 2.45 | 0.92 | 0.00066 | 0.50578 |
| 193 | IPI00459465.1  | Baiap2       | 2.88 | -    | 0.00066 | -       |
| 194 | IPI00555000.2  | Uqcrb        | 1.49 | 1.14 | 0.00073 | 0.35616 |
| 195 | IPI00132347.1  | Uqcrb        | 1.49 | -    | 0.00073 | -       |
| 196 | IPI00131176.1  | mt-Co2       | 1.61 | 0.97 | 0.00073 | 0.76381 |
| 197 | IPI00120719.4  | Cox5a        | 1.62 | 1.02 | 0.00073 | 0.85039 |
| 198 | IPI00457898.3  | Pgam1        | 1.69 | 0.94 | 0.00073 | 0.70614 |
| 199 | IPI00850833.1  | Cadm2        | 1.74 | -    | 0.00073 | -       |
| 200 | IPI00850457.1  | Cadm2        | 1.74 | 0.83 | 0.00073 | 0.39388 |
| 201 | IPI00453537.2  | Cadm2        | 1.74 | -    | 0.00073 | -       |
| 202 | IPI00874653.1  | Cadm2        | 1.74 | -    | 0.00073 | -       |
| 203 | IPI00896744.1  | Dmnl2        | 1.78 | 0.82 | 0.00073 | 0.38642 |
| 204 | IPI00853932.1  | Dmnl2        | 1.78 | 0.88 | 0.00073 | -       |
| 205 | IPI00874973.1  | Psd3         | 1.79 | -    | 0.00073 | -       |

|     |               |                |      |      |         |         |
|-----|---------------|----------------|------|------|---------|---------|
| 206 | IPI00875485.1 | Psd3           | 1.79 | -    | 0.00073 | -       |
| 207 | IPI00875877.1 | Cd47           | 1.81 | -    | 0.00073 | -       |
| 208 | IPI00124830.3 | Cd47           | 1.81 | -    | 0.00073 | -       |
| 209 | IPI00403079.4 | Cd47           | 1.81 | 0.84 | 0.00073 | 0.4633  |
| 210 | IPI00313841.1 | Atp6v0d1       | 1.82 | 0.94 | 0.00073 | 0.66881 |
| 211 | IPI00762623.1 | Pde2a          | 1.84 | 0.92 | 0.00073 | -       |
| 212 | IPI00875107.1 | Prnd           | 2.19 | 0.89 | 0.00073 | 0.7355  |
| 213 | IPI00120793.1 | Prnp           | 2.19 | -    | 0.00073 | -       |
| 214 | IPI00125147.4 | Mpp2           | 2.67 | -    | 0.00073 | -       |
| 215 | IPI00756238.2 | Mpp2           | 2.67 | 0.86 | 0.00073 | 0.5772  |
| 216 | IPI00135659.2 | Omg            | 2.88 | 1.00 | 0.00073 | 0.98055 |
| 217 | IPI00318522.3 | Gad2           | 3.42 | 0.94 | 0.00073 | 0.78833 |
| 218 | IPI00338983.3 | Cntnap1        | 5.09 | -    | 0.00073 | -       |
| 219 | IPI00116277.3 | Cct4           | 0.61 | 0.91 | 0.00082 | 0.58714 |
| 220 | IPI00118020.1 | Cadm3          | 1.41 | -    | 0.00082 | -       |
| 221 | IPI00230507.5 | Atp5h          | 1.44 | -    | 0.00082 | -       |
| 222 | IPI00623553.1 | LOC100044492;G | 1.44 | 1.03 | 0.00082 | 0.74902 |
| 223 | IPI00894588.1 | Acadl          | 1.48 | 0.97 | 0.00082 | 0.84174 |
| 224 | IPI00890322.1 | Bdh1           | 1.52 | 1.14 | 0.00082 | 0.3937  |
| 225 | IPI00121443.1 | Cox6a1         | 1.60 | 0.97 | 0.00082 | 0.90591 |
| 226 | IPI00116074.1 | Aco2           | 1.61 | 1.01 | 0.00082 | 0.96001 |
| 227 | IPI00128155.2 | Ctbp1          | 1.71 | -    | 0.00082 | -       |
| 228 | IPI00845557.1 | Ctbp1          | 1.71 | 0.90 | 0.00082 | 0.58965 |
| 229 | IPI00355248.5 | mt-Co1         | 1.73 | 1.00 | 0.00082 | 0.97749 |
| 230 | IPI00120212.1 | Ndufa9         | 1.73 | -    | 0.00082 | -       |
| 231 | IPI00929916.1 | Tnr            | 1.88 | 0.95 | 0.00082 | 0.73026 |
| 232 | IPI00227126.1 | Tnr            | 1.88 | -    | 0.00082 | -       |
| 233 | IPI00850941.1 |                | 2.13 | -    | 0.00082 | -       |
| 234 | IPI00130186.4 | Atp6v1c1       | 2.24 | 0.91 | 0.00082 | 0.62603 |
| 235 | IPI00672505.1 | LOC100047603;D | 3.00 | 0.87 | 0.00082 | 0.60578 |
| 236 | IPI00757109.2 | Pcmt1          | 1.65 | -    | 0.00094 | -       |
| 237 | IPI00407352.4 | Psd3           | 1.83 | -    | 0.00094 | -       |
| 238 | IPI00756786.1 | Sh3glb2        | 2.04 | -    | 0.00094 | -       |
| 239 | IPI00132042.1 | Pdhb           | 1.46 | 1.06 | 0.00105 | 0.61123 |
| 240 | IPI00132623.3 | Ndufb9         | 1.64 | 0.98 | 0.00105 | 0.90196 |
| 241 | IPI00223092.5 | Hadha          | 1.70 | 1.08 | 0.00105 | 0.42933 |
| 242 | IPI00762507.2 | Iqsec1         | 2.03 | 0.84 | 0.00105 | 0.37683 |
| 243 | IPI00229510.5 | Ldhb           | 2.45 | 0.94 | 0.00105 | 0.8044  |
| 244 | IPI00114279.1 | Slc1a3         | 1.69 | 0.86 | 0.00117 | 0.54447 |
| 245 | IPI00467833.6 | Tpi1           | 1.83 | 0.90 | 0.00117 | 0.47039 |
| 246 | IPI00911135.1 | Oxr1           | 2.26 | 0.86 | 0.00117 | 0.3547  |
| 247 | IPI00119033.1 | Icam5          | 4.71 | -    | 0.00117 | -       |
| 248 | IPI00229008.2 | Ndufs4         | 1.59 | 1.03 | 0.00126 | 0.62763 |
| 249 | IPI00118769.2 | Rgs7           | 1.96 | 0.92 | 0.00126 | -       |
| 250 | IPI00132874.4 | Mgll           | 3.71 | -    | 0.00126 | -       |
| 251 | IPI00953761.1 | Mgll           | 3.71 | -    | 0.00126 | -       |
| 252 | IPI00953776.1 | Mgll           | 3.71 | -    | 0.00126 | -       |
| 253 | IPI00858047.1 | Mgll           | 3.71 | 1.08 | 0.00126 | 0.61501 |
| 254 | IPI00110265.1 | Sirt2          | 1.47 | -    | 0.00132 | -       |
| 255 | IPI00473688.1 | Sirt2          | 1.47 | 0.89 | 0.00132 | 0.69855 |
| 256 | IPI00109109.1 | Sod2           | 1.85 | 0.95 | 0.00132 | 0.70477 |
| 257 | IPI00850983.3 | Synj1          | 2.03 | -    | 0.00132 | -       |

|     |               |                |      |      |         |         |
|-----|---------------|----------------|------|------|---------|---------|
| 258 | IPI00881540.3 | Synj1          | 2.03 | 0.89 | 0.00132 | 0.50968 |
| 259 | IPI00875695.1 | Lrrc7          | 2.09 | 0.70 | 0.00132 | 0.35843 |
| 260 | IPI00123704.1 | Atp1b2         | 2.16 | 0.86 | 0.00132 | 0.5982  |
| 261 | IPI00853761.1 | LOC100046684   | 2.18 | 1.03 | 0.00132 | -       |
| 262 | IPI00227302.6 | Slc4a10        | 2.55 | -    | 0.00132 | -       |
| 263 | IPI00752501.2 | Slc4a10        | 2.55 | 1.21 | 0.00132 | -       |
| 264 | IPI00555118.4 | Slc4a10        | 2.55 | 0.89 | 0.00132 | -       |
| 265 | IPI00331066.6 | Calb1          | 3.20 | 0.92 | 0.00132 | 0.73026 |
| 266 | IPI00122069.1 | Prkcc          | 3.70 | 0.94 | 0.00132 | 0.65939 |
| 267 | IPI00407130.4 | Pkm2           | 1.50 | 0.87 | 0.00139 | 0.47813 |
| 268 | IPI00387430.1 | Ndufb8         | 1.63 | 1.05 | 0.00139 | 0.53754 |
| 269 | IPI00415402.3 | Stxbp1         | 1.68 | 0.89 | 0.00139 | 0.49522 |
| 270 | IPI00330163.4 | Cadps          | 1.69 | 0.88 | 0.00139 | 0.49522 |
| 271 | IPI00322617.1 | Ncam2          | 1.74 | 0.96 | 0.00139 | 0.71877 |
| 272 | IPI00127556.1 | Ncam2          | 1.74 | -    | 0.00139 | -       |
| 273 | IPI00758024.1 | Prdx6          | 1.81 | 0.94 | 0.00139 | 0.73963 |
| 274 | IPI00881789.1 | Psd3           | 1.85 | -    | 0.00139 | -       |
| 275 | IPI00620507.2 | Psd3           | 1.85 | -    | 0.00139 | -       |
| 276 | IPI00816974.1 | Dgkb           | 3.39 | 0.97 | 0.00139 | 0.89697 |
| 277 | IPI00421000.2 | Dgkb           | 3.39 | -    | 0.00139 | -       |
| 278 | IPI00222419.5 | Gm10053;Cycs   | 1.57 | -    | 0.00145 | -       |
| 279 | IPI00462072.3 | Eno1;LOC100044 | 1.68 | 0.91 | 0.00145 | 0.58951 |
| 280 | IPI00850430.1 | LOC100046151   | 1.88 | 1.04 | 0.00145 | 0.90942 |
| 281 | IPI00315999.4 | Atp6v1f        | 1.90 | 0.85 | 0.00145 | 0.37683 |
| 282 | IPI00858128.1 | Camk2d         | 2.00 | 0.64 | 0.00145 | -       |
| 283 | IPI00807733.1 | Arfgap1        | 2.30 | -    | 0.00145 | -       |
| 284 | IPI00123613.1 | Pacsin1        | 2.89 | 0.93 | 0.00145 | 0.71119 |
| 285 | IPI00331293.3 | Dnm1           | 3.06 | 0.87 | 0.00145 | 0.35843 |
| 286 | IPI00465871.1 | Gpr158         | 5.69 | 0.79 | 0.00145 | 0.51296 |
| 287 | IPI00109169.1 | Idh3g          | 1.57 | 1.06 | 0.00153 | 0.72116 |
| 288 | IPI00894705.1 | Mfn2           | 1.59 | -    | 0.00153 | -       |
| 289 | IPI00312244.3 | Mfn2           | 1.59 | -    | 0.00153 | -       |
| 290 | IPI00816883.1 | LOC100044767   | 1.59 | 1.16 | 0.00153 | 0.37683 |
| 291 | IPI00889824.1 | Srcin1         | 1.88 | 0.68 | 0.00153 | -       |
| 292 | IPI00757771.1 | Nptn           | 2.15 | 0.81 | 0.00153 | 0.38642 |
| 293 | IPI00653598.2 | Uqcrc1         | 1.44 | 1.04 | 0.00163 | 0.54506 |
| 294 | IPI00132390.5 | Ndufb4;Gm3244; | 1.56 | 1.18 | 0.00163 | 0.47039 |
| 295 | IPI00318645.6 | Ndufa11        | 1.88 | 0.99 | 0.00163 | 0.9111  |
| 296 | IPI00556869.1 | Ptprd          | 1.45 | 0.67 | 0.00170 | -       |
| 297 | IPI00465836.4 | Ptprd          | 1.45 | -    | 0.00170 | -       |
| 298 | IPI00114209.1 | Glud1          | 1.57 | 0.99 | 0.00170 | 0.86815 |
| 299 | IPI00131720.3 | Cacnb4         | 2.27 | -    | 0.00170 | -       |
| 300 | IPI00473235.1 | Cacnb4         | 2.27 | 0.91 | 0.00170 | 0.78676 |
| 301 | IPI00626660.3 | Cacnb4         | 2.27 | -    | 0.00170 | -       |
| 302 | IPI00555069.3 | Pgk1           | 1.68 | 0.90 | 0.00178 | 0.54327 |
| 303 | IPI00130376.1 | mt-Co1         | 1.78 | -    | 0.00178 | -       |
| 304 | IPI00458612.5 | Aak1           | 2.01 | 0.87 | 0.00178 | 0.35843 |
| 305 | IPI00221788.3 | Hpcal4         | 2.65 | 1.09 | 0.00178 | 0.83335 |
| 306 | IPI00856781.1 | Negr1          | 1.61 | -    | 0.00197 | -       |
| 307 | IPI00467747.2 | Negr1          | 1.61 | 0.88 | 0.00197 | 0.61644 |
| 308 | IPI00330887.1 | Negr1          | 1.61 | -    | 0.00197 | -       |
| 309 | IPI00831191.1 | Pde10a         | 1.67 | -    | 0.00200 | -       |

|     |               |                 |      |      |         |         |
|-----|---------------|-----------------|------|------|---------|---------|
| 310 | IPI00830614.1 | Pde10a          | 1.67 | -    | 0.00200 | -       |
| 311 | IPI00468960.1 | Pde10a          | 1.67 | -    | 0.00200 | -       |
| 312 | IPI00831080.1 | Pde10a          | 1.67 | -    | 0.00200 | -       |
| 313 | IPI00621783.2 | Pde10a          | 1.67 | 0.76 | 0.00200 | 0.42933 |
| 314 | IPI00125460.1 | Atp5j;LOC674583 | 1.68 | 1.06 | 0.00200 | 0.39388 |
| 315 | IPI00319970.1 | Cacna2d1        | 1.72 | 0.85 | 0.00200 | 0.47039 |
| 316 | IPI00410904.1 | Kcnma1          | 2.50 | -    | 0.00200 | -       |
| 317 | IPI00410903.3 | Kcnma1          | 2.50 | -    | 0.00200 | -       |
| 318 | IPI00120643.1 | Kcnma1          | 2.50 | -    | 0.00200 | -       |
| 319 | IPI00410901.1 | Kcnma1          | 2.50 | 0.69 | 0.00200 | 0.5524  |
| 320 | IPI00410905.2 | Kcnma1          | 2.50 | 0.92 | 0.00200 | -       |
| 321 | IPI00127841.3 | Slc25a5         | 1.47 | 1.07 | 0.00205 | 0.63407 |
| 322 | IPI00346965.5 | Ap1b1           | 1.51 | -    | 0.00205 | -       |
| 323 | IPI00620728.2 | Gdap1l1         | 1.52 | 1.02 | 0.00205 | 0.84603 |
| 324 | IPI00123756.1 | Gdap1l1         | 1.52 | -    | 0.00205 | -       |
| 325 | IPI00224626.3 | 7-Sep           | 1.72 | -    | 0.00205 | -       |
| 326 | IPI00311461.1 | Atp6v1h         | 1.85 | 0.88 | 0.00205 | 0.39388 |
| 327 | IPI00627029.1 | Rgs7            | 2.02 | 0.89 | 0.00205 | 0.51846 |
| 328 | IPI00875257.1 | Rgs7            | 2.02 | -    | 0.00205 | -       |
| 329 | IPI00307837.6 | Eef1a1          | 0.54 | 1.05 | 0.00210 | 0.57476 |
| 330 | IPI00129928.2 | Fh1             | 1.47 | -    | 0.00210 | -       |
| 331 | IPI00850053.1 | LOC100045547    | 1.60 | 0.84 | 0.00210 | 0.35843 |
| 332 | IPI00310764.7 | Arhgef2         | 1.84 | 1.25 | 0.00210 | -       |
| 333 | IPI00900401.1 | Arhgef2         | 1.84 | 1.19 | 0.00210 | 0.59034 |
| 334 | IPI00900466.1 | Arhgef2         | 1.84 | 1.09 | 0.00210 | -       |
| 335 | IPI00469987.3 | Gda             | 2.04 | 0.91 | 0.00210 | 0.53638 |
| 336 | IPI00262198.6 | Mcart1          | 1.39 | 0.99 | 0.00216 | 0.94207 |
| 337 | IPI00330290.1 | Epb4.1l2        | 2.96 | -    | 0.00216 | -       |
| 338 | IPI00402933.1 | Epb4.1l2        | 2.96 | -    | 0.00216 | -       |
| 339 | IPI00330289.3 | Epb4.1l2        | 2.96 | 0.96 | 0.00216 | 0.79297 |
| 340 | IPI00309481.1 | Epb4.1l2        | 2.96 | -    | 0.00216 | -       |
| 341 | IPI00403406.1 | Epb4.1l2        | 2.96 | -    | 0.00216 | -       |
| 342 | IPI00911164.1 | Hras1           | 1.26 | 0.91 | 0.00219 | -       |
| 343 | IPI00775965.1 | Nras            | 1.26 | 0.84 | 0.00219 | -       |
| 344 | IPI00315334.5 | Nras            | 1.26 | -    | 0.00219 | -       |
| 345 | IPI00403929.4 | Hras1           | 1.26 | 1.00 | 0.00219 | 1       |
| 346 | IPI00749677.3 | Dnm2            | 1.41 | 0.92 | 0.00219 | 0.47166 |
| 347 | IPI00876285.1 | Ptprd           | 1.44 | -    | 0.00219 | -       |
| 348 | IPI00556827.1 | Atp2b1          | 1.58 | 0.85 | 0.00219 | 0.53529 |
| 349 | IPI00405736.3 | Cd81            | 1.78 | 0.74 | 0.00219 | 0.62627 |
| 350 | IPI00131614.1 | Sncb            | 2.00 | 1.03 | 0.00219 | 0.74437 |
| 351 | IPI00857780.1 | Cadm3           | 1.41 | 0.69 | 0.00223 | 0.35843 |
| 352 | IPI00930784.1 | Ndufs1          | 1.60 | 1.04 | 0.00223 | 0.62095 |
| 353 | IPI00338536.1 | Sdhb            | 1.67 | 1.09 | 0.00223 | 0.54506 |
| 354 | IPI00135446.1 | Gyk             | 1.89 | -    | 0.00223 | -       |
| 355 | IPI00654090.2 | Gyk             | 1.89 | -    | 0.00223 | -       |
| 356 | IPI00224993.4 | Gyk             | 1.89 | 1.17 | 0.00223 | 0.60578 |
| 357 | IPI00404687.5 | Gyk             | 1.89 | -    | 0.00223 | -       |
| 358 | IPI00406790.6 | Camk2d          | 2.07 | 0.90 | 0.00223 | -       |
| 359 | IPI00118900.1 | Pde1b           | 2.58 | 0.77 | 0.00223 | 0.35616 |
| 360 | IPI00894724.1 | Mtap2           | 1.50 | 1.10 | 0.00228 | 0.54845 |
| 361 | IPI00341282.2 | Atp5f1          | 1.57 | 1.16 | 0.00228 | 0.53529 |

|     |               |                      |      |      |         |         |
|-----|---------------|----------------------|------|------|---------|---------|
| 362 | IPI00114377.1 | Cox7a2               | 1.58 | 1.17 | 0.00228 | 0.35843 |
| 363 | IPI00381412.1 | Immt                 | 1.60 | 1.03 | 0.00228 | 0.73026 |
| 364 | IPI00876075.1 | Nrcam                | 1.61 | 0.80 | 0.00228 | -       |
| 365 | IPI00415403.1 | Stxbp1               | 1.68 | 0.90 | 0.00230 | 0.50515 |
| 366 | IPI00752192.1 | Pclo                 | 1.73 | -    | 0.00230 | -       |
| 367 | IPI00380997.3 | Wdr7                 | 1.74 | -    | 0.00230 | -       |
| 368 | IPI00120637.4 | Wdr7                 | 1.74 | -    | 0.00230 | -       |
| 369 | IPI00225140.5 | Pclo                 | 1.76 | 0.51 | 0.00230 | -       |
| 370 | IPI00944107.1 | Plec                 | 1.78 | -    | 0.00230 | -       |
| 371 | IPI00400215.3 | Plec                 | 1.78 | -    | 0.00230 | -       |
| 372 | IPI00421268.1 | Plec                 | 1.78 | -    | 0.00230 | -       |
| 373 | IPI00400214.3 | Plec                 | 1.78 | -    | 0.00230 | -       |
| 374 | IPI00421267.1 | Plec                 | 1.78 | -    | 0.00230 | -       |
| 375 | IPI00626385.4 | Plec                 | 1.78 | -    | 0.00230 | -       |
| 376 | IPI00421271.1 | Plec                 | 1.78 | -    | 0.00230 | -       |
| 377 | IPI00625928.3 | Plec                 | 1.78 | -    | 0.00230 | -       |
| 378 | IPI00229509.3 | Plec                 | 1.78 | -    | 0.00230 | -       |
| 379 | IPI00468273.4 | Plec                 | 1.78 | -    | 0.00230 | -       |
| 380 | IPI00230061.2 | Plec                 | 1.78 | 0.83 | 0.00230 | 0.49522 |
| 381 | IPI00757181.1 | LOC100045958         | 1.84 | 0.96 | 0.00230 | -       |
| 382 | IPI00118447.1 | Pura;LOC100045958    | 1.84 | 1.11 | 0.00230 | -       |
| 383 | IPI00751607.1 | LOC100045958         | 1.84 | 1.08 | 0.00230 | 0.75733 |
| 384 | IPI00761643.2 | Psd3                 | 1.88 | -    | 0.00230 | -       |
| 385 | IPI00752884.1 | LOC100047616         | 2.12 | -    | 0.00230 | -       |
| 386 | IPI00895403.1 | Cacna1a              | 2.13 | 0.80 | 0.00230 | 0.74206 |
| 387 | IPI00408646.5 | Cacna1a              | 2.13 | -    | 0.00230 | -       |
| 388 | IPI00756139.1 | Syp                  | 2.64 | 0.70 | 0.00230 | 0.35843 |
| 389 | IPI00123505.2 | Syp                  | 2.64 | 0.66 | 0.00230 | -       |
| 390 | IPI00469548.2 | Syn2                 | 2.71 | 0.93 | 0.00230 | 0.71119 |
| 391 | IPI00828469.1 | Lap3                 | 1.35 | 0.93 | 0.00236 | 0.63364 |
| 392 | IPI00331436.4 | Lap3                 | 1.35 | -    | 0.00236 | -       |
| 393 | IPI00124771.1 | Slc25a3              | 1.82 | 1.23 | 0.00236 | 0.64844 |
| 394 | IPI00469392.2 | Rtn4                 | 0.54 | 1.02 | 0.00239 | 0.87475 |
| 395 | IPI00121288.5 | Ndufb10              | 1.44 | 1.04 | 0.00239 | 0.85137 |
| 396 | IPI00228044.1 | Camk2g               | 1.72 | 0.67 | 0.00239 | -       |
| 397 | IPI00135324.2 | Slc12a2              | 1.85 | 0.79 | 0.00239 | 0.47039 |
| 398 | IPI00169647.2 | Sh3glb2              | 2.10 | 0.99 | 0.00239 | 0.96295 |
| 399 | IPI00626834.2 | Sh3glb2              | 2.10 | 1.15 | 0.00239 | -       |
| 400 | IPI00153832.1 | Sh3glb2              | 2.10 | -    | 0.00239 | -       |
| 401 | IPI00828453.1 | Sh3glb2              | 2.10 | -    | 0.00239 | -       |
| 402 | IPI00876323.1 | Gm10221;Atp5l        | 1.36 | 1.03 | 0.00251 | 0.75733 |
| 403 | IPI00133240.1 | Uqcrrs1              | 1.42 | 1.07 | 0.00251 | 0.37683 |
| 404 | IPI00230540.1 | Vdac1                | 1.55 | 1.12 | 0.00251 | 0.50184 |
| 405 | IPI00122549.1 | Vdac1                | 1.55 | 1.02 | 0.00251 | -       |
| 406 | IPI00265239.1 | Gm10108;LOC100045958 | 1.61 | 1.10 | 0.00251 | 0.37683 |
| 407 | IPI00886222.1 | Ndufs6               | 1.77 | -    | 0.00251 | -       |
| 408 | IPI00128867.3 | Purb                 | 2.44 | 1.03 | 0.00251 | 0.93022 |
| 409 | IPI00943457.1 | Pcx                  | 1.69 | 0.97 | 0.00256 | 0.80046 |
| 410 | IPI00420394.4 | Vps13a               | 2.12 | 1.01 | 0.00256 | -       |
| 411 | IPI00762748.2 | Vps13a               | 2.12 | 0.84 | 0.00256 | 0.75774 |
| 412 | IPI00115875.8 | Pi4ka                | 2.13 | 0.80 | 0.00256 | 0.3992  |
| 413 | IPI00114380.1 | Gstm5                | 1.50 | 0.81 | 0.00263 | 0.3937  |



|     |               |                |      |      |         |         |
|-----|---------------|----------------|------|------|---------|---------|
| 414 | IPI00918764.1 | Pcdh1          | 1.98 | 0.85 | 0.00270 | 0.69343 |
| 415 | IPI00109153.6 | Slc17a7        | 2.91 | 0.89 | 0.00270 | 0.65064 |
| 416 | IPI00119138.1 | Uqcrc2         | 1.44 | 1.05 | 0.00274 | 0.60679 |
| 417 | IPI00122865.1 | Scamp5         | 1.52 | 0.78 | 0.00274 | 0.38574 |
| 418 | IPI00122547.1 | Vdac2          | 1.52 | 1.12 | 0.00274 | 0.36942 |
| 419 | IPI00762871.2 | Atp1a2         | 1.93 | 0.79 | 0.00274 | 0.53529 |
| 420 | IPI00109206.1 | Cox16;Synj2bp  | 2.20 | -    | 0.00274 | -       |
| 421 | IPI00117312.1 | Got2           | 1.55 | 0.96 | 0.00280 | 0.61297 |
| 422 | IPI00118075.1 | Mtap2          | 1.56 | -    | 0.00280 | -       |
| 423 | IPI00555059.2 | Prdx6          | 1.86 | -    | 0.00280 | -       |
| 424 | IPI00649708.1 | Srcin1         | 2.01 | 0.90 | 0.00287 | -       |
| 425 | IPI00317074.3 | Slc25a10       | 1.81 | 1.47 | 0.00291 | 0.31297 |
| 426 | IPI00890037.1 | Srcin1         | 1.93 | 0.86 | 0.00291 | 0.49522 |
| 427 | IPI00828919.2 | Camk2d         | 2.14 | -    | 0.00291 | -       |
| 428 | IPI00757808.1 | Snph           | 2.77 | 0.98 | 0.00291 | -       |
| 429 | IPI00608013.2 | Snph           | 2.77 | 1.03 | 0.00291 | -       |
| 430 | IPI00122928.1 | Tubb6          | 0.59 | 0.88 | 0.00296 | 0.47166 |
| 431 | IPI00831714.2 | Lrrc7          | 2.13 | -    | 0.00296 | -       |
| 432 | IPI00119130.1 | Btbd17         | 3.07 | 1.08 | 0.00296 | 0.78685 |
| 433 | IPI00116283.1 | Cct3           | 0.62 | 0.95 | 0.00303 | 0.66692 |
| 434 | IPI00112251.1 | Tubb3          | 0.55 | 0.93 | 0.00309 | 0.67004 |
| 435 | IPI00751137.1 | Tomm70a        | 1.66 | 1.03 | 0.00309 | 0.87527 |
| 436 | IPI00831546.1 | Chl1           | 0.34 | 1.23 | 0.00313 | 0.75369 |
| 437 | IPI00468481.2 | Atp5b          | 1.47 | 1.08 | 0.00313 | 0.35843 |
| 438 | IPI00132653.1 | Oxct1          | 1.60 | 1.15 | 0.00313 | 0.35616 |
| 439 | IPI00652758.1 | Tom1           | 1.63 | 0.74 | 0.00313 | 0.61644 |
| 440 | IPI00380814.1 | Tom1;Gm5884    | 1.63 | -    | 0.00313 | -       |
| 441 | IPI00116154.2 | LOC100046079;C | 1.63 | -    | 0.00318 | -       |
| 442 | IPI00785410.1 | Cox5b          | 1.63 | 1.00 | 0.00318 | 0.98022 |
| 443 | IPI00319602.3 | Cnp            | 1.58 | 0.87 | 0.00324 | 0.38737 |
| 444 | IPI00122826.1 | Cend1          | 2.25 | 1.18 | 0.00324 | 0.47039 |
| 445 | IPI00133403.1 | Ndufb3         | 1.48 | 1.04 | 0.00330 | 0.89484 |
| 446 | IPI00115626.1 | Ppap2b         | 2.14 | 0.81 | 0.00330 | 0.49522 |
| 447 | IPI00313475.1 | Atp5c1         | 1.35 | -    | 0.00336 | -       |
| 448 | IPI00869430.1 | Cap1           | 1.45 | 0.98 | 0.00336 | 0.91146 |
| 449 | IPI00137331.6 | Cap1           | 1.45 | -    | 0.00336 | -       |
| 450 | IPI00118986.1 | Atp5o;LOC10004 | 1.48 | 1.09 | 0.00336 | 0.3878  |
| 451 | IPI00894813.1 | Mfn2           | 1.59 | -    | 0.00336 | -       |
| 452 | IPI00415517.1 | Mfn2           | 1.59 | 0.99 | 0.00336 | -       |
| 453 | IPI00656317.2 | Stxbp5         | 1.65 | -    | 0.00336 | -       |
| 454 | IPI00755165.1 | Adam22         | 1.78 | -    | 0.00336 | -       |
| 455 | IPI00515604.2 | Adam22         | 1.78 | -    | 0.00336 | -       |
| 456 | IPI00515396.2 | Adam22         | 1.78 | -    | 0.00336 | -       |
| 457 | IPI00515580.2 | Adam22         | 1.78 | -    | 0.00336 | -       |
| 458 | IPI00753070.1 | Adam22         | 1.78 | -    | 0.00336 | -       |
| 459 | IPI00753519.1 | Adam22         | 1.78 | -    | 0.00336 | -       |
| 460 | IPI00515160.2 | Adam22         | 1.78 | 0.79 | 0.00336 | 0.35843 |
| 461 | IPI00749834.1 | Adam22         | 1.78 | -    | 0.00336 | -       |
| 462 | IPI00404650.2 | Adam22         | 1.78 | -    | 0.00336 | -       |
| 463 | IPI00752334.1 | Adam22         | 1.78 | -    | 0.00336 | -       |
| 464 | IPI00515509.2 | Adam22         | 1.78 | -    | 0.00336 | -       |
| 465 | IPI00753983.1 | Adam22         | 1.78 | -    | 0.00336 | -       |

|     |               |          |      |      |         |         |
|-----|---------------|----------|------|------|---------|---------|
| 466 | IPI00752342.1 | Adam22   | 1.78 | -    | 0.00336 | -       |
| 467 | IPI00221456.1 | Sv2b     | 3.24 | 0.98 | 0.00336 | 0.94077 |
| 468 | IPI00230192.5 | Gnao1    | 1.35 | 0.95 | 0.00348 | 0.74518 |
| 469 | IPI00356608.4 | Aak1     | 1.93 | -    | 0.00348 | -       |
| 470 | IPI00466069.3 | Eef2     | 0.62 | 1.12 | 0.00352 | 0.35843 |
| 471 | IPI00874456.1 | Dld      | 1.33 | 1.06 | 0.00352 | 0.44815 |
| 472 | IPI00111770.7 | Atp5k    | 1.42 | 1.21 | 0.00352 | 0.35843 |
| 473 | IPI00331182.4 | Gpd2     | 1.49 | -    | 0.00357 | -       |
| 474 | IPI00470981.2 | Rtn3     | 2.37 | -    | 0.00357 | -       |
| 475 | IPI00480414.2 | Rtn3     | 2.37 | 1.00 | 0.00357 | 0.95394 |
| 476 | IPI00874440.1 | 7-Sep    | 1.65 | 0.86 | 0.00370 | 0.49522 |
| 477 | IPI00110753.1 | Tuba1a   | 0.63 | 0.95 | 0.00374 | 0.65671 |
| 478 | IPI00119114.2 | Acadl    | 1.50 | -    | 0.00374 | -       |
| 479 | IPI00420725.4 | Camk2a   | 2.83 | -    | 0.00374 | -       |
| 480 | IPI00228253.2 | Acat2    | 0.60 | 0.97 | 0.00380 | 0.94711 |
| 481 | IPI00648683.3 | Ap1b1    | 1.53 | 0.94 | 0.00385 | 0.64165 |
| 482 | IPI00224210.5 | Uqcrq    | 1.66 | 1.15 | 0.00385 | 0.48898 |
| 483 | IPI00453834.2 | Acsbg1   | 1.94 | 0.89 | 0.00391 | 0.63964 |
| 484 | IPI00884460.1 | Prkca    | 2.14 | 0.95 | 0.00396 | 0.86133 |
| 485 | IPI00117348.4 | Tuba1b   | 0.62 | 0.97 | 0.00402 | 0.73026 |
| 486 | IPI00331174.5 | Cct7     | 0.63 | 0.94 | 0.00406 | 0.62095 |
| 487 | IPI00129516.1 | Uqcrh    | 1.62 | 1.14 | 0.00406 | 0.43956 |
| 488 | IPI00230310.5 | Hpca     | 1.69 | 0.95 | 0.00406 | -       |
| 489 | IPI00117181.1 | Flot1    | 1.54 | 0.94 | 0.00425 | 0.71616 |
| 490 | IPI00261627.1 | Sucla2   | 1.63 | 0.95 | 0.00430 | 0.67004 |
| 491 | IPI00111151.2 | Rph3a    | 2.43 | 0.90 | 0.00430 | 0.49522 |
| 492 | IPI00409045.2 | Ensa     | 1.89 | 1.25 | 0.00432 | 0.66881 |
| 493 | IPI00230470.1 | Ensa     | 1.89 | -    | 0.00432 | -       |
| 494 | IPI00133034.3 | Hint2    | 2.21 | 1.02 | 0.00432 | 0.95722 |
| 495 | IPI00623995.3 | Ttyh1    | 2.60 | -    | 0.00432 | -       |
| 496 | IPI00648401.1 | Dlgap3   | 2.67 | 0.59 | 0.00432 | 0.47426 |
| 497 | IPI00886413.1 | Mtx1     | 1.56 | -    | 0.00444 | -       |
| 498 | IPI00556723.1 | Dnm1l    | 1.54 | 0.93 | 0.00448 | 0.48176 |
| 499 | IPI00473693.3 | Pkp4     | 1.81 | -    | 0.00448 | -       |
| 500 | IPI00400209.1 | Plec     | 1.83 | -    | 0.00448 | -       |
| 501 | IPI00880613.1 | Ndufb10  | 1.41 | -    | 0.00460 | -       |
| 502 | IPI00406442.3 | Suclg1   | 1.51 | 0.97 | 0.00465 | 0.80225 |
| 503 | IPI00338880.3 | Nrcam    | 1.49 | 0.90 | 0.00476 | 0.81108 |
| 504 | IPI00228343.4 | Fech     | 1.81 | 1.08 | 0.00476 | 0.70417 |
| 505 | IPI00323592.2 | Mdh2     | 1.48 | 0.99 | 0.00481 | 0.9111  |
| 506 | IPI00230139.5 | Fkbp4    | 0.68 | 0.98 | 0.00485 | 0.95352 |
| 507 | IPI00125501.1 | Epb4.1l3 | 1.70 | -    | 0.00485 | -       |
| 508 | IPI00162781.2 | Ahcy1l   | 2.87 | 0.87 | 0.00485 | 0.47039 |
| 509 | IPI00943445.1 | Iars     | 0.57 | 1.16 | 0.00488 | 0.53529 |
| 510 | IPI00225201.5 | Iars     | 0.57 | -    | 0.00488 | -       |
| 511 | IPI00114246.2 | Ndufb11  | 1.55 | 1.17 | 0.00488 | 0.68639 |
| 512 | IPI00222833.1 | Lsamp    | 1.65 | -    | 0.00492 | -       |
| 513 | IPI00652675.2 | Lsamp    | 1.65 | 0.81 | 0.00492 | 0.35616 |
| 514 | IPI00117350.1 | Tuba4a   | 0.60 | 0.97 | 0.00498 | 0.69126 |
| 515 | IPI00653237.2 | Wdr7     | 1.77 | 0.82 | 0.00502 | 0.47039 |
| 516 | IPI00468100.5 | Pclo     | 1.84 | 0.96 | 0.00502 | 0.82627 |
| 517 | IPI00453499.3 | Iars2    | 1.38 | 1.05 | 0.00503 | 0.62108 |

|     |                |                  |      |      |         |         |
|-----|----------------|------------------|------|------|---------|---------|
| 518 | IPI00875798.1  | Ptprd            | 1.46 | 0.95 | 0.00503 | -       |
| 519 | IPI00918079.1  | Ndufab1          | 1.46 | 1.06 | 0.00503 | 0.5524  |
| 520 | IPI00133006.1  | Ndufab1          | 1.46 | -    | 0.00503 | -       |
| 521 | IPI00918301.1  | Ndufab1          | 1.46 | -    | 0.00503 | -       |
| 522 | IPI00169916.11 | Cltc             | 1.53 | -    | 0.00508 | -       |
| 523 | IPI00623890.1  | Dlg3             | 1.61 | 0.74 | 0.00512 | 0.45615 |
| 524 | IPI00136350.3  | Dlg3             | 1.61 | -    | 0.00512 | -       |
| 525 | IPI00753580.1  | Dlg3             | 1.61 | -    | 0.00512 | -       |
| 526 | IPI00918129.1  | Pde2a            | 1.86 | 0.92 | 0.00521 | -       |
| 527 | IPI00123817.1  | Atp6v1g2         | 2.62 | -    | 0.00521 | -       |
| 528 | IPI00895346.1  | Atp6v1g2         | 2.62 | 0.89 | 0.00521 | 0.61501 |
| 529 | IPI00462752.4  | Myo6             | 1.54 | -    | 0.00525 | -       |
| 530 | IPI00623496.5  | Myo6             | 1.54 | 0.91 | 0.00525 | 0.50973 |
| 531 | IPI00776169.1  | Pdk1             | 1.44 | 1.03 | 0.00529 | 0.86462 |
| 532 | IPI00221407.3  | Pdk1             | 1.44 | -    | 0.00529 | -       |
| 533 | IPI00754054.1  | Pclo             | 1.73 | -    | 0.00533 | -       |
| 534 | IPI00755057.1  | LOC677282        | 3.00 | 0.57 | 0.00533 | 0.47976 |
| 535 | IPI00136021.6  | Rims1            | 1.75 | 0.81 | 0.00538 | 0.38642 |
| 536 | IPI00134420.1  | Gdpd1            | 0.50 | 1.08 | 0.00543 | 0.70708 |
| 537 | IPI00752220.1  | Dlgap4           | 1.74 | 0.72 | 0.00559 | 0.50543 |
| 538 | IPI00330186.3  | Dlgap4           | 1.74 | -    | 0.00559 | -       |
| 539 | IPI00115544.1  | Gng4             | 1.62 | 0.94 | 0.00562 | 0.83415 |
| 540 | IPI00881096.1  | Napg             | 1.68 | 1.01 | 0.00562 | 0.92576 |
| 541 | IPI00109870.1  | Napg             | 1.68 | -    | 0.00562 | -       |
| 542 | IPI00128023.3  | Ndufs2           | 1.48 | 1.06 | 0.00572 | 0.37683 |
| 543 | IPI00417005.1  | Ntm              | 1.67 | 0.79 | 0.00579 | 0.39388 |
| 544 | IPI00857329.1  | Ntm              | 1.67 | -    | 0.00579 | -       |
| 545 | IPI00402778.1  | Ntm              | 1.67 | -    | 0.00579 | -       |
| 546 | IPI00828556.1  | Madd             | 1.74 | -    | 0.00579 | -       |
| 547 | IPI00757327.1  | Pkp4             | 1.75 | 0.68 | 0.00579 | -       |
| 548 | IPI00131177.1  | Letm1            | 1.44 | 1.04 | 0.00584 | 0.76381 |
| 549 | IPI00462846.3  | Ptprd            | 1.40 | -    | 0.00593 | -       |
| 550 | IPI00111960.2  | Gaa              | 1.64 | 1.16 | 0.00593 | 0.41351 |
| 551 | IPI00230418.5  | Vsnl1            | 1.65 | 0.86 | 0.00597 | 0.47614 |
| 552 | IPI00758248.3  | Iqsec2           | 2.24 | 0.81 | 0.00597 | 0.5499  |
| 553 | IPI00853823.2  | Rapgef2          | 1.77 | -    | 0.00601 | -       |
| 554 | IPI00776145.1  | Myo6             | 1.60 | -    | 0.00633 | -       |
| 555 | IPI00776187.1  | Myo6             | 1.60 | -    | 0.00633 | -       |
| 556 | IPI00124695.1  | Camk2g           | 1.72 | 0.93 | 0.00633 | -       |
| 557 | IPI00132002.1  | Mgst3            | 1.50 | 1.14 | 0.00637 | 0.31297 |
| 558 | IPI00331710.1  | Acad9            | 1.39 | -    | 0.00640 | -       |
| 559 | IPI00759881.1  | Acad9            | 1.39 | 1.07 | 0.00640 | 0.50546 |
| 560 | IPI00126085.1  | Cyp46a1          | 1.78 | 0.94 | 0.00640 | 0.52993 |
| 561 | IPI00853969.2  | LOC100044643     | 1.75 | -    | 0.00644 | -       |
| 562 | IPI00928012.1  | Ptprn2           | 1.75 | 0.95 | 0.00644 | 0.84603 |
| 563 | IPI00118191.2  | Ptprn2           | 1.75 | -    | 0.00644 | -       |
| 564 | IPI00776035.1  | Atp2b3           | 2.31 | -    | 0.00644 | -       |
| 565 | IPI00652871.1  | Wfs1             | 2.32 | 0.85 | 0.00644 | 0.38012 |
| 566 | IPI00114833.1  | Wfs1             | 2.32 | -    | 0.00644 | -       |
| 567 | IPI00114939.3  | Cbx6-Nptxr;Cbx6; | 1.78 | -    | 0.00671 | -       |
| 568 | IPI00605942.2  | Hras1            | 1.26 | -    | 0.00674 | -       |
| 569 | IPI00120342.6  | Slc17a6          | 2.44 | 0.85 | 0.00674 | 0.65671 |

|     |               |               |      |      |         |         |
|-----|---------------|---------------|------|------|---------|---------|
| 570 | IPI00658743.2 | Apoo          | 1.62 | 1.18 | 0.00675 | 0.45615 |
| 571 | IPI00121576.2 | Apoo          | 1.62 | -    | 0.00675 | -       |
| 572 | IPI00670400.2 | Apoo          | 1.62 | -    | 0.00675 | -       |
| 573 | IPI00221501.2 | Sh3bgrl2      | 2.65 | -    | 0.00675 | -       |
| 574 | IPI00227838.4 | Gng12         | 1.57 | 0.98 | 0.00691 | 0.95722 |
| 575 | IPI00400180.1 | Amph          | 1.41 | 1.03 | 0.00695 | 0.8719  |
| 576 | IPI00132728.2 | Cyc1          | 1.42 | 1.21 | 0.00700 | -       |
| 577 | IPI00109073.5 | Tubb4         | 0.54 | 0.95 | 0.00701 | 0.70951 |
| 578 | IPI00117352.1 | Tubb5         | 0.60 | 0.96 | 0.00701 | 0.76381 |
| 579 | IPI00930790.1 | Cox16         | 2.10 | -    | 0.00701 | -       |
| 580 | IPI00170212.2 | Cox16         | 2.10 | 0.99 | 0.00701 | -       |
| 581 | IPI00463495.2 | Synj2bp       | 2.10 | -    | 0.00701 | -       |
| 582 | IPI00654397.1 | Cox16         | 2.10 | -    | 0.00701 | -       |
| 583 | IPI00930820.1 | Synj2bp       | 2.10 | -    | 0.00701 | -       |
| 584 | IPI00930815.1 | Synj2bp       | 2.10 | -    | 0.00701 | -       |
| 585 | IPI00396701.3 | Rap2a         | 1.55 | 0.88 | 0.00709 | 0.64917 |
| 586 | IPI00124792.1 | Kcnj10        | 2.75 | 1.00 | 0.00709 | 0.86916 |
| 587 | IPI00469268.5 | Cct8          | 0.35 | 0.99 | 0.00718 | 0.95722 |
| 588 | IPI00464317.3 | Gls           | 1.89 | 0.93 | 0.00718 | 0.56985 |
| 589 | IPI00308162.3 | Slc25a12      | 1.45 | 1.05 | 0.00733 | 0.61596 |
| 590 | IPI00750074.1 | Atp5c1        | 1.33 | 1.08 | 0.00742 | 0.39831 |
| 591 | IPI00133215.3 | Ndufb7        | 1.43 | 0.94 | 0.00742 | 0.7441  |
| 592 | IPI00857195.1 | Itgav         | 1.92 | -    | 0.00742 | -       |
| 593 | IPI00120245.1 | Itgav         | 1.92 | -    | 0.00742 | -       |
| 594 | IPI00890038.2 | Syne1         | 3.50 | 0.59 | 0.00742 | 0.50968 |
| 595 | IPI00403993.5 | Syne1         | 3.50 | -    | 0.00742 | -       |
| 596 | IPI00651782.2 | Gbas          | 1.72 | 1.05 | 0.00746 | 0.67208 |
| 597 | IPI00338039.1 | Tubb2a        | 0.63 | 0.92 | 0.00749 | 0.54506 |
| 598 | IPI00330754.1 | Bdh1          | 1.53 | -    | 0.00749 | -       |
| 599 | IPI00154057.3 | Pcdh1         | 1.72 | 1.00 | 0.00758 | 0.97608 |
| 600 | IPI00153792.1 | 2410015M20Rik | 1.51 | 0.98 | 0.00762 | 0.92641 |
| 601 | IPI00132039.2 | Mtch2         | 1.34 | 1.10 | 0.00772 | 0.63619 |
| 602 | IPI00133706.1 | Rab1b         | 1.36 | 1.04 | 0.00774 | 0.81108 |
| 603 | IPI00228978.2 | Cltb          | 2.82 | 1.01 | 0.00774 | 0.95722 |
| 604 | IPI00751032.1 | Atp9a         | 0.58 | 1.10 | 0.00786 | 0.62931 |
| 605 | IPI00751937.1 | Atp9a         | 0.58 | -    | 0.00786 | -       |
| 606 | IPI00895965.1 |               | 1.54 | 0.95 | 0.00786 | -       |
| 607 | IPI00318496.1 | Gad1          | 2.32 | 1.08 | 0.00796 | 0.57476 |
| 608 | IPI00133342.1 | Atp5l         | 1.34 | -    | 0.00805 | -       |
| 609 | IPI00649019.1 | Ndufs5        | 1.54 | 0.95 | 0.00814 | 0.73565 |
| 610 | IPI00117300.3 | Ndufs5        | 1.54 | -    | 0.00814 | -       |
| 611 | IPI00308976.1 | Me3           | 1.75 | -    | 0.00814 | -       |
| 612 | IPI00876208.1 | Me3           | 1.75 | 1.04 | 0.00814 | -       |
| 613 | IPI00928125.1 | Me3           | 1.75 | 0.99 | 0.00814 | 0.94277 |
| 614 | IPI00322033.7 | Tom1l2        | 1.87 | -    | 0.00816 | -       |
| 615 | IPI00648853.4 | Tom1l2        | 1.87 | -    | 0.00816 | -       |
| 616 | IPI00381413.2 | Immt          | 1.60 | 1.01 | 0.00820 | -       |
| 617 | IPI00845772.1 | Cyc1          | 1.45 | 1.04 | 0.00824 | 0.81108 |
| 618 | IPI00314748.7 | Wdr1          | 1.48 | 0.98 | 0.00828 | 0.76061 |
| 619 | IPI00227928.3 | Slc6a1        | 1.93 | 0.77 | 0.00830 | 0.47039 |
| 620 | IPI00227267.2 | Epb4.1l2      | 3.35 | -    | 0.00830 | -       |
| 621 | IPI00323600.4 | Coro1a        | 1.61 | -    | 0.00850 | -       |

|     |               |              |      |      |         |         |
|-----|---------------|--------------|------|------|---------|---------|
| 622 | IPI00229554.5 | Slc6a17      | 2.74 | 0.97 | 0.00853 | 0.86238 |
| 623 | IPI00807833.2 | Madd         | 1.83 | -    | 0.00868 | -       |
| 624 | IPI00221614.3 | Arf3         | 1.32 | 0.94 | 0.00870 | 0.47039 |
| 625 | IPI00351827.6 | Shank3       | 2.93 | 0.71 | 0.00870 | 0.35843 |
| 626 | IPI00752685.2 | Gm8055       | 1.72 | -    | 0.00884 | -       |
| 627 | IPI00895295.1 | Rapgef2      | 1.68 | 0.85 | 0.00886 | 0.62701 |
| 628 | IPI00109311.3 | Slc9a3r1     | 4.39 | 0.93 | 0.00886 | 0.83925 |
| 629 | IPI00128285.1 | Ndufv3       | 1.58 | 1.23 | 0.00895 | 0.37683 |
| 630 | IPI00315302.5 | Ndufa2       | 1.68 | 0.89 | 0.00909 | 0.71119 |
| 631 | IPI00473646.2 | Rhot2        | 1.59 | -    | 0.00911 | -       |
| 632 | IPI00875863.1 | Rhot2        | 1.59 | 1.00 | 0.00911 | -       |
| 633 | IPI00123181.4 | Myh9         | 1.49 | 1.06 | 0.00919 | 0.72661 |
| 634 | IPI00875338.1 | Sgip1        | 1.49 | 0.76 | 0.00952 | -       |
| 635 | IPI00465788.4 | Sgip1        | 1.49 | -    | 0.00952 | -       |
| 636 | IPI00117087.1 | Cdc37        | 1.33 | 0.88 | 0.00975 | 0.64086 |
| 637 | IPI00759940.2 | Fh1          | 1.39 | 1.05 | 0.00976 | 0.73963 |
| 638 | IPI00128345.2 | Ndufs6       | 1.62 | 1.02 | 0.00976 | 0.65671 |
| 639 | IPI00230185.5 | Gpd1         | 5.25 | 0.89 | 0.00976 | 0.47605 |
| 640 | IPI00757097.2 | Shank2       | 1.67 | 0.70 | 0.00984 | 0.35843 |
| 641 | IPI00314755.5 | Hn1          | 0.22 | -    | 0.00998 | -       |
| 642 | IPI00463489.3 | Opcml        | 1.62 | -    | 0.01001 | -       |
| 643 | IPI00222496.3 | Pdia6        | 0.56 | 1.04 | 0.01002 | 0.66783 |
| 644 | IPI00387312.2 | Pfkl         | 1.44 | 0.81 | 0.01002 | 0.3937  |
| 645 | IPI00850337.1 | LOC100048117 | 1.68 | -    | 0.01002 | -       |
| 646 | IPI00850377.1 | Gm2451       | 1.68 | -    | 0.01002 | -       |
| 647 | IPI00918655.1 | Stxbp5       | 1.74 | -    | 0.01002 | -       |
| 648 | IPI00875100.1 | Stxbp5       | 1.74 | -    | 0.01002 | -       |
| 649 | IPI00269408.1 | Snap47       | 1.21 | 1.02 | 0.01020 | 0.92711 |
| 650 | IPI00134809.2 | Dlst         | 1.37 | 1.20 | 0.01028 | 0.3547  |
| 651 | IPI00403586.3 | Nceh1        | 1.65 | 1.04 | 0.01059 | 0.85097 |
| 652 | IPI00113244.3 | Ttyh1        | 2.36 | -    | 0.01059 | -       |
| 653 | IPI00648753.1 | Hpca         | 1.66 | -    | 0.01061 | -       |
| 654 | IPI00881347.1 | Hpca         | 1.66 | 0.76 | 0.01061 | 0.41029 |
| 655 | IPI00132216.1 | Ndufa3       | 1.59 | 1.14 | 0.01064 | 0.38012 |
| 656 | IPI00856384.1 | Atp5j2       | 1.50 | 1.09 | 0.01076 | 0.3937  |
| 657 | IPI00271986.6 | Atp5j2       | 1.50 | -    | 0.01076 | -       |
| 658 | IPI00347814.2 | BC085271     | 1.86 | 1.00 | 0.01088 | 0.98022 |
| 659 | IPI00850678.1 | Gm9531       | 1.86 | -    | 0.01088 | -       |
| 660 | IPI00755843.1 | Set          | 1.86 | -    | 0.01088 | -       |
| 661 | IPI00410883.1 | Set          | 1.86 | -    | 0.01088 | -       |
| 662 | IPI00111560.3 | Set;Gm9531   | 1.86 | -    | 0.01088 | -       |
| 663 | IPI00754518.1 | Set          | 1.86 | -    | 0.01088 | -       |
| 664 | IPI00170357.5 | Afg3l2       | 2.13 | 1.05 | 0.01088 | 0.83082 |
| 665 | IPI00553828.2 | Rims1        | 1.63 | -    | 0.01122 | -       |
| 666 | IPI00118692.6 | Rims1        | 1.63 | -    | 0.01122 | -       |
| 667 | IPI00553696.2 | Rims1        | 1.63 | -    | 0.01122 | -       |
| 668 | IPI00553549.2 | Rims1        | 1.63 | -    | 0.01122 | -       |
| 669 | IPI00831652.1 | Tomm40l      | 1.73 | 1.20 | 0.01122 | 0.54447 |
| 670 | IPI00113043.1 | Tomm40l      | 1.73 | -    | 0.01122 | -       |
| 671 | IPI00116753.4 | Etfa         | 1.27 | 0.98 | 0.01128 | 0.86046 |
| 672 | IPI00420569.2 | Atp1a2       | 2.00 | 0.84 | 0.01128 | 0.43238 |
| 673 | IPI00223216.5 | Tst          | 1.62 | 0.96 | 0.01131 | 0.86133 |

|     |               |            |      |      |         |         |
|-----|---------------|------------|------|------|---------|---------|
| 674 | IPI00775854.1 | Dlg2       | 2.28 | 0.69 | 0.01158 | -       |
| 675 | IPI00123058.1 | Cntn1      | 1.32 | 0.93 | 0.01161 | 0.76061 |
| 676 | IPI00762047.1 | Acly       | 0.78 | 0.77 | 0.01171 | 0.49522 |
| 677 | IPI00126248.3 | Acly       | 0.78 | 0.95 | 0.01171 | 0.78833 |
| 678 | IPI00458204.8 | Tubb2c-ps1 | 0.60 | -    | 0.01189 | -       |
| 679 | IPI00460558.3 | Erc2       | 1.96 | 0.44 | 0.01190 | 0.72929 |
| 680 | IPI00420931.1 | Erc2       | 1.96 | -    | 0.01190 | -       |
| 681 | IPI00113606.2 | Agk        | 1.41 | 1.06 | 0.01207 | 0.62995 |
| 682 | IPI00648173.1 | Cltc       | 1.47 | 0.91 | 0.01213 | 0.49522 |
| 683 | IPI00131896.1 | Brp44      | 1.73 | 0.89 | 0.01213 | 0.79187 |
| 684 | IPI00453689.1 | Sipa111    | 2.45 | 0.44 | 0.01251 | 0.44201 |
| 685 | IPI00453688.1 | Sipa111    | 2.45 | -    | 0.01251 | -       |
| 686 | IPI00399812.3 | Rogdi      | 1.81 | -    | 0.01262 | -       |
| 687 | IPI00624881.4 | Rogdi      | 1.81 | 0.88 | 0.01262 | 0.51846 |
| 688 | IPI00125960.1 | Ndrgr1     | 0.54 | 0.84 | 0.01264 | 0.38012 |
| 689 | IPI00454082.3 | Kif21a     | 1.56 | 0.77 | 0.01275 | 0.37683 |
| 690 | IPI00454081.1 | Kif21a     | 1.56 | -    | 0.01275 | -       |
| 691 | IPI00454084.1 | Kif21a     | 1.56 | -    | 0.01275 | -       |
| 692 | IPI00454083.1 | Kif21a     | 1.56 | -    | 0.01275 | -       |
| 693 | IPI00869453.1 | Kif21a     | 1.56 | -    | 0.01275 | -       |
| 694 | IPI00648355.3 | Rftn2      | 2.57 | 0.97 | 0.01275 | -       |
| 695 | IPI00229775.1 | Rftn2      | 2.57 | -    | 0.01275 | -       |
| 696 | IPI00856886.1 | Coro1a     | 1.67 | 1.02 | 0.01282 | 0.73026 |
| 697 | IPI00116843.1 | mt-Nd4     | 1.36 | 1.02 | 0.01294 | 0.74206 |
| 698 | IPI00169463.1 | Tubb2c     | 0.61 | 0.97 | 0.01301 | 0.84082 |
| 699 | IPI00116279.3 | Cct5       | 0.62 | 0.95 | 0.01318 | 0.82533 |
| 700 | IPI00608064.1 | Fech       | 1.72 | 1.13 | 0.01321 | -       |
| 701 | IPI00830456.1 | Dpp10      | 1.92 | 0.85 | 0.01321 | 0.54506 |
| 702 | IPI00396687.3 | Dpp10      | 1.92 | -    | 0.01321 | -       |
| 703 | IPI00464296.5 | Epb4.113   | 1.63 | 0.97 | 0.01329 | -       |
| 704 | IPI00229295.1 | Epb4.113   | 1.63 | 0.88 | 0.01329 | -       |
| 705 | IPI00229294.1 | Epb4.113   | 1.63 | 0.95 | 0.01329 | -       |
| 706 | IPI00955131.1 | Prdx5      | 1.39 | 0.94 | 0.01336 | 0.78569 |
| 707 | IPI00461964.3 | Aldh6a1    | 1.58 | 1.03 | 0.01339 | 0.76061 |
| 708 | IPI00114401.1 | Emd        | 0.78 | 1.24 | 0.01342 | 0.45615 |
| 709 | IPI00128826.1 | Cacng8     | 1.59 | 0.85 | 0.01344 | 0.47025 |
| 710 | IPI00277552.2 | Oxr1       | 2.19 | -    | 0.01361 | -       |
| 711 | IPI00654216.2 | Oxr1       | 2.19 | -    | 0.01361 | -       |
| 712 | IPI00117929.1 | Oxr1       | 2.19 | -    | 0.01361 | -       |
| 713 | IPI00845711.1 | Gria2      | 1.46 | 0.77 | 0.01362 | -       |
| 714 | IPI00608015.1 | Gria2      | 1.46 | 0.94 | 0.01362 | 0.44339 |
| 715 | IPI00136967.2 | Gria2      | 1.46 | -    | 0.01362 | -       |
| 716 | IPI00134997.3 | Dlgap3     | 2.48 | -    | 0.01362 | -       |
| 717 | IPI00462847.1 | Ptprd      | 1.41 | 0.94 | 0.01364 | -       |
| 718 | IPI00551337.1 | Ptprd      | 1.41 | -    | 0.01364 | -       |
| 719 | IPI00750473.1 | Lingo1     | 1.46 | 0.75 | 0.01364 | 0.62137 |
| 720 | IPI00134200.1 | Lingo1     | 1.46 | -    | 0.01364 | -       |
| 721 | IPI00874939.1 | Slc35f1    | 0.33 | 1.27 | 0.01368 | 0.54506 |
| 722 | IPI00396670.3 | Slc35f1    | 0.33 | -    | 0.01368 | -       |
| 723 | IPI00132526.1 | Camk4      | 1.55 | -    | 0.01368 | -       |
| 724 | IPI00877328.1 | Camk4      | 1.55 | 0.88 | 0.01368 | 0.74093 |
| 725 | IPI00128632.6 | AU040829   | 2.05 | -    | 0.01368 | -       |

|     |               |                |      |      |         |         |
|-----|---------------|----------------|------|------|---------|---------|
| 726 | IPI00648903.3 | AU040829       | 2.05 | 1.05 | 0.01368 | -       |
| 727 | IPI00831188.1 | AU040829       | 2.05 | -    | 0.01368 | -       |
| 728 | IPI00403810.2 | Tuba1c         | 0.64 | 0.96 | 0.01379 | 0.65555 |
| 729 | IPI00647986.1 | LOC100044356;N | 1.89 | 1.14 | 0.01382 | 0.47487 |
| 730 | IPI00228680.2 | Nrxn3          | 1.56 | 0.84 | 0.01389 | 0.48497 |
| 731 | IPI00658782.4 | LOC100044212;G | 1.79 | 0.75 | 0.01396 | 0.49522 |
| 732 | IPI00461277.4 | Rap1gap2       | 1.57 | 2.25 | 0.01440 | -       |
| 733 | IPI00875755.1 | Rap1gap2       | 1.57 | 0.92 | 0.01440 | 0.90659 |
| 734 | IPI00928106.1 | Kcnab2         | 2.57 | 0.60 | 0.01445 | -       |
| 735 | IPI00315359.1 | Kcnab2         | 2.57 | 0.83 | 0.01445 | -       |
| 736 | IPI00116281.3 | Cct6a          | 0.62 | 0.85 | 0.01451 | 0.39376 |
| 737 | IPI00757517.1 | Ttc7b          | 3.50 | 0.63 | 0.01458 | 0.2965  |
| 738 | IPI00121322.2 | Etfdh          | 1.67 | 1.27 | 0.01504 | 0.45615 |
| 739 | IPI00225533.1 | Necap1         | 1.76 | 0.94 | 0.01506 | 0.76574 |
| 740 | IPI00135677.2 | Ehd3           | 1.64 | 0.97 | 0.01508 | 0.73565 |
| 741 | IPI00133399.1 | Ndufa6         | 1.88 | 1.05 | 0.01537 | 0.60542 |
| 742 | IPI00621485.2 | Tom1l2         | 1.94 | -    | 0.01537 | -       |
| 743 | IPI00409418.7 | Tom1l2         | 1.94 | 0.94 | 0.01537 | 0.53529 |
| 744 | IPI00308667.1 | Dynlt3         | 3.32 | -    | 0.01539 | -       |
| 745 | IPI00329927.4 | Nfasc          | 1.42 | 0.95 | 0.01580 | 0.6995  |
| 746 | IPI00624192.3 | Dpysl5         | 0.55 | 1.12 | 0.01601 | 0.62763 |
| 747 | IPI00623241.3 | Sgip1          | 1.51 | 0.82 | 0.01601 | -       |
| 748 | IPI00128346.1 | Cisd1          | 1.43 | 1.16 | 0.01629 | 0.35616 |
| 749 | IPI00918906.1 | Opa1           | 1.63 | -    | 0.01661 | -       |
| 750 | IPI00750832.1 | Madd           | 1.58 | -    | 0.01663 | -       |
| 751 | IPI00651878.1 | Ak3l1          | 1.92 | 0.94 | 0.01688 | 0.54013 |
| 752 | IPI00125035.1 | Ak3l1;Ak3l2-ps | 1.92 | -    | 0.01688 | -       |
| 753 | IPI00408269.4 | Snap91         | 1.50 | -    | 0.01705 | -       |
| 754 | IPI00230165.1 | Snap91         | 1.50 | 0.92 | 0.01705 | 0.44339 |
| 755 | IPI00122409.1 | Snap91         | 1.50 | -    | 0.01705 | -       |
| 756 | IPI00322150.8 | Thop1          | 1.66 | 0.73 | 0.01705 | 0.58413 |
| 757 | IPI00405625.9 | Cyfp2          | 1.40 | 0.89 | 0.01707 | 0.45615 |
| 758 | IPI00230715.5 | Ndufa13        | 1.41 | 1.04 | 0.01728 | 0.8199  |
| 759 | IPI00228150.1 | Immt           | 1.48 | -    | 0.01728 | -       |
| 760 | IPI00112584.3 | Camk2d         | 2.07 | -    | 0.01729 | -       |
| 761 | IPI00230754.5 | Slc25a11       | 1.63 | 1.09 | 0.01744 | 0.49967 |
| 762 | IPI00816877.1 | Adcy5          | 1.50 | 0.76 | 0.01762 | 0.35843 |
| 763 | IPI00756908.2 | Adcy5          | 1.50 | -    | 0.01762 | -       |
| 764 | IPI00807819.1 | LOC100044663   | 1.68 | -    | 0.01762 | -       |
| 765 | IPI00856972.2 | Prkar1b        | 1.87 | 0.99 | 0.01776 | -       |
| 766 | IPI00857789.1 | Prkar1b        | 1.87 | 1.10 | 0.01776 | 0.48176 |
| 767 | IPI00310841.4 | Prkar1b        | 1.87 | -    | 0.01776 | -       |
| 768 | IPI00761957.1 | Psd3           | 1.95 | -    | 0.01778 | -       |
| 769 | IPI00122633.3 | Acsf2          | 1.73 | 1.00 | 0.01780 | 0.98873 |
| 770 | IPI00756703.1 | Ppp3ca         | 2.51 | -    | 0.01786 | -       |
| 771 | IPI00944706.1 | Bcas1          | 5.00 | 0.85 | 0.01790 | 0.57753 |
| 772 | IPI00330860.2 | Bcas1          | 5.00 | -    | 0.01790 | -       |
| 773 | IPI00470956.1 | Grm7           | 0.30 | 0.78 | 0.01791 | 0.45149 |
| 774 | IPI00462008.5 | LOC100047352   | 1.67 | -    | 0.01793 | -       |
| 775 | IPI00886354.1 | 4933407C03Rik  | 1.35 | -    | 0.01803 | -       |
| 776 | IPI00403174.2 | Slc25a25       | 1.48 | 1.10 | 0.01803 | 0.79634 |
| 777 | IPI00755086.1 | Slc25a25       | 1.48 | -    | 0.01803 | -       |

|     |               |                 |      |      |         |         |
|-----|---------------|-----------------|------|------|---------|---------|
| 778 | IPI00673886.5 | Sorbs2          | 1.86 | -    | 0.01837 | -       |
| 779 | IPI00923680.1 | Sorbs2          | 1.86 | 1.04 | 0.01837 | 0.90283 |
| 780 | IPI00119124.2 | Fundc1          | 2.35 | 0.97 | 0.01837 | 0.86916 |
| 781 | IPI00828479.1 | Acox1           | 0.73 | 1.07 | 0.01843 | -       |
| 782 | IPI00462075.4 | Gm5507          | 1.82 | -    | 0.01857 | -       |
| 783 | IPI00845840.1 | Pkm2            | 1.43 | 0.87 | 0.01858 | 0.47487 |
| 784 | IPI00930809.1 | Cacng3          | 4.08 | 0.75 | 0.01885 | 0.47039 |
| 785 | IPI00134137.1 | Gdap1           | 1.42 | 0.98 | 0.01931 | 0.8724  |
| 786 | IPI00138217.2 | Srr             | 1.91 | -    | 0.01942 | -       |
| 787 | IPI00407158.2 | Srr             | 1.91 | 1.04 | 0.01942 | 0.84304 |
| 788 | IPI00116394.2 | Atp9a           | 0.55 | -    | 0.01954 | -       |
| 789 | IPI00113149.1 | Stx1b           | 1.39 | -    | 0.01954 | -       |
| 790 | IPI00130624.1 | Pld3            | 1.86 | 1.28 | 0.01988 | 0.31297 |
| 791 | IPI00752412.1 | Atp1a3          | 1.86 | 0.68 | 0.02026 | -       |
| 792 | IPI00845775.1 | Ctbp1           | 1.63 | -    | 0.02039 | -       |
| 793 | IPI00463026.4 | Il1rap1         | 2.58 | 1.53 | 0.02057 | 0.5524  |
| 794 | IPI00349908.6 | Il1rap1         | 1.65 | -    | 0.02074 | -       |
| 795 | IPI00120984.5 | Ndufa8          | 1.38 | 1.05 | 0.02080 | 0.52386 |
| 796 | IPI00132050.1 | Ndufc2;LOC67585 | 1.50 | 1.06 | 0.02099 | 0.49522 |
| 797 | IPI00110825.1 | Ndufc2          | 1.50 | -    | 0.02099 | -       |
| 798 | IPI00885316.1 | Crk             | 1.44 | -    | 0.02100 | -       |
| 799 | IPI00124245.1 | G3bp2           | 0.63 | 1.14 | 0.02107 | 0.68399 |
| 800 | IPI00330269.3 | Dnajc6          | 1.56 | -    | 0.02107 | -       |
| 801 | IPI00650037.2 | Dnajc6          | 1.56 | 0.87 | 0.02107 | 0.35843 |
| 802 | IPI00762713.1 | Dnajc6          | 1.56 | -    | 0.02107 | -       |
| 803 | IPI00620097.2 | Madd            | 1.65 | -    | 0.02107 | -       |
| 804 | IPI00874726.1 | Madd            | 1.65 | -    | 0.02107 | -       |
| 805 | IPI00875369.1 | Madd            | 1.65 | -    | 0.02107 | -       |
| 806 | IPI00330606.4 | Madd            | 1.65 | 1.28 | 0.02107 | -       |
| 807 | IPI00606039.3 | Shank1          | 1.80 | 0.74 | 0.02108 | 0.37683 |
| 808 | IPI00857618.1 | Armc10          | 0.65 | -    | 0.02140 | -       |
| 809 | IPI00757909.2 | Armc10          | 0.65 | 1.18 | 0.02140 | 0.71877 |
| 810 | IPI00761607.1 | Hdhd2           | 1.56 | 0.94 | 0.02140 | 0.79851 |
| 811 | IPI00310916.1 | Cd81            | 1.78 | -    | 0.02149 | -       |
| 812 | IPI00889811.1 | Rpn2            | 0.76 | -    | 0.02154 | -       |
| 813 | IPI00754992.1 | Rpn2            | 0.76 | 1.12 | 0.02154 | 0.37683 |
| 814 | IPI00475154.1 | Rpn2            | 0.76 | -    | 0.02154 | -       |
| 815 | IPI00387379.1 | Decr1           | 1.34 | 0.93 | 0.02154 | 0.62627 |
| 816 | IPI00123186.4 | Rhot1           | 1.35 | 1.13 | 0.02187 | 0.3937  |
| 817 | IPI00312058.5 | Cat             | 0.61 | -    | 0.02196 | -       |
| 818 | IPI00930882.1 | Slc3a2          | 1.37 | 0.93 | 0.02198 | 0.76773 |
| 819 | IPI00114641.3 | Slc3a2          | 1.37 | -    | 0.02198 | -       |
| 820 | IPI00115599.6 | Hsd11b1         | 6.10 | -    | 0.02205 | -       |
| 821 | IPI00885751.1 | Hsd11b1         | 6.10 | 1.23 | 0.02205 | 0.37683 |
| 822 | IPI00227432.7 | Dnm3            | 1.33 | -    | 0.02207 | -       |
| 823 | IPI00625738.3 | Dnm3            | 1.33 | 0.90 | 0.02207 | 0.35843 |
| 824 | IPI00115827.1 | Gbas            | 1.70 | -    | 0.02239 | -       |
| 825 | IPI00133886.1 | Cuta            | 2.66 | -    | 0.02242 | -       |
| 826 | IPI00461933.2 | Cuta            | 2.66 | -    | 0.02242 | -       |
| 827 | IPI00752044.1 | LOC100045241    | 0.65 | 0.69 | 0.02253 | 0.45615 |
| 828 | IPI00654420.1 | Prosc           | 2.10 | 1.02 | 0.02253 | 0.9348  |
| 829 | IPI00131548.1 | Prosc           | 2.10 | -    | 0.02253 | -       |



|     |               |                 |      |      |         |         |
|-----|---------------|-----------------|------|------|---------|---------|
| 830 | IPI00284806.8 | Hprt            | 1.45 | 0.93 | 0.02285 | 0.59365 |
| 831 | IPI00849927.1 | Rpl10a;Gm15451  | 0.72 | 1.17 | 0.02313 | 0.35843 |
| 832 | IPI00226872.1 | Efh2            | 2.78 | 1.26 | 0.02357 | 0.37683 |
| 833 | IPI00112223.1 | Efh2            | 2.78 | -    | 0.02357 | -       |
| 834 | IPI00130661.1 | Tpp1            | 1.91 | 0.78 | 0.02370 | 0.79297 |
| 835 | IPI00831347.1 | Htra2           | 1.45 | -    | 0.02371 | -       |
| 836 | IPI00323819.3 | Rps20           | 0.73 | 1.21 | 0.02395 | 0.31297 |
| 837 | IPI00753468.2 | Ap2a2           | 1.34 | 0.88 | 0.02411 | 0.49522 |
| 838 | IPI00109061.1 | Tubb2b          | 0.62 | 0.86 | 0.02416 | 0.51846 |
| 839 | IPI00112555.3 | Gars            | 0.59 | 0.97 | 0.02420 | 0.88863 |
| 840 | IPI00869393.1 | Cat             | 0.64 | 0.93 | 0.02440 | 0.72694 |
| 841 | IPI00858243.1 | Fkbp4           | 0.67 | -    | 0.02476 | -       |
| 842 | IPI00816848.2 | Abcb7           | 1.47 | 1.00 | 0.02478 | 0.98022 |
| 843 | IPI00761646.3 | Abcb7           | 1.47 | -    | 0.02478 | -       |
| 844 | IPI00672663.2 | Abcb7           | 1.47 | -    | 0.02478 | -       |
| 845 | IPI00119063.2 | Lrp1            | 0.67 | 1.11 | 0.02502 | 0.38642 |
| 846 | IPI00381059.1 | Lrrc4b          | 0.67 | -    | 0.02526 | -       |
| 847 | IPI00310972.4 | Rap1gds1        | 1.52 | -    | 0.02526 | -       |
| 848 | IPI00131193.1 | mt-Co3          | 1.50 | -    | 0.02528 | -       |
| 849 | IPI00340932.1 | mt-Co3          | 1.50 | 1.05 | 0.02528 | 0.81239 |
| 850 | IPI00751369.1 | Ldha            | 1.38 | 0.94 | 0.02531 | 0.73026 |
| 851 | IPI00319994.6 | Ldha            | 1.38 | -    | 0.02531 | -       |
| 852 | IPI00116896.1 | mt-Atp8;mt-Atp6 | 1.42 | 1.01 | 0.02531 | 0.9364  |
| 853 | IPI00113347.3 | Crat            | 1.54 | -    | 0.02531 | -       |
| 854 | IPI00875497.1 | Crat            | 1.54 | 0.95 | 0.02531 | 0.76061 |
| 855 | IPI00378063.1 | Ap2b1           | 1.36 | 0.88 | 0.02551 | 0.49522 |
| 856 | IPI00662285.1 | Nptn            | 2.19 | 0.82 | 0.02604 | 0.37683 |
| 857 | IPI00465999.5 | Shank1          | 1.90 | -    | 0.02628 | -       |
| 858 | IPI00758339.1 | Shank1          | 1.90 | -    | 0.02628 | -       |
| 859 | IPI00750256.2 | Ak1             | 1.58 | 0.96 | 0.02640 | 0.59444 |
| 860 | IPI00128209.3 | Ak1             | 1.58 | -    | 0.02640 | -       |
| 861 | IPI00165731.3 | Abhd12          | 1.37 | 1.07 | 0.02643 | 0.39385 |
| 862 | IPI00762114.3 | Abhd12          | 1.37 | -    | 0.02643 | -       |
| 863 | IPI00349970.6 | Prickle2        | 1.88 | -    | 0.02643 | -       |
| 864 | IPI00876463.1 | Prickle2        | 1.88 | 0.32 | 0.02643 | 0.5754  |
| 865 | IPI00323571.1 | Apoe            | 1.59 | 1.14 | 0.02680 | 0.50543 |
| 866 | IPI00153660.4 | Dlat            | 1.41 | 1.13 | 0.02681 | 0.37683 |
| 867 | IPI00115650.4 | Cacybp          | 0.72 | 1.19 | 0.02712 | 0.45615 |
| 868 | IPI00314883.4 | Dnm2            | 1.37 | -    | 0.02712 | -       |
| 869 | IPI00131445.2 | Dnm2            | 1.37 | -    | 0.02712 | -       |
| 870 | IPI00129526.1 | Hsp90b1         | 0.80 | 1.09 | 0.02724 | 0.45615 |
| 871 | IPI00474157.4 | Tomm40          | 1.49 | 1.35 | 0.02728 | 0.37683 |
| 872 | IPI00133903.1 | Hspa9           | 1.24 | -    | 0.02733 | -       |
| 873 | IPI00880839.1 | Hspa9           | 1.24 | 1.02 | 0.02733 | 0.74093 |
| 874 | IPI00119346.1 | Calb2           | 1.49 | 1.04 | 0.02755 | 0.88994 |
| 875 | IPI00453777.2 | Atp5d           | 1.47 | 1.07 | 0.02770 | 0.76841 |
| 876 | IPI00130322.5 | Ndufa7          | 2.73 | 1.06 | 0.02775 | 0.64916 |
| 877 | IPI00114352.1 | Bin1            | 1.38 | 0.93 | 0.02797 | 0.49522 |
| 878 | IPI00338309.4 | Ryr2            | 1.58 | 0.93 | 0.02805 | 0.47039 |
| 879 | IPI00649253.1 | Pgm2;Pgm1       | 1.45 | 0.11 | 0.02816 | -       |
| 880 | IPI00122740.2 | Macrod1         | 1.83 | 1.12 | 0.02831 | 0.73565 |
| 881 | IPI00653921.2 | Rdx             | 1.99 | 1.03 | 0.02846 | 0.69244 |

|     |               |                 |      |      |         |         |
|-----|---------------|-----------------|------|------|---------|---------|
| 882 | IPI00222930.4 | Rhot1           | 1.27 | -    | 0.02887 | -       |
| 883 | IPI00515349.1 | Rhot1           | 1.27 | -    | 0.02887 | -       |
| 884 | IPI00808243.1 | 4933407C03Rik   | 1.30 | 0.80 | 0.02898 | -       |
| 885 | IPI00665002.4 | 4933407C03Rik   | 1.30 | -    | 0.02898 | -       |
| 886 | IPI00118978.4 | Hcn1            | 2.41 | 0.70 | 0.02906 | 0.65786 |
| 887 | IPI00817046.1 | Inpp5j          | 2.16 | 0.83 | 0.02942 | -       |
| 888 | IPI00653744.1 | Lrrc59          | 0.76 | 1.09 | 0.03011 | 0.63643 |
| 889 | IPI00111265.3 | Capza2          | 1.29 | 0.95 | 0.03086 | 0.66765 |
| 890 | IPI00890133.1 | Dnm1            | 2.86 | 0.88 | 0.03090 | 0.35843 |
| 891 | IPI00465648.3 | Dnm1            | 2.86 | -    | 0.03090 | -       |
| 892 | IPI00875326.1 | Tomm40          | 1.55 | -    | 0.03105 | -       |
| 893 | IPI00661414.2 | Arpc2           | 1.23 | 0.94 | 0.03134 | 0.54174 |
| 894 | IPI00330523.1 | Pcca            | 1.79 | 1.06 | 0.03137 | 0.81108 |
| 895 | IPI00222263.4 | Dlgap2          | 4.38 | -    | 0.03162 | -       |
| 896 | IPI00467058.2 | Dlgap2          | 4.38 | 0.85 | 0.03162 | 0.44643 |
| 897 | IPI00928507.1 | Dlgap2          | 4.38 | -    | 0.03162 | -       |
| 898 | IPI00474100.1 | Cnksr2          | 2.08 | 1.32 | 0.03184 | 0.8055  |
| 899 | IPI00110990.1 | Dusp3           | 2.13 | -    | 0.03187 | -       |
| 900 | IPI00848566.1 | Macf1           | 0.62 | 0.84 | 0.03194 | 0.47039 |
| 901 | IPI00121218.5 | Fahd2a          | 1.88 | 0.94 | 0.03194 | 0.71743 |
| 902 | IPI00223377.1 | Mbp             | 1.25 | 0.94 | 0.03212 | 0.59028 |
| 903 | IPI00108125.4 | Eif5a           | 0.77 | 0.98 | 0.03219 | 0.76194 |
| 904 | IPI00624653.1 | Usmg5           | 1.68 | 1.17 | 0.03223 | 0.39089 |
| 905 | IPI00135977.3 | Clic4           | 2.19 | -    | 0.03247 | -       |
| 906 | IPI00776084.1 | Atp5c1          | 1.26 | -    | 0.03272 | -       |
| 907 | IPI00131666.1 | Slc1a6          | 1.89 | 0.71 | 0.03283 | 0.35843 |
| 908 | IPI00875652.1 | Prkar1a         | 1.78 | -    | 0.03332 | -       |
| 909 | IPI00856377.1 | Prkar1b         | 1.78 | -    | 0.03332 | -       |
| 910 | IPI00856616.1 | Prkar1b         | 1.78 | -    | 0.03332 | -       |
| 911 | IPI00845776.1 | 3-Sep           | 1.74 | 0.93 | 0.03359 | 0.82533 |
| 912 | IPI00762700.2 | Myo6            | 1.51 | -    | 0.03391 | -       |
| 913 | IPI00117454.1 | Eps15           | 2.73 | 1.31 | 0.03394 | 0.66692 |
| 914 | IPI00474508.1 | -               | 1.83 | 0.87 | 0.03450 | 0.8537  |
| 915 | IPI00111255.1 | Cox7c;LOC100048 | 1.83 | 1.14 | 0.03450 | -       |
| 916 | IPI00225254.6 | Mtx2            | 1.49 | 1.08 | 0.03470 | 0.49823 |
| 917 | IPI00719901.2 | Prosc           | 1.87 | -    | 0.03623 | -       |
| 918 | IPI00115787.1 | Tm9sf2          | 0.75 | -    | 0.03681 | -       |
| 919 | IPI00653300.1 | Tm9sf2          | 0.75 | 1.19 | 0.03681 | 0.45615 |
| 920 | IPI00122548.3 | Vdac3           | 1.30 | 1.07 | 0.03681 | 0.77811 |
| 921 | IPI00876341.1 | Vdac3           | 1.30 | 1.07 | 0.03681 | 0.61501 |
| 922 | IPI00377681.2 | N28178;LOC1000  | 1.84 | -    | 0.03684 | -       |
| 923 | IPI00123639.1 | Calr            | 0.85 | 1.16 | 0.03692 | 0.31297 |
| 924 | IPI00749749.1 | Slc25a25        | 1.55 | -    | 0.03692 | -       |
| 925 | IPI00752950.1 | Slc25a25        | 1.55 | -    | 0.03692 | -       |
| 926 | IPI00265568.6 | Slc25a25        | 1.55 | 0.97 | 0.03692 | -       |
| 927 | IPI00751337.3 | D430041D05Rik   | 1.75 | -    | 0.03722 | -       |
| 928 | IPI00874461.1 | D430041D05Rik   | 1.75 | 0.79 | 0.03722 | 0.62552 |
| 929 | IPI00755241.1 | Nckap1          | 1.34 | 0.85 | 0.03819 | 0.39388 |
| 930 | IPI00319320.4 | Nckap1          | 1.34 | -    | 0.03819 | -       |
| 931 | IPI00874565.1 | Nckap1          | 1.34 | -    | 0.03819 | -       |
| 932 | IPI00117176.1 | Faah            | 1.56 | 0.98 | 0.03819 | -       |
| 933 | IPI00622833.2 | Tpd52           | 2.63 | -    | 0.03831 | -       |

|     |               |                 |      |      |         |         |
|-----|---------------|-----------------|------|------|---------|---------|
| 934 | IPI00625441.3 | Tpd52           | 2.63 | 0.91 | 0.03831 | 0.77811 |
| 935 | IPI00230212.5 | Gstm1           | 1.38 | 0.91 | 0.03844 | 0.52385 |
| 936 | IPI00649135.2 | Gstm1           | 1.38 | 0.68 | 0.03844 | -       |
| 937 | IPI00112327.2 | Mtx1            | 1.48 | -    | 0.03853 | -       |
| 938 | IPI00938432.1 | Mtx1            | 1.48 | 1.05 | 0.03853 | 0.83335 |
| 939 | IPI00229796.3 | Pygb            | 1.31 | 0.80 | 0.03893 | 0.47039 |
| 940 | IPI00133522.1 | P4hb            | 0.76 | 1.06 | 0.03902 | 0.59444 |
| 941 | IPI00656204.1 | Nckap1          | 1.41 | -    | 0.03922 | -       |
| 942 | IPI00230005.3 | Prkaca          | 1.21 | 0.98 | 0.03926 | 0.94711 |
| 943 | IPI00227900.1 | Prkaca          | 1.21 | -    | 0.03926 | -       |
| 944 | IPI00918701.1 | Brp44l          | 1.81 | 0.73 | 0.03926 | -       |
| 945 | IPI00113141.1 | Cs              | 1.24 | 1.00 | 0.03959 | 0.9364  |
| 946 | IPI00757585.1 | Klc2            | 0.78 | 0.95 | 0.04025 | 0.7881  |
| 947 | IPI00753928.1 | Klc2            | 0.78 | -    | 0.04025 | -       |
| 948 | IPI00844651.1 | Klc2            | 0.78 | -    | 0.04025 | -       |
| 949 | IPI00135626.2 | Aqp4            | 1.36 | -    | 0.04025 | -       |
| 950 | IPI00230738.2 | Aqp4            | 1.36 | -    | 0.04025 | -       |
| 951 | IPI00230737.2 | Aqp4            | 1.36 | 0.96 | 0.04025 | 0.67004 |
| 952 | IPI00751092.1 | Gm12270         | 0.64 | 0.94 | 0.04223 | -       |
| 953 | IPI00125901.5 | Rps13;Gm10159;l | 0.64 | -    | 0.04223 | -       |
| 954 | IPI00831541.1 | Capn5           | 0.70 | 0.79 | 0.04223 | 0.4103  |
| 955 | IPI00114962.1 | Capn5           | 0.70 | -    | 0.04223 | -       |
| 956 | IPI00131693.2 | Cntfr           | 1.28 | 0.90 | 0.04223 | 0.76194 |
| 957 | IPI00351472.1 | -               | 1.36 | -    | 0.04223 | -       |
| 958 | IPI00319111.3 | Sdhc            | 1.41 | 1.13 | 0.04223 | 0.54013 |
| 959 | IPI00622811.2 | Ap2m1           | 1.58 | 0.91 | 0.04223 | 0.55924 |
| 960 | IPI00116356.5 | Ap2m1           | 1.58 | 1.14 | 0.04223 | -       |
| 961 | IPI00112377.1 | Rdh14           | 1.64 | 1.04 | 0.04223 | 0.86645 |
| 962 | IPI00911165.1 | Gspt1           | 0.63 | 0.96 | 0.04228 | 0.83874 |
| 963 | IPI00230355.2 | Gspt1           | 0.63 | -    | 0.04228 | -       |
| 964 | IPI00875040.1 | Pcp4            | 2.63 | -    | 0.04228 | -       |
| 965 | IPI00831305.1 | Pcp4            | 2.63 | 0.87 | 0.04228 | 0.78183 |
| 966 | IPI00229996.5 | Pcp4            | 2.63 | -    | 0.04228 | -       |
| 967 | IPI00121378.2 | Alcam           | 1.29 | 0.92 | 0.04246 | 0.57665 |
| 968 | IPI00554845.2 | Immt            | 1.38 | 1.03 | 0.04252 | 0.78422 |
| 969 | IPI00775975.1 | Cdh13           | 1.31 | 0.83 | 0.04300 | 0.39872 |
| 970 | IPI00321320.3 | Grin2b          | 1.41 | 0.79 | 0.04312 | 0.49522 |
| 971 | IPI00121575.1 | Alg2            | 0.75 | 1.10 | 0.04330 | 0.45615 |
| 972 | IPI00648501.1 | Ak3l1           | 1.92 | -    | 0.04330 | -       |
| 973 | IPI00137460.3 | Armc10          | 0.65 | -    | 0.04411 | -       |
| 974 | IPI00265467.3 | Rgs6            | 1.95 | 1.10 | 0.04413 | 0.62623 |
| 975 | IPI00229598.4 | Cnp             | 1.63 | 0.78 | 0.04494 | -       |
| 976 | IPI00830211.1 | Rps10           | 0.64 | -    | 0.04632 | -       |
| 977 | IPI00112448.1 | Rps10           | 0.64 | 1.10 | 0.04632 | 0.71119 |
| 978 | IPI00762525.2 | -               | 0.64 | 1.21 | 0.04632 | -       |
| 979 | IPI00283600.2 | Slc25a23        | 1.90 | 1.18 | 0.04632 | 0.39388 |
| 980 | IPI00315808.3 | Mrps36          | 1.32 | 1.06 | 0.04657 | 0.39831 |
| 981 | IPI00123281.1 | Lrrc59          | 0.75 | -    | 0.04688 | -       |
| 982 | IPI00277874.4 | Stmn2           | 0.19 | -    | 0.04698 | -       |
| 983 | IPI00890167.1 | Stmn2           | 0.19 | -    | 0.04698 | -       |
| 984 | IPI00279443.1 | Hspa12a         | 1.47 | 0.94 | 0.04712 | 0.59331 |
| 985 | IPI00122486.3 | Camkv           | 1.29 | 0.75 | 0.04747 | 0.37683 |

|      |               |               |      |      |         |         |
|------|---------------|---------------|------|------|---------|---------|
| 986  | IPI00122349.1 | Dpysl3        | 0.32 | 1.46 | 0.04761 | -       |
| 987  | IPI00406447.3 | Dpysl3        | 0.32 | 1.15 | 0.04761 | 0.85039 |
| 988  | IPI00881485.1 | Dpysl3        | 0.32 | -    | 0.04761 | -       |
| 989  | IPI00853793.1 | LOC100048746  | 0.77 | -    | 0.04837 | -       |
| 990  | IPI00851014.1 | Gm2223        | 0.77 | 0.99 | 0.04837 | -       |
| 991  | IPI00230415.5 | Eif2s3x       | 0.77 | -    | 0.04837 | -       |
| 992  | IPI00134478.1 | Cox8a         | 1.84 | -    | 0.04921 | -       |
| 993  | IPI00848572.1 | LOC100048483  | 1.84 | -    | 0.04921 | -       |
| 994  | IPI00606510.1 | Pccb          | 1.41 | -    | 0.04951 | -       |
| 995  | IPI00918862.1 | Pccb          | 1.41 | 1.06 | 0.04951 | 0.75042 |
| 996  | IPI00468653.4 | Pccb          | 1.41 | -    | 0.04951 | -       |
| 997  | IPI00134058.3 | Erp44         | 0.44 | 1.11 | 0.04965 | 0.61426 |
| 998  | IPI00788326.1 | Cacnb3        | 1.58 | 1.20 | 0.04968 | 0.69244 |
| 999  | IPI00788347.1 | Cacnb3        | 1.58 | -    | 0.04968 | -       |
| 1000 | IPI00132734.1 | Dynll2        | 1.71 | 0.99 | 0.05016 | 0.94639 |
| 1001 | IPI00719927.2 | Pcdh1         | 1.84 | 1.05 | 0.05016 | 0.88276 |
| 1002 | IPI00465469.5 | Mapt          | 0.46 | 1.03 | 0.05040 | -       |
| 1003 | IPI00124389.1 | Chchd4        | 1.55 | -    | 0.05057 | -       |
| 1004 | IPI00458851.2 | -             | 0.60 | 1.05 | 0.05081 | 0.73026 |
| 1005 | IPI00875792.1 | Hmg1l1        | 0.60 | -    | 0.05081 | -       |
| 1006 | IPI00665601.1 | LOC637733     | 0.60 | -    | 0.05081 | -       |
| 1007 | IPI00420261.5 | Hmgb1;Gm15387 | 0.60 | -    | 0.05081 | -       |
| 1008 | IPI00127085.6 | Rpl10a        | 0.77 | -    | 0.05081 | -       |
| 1009 | IPI00223378.1 | Mbp           | 1.19 | -    | 0.05081 | -       |
| 1010 | IPI00555150.2 | Snx3          | 0.76 | 1.10 | 0.05098 | 0.68856 |
| 1011 | IPI00420136.2 | Snx3          | 0.76 | -    | 0.05098 | -       |
| 1012 | IPI00112312.3 | Ppp3cb        | 1.44 | -    | 0.05098 | -       |
| 1013 | IPI00475109.1 | Ppp3cb        | 1.44 | 0.98 | 0.05098 | 0.95528 |
| 1014 | IPI00828221.2 | Gpm6b         | 2.20 | 0.90 | 0.05122 | 0.73026 |
| 1015 | IPI00124115.1 | S100a13       | 1.53 | 1.35 | 0.05136 | 0.82671 |
| 1016 | IPI00896572.1 | Metap2        | 0.42 | 0.78 | 0.05141 | -       |
| 1017 | IPI00272238.5 | Metap2        | 0.42 | -    | 0.05141 | -       |
| 1018 | IPI00115620.1 | Psat1         | 1.55 | -    | 0.05149 | -       |
| 1019 | IPI00849626.1 | LOC100046628  | 0.69 | -    | 0.05189 | -       |
| 1020 | IPI00674226.5 | Gm5611        | 0.69 | -    | 0.05189 | -       |
| 1021 | IPI00127415.1 | Npm1          | 0.69 | -    | 0.05189 | -       |
| 1022 | IPI00468717.7 | LOC633387     | 0.69 | -    | 0.05189 | -       |
| 1023 | IPI00515155.1 | Npm1          | 0.69 | 1.16 | 0.05189 | 0.49522 |
| 1024 | IPI00649841.1 | Npm1          | 0.69 | -    | 0.05189 | -       |
| 1025 | IPI00648014.1 | Npm1          | 0.69 | -    | 0.05189 | -       |
| 1026 | IPI00674263.3 | Rap1gap       | 1.51 | -    | 0.05189 | -       |
| 1027 | IPI00649324.3 | Rap1gap       | 1.51 | 0.79 | 0.05189 | 0.38642 |
| 1028 | IPI00649617.5 | Rap1gap       | 1.51 | -    | 0.05189 | -       |
| 1029 | IPI00454016.5 | Mat2a         | 1.43 | -    | 0.05221 | -       |
| 1030 | IPI00135475.3 | Dbn1          | 0.62 | 1.03 | 0.05225 | 0.85958 |
| 1031 | IPI00406741.5 | Mtap4         | 0.70 | 0.99 | 0.05231 | 0.95795 |
| 1032 | IPI00874893.1 | Stx1b         | 1.37 | 0.77 | 0.05231 | 0.35843 |
| 1033 | IPI00123313.1 | Uba1          | 0.81 | 0.95 | 0.05233 | 0.64948 |
| 1034 | IPI00311767.4 | Slc20a2       | 2.00 | 0.96 | 0.05233 | -       |
| 1035 | IPI00229834.3 | Copa          | 0.67 | 1.23 | 0.05266 | -       |
| 1036 | IPI00928004.1 | Copa          | 0.67 | 1.06 | 0.05266 | 0.8204  |
| 1037 | IPI00123777.1 | Fut8          | 0.57 | -    | 0.05270 | -       |

|      |               |               |      |      |         |         |
|------|---------------|---------------|------|------|---------|---------|
| 1038 | IPI00606219.2 | Fut8          | 0.57 | -    | 0.05270 | -       |
| 1039 | IPI00850173.1 | -             | 0.59 | 0.95 | 0.05270 | -       |
| 1040 | IPI00338604.5 | Myh10         | 0.85 | 0.92 | 0.05270 | 0.8044  |
| 1041 | IPI00757312.1 | Myh10         | 0.85 | 0.94 | 0.05270 | -       |
| 1042 | IPI00515398.1 | Myh10         | 0.85 | 0.97 | 0.05270 | 0.89952 |
| 1043 | IPI00221845.1 | Atcay         | 1.31 | 0.89 | 0.05270 | 0.5009  |
| 1044 | IPI00346482.3 | Cdh10         | 1.79 | -    | 0.05270 | -       |
| 1045 | IPI00459383.2 | Abcb8         | 1.97 | 1.22 | 0.05270 | 0.35843 |
| 1046 | IPI00130535.1 | Dbt           | 1.48 | -    | 0.05275 | -       |
| 1047 | IPI00890234.1 | Dbt           | 1.48 | 1.06 | 0.05275 | 0.88492 |
| 1048 | IPI00626662.3 | Aldh1a1       | 1.83 | 1.20 | 0.05283 | 0.80225 |
| 1049 | IPI00125929.2 | Ndufa4        | 1.89 | 1.02 | 0.05283 | 0.91272 |
| 1050 | IPI00756676.3 | Bcas1         | 5.00 | -    | 0.05306 | -       |
| 1051 | IPI00227843.6 | Tpp2          | 1.33 | 0.90 | 0.05319 | -       |
| 1052 | IPI00307931.1 | Rhot1         | 1.23 | 1.07 | 0.05342 | 0.74914 |
| 1053 | IPI00471028.2 | Madd          | 1.73 | -    | 0.05342 | -       |
| 1054 | IPI00153990.1 | Actr1b        | 1.34 | 0.92 | 0.05361 | 0.5055  |
| 1055 | IPI00138089.4 | Lrrc47        | 0.41 | 1.11 | 0.05547 | -       |
| 1056 | IPI00751804.1 | LOC100047888  | 4.00 | -    | 0.05566 | -       |
| 1057 | IPI00315794.1 | Cyb5b         | 1.23 | 0.98 | 0.05576 | 0.85039 |
| 1058 | IPI00678532.3 | Fam82a2       | 1.34 | 0.88 | 0.05619 | 0.5487  |
| 1059 | IPI00116760.1 | Rab24         | 1.53 | 1.06 | 0.05626 | 0.78297 |
| 1060 | IPI00115429.1 | Ggt7          | 1.19 | -    | 0.05633 | -       |
| 1061 | IPI00928550.1 | Ggt7;Myh7b    | 1.19 | 1.03 | 0.05633 | 0.86238 |
| 1062 | IPI00622235.5 | Vcp           | 1.16 | 1.00 | 0.05652 | 0.87475 |
| 1063 | IPI00330477.4 | Epn1          | 1.98 | -    | 0.05684 | -       |
| 1064 | IPI00407944.2 | Epn1          | 1.98 | 0.87 | 0.05684 | 0.68765 |
| 1065 | IPI00131994.1 | Ndufb2        | 1.88 | 1.05 | 0.05747 | 0.73026 |
| 1066 | IPI00923036.1 | Pdcd6ip       | 1.71 | 0.95 | 0.05749 | 0.78422 |
| 1067 | IPI00944688.1 | Pdcd6ip       | 1.71 | -    | 0.05749 | -       |
| 1068 | IPI00453818.3 | Pdcd6ip       | 1.71 | 0.88 | 0.05749 | -       |
| 1069 | IPI00420385.4 | 11-Sep        | 1.42 | -    | 0.05778 | -       |
| 1070 | IPI00454142.5 | 11-Sep        | 1.42 | 1.11 | 0.05778 | 0.7202  |
| 1071 | IPI00454143.3 | 11-Sep        | 1.42 | -    | 0.05778 | -       |
| 1072 | IPI00114375.2 | Dpysl2        | 0.71 | 0.90 | 0.05800 | 0.49522 |
| 1073 | IPI00876202.1 | Nap1l4        | 0.71 | 0.80 | 0.05800 | 0.39385 |
| 1074 | IPI00133977.3 | Nap1l4        | 0.71 | -    | 0.05800 | -       |
| 1075 | IPI00889914.1 | Ankfy1        | 0.54 | 1.14 | 0.05819 | 0.38012 |
| 1076 | IPI00672213.3 | Clasp1        | 0.76 | 0.97 | 0.05839 | 0.93505 |
| 1077 | IPI00121788.1 | Prdx1         | 1.25 | 1.03 | 0.05839 | 0.86978 |
| 1078 | IPI00222767.1 | Pdhx          | 1.54 | 1.10 | 0.05839 | 0.45615 |
| 1079 | IPI00272681.2 | Gnal          | 1.93 | 0.87 | 0.05839 | 0.65253 |
| 1080 | IPI00229525.1 | Gnal          | 1.93 | -    | 0.05839 | -       |
| 1081 | IPI00881278.1 | Adcy9         | 2.10 | 0.22 | 0.05905 | 0.67836 |
| 1082 | IPI00313750.3 | Adcy9         | 2.10 | 0.70 | 0.05905 | -       |
| 1083 | IPI00116222.1 | Hibadh        | 1.73 | 0.94 | 0.05932 | 0.76381 |
| 1084 | IPI00554884.1 | Strn          | 1.51 | 1.03 | 0.06028 | 0.86916 |
| 1085 | IPI00352986.2 | Strn          | 1.51 | -    | 0.06028 | -       |
| 1086 | IPI00111416.1 | Stx12         | 0.59 | 1.09 | 0.06031 | 0.62603 |
| 1087 | IPI00124639.1 | Nt5c          | 2.00 | -    | 0.06055 | -       |
| 1088 | IPI00648626.1 | Nt5c          | 2.00 | 1.14 | 0.06055 | 0.48176 |
| 1089 | IPI00885497.1 | 4933407C03Rik | 1.30 | -    | 0.06073 | -       |

|      |               |                |      |      |         |         |
|------|---------------|----------------|------|------|---------|---------|
| 1090 | IPI00775867.1 | Slc24a2        | 3.85 | 0.78 | 0.06232 | 0.49522 |
| 1091 | IPI00221608.3 | Samm50         | 1.40 | 1.12 | 0.06296 | 0.42933 |
| 1092 | IPI00380227.1 | Nrgn           | 2.09 | 0.69 | 0.06296 | -       |
| 1093 | IPI00895370.1 | Gria3          | 2.03 | 0.90 | 0.06308 | 0.43541 |
| 1094 | IPI00131472.4 | Gria3          | 2.03 | -    | 0.06308 | -       |
| 1095 | IPI00309035.2 | Rpn1           | 0.73 | 1.10 | 0.06396 | 0.3937  |
| 1096 | IPI00230034.5 | Ddt            | 1.49 | -    | 0.06399 | -       |
| 1097 | IPI00655156.3 | Ccdc109a       | 1.30 | 1.10 | 0.06437 | 0.45615 |
| 1098 | IPI00331556.5 | Hspa4          | 1.39 | 0.88 | 0.06437 | 0.5127  |
| 1099 | IPI00317309.5 | Anxa5          | 1.76 | 0.91 | 0.06460 | 0.55514 |
| 1100 | IPI00474116.3 | Ppp3r1         | 1.86 | -    | 0.06515 | -       |
| 1101 | IPI00845833.1 | Ppp3r1         | 1.86 | 0.85 | 0.06515 | 0.47487 |
| 1102 | IPI00113377.1 | Rplp1          | 0.68 | 1.04 | 0.06553 | 0.8044  |
| 1103 | IPI00331555.2 | Bckdha         | 1.85 | 1.03 | 0.06553 | 0.72661 |
| 1104 | IPI00119152.1 | Cpe            | 1.46 | 1.11 | 0.06570 | 0.38012 |
| 1105 | IPI00122815.3 | P4hb           | 0.76 | -    | 0.06639 | -       |
| 1106 | IPI00881332.1 | Caprin1        | 0.40 | -    | 0.06660 | -       |
| 1107 | IPI00757359.1 | Caprin1        | 0.40 | 1.15 | 0.06660 | 0.57854 |
| 1108 | IPI00857226.1 | Acs1           | 1.51 | -    | 0.06660 | -       |
| 1109 | IPI00556840.1 | Acs1           | 1.51 | 1.07 | 0.06660 | 0.67208 |
| 1110 | IPI00112549.1 | Acs1           | 1.51 | -    | 0.06660 | -       |
| 1111 | IPI00230171.1 | Mink1          | 2.73 | 0.90 | 0.06660 | 0.75369 |
| 1112 | IPI00124753.3 | Mink1          | 2.73 | -    | 0.06660 | -       |
| 1113 | IPI00649777.1 | Mink1          | 2.73 | -    | 0.06660 | -       |
| 1114 | IPI00468997.2 | Mink1          | 2.73 | -    | 0.06660 | -       |
| 1115 | IPI00648909.1 | Mink1          | 2.73 | -    | 0.06660 | -       |
| 1116 | IPI00468900.5 | Atp2a2         | 1.21 | 0.93 | 0.06677 | -       |
| 1117 | IPI00322440.5 | Ube2k          | 0.35 | 0.83 | 0.06696 | -       |
| 1118 | IPI00135686.2 | Ppib           | 0.74 | 1.07 | 0.06696 | 0.63877 |
| 1119 | IPI00121105.2 | Hadh           | 1.46 | 1.06 | 0.06713 | 0.69343 |
| 1120 | IPI00119952.1 | Gpm6b          | 2.56 | -    | 0.06779 | -       |
| 1121 | IPI00165688.2 | Slc23a2        | 1.32 | 1.00 | 0.06786 | 0.97873 |
| 1122 | IPI00132093.1 | Pin1           | 1.33 | 0.96 | 0.06786 | 0.70862 |
| 1123 | IPI00875218.1 | Anxa6          | 1.42 | -    | 0.06786 | -       |
| 1124 | IPI00662936.2 | Tmem132b       | 2.10 | -    | 0.06786 | -       |
| 1125 | IPI00225993.1 | Adap1          | 1.66 | -    | 0.06808 | -       |
| 1126 | IPI00378768.5 | Adap1          | 1.66 | 1.02 | 0.06808 | 0.90928 |
| 1127 | IPI00750657.1 | LOC100045439   | 1.27 | 0.87 | 0.06850 | 0.76773 |
| 1128 | IPI00331265.8 | Mapt           | 0.54 | 0.97 | 0.06884 | 0.83082 |
| 1129 | IPI00453815.3 | Tbrg4          | 1.61 | 1.41 | 0.06953 | -       |
| 1130 | IPI00848390.1 | LOC100046166   | 1.61 | -    | 0.06953 | -       |
| 1131 | IPI00828226.1 | Tbrg4          | 1.61 | 1.22 | 0.06953 | 0.56346 |
| 1132 | IPI00223875.1 | Asrg1          | 2.65 | -    | 0.06983 | -       |
| 1133 | IPI00875943.1 | Asrg1          | 2.65 | 2.10 | 0.06983 | 0.69983 |
| 1134 | IPI00319231.4 | Rps15          | 0.57 | 1.18 | 0.06994 | 0.38012 |
| 1135 | IPI00407546.2 | Eif2s3y        | 0.74 | -    | 0.07001 | -       |
| 1136 | IPI00230416.5 | Eif2s3y        | 0.74 | -    | 0.07001 | -       |
| 1137 | IPI00466610.5 | Map2k1         | 1.88 | 0.88 | 0.07037 | 0.37683 |
| 1138 | IPI00900464.2 | Sorbs2         | 1.77 | -    | 0.07093 | -       |
| 1139 | IPI00154004.1 | LOC100046081;O | 1.60 | -    | 0.07095 | -       |
| 1140 | IPI00331295.4 | G3bp2          | 0.62 | 0.99 | 0.07103 | -       |
| 1141 | IPI00311236.1 | Rpl7           | 0.60 | 1.13 | 0.07114 | 0.45149 |

|      |               |                 |      |      |         |         |
|------|---------------|-----------------|------|------|---------|---------|
| 1142 | IPI00955651.1 | Rpl7            | 0.60 | -    | 0.07114 | -       |
| 1143 | IPI00133608.3 | Ociad1          | 1.28 | 1.07 | 0.07114 | 0.45751 |
| 1144 | IPI00137424.2 | Ecsit           | 1.31 | 1.05 | 0.07114 | 0.71175 |
| 1145 | IPI00620601.1 | Astn1           | 1.45 | 0.85 | 0.07114 | 0.37683 |
| 1146 | IPI00890092.1 | Aldh7a1         | 1.58 | 0.85 | 0.07157 | 0.49522 |
| 1147 | IPI00230084.5 | Aldh7a1         | 1.58 | -    | 0.07157 | -       |
| 1148 | IPI00117811.3 | Ap3d1           | 1.29 | 0.87 | 0.07193 | 0.49165 |
| 1149 | IPI00226958.3 | Ncln            | 1.19 | -    | 0.07204 | -       |
| 1150 | IPI00886162.1 | Ncln            | 1.19 | 1.15 | 0.07204 | 0.59028 |
| 1151 | IPI00133387.1 | Hsbp1           | 1.33 | 0.84 | 0.07204 | 0.59066 |
| 1152 | IPI00262319.4 | Madd            | 1.57 | -    | 0.07204 | -       |
| 1153 | IPI00753693.1 | Madd            | 1.57 | -    | 0.07204 | -       |
| 1154 | IPI00752156.1 | Madd            | 1.57 | -    | 0.07204 | -       |
| 1155 | IPI00828390.1 | Madd            | 1.57 | -    | 0.07204 | -       |
| 1156 | IPI00857052.1 | Madd            | 1.57 | -    | 0.07204 | -       |
| 1157 | IPI00756378.1 | Madd            | 1.57 | -    | 0.07204 | -       |
| 1158 | IPI00828295.1 | Madd            | 1.57 | -    | 0.07204 | -       |
| 1159 | IPI00828551.1 | Madd            | 1.57 | -    | 0.07204 | -       |
| 1160 | IPI00761754.2 | Madd            | 1.57 | -    | 0.07204 | -       |
| 1161 | IPI00875878.1 | Madd            | 1.57 | -    | 0.07204 | -       |
| 1162 | IPI00757009.1 | Madd            | 1.57 | -    | 0.07204 | -       |
| 1163 | IPI00751295.1 | Madd            | 1.57 | -    | 0.07204 | -       |
| 1164 | IPI00314316.3 | Mpp6            | 1.59 | 0.85 | 0.07286 | 0.50543 |
| 1165 | IPI00785449.1 | Folh1           | 1.90 | 0.15 | 0.07302 | 0.45615 |
| 1166 | IPI00330464.5 | Tdrkh           | 1.50 | 1.11 | 0.07348 | 0.50515 |
| 1167 | IPI00119305.3 | Pa2g4           | 0.42 | 1.33 | 0.07363 | 0.39388 |
| 1168 | IPI00475138.1 | Gm11223         | 0.45 | -    | 0.07375 | -       |
| 1169 | IPI00551236.3 | Stmn1           | 0.45 | 1.01 | 0.07375 | 0.8821  |
| 1170 | IPI00276926.3 | Slc25a1         | 1.21 | 1.11 | 0.07615 | 0.55416 |
| 1171 | IPI00110100.1 | Armc1           | 1.44 | 1.19 | 0.07622 | 0.44201 |
| 1172 | IPI00312527.4 | Crmp1           | 0.54 | 1.24 | 0.07634 | 0.48301 |
| 1173 | IPI00420734.1 | Mff             | 1.19 | 0.98 | 0.07634 | 0.84018 |
| 1174 | IPI00648714.1 | Eif5a           | 0.79 | 1.06 | 0.07645 | 0.76888 |
| 1175 | IPI00229334.1 | Ntrk2           | 1.54 | -    | 0.07645 | -       |
| 1176 | IPI00124692.1 | Taldo1          | 1.46 | 0.91 | 0.07655 | 0.50578 |
| 1177 | IPI00118963.1 | Mrpl12          | 1.40 | 1.06 | 0.07661 | 0.74093 |
| 1178 | IPI00652233.1 | Cspg5           | 1.41 | 0.53 | 0.07661 | 0.54506 |
| 1179 | IPI00132696.2 | Adck1           | 1.70 | 1.12 | 0.07733 | 0.76194 |
| 1180 | IPI00848900.1 | Gm12034         | 0.62 | -    | 0.07768 | -       |
| 1181 | IPI00465880.4 | Rps17           | 0.62 | -    | 0.07768 | -       |
| 1182 | IPI00755495.2 | Gm12034         | 0.62 | 1.13 | 0.07768 | 0.61123 |
| 1183 | IPI00133440.1 | Phb             | 1.19 | 1.08 | 0.07799 | 0.67004 |
| 1184 | IPI00162949.1 | Cdipt           | 1.21 | 1.00 | 0.07817 | 1       |
| 1185 | IPI00885326.1 | 1500003O03Rik   | 1.21 | 0.94 | 0.07817 | 0.86916 |
| 1186 | IPI00229680.5 | LOC100048622;1! | 1.21 | -    | 0.07817 | -       |
| 1187 | IPI00275992.3 | Htra2           | 1.34 | -    | 0.07845 | -       |
| 1188 | IPI00621301.2 | Daam1           | 0.58 | -    | 0.07865 | -       |
| 1189 | IPI00857742.1 | Daam1           | 0.58 | 0.77 | 0.07865 | 0.47686 |
| 1190 | IPI00402997.3 | Dap3            | 1.34 | -    | 0.07896 | -       |
| 1191 | IPI00119689.1 | Ap2b1           | 1.33 | -    | 0.07980 | -       |
| 1192 | IPI00405227.3 | Vcl             | 2.11 | 1.03 | 0.08003 | 0.79353 |
| 1193 | IPI00315908.1 | 1700020C11Rik   | 3.22 | 0.96 | 0.08063 | 0.64484 |

|      |               |                 |      |      |         |         |
|------|---------------|-----------------|------|------|---------|---------|
| 1194 | IPI00850413.1 | Pgap1           | 0.57 | 1.51 | 0.08121 | 0.49823 |
| 1195 | IPI00753459.1 | Grin1           | 1.36 | -    | 0.08149 | -       |
| 1196 | IPI00751834.1 | Grin1           | 1.36 | -    | 0.08149 | -       |
| 1197 | IPI00755459.1 | Grin1           | 1.36 | -    | 0.08149 | -       |
| 1198 | IPI00755015.1 | Grin1           | 1.36 | -    | 0.08149 | -       |
| 1199 | IPI00755985.1 | Grin1           | 1.36 | -    | 0.08149 | -       |
| 1200 | IPI00757811.1 | Grin1           | 1.36 | -    | 0.08149 | -       |
| 1201 | IPI00608056.1 | Grin1           | 1.36 | 0.78 | 0.08149 | 0.47039 |
| 1202 | IPI00118385.1 | Grin1           | 1.36 | -    | 0.08149 | -       |
| 1203 | IPI00754252.2 | Ahcyl2          | 2.70 | 0.86 | 0.08149 | 0.49522 |
| 1204 | IPI00308446.3 | Ahcyl2          | 2.70 | -    | 0.08149 | -       |
| 1205 | IPI00468385.1 | LOC100047314;G  | 0.63 | -    | 0.08184 | -       |
| 1206 | IPI00555045.2 | Rpl21           | 0.63 | -    | 0.08184 | -       |
| 1207 | IPI00473445.1 | Gm7218          | 0.63 | -    | 0.08184 | -       |
| 1208 | IPI00315548.3 | Gm10240;Rpl21;C | 0.63 | -    | 0.08184 | -       |
| 1209 | IPI00875087.1 | -               | 0.63 | -    | 0.08184 | -       |
| 1210 | IPI00757596.3 | Uso1            | 1.29 | 0.94 | 0.08184 | -       |
| 1211 | IPI00128071.7 | Uso1            | 1.29 | -    | 0.08184 | -       |
| 1212 | IPI00927968.1 | Cpne6           | 1.58 | 0.84 | 0.08257 | 0.63964 |
| 1213 | IPI00129451.1 | Cpne6           | 1.58 | -    | 0.08257 | -       |
| 1214 | IPI00849478.1 | LOC100047252    | 1.57 | 0.98 | 0.08296 | 0.9348  |
| 1215 | IPI00848485.1 | LOC100047252    | 1.57 | 0.76 | 0.08296 | -       |
| 1216 | IPI00751146.1 | Twf2            | 1.82 | 0.79 | 0.08296 | 0.73549 |
| 1217 | IPI00129299.3 | Twf2            | 1.82 | -    | 0.08296 | -       |
| 1218 | IPI00109611.1 | Fam162a         | 1.50 | 1.08 | 0.08352 | 0.62995 |
| 1219 | IPI00116825.1 | Abcf2           | 0.65 | 1.18 | 0.08419 | 0.47039 |
| 1220 | IPI00554917.4 | Cln6            | 0.61 | 1.66 | 0.08436 | -       |
| 1221 | IPI00875404.1 | Cln6            | 0.61 | -    | 0.08436 | -       |
| 1222 | IPI00626860.1 | Mcts1           | 0.78 | -    | 0.08538 | -       |
| 1223 | IPI00874436.1 | Mcts1           | 0.78 | 0.96 | 0.08538 | 0.67004 |
| 1224 | IPI00123831.2 | Nptn            | 1.80 | -    | 0.08570 | -       |
| 1225 | IPI00627008.2 | Ptprz1          | 1.69 | 1.06 | 0.08581 | 0.81699 |
| 1226 | IPI00471006.1 | Elfn2           | 1.53 | 0.65 | 0.08634 | 0.31297 |
| 1227 | IPI00751809.1 | Ndr3            | 1.43 | -    | 0.08653 | -       |
| 1228 | IPI00122421.5 | Rpl27;Gm6199;Gi | 0.77 | 1.20 | 0.08672 | 0.35843 |
| 1229 | IPI00338964.3 | Atp2a2          | 1.23 | 1.07 | 0.08726 | 0.42841 |
| 1230 | IPI00153448.3 | Them4           | 1.66 | 0.91 | 0.08726 | 0.77811 |
| 1231 | IPI00320462.4 | Bphl            | 1.52 | 0.83 | 0.08770 | 0.44201 |
| 1232 | IPI00474002.1 | Stmn2           | 0.18 | 0.83 | 0.08772 | -       |
| 1233 | IPI00115866.3 | Hagh            | 3.79 | -    | 0.08772 | -       |
| 1234 | IPI00880581.3 | Hagh            | 3.79 | 1.00 | 0.08772 | 0.99343 |
| 1235 | IPI00473707.3 | 6-Sep           | 1.28 | -    | 0.08784 | -       |
| 1236 | IPI00226602.3 | 6-Sep           | 1.28 | -    | 0.08784 | -       |
| 1237 | IPI00309207.5 | Pafah1b1        | 0.46 | 0.86 | 0.08842 | 0.49165 |
| 1238 | IPI00124900.1 | Auh             | 1.56 | 1.09 | 0.08907 | 0.49522 |
| 1239 | IPI00850488.1 | LOC100045900    | 1.28 | 0.74 | 0.08952 | 0.35843 |
| 1240 | IPI00850693.1 | LOC100045900    | 1.28 | -    | 0.08952 | -       |
| 1241 | IPI00229528.5 | Bai1            | 1.28 | -    | 0.08952 | -       |
| 1242 | IPI00229256.5 | Syt7            | 1.80 | 0.72 | 0.09025 | 0.47039 |
| 1243 | IPI00848818.1 | Mtap4           | 0.47 | 1.05 | 0.09094 | 0.84321 |
| 1244 | IPI00134941.1 | Kras            | 1.27 | 0.89 | 0.09094 | 0.53529 |
| 1245 | IPI00113248.1 | Kras            | 1.27 | -    | 0.09094 | -       |



|      |               |               |      |      |         |         |
|------|---------------|---------------|------|------|---------|---------|
| 1246 | IPI00338327.1 | Ndr3          | 1.38 | 0.92 | 0.09094 | 0.71708 |
| 1247 | IPI00136107.1 | Ndr3          | 1.38 | 0.93 | 0.09094 | 0.52558 |
| 1248 | IPI00649331.1 | Prkag2        | 0.58 | -    | 0.09313 | -       |
| 1249 | IPI00457576.1 | Prkag2        | 0.58 | -    | 0.09313 | -       |
| 1250 | IPI00856174.1 | Prkag2        | 0.58 | -    | 0.09313 | -       |
| 1251 | IPI00128126.1 | Prkag2        | 0.58 | -    | 0.09313 | -       |
| 1252 | IPI00858265.2 | Prkag2        | 0.58 | -    | 0.09313 | -       |
| 1253 | IPI00124684.1 | Tsn           | 0.68 | 1.39 | 0.09313 | 0.67004 |
| 1254 | IPI00676914.1 | LOC675857     | 1.17 | -    | 0.09313 | -       |
| 1255 | IPI00266836.1 | 1810026J23Rik | 1.51 | 1.07 | 0.09398 | 0.76538 |
| 1256 | IPI00953756.1 | Inpp5j        | 1.96 | -    | 0.09398 | -       |
| 1257 | IPI00173277.1 | Inpp5j        | 1.96 | -    | 0.09398 | -       |
| 1258 | IPI00123486.1 | Scamp4        | 1.81 | -    | 0.09416 | -       |
| 1259 | IPI00111501.1 | Cplx2         | 1.38 | 0.82 | 0.09523 | 0.43541 |
| 1260 | IPI00308691.1 | Slc2a1        | 2.75 | -    | 0.09523 | -       |
| 1261 | IPI00884508.1 | Slc2a1        | 2.75 | 0.93 | 0.09523 | 0.5524  |
| 1262 | IPI00128363.1 | Mark1         | 1.47 | -    | 0.09538 | -       |
| 1263 | IPI00119618.1 | Canx          | 0.83 | 1.00 | 0.09556 | 0.98022 |
| 1264 | IPI00623629.2 | Mapk10        | 1.55 | 0.99 | 0.09556 | 0.98022 |
| 1265 | IPI00776102.1 | Mapk10        | 1.55 | -    | 0.09556 | -       |
| 1266 | IPI00775773.1 | Mapk10        | 1.55 | -    | 0.09556 | -       |
| 1267 | IPI00406158.5 | Mapk10        | 1.55 | -    | 0.09556 | -       |
| 1268 | IPI00762375.2 | Mapk10        | 1.55 | -    | 0.09556 | -       |
| 1269 | IPI00880252.1 | Serpinh1      | 0.63 | 1.15 | 0.09561 | 0.47039 |
| 1270 | IPI00114733.1 | Serpinh1      | 0.63 | -    | 0.09561 | -       |
| 1271 | IPI00410985.4 | Cadm1         | 1.36 | 0.77 | 0.09561 | 0.49522 |
| 1272 | IPI00411088.5 | Cadm1         | 1.36 | -    | 0.09561 | -       |
| 1273 | IPI00115117.1 | Stoml2        | 1.27 | 1.03 | 0.09614 | 0.85571 |
| 1274 | IPI00129506.1 | Timm17a       | 1.63 | 0.92 | 0.09704 | -       |
| 1275 | IPI00755231.1 | Cds2          | 1.27 | 1.04 | 0.09759 | -       |
| 1276 | IPI00230067.3 | Ptprs         | 1.28 | -    | 0.09759 | -       |
| 1277 | IPI00915502.1 | Ptprs         | 1.28 | -    | 0.09759 | -       |
| 1278 | IPI00915512.1 | Ptprs         | 1.28 | -    | 0.09759 | -       |
| 1279 | IPI00928064.2 | Mark1         | 1.39 | 0.83 | 0.09956 | 0.45615 |
| 1280 | IPI00377680.4 | Adcy2         | 1.66 | 0.57 | 0.09956 | 0.38642 |
| 1281 | IPI00875457.1 | Lrpprc        | 0.88 | 1.08 | 0.09993 | 0.6372  |
| 1282 | IPI00420706.4 | Lrpprc        | 0.88 | -    | 0.09993 | -       |
| 1283 | IPI00230566.4 | Gng7          | 1.68 | 0.86 | 0.09993 | 0.49522 |
| 1284 | IPI00620804.2 | Klc1          | 0.69 | 0.95 | 0.10031 | 0.84015 |
| 1285 | IPI00655083.1 | Klc1          | 0.69 | -    | 0.10031 | -       |
| 1286 | IPI00874566.1 | Klc1          | 0.69 | -    | 0.10031 | -       |
| 1287 | IPI00623075.3 | Klc1          | 0.69 | -    | 0.10031 | -       |
| 1288 | IPI00653706.1 | Fam126b       | 4.25 | 0.74 | 0.10080 | 0.49522 |
| 1289 | IPI00226426.5 | Fam126b       | 4.25 | -    | 0.10080 | -       |
| 1290 | IPI00127417.1 | Nme2          | 0.82 | 0.91 | 0.10298 | 0.59028 |
| 1291 | IPI00468999.4 | Cds2          | 1.25 | -    | 0.10334 | -       |
| 1292 | IPI00129577.1 | Aifm1         | 1.41 | -    | 0.10334 | -       |
| 1293 | IPI00776047.1 | Aifm1         | 1.41 | 1.21 | 0.10334 | 0.35843 |
| 1294 | IPI00929839.1 | Actr10        | 0.67 | 1.02 | 0.10341 | 0.9364  |
| 1295 | IPI00137206.1 | Actr10        | 0.67 | -    | 0.10341 | -       |
| 1296 | IPI00314950.2 | Rplp0         | 0.83 | 1.63 | 0.10341 | 0.35843 |
| 1297 | IPI00626366.3 | Gm8730        | 0.83 | 1.14 | 0.10341 | -       |

|      |               |                 |      |      |         |         |
|------|---------------|-----------------|------|------|---------|---------|
| 1298 | IPI00222759.3 | Vat1l           | 1.24 | 0.85 | 0.10341 | 0.56891 |
| 1299 | IPI00124742.3 | Eif4h           | 1.36 | -    | 0.10341 | -       |
| 1300 | IPI00222560.7 | Eif4h           | 1.36 | 1.07 | 0.10341 | 0.59365 |
| 1301 | IPI00830283.1 | Abhd6           | 1.43 | 1.21 | 0.10341 | 0.47039 |
| 1302 | IPI00321386.2 | Abhd6           | 1.43 | -    | 0.10341 | -       |
| 1303 | IPI00649152.3 | Anxa6           | 1.45 | 0.81 | 0.10341 | 0.62548 |
| 1304 | IPI00554894.2 | Anxa6           | 1.45 | 0.75 | 0.10341 | 0.35616 |
| 1305 | IPI00272230.1 | Rab39b          | 1.58 | 1.34 | 0.10341 | 0.31297 |
| 1306 | IPI00125807.3 | Mpi             | 1.65 | 0.92 | 0.10341 | 0.85843 |
| 1307 | IPI00135698.1 | mt-Atp6         | 1.90 | 1.03 | 0.10350 | 0.8044  |
| 1308 | IPI00123746.1 | Cdh13           | 1.27 | -    | 0.10401 | -       |
| 1309 | IPI00320217.9 | Cct2            | 0.67 | 1.03 | 0.10409 | 0.37683 |
| 1310 | IPI00410819.3 | Ddost           | 0.77 | 1.12 | 0.10409 | 0.37995 |
| 1311 | IPI00117705.1 | Ddost           | 0.77 | -    | 0.10409 | -       |
| 1312 | IPI00875723.1 | Camk2b          | 1.21 | -    | 0.10409 | -       |
| 1313 | IPI00649778.1 | Camk2b          | 1.21 | 0.91 | 0.10409 | 0.63059 |
| 1314 | IPI00474502.2 | Camk2b          | 1.21 | -    | 0.10409 | -       |
| 1315 | IPI00124046.1 | Mpp6            | 1.65 | -    | 0.10409 | -       |
| 1316 | IPI00928268.1 | Pgls            | 0.76 | 0.94 | 0.10468 | 0.67208 |
| 1317 | IPI00344142.4 | Lin7a           | 1.49 | 0.73 | 0.10468 | 0.37683 |
| 1318 | IPI00856405.1 | Sez6l2          | 0.63 | -    | 0.10494 | -       |
| 1319 | IPI00128454.1 | Sez6l2          | 0.63 | -    | 0.10494 | -       |
| 1320 | IPI00114162.3 | Fabp5           | 0.59 | 0.90 | 0.10604 | 0.86467 |
| 1321 | IPI00757353.2 | Spna2           | 1.19 | 0.95 | 0.10604 | 0.70019 |
| 1322 | IPI00230108.6 | Pdia3           | 0.82 | 1.07 | 0.10637 | 0.47614 |
| 1323 | IPI00115546.4 | Gnao1           | 1.32 | 0.88 | 0.10637 | 0.52558 |
| 1324 | IPI00129319.3 | Ppp1r7          | 1.63 | 0.89 | 0.10637 | 0.5772  |
| 1325 | IPI00330862.5 | Ezr;LOC10004417 | 1.95 | 1.04 | 0.10753 | 0.84321 |
| 1326 | IPI00320208.3 | Eef1b2          | 0.66 | 1.27 | 0.10754 | 0.38012 |
| 1327 | IPI00323357.3 | Hspa8           | 1.15 | 0.96 | 0.10794 | 0.73549 |
| 1328 | IPI00649804.2 | Prkar1a         | 1.57 | 1.10 | 0.10794 | 0.5754  |
| 1329 | IPI00119575.3 | Prkar1a         | 1.57 | -    | 0.10794 | -       |
| 1330 | IPI00762049.2 | Prkar1a         | 1.57 | 0.86 | 0.10794 | 0.78569 |
| 1331 | IPI00761641.1 | Scn2a1          | 1.22 | 0.75 | 0.10803 | 0.47039 |
| 1332 | IPI00123709.1 | Akap12          | 0.36 | -    | 0.10837 | -       |
| 1333 | IPI00867770.1 | Akap12          | 0.36 | 0.84 | 0.10837 | -       |
| 1334 | IPI00124820.2 | Coro1c          | 0.83 | 0.91 | 0.10837 | 0.71851 |
| 1335 | IPI00652817.1 | Slc32a1         | 1.61 | -    | 0.10837 | -       |
| 1336 | IPI00402900.3 | Elmo2           | 1.39 | -    | 0.10926 | -       |
| 1337 | IPI00756692.2 | Elmo2           | 1.39 | -    | 0.10926 | -       |
| 1338 | IPI00133224.1 | Fxyd6           | 0.71 | -    | 0.10957 | -       |
| 1339 | IPI00230553.1 | Fxyd6           | 0.71 | 1.03 | 0.10957 | -       |
| 1340 | IPI00648654.1 | Dusp3           | 2.02 | 0.46 | 0.10957 | 0.65135 |
| 1341 | IPI00466424.4 | Rab1            | 1.12 | -    | 0.10972 | -       |
| 1342 | IPI00880463.1 | Ddah1           | 1.23 | 1.12 | 0.11014 | 0.70155 |
| 1343 | IPI00121515.5 | Caprin1         | 0.40 | -    | 0.11018 | -       |
| 1344 | IPI00319830.7 | Spnb2           | 1.20 | 0.83 | 0.11034 | 0.37683 |
| 1345 | IPI00314153.4 | Yars            | 0.80 | 0.99 | 0.11047 | 0.98022 |
| 1346 | IPI00129356.1 | Itsn1           | 0.80 | -    | 0.11077 | -       |
| 1347 | IPI00467571.1 | Mff             | 1.19 | 0.90 | 0.11258 | 0.53367 |
| 1348 | IPI00278804.1 | Scamp1          | 1.29 | -    | 0.11354 | -       |
| 1349 | IPI00121949.1 | Lanc12          | 1.21 | -    | 0.11395 | -       |

|      |                |                  |      |      |         |         |
|------|----------------|------------------|------|------|---------|---------|
| 1350 | IPI00858209.1  | Lanc12           | 1.21 | 0.99 | 0.11395 | 0.82481 |
| 1351 | IPI00458127.1  | Dbnl             | 1.50 | -    | 0.11395 | -       |
| 1352 | IPI00378015.1  | Dbnl             | 1.50 | 1.16 | 0.11395 | 0.73026 |
| 1353 | IPI00308222.3  | Dbnl             | 1.50 | -    | 0.11395 | -       |
| 1354 | IPI00461623.1  | Mat2a            | 1.41 | 0.85 | 0.11456 | 0.66501 |
| 1355 | IPI00347634.2  | Dnaja3           | 1.74 | 1.06 | 0.11456 | 0.71877 |
| 1356 | IPI00279858.1  | Dnaja3           | 1.74 | 1.04 | 0.11456 | -       |
| 1357 | IPI00120414.1  | Dnaja3           | 1.74 | -    | 0.11456 | -       |
| 1358 | IPI00228236.6  | Spcs2            | 0.53 | 1.12 | 0.11539 | 0.57476 |
| 1359 | IPI00153144.3  | Suox             | 1.57 | 1.42 | 0.11585 | 0.71877 |
| 1360 | IPI00831258.1  | Anp32b           | 1.94 | 1.30 | 0.11596 | 0.45615 |
| 1361 | IPI00113536.3  | Anp32b           | 1.94 | -    | 0.11596 | -       |
| 1362 | IPI00928150.1  | Kcnab2           | 2.56 | -    | 0.11602 | -       |
| 1363 | IPI00875244.1  | Cadm1            | 1.24 | -    | 0.11631 | -       |
| 1364 | IPI00322447.4  | Cadm1            | 1.24 | -    | 0.11631 | -       |
| 1365 | IPI00461967.2  | Cadm1            | 1.24 | -    | 0.11631 | -       |
| 1366 | IPI00626928.1  | Tmem65           | 1.45 | 1.14 | 0.11631 | 0.64574 |
| 1367 | IPI00309262.3  | Cdk5             | 1.18 | 0.98 | 0.11678 | 0.86896 |
| 1368 | IPI00119524.1  | Strn4            | 0.72 | -    | 0.11695 | -       |
| 1369 | IPI00607010.1  | Strn4            | 0.72 | 1.26 | 0.11695 | 0.45615 |
| 1370 | IPI00224069.3  | Exog             | 1.25 | 0.96 | 0.11695 | 0.85039 |
| 1371 | IPI00115833.2  | Mtap6            | 1.39 | 1.06 | 0.11695 | 0.53529 |
| 1372 | IPI00749947.1  | Cbx6-Nptxr;Cbx6; | 1.63 | 1.13 | 0.11695 | 0.45663 |
| 1373 | IPI00900461.1  | Sorbs2           | 1.63 | -    | 0.11695 | -       |
| 1374 | IPI00177047.10 | Sorbs2           | 1.63 | -    | 0.11695 | -       |
| 1375 | IPI00900398.1  | Sorbs2           | 1.63 | -    | 0.11695 | -       |
| 1376 | IPI00928280.1  | Sorbs2           | 1.63 | -    | 0.11695 | -       |
| 1377 | IPI00133518.2  | Cacnb3           | 1.58 | -    | 0.11712 | -       |
| 1378 | IPI00955148.1  | Chchd6           | 1.49 | -    | 0.11720 | -       |
| 1379 | IPI00313390.3  | Chchd6           | 1.49 | -    | 0.11720 | -       |
| 1380 | IPI00955145.1  | Chchd6           | 1.49 | 0.91 | 0.11720 | 0.62095 |
| 1381 | IPI00874402.1  | Chchd6           | 1.49 | 0.92 | 0.11720 | -       |
| 1382 | IPI00474497.1  | Gabrb3           | 2.12 | 0.82 | 0.11842 | 0.3937  |
| 1383 | IPI00130546.1  | Gabrb3           | 2.12 | -    | 0.11842 | -       |
| 1384 | IPI00856842.1  | Ociad1           | 1.42 | 0.99 | 0.11891 | -       |
| 1385 | IPI00466570.4  | Tmed10           | 0.83 | 1.13 | 0.11905 | 0.37683 |
| 1386 | IPI00133428.3  | Psmc1            | 1.43 | 1.00 | 0.11905 | 0.97544 |
| 1387 | IPI00874334.1  | Rimbp2           | 4.32 | 1.02 | 0.11905 | -       |
| 1388 | IPI00831651.2  | Rimbp2           | 4.32 | -    | 0.11905 | -       |
| 1389 | IPI00227832.8  | Clcn6            | 0.70 | -    | 0.11910 | -       |
| 1390 | IPI00121440.4  | Etfb             | 1.32 | 1.23 | 0.11910 | -       |
| 1391 | IPI00757916.1  | LOC100045699     | 1.32 | 1.07 | 0.11910 | 0.81988 |
| 1392 | IPI00848492.1  | LOC100045699     | 1.32 | -    | 0.11910 | -       |
| 1393 | IPI00320831.3  | Nbea             | 0.86 | -    | 0.11956 | -       |
| 1394 | IPI00469204.2  | Nbea             | 0.86 | 0.85 | 0.11956 | 0.35843 |
| 1395 | IPI00649885.3  | Acadvl           | 2.35 | 1.10 | 0.11956 | 0.61094 |
| 1396 | IPI00119203.4  | Acadvl           | 2.35 | -    | 0.11956 | -       |
| 1397 | IPI00341322.3  | Ndufb6           | 1.35 | 1.05 | 0.11993 | 0.5524  |
| 1398 | IPI00112126.1  | 1810027O10Rik    | 1.60 | 1.11 | 0.12119 | 0.76773 |
| 1399 | IPI00881320.1  | Brsk1            | 1.64 | -    | 0.12171 | -       |
| 1400 | IPI00515701.1  | Brsk1            | 1.64 | 0.82 | 0.12171 | -       |
| 1401 | IPI00515156.1  | Timm22           | 1.39 | 0.98 | 0.12240 | 0.96735 |

|      |               |                |       |      |         |         |   |
|------|---------------|----------------|-------|------|---------|---------|---|
| 1402 | IPI00315325.1 | Timm22         | 1.39  | 1.84 | 0.12240 | -       |   |
| 1403 | IPI00857793.1 | Snx3           | 0.80  | -    | 0.12247 | -       |   |
| 1404 | IPI00380220.2 | Ntrk3          | 1.40  | 0.81 | 0.12261 | 0.50968 |   |
| 1405 | IPI00117803.6 | Astn1          | 1.42  | -    | 0.12282 | -       |   |
| 1406 | IPI00321348.3 | Igsf8          | 1.19  | 0.89 | 0.12408 | 0.53529 |   |
| 1407 | IPI00404182.2 | Rhob           | 1.25  | 0.96 | 0.12408 | 0.8586  |   |
| 1408 | IPI00125266.1 | Asah1          | 1.29  | 1.07 | 0.12408 | 0.62108 |   |
| 1409 | IPI00808312.2 |                | 3-Sep | 1.72 | 1.08    | 0.12547 | - |
| 1410 | IPI00331516.3 | Dbn1           | 0.64  | -    | 0.12654 | -       |   |
| 1411 | IPI00551270.5 | Ttyh1          | 2.48  | -    | 0.12769 | -       |   |
| 1412 | IPI00420152.3 | Ttyh1          | 2.48  | 0.78 | 0.12769 | -       |   |
| 1413 | IPI00409360.3 | Acox1          | 0.72  | 0.90 | 0.12792 | -       |   |
| 1414 | IPI00459745.3 | Rap1gap        | 1.47  | -    | 0.12864 | -       |   |
| 1415 | IPI00127376.1 | Wdr54          | 2.23  | -    | 0.12984 | -       |   |
| 1416 | IPI00880278.1 | Wdr54          | 2.23  | 0.69 | 0.12984 | -       |   |
| 1417 | IPI00123295.2 | Fmn2           | 1.57  | -    | 0.13020 | -       |   |
| 1418 | IPI00120030.1 | Crym           | 1.24  | 0.89 | 0.13036 | 0.35616 |   |
| 1419 | IPI00420221.3 | Gm996          | 2.66  | -    | 0.13071 | -       |   |
| 1420 | IPI00112721.1 | Ppp1r1a        | 0.62  | 0.81 | 0.13078 | 0.70614 |   |
| 1421 | IPI00153840.2 | Cadm4          | 1.36  | 0.77 | 0.13114 | 0.37934 |   |
| 1422 | IPI00229992.1 | Plxn1          | 1.45  | 1.19 | 0.13114 | 0.84491 |   |
| 1423 | IPI00464335.4 | Psd            | 0.44  | 0.66 | 0.13161 | 0.36274 |   |
| 1424 | IPI00453826.2 | Matr3          | 0.59  | 1.11 | 0.13181 | 0.37995 |   |
| 1425 | IPI00319518.4 | Lonp1          | 1.37  | 1.12 | 0.13196 | -       |   |
| 1426 | IPI00761408.2 | Lonp1          | 1.37  | 1.12 | 0.13196 | 0.62548 |   |
| 1427 | IPI00129268.1 | Gng3           | 1.47  | 0.91 | 0.13227 | 0.74814 |   |
| 1428 | IPI00318841.4 | Eef1g          | 0.75  | 0.99 | 0.13318 | 0.96994 |   |
| 1429 | IPI00480321.2 | Grif1          | 0.77  | 0.85 | 0.13318 | 0.37995 |   |
| 1430 | IPI00828496.2 | Emd            | 0.77  | -    | 0.13333 | -       |   |
| 1431 | IPI00762814.3 | AU042671       | 0.53  | 0.99 | 0.13574 | 0.96853 |   |
| 1432 | IPI00230305.1 | Uqcc           | 1.33  | -    | 0.13699 | -       |   |
| 1433 | IPI00857713.1 | Uqcc           | 1.33  | -    | 0.13699 | -       |   |
| 1434 | IPI00857580.1 | Uqcc           | 1.33  | 1.28 | 0.13699 | 0.76754 |   |
| 1435 | IPI00858246.1 | Uqcc           | 1.33  | -    | 0.13699 | -       |   |
| 1436 | IPI00109603.1 | Uqcc           | 1.33  | -    | 0.13699 | -       |   |
| 1437 | IPI00858043.1 | Uqcc           | 1.33  | -    | 0.13699 | -       |   |
| 1438 | IPI00749564.1 | Uqcc           | 1.33  | -    | 0.13699 | -       |   |
| 1439 | IPI00108410.1 | Atad1          | 1.19  | 0.98 | 0.14030 | 0.87147 |   |
| 1440 | IPI00117083.1 | Grpel1         | 1.27  | 1.09 | 0.14038 | 0.53529 |   |
| 1441 | IPI00131843.3 | Ccdc127        | 1.43  | 1.11 | 0.14055 | 0.75519 |   |
| 1442 | IPI00331602.1 | Kcnb1          | 2.27  | 0.86 | 0.14055 | 0.54845 |   |
| 1443 | IPI00135596.1 | Kcnb1          | 2.27  | -    | 0.14055 | -       |   |
| 1444 | IPI00880400.1 | Rps2;Gm14583;G | 0.69  | 1.18 | 0.14112 | 0.31297 |   |
| 1445 | IPI00109482.3 | Ddah1          | 1.19  | 1.03 | 0.14116 | 0.86133 |   |
| 1446 | IPI00405462.5 | Sorbs2         | 1.83  | -    | 0.14116 | -       |   |
| 1447 | IPI00900438.1 | Sorbs2         | 1.83  | -    | 0.14116 | -       |   |
| 1448 | IPI00378681.6 | Ubr4           | 0.72  | -    | 0.14185 | -       |   |
| 1449 | IPI00648709.2 | Ubr4           | 0.72  | 0.88 | 0.14185 | 0.53754 |   |
| 1450 | IPI00845523.1 | Ubr4           | 0.72  | -    | 0.14185 | -       |   |
| 1451 | IPI00227392.5 | Ywhah          | 1.30  | 0.96 | 0.14185 | 0.8044  |   |
| 1452 | IPI00307991.1 | Crk            | 1.25  | -    | 0.14216 | -       |   |
| 1453 | IPI00881709.1 | Dpp6           | 2.00  | -    | 0.14216 | -       |   |

|      |                        |               |      |      |         |         |
|------|------------------------|---------------|------|------|---------|---------|
| 1454 | IPI00130389.3          | Dpp6          | 2.00 | -    | 0.14216 | -       |
| 1455 | IPI00762083.2          | Dpp6          | 2.00 | 0.82 | 0.14216 | 0.43034 |
| 1456 | IPI00955087.1          | Med12         | 1.27 | -    | 0.14245 | -       |
| 1457 | IPI00227168.2          | Nlgn3         | 1.27 | -    | 0.14245 | -       |
| 1458 | IPI00462803.5          | 6-Sep         | 1.24 | 1.06 | 0.14257 | 0.84365 |
| 1459 | IPI00120295.1          | Cldn11        | 0.80 | 0.86 | 0.14337 | 0.5524  |
| 1460 | IPI00120716.3          | Gnb1          | 1.20 | 0.96 | 0.14501 | 0.73026 |
| 1461 | IPI00317740.5          | Gnb2l1        | 0.69 | 1.10 | 0.14620 | 0.65064 |
| 1462 | IPI00880347.2          | Shisa7        | 2.43 | 0.86 | 0.14638 | 0.56614 |
| 1463 | IPI00396753.2          | Fam171a2      | 0.62 | 1.74 | 0.14672 | 0.71119 |
| 1464 | IPI00753905.3          | LOC100045876  | 0.52 | -    | 0.14722 | -       |
| 1465 | IPI00761360.1          | Gm6115        | 0.52 | -    | 0.14722 | -       |
| 1466 | IPI00135087.3          | Cops5         | 1.62 | 0.85 | 0.14823 | 0.43079 |
| 1467 | IPI00121271.1          | 0610011F06Rik | 2.39 | 1.02 | 0.14848 | -       |
| 1468 | IPI00113869.1          | Bsg           | 1.26 | -    | 0.14851 | -       |
| 1469 | contaminant_BASI_MOUSE |               | 1.26 | -    | 0.14851 | -       |
| 1470 | IPI00130733.3          | Dhodh         | 1.56 | 1.19 | 0.14885 | 0.47039 |
| 1471 | IPI00874846.3          | Ckap5         | 0.78 | -    | 0.14933 | -       |
| 1472 | IPI00317134.3          | Ckap5         | 0.78 | -    | 0.14933 | -       |
| 1473 | IPI00337930.4          | Ckap5         | 0.78 | 0.97 | 0.14933 | 0.76571 |
| 1474 | IPI00222549.6          | Rpl30;Gm8808  | 0.73 | -    | 0.14962 | -       |
| 1475 | IPI00463886.1          | Gm7429        | 0.73 | 1.07 | 0.14962 | 0.72276 |
| 1476 | IPI00553262.1          | mt-Nd6;mt-Nd5 | 1.38 | 1.01 | 0.14970 | 0.73565 |
| 1477 | IPI00480233.1          | mt-Nd6;mt-Nd5 | 1.38 | -    | 0.14970 | -       |
| 1478 | IPI00230124.5          | Fabp3         | 1.53 | -    | 0.14990 | -       |
| 1479 | IPI00606508.1          | Gm6139        | 0.63 | 0.94 | 0.15028 | -       |
| 1480 | IPI00928306.1          | Scamp1        | 1.23 | 1.00 | 0.15156 | 0.9987  |
| 1481 | IPI00221725.2          | Coro2b        | 1.39 | 1.08 | 0.15159 | 0.75733 |
| 1482 | IPI00135563.1          | Ncan          | 3.39 | 0.97 | 0.15302 | 0.84785 |
| 1483 | IPI00420651.3          | Ppp1r9b       | 1.34 | 0.80 | 0.15449 | 0.53638 |
| 1484 | IPI00453673.4          | Sik3          | 1.38 | -    | 0.15654 | -       |
| 1485 | IPI00881185.2          | Sik3          | 1.38 | -    | 0.15654 | -       |
| 1486 | IPI00881163.2          | Sik3          | 1.38 | 0.84 | 0.15654 | 0.54845 |
| 1487 | IPI00132575.3          | Cotl1         | 0.64 | 1.10 | 0.15734 | 0.6949  |
| 1488 | IPI00459493.5          | Tcp1          | 0.73 | 0.89 | 0.15797 | 0.5373  |
| 1489 | IPI00230141.1          | Acsl4         | 0.54 | -    | 0.15864 | -       |
| 1490 | IPI00331179.5          | Acsl4         | 0.54 | -    | 0.15864 | -       |
| 1491 | IPI00131701.1          | Acsl4         | 0.54 | -    | 0.15864 | -       |
| 1492 | IPI00411079.2          | Acsl4         | 0.54 | 1.15 | 0.15864 | 0.73026 |
| 1493 | IPI00669522.4          | Clasp1        | 0.77 | -    | 0.15864 | -       |
| 1494 | IPI00880482.1          | Clasp1        | 0.77 | -    | 0.15864 | -       |
| 1495 | IPI00754853.1          | Ptprs         | 1.24 | 0.88 | 0.15864 | 0.61297 |
| 1496 | IPI00943452.1          | Flot2         | 1.21 | -    | 0.16401 | -       |
| 1497 | IPI00943403.1          | Flot2         | 1.21 | -    | 0.16401 | -       |
| 1498 | IPI00754549.2          | Flot2         | 1.21 | 1.06 | 0.16401 | -       |
| 1499 | IPI00403266.3          | Flot2         | 1.21 | -    | 0.16401 | -       |
| 1500 | IPI00653398.1          | Flot2         | 1.21 | -    | 0.16401 | -       |
| 1501 | IPI00875821.1          | Sbf1          | 1.33 | 0.89 | 0.16618 | 0.37683 |
| 1502 | IPI00752390.4          | Sbf1          | 1.33 | -    | 0.16618 | -       |
| 1503 | IPI00132895.1          | Mrpl45        | 3.84 | 0.94 | 0.16664 | -       |
| 1504 | IPI00274186.8          | Arrb1         | 0.73 | 1.03 | 0.16930 | 0.70478 |
| 1505 | IPI00116498.1          | Ywhaz         | 1.13 | 0.94 | 0.16976 | 0.72722 |

|      |               |                |      |      |         |         |
|------|---------------|----------------|------|------|---------|---------|
| 1506 | IPI00221754.3 | Atl1           | 1.16 | 1.14 | 0.16984 | 0.31297 |
| 1507 | IPI00134344.6 | Spnb3          | 1.19 | 0.90 | 0.17006 | 0.56985 |
| 1508 | IPI00129362.1 | Fads2          | 0.53 | 1.29 | 0.17023 | 0.37683 |
| 1509 | IPI00421137.3 | Kif5c          | 0.70 | -    | 0.17026 | -       |
| 1510 | IPI00880589.1 | Auh            | 1.52 | -    | 0.17079 | -       |
| 1511 | IPI00275050.2 | Dap3           | 1.22 | 1.29 | 0.17093 | 0.49522 |
| 1512 | IPI00808096.3 | Mtap7d2        | 2.22 | 0.91 | 0.17167 | 0.84569 |
| 1513 | IPI00459177.6 | Mtap7d2        | 2.22 | -    | 0.17167 | -       |
| 1514 | IPI00749628.1 | Gm9104         | 0.62 | -    | 0.17177 | -       |
| 1515 | IPI00453771.2 | Ykt6           | 0.68 | 1.13 | 0.17200 | 0.57143 |
| 1516 | IPI00380280.3 | Cad            | 0.41 | -    | 0.17322 | -       |
| 1517 | IPI00830256.1 | Cad            | 0.41 | -    | 0.17322 | -       |
| 1518 | IPI00138406.1 | Rap1a          | 1.22 | 1.17 | 0.17330 | 0.37683 |
| 1519 | IPI00918848.1 | Inpp4a         | 1.20 | -    | 0.17368 | -       |
| 1520 | IPI00918922.1 | Inpp4a         | 1.20 | -    | 0.17368 | -       |
| 1521 | IPI00919003.1 | Inpp4a         | 1.20 | 0.95 | 0.17368 | -       |
| 1522 | IPI00919071.1 | Inpp4a         | 1.20 | -    | 0.17368 | -       |
| 1523 | IPI00224740.6 | Pfn1           | 1.14 | 1.00 | 0.17416 | 0.97461 |
| 1524 | IPI00623506.3 | Ank3           | 1.15 | 0.96 | 0.17416 | 0.85412 |
| 1525 | IPI00132412.3 | Mrpl10         | 1.30 | 0.82 | 0.17416 | 0.45615 |
| 1526 | IPI00135604.5 | Pcsk1n         | 0.83 | 0.98 | 0.17453 | 0.9326  |
| 1527 | IPI00272854.2 | Pgbd5          | 1.59 | 1.08 | 0.17487 | 0.54845 |
| 1528 | IPI00154047.1 | Hibch          | 1.25 | 1.08 | 0.17557 | 0.78265 |
| 1529 | IPI00885424.1 | Hibch          | 1.25 | -    | 0.17557 | -       |
| 1530 | IPI00459570.1 | Tpm3           | 0.69 | 0.92 | 0.17647 | -       |
| 1531 | IPI00322931.4 | Peci           | 1.21 | -    | 0.17647 | -       |
| 1532 | IPI00877214.1 | Peci           | 1.21 | 1.08 | 0.17647 | 0.85986 |
| 1533 | IPI00125397.1 | Slc30a3        | 4.08 | 1.07 | 0.17801 | 0.76671 |
| 1534 | IPI00323897.3 | Rab11a         | 0.72 | 1.17 | 0.17927 | 0.5772  |
| 1535 | IPI00132799.4 | C1qbp          | 1.15 | 1.08 | 0.17969 | 0.47039 |
| 1536 | IPI00885322.1 | Mllt4          | 0.47 | -    | 0.18065 | -       |
| 1537 | IPI00845596.1 | Mllt4          | 0.47 | -    | 0.18065 | -       |
| 1538 | IPI00853902.1 | Mllt4          | 0.47 | 0.93 | 0.18065 | 0.77388 |
| 1539 | IPI00224518.2 | Rab5c          | 1.24 | -    | 0.18067 | -       |
| 1540 | IPI00404579.1 | Rab5c          | 1.24 | 1.29 | 0.18067 | 0.63129 |
| 1541 | IPI00895387.1 | Bcat1          | 2.06 | -    | 0.18067 | -       |
| 1542 | IPI00762176.1 | Bcat1          | 2.06 | 0.87 | 0.18067 | 0.53529 |
| 1543 | IPI00875896.1 | Bcat1          | 2.06 | -    | 0.18067 | -       |
| 1544 | IPI00895538.1 | Bcat1          | 2.06 | -    | 0.18067 | -       |
| 1545 | IPI00131584.1 | Slc25a20       | 2.24 | 1.12 | 0.18147 | 0.72021 |
| 1546 | IPI00116558.1 | Rhog           | 2.33 | 0.92 | 0.18203 | 0.78833 |
| 1547 | IPI00849548.1 | LOC640369;Gm15 | 1.07 | 0.98 | 0.18332 | 0.94277 |
| 1548 | IPI00128986.1 | Tagln3         | 1.28 | 0.86 | 0.18415 | 0.48651 |
| 1549 | IPI00875117.1 | Crmp1          | 0.53 | 1.08 | 0.18445 | 0.78275 |
| 1550 | IPI00785371.2 | L1cam          | 0.85 | 0.86 | 0.18445 | 0.59994 |
| 1551 | IPI00139788.2 | Trf            | 1.41 | 0.93 | 0.18473 | 0.91716 |
| 1552 | IPI00649072.2 | LOC100044692   | 0.85 | -    | 0.18504 | -       |
| 1553 | IPI00874350.1 | Aldh3a2        | 1.19 | -    | 0.18504 | -       |
| 1554 | IPI00761984.1 | Aldh3a2        | 1.19 | 1.00 | 0.18504 | -       |
| 1555 | IPI00515370.1 | Aldh3a2        | 1.19 | -    | 0.18504 | -       |
| 1556 | IPI00112776.1 | Atp8a1         | 1.30 | -    | 0.18504 | -       |
| 1557 | IPI00132720.2 | Slc32a1        | 2.05 | -    | 0.18504 | -       |

|      |               |                |      |      |         |         |
|------|---------------|----------------|------|------|---------|---------|
| 1558 | IPI00221831.1 | Slc32a1        | 2.05 | 0.78 | 0.18504 | 0.47039 |
| 1559 | IPI00757372.2 | Isoc2a         | 1.38 | 0.94 | 0.18632 | 0.7605  |
| 1560 | IPI00471477.1 | Serbp1         | 0.60 | -    | 0.18638 | -       |
| 1561 | IPI00884509.1 | Serbp1         | 0.60 | 1.40 | 0.18638 | -       |
| 1562 | IPI00471476.1 | Serbp1         | 0.60 | -    | 0.18638 | -       |
| 1563 | IPI00471475.1 | Serbp1         | 0.60 | 1.18 | 0.18638 | -       |
| 1564 | IPI00113845.1 | Psmb1          | 1.13 | 1.13 | 0.18638 | 0.53529 |
| 1565 | IPI00895035.1 | Gria3          | 2.44 | 0.85 | 0.18638 | -       |
| 1566 | IPI00761666.2 | Vps13c         | 5.14 | -    | 0.18638 | -       |
| 1567 | IPI00473340.3 | Vps13c         | 5.14 | -    | 0.18638 | -       |
| 1568 | IPI00551411.5 | Vps13c         | 5.14 | 0.83 | 0.18638 | 0.63775 |
| 1569 | IPI00661059.2 | Vps13c         | 5.14 | 0.91 | 0.18638 | -       |
| 1570 | IPI00132208.1 | Dnaja1         | 0.73 | -    | 0.18649 | -       |
| 1571 | IPI00623518.2 | Gm7816         | 0.73 | 0.87 | 0.18649 | 0.40625 |
| 1572 | IPI00226414.7 | Abhd10         | 1.27 | -    | 0.18658 | -       |
| 1573 | IPI00404935.2 | Abhd10         | 1.27 | 0.68 | 0.18658 | -       |
| 1574 | IPI00648303.2 | Tmem11         | 1.29 | 1.17 | 0.18658 | 0.38642 |
| 1575 | IPI00222447.1 | Tmem11         | 1.29 | -    | 0.18658 | -       |
| 1576 | IPI00652056.1 | Mtdh           | 1.67 | -    | 0.18658 | -       |
| 1577 | IPI00130185.1 | Ppp1ca         | 1.13 | 0.92 | 0.18744 | 0.5754  |
| 1578 | IPI00121851.2 | Vbp1           | 0.70 | 0.83 | 0.18935 | 0.59894 |
| 1579 | IPI00129512.3 | Psmb4          | 1.31 | 0.96 | 0.18935 | 0.93586 |
| 1580 | IPI00623371.2 | Bcan           | 1.37 | -    | 0.18935 | -       |
| 1581 | IPI00869394.1 | Bcan           | 1.37 | 1.06 | 0.18935 | 0.76538 |
| 1582 | IPI00135857.3 | LOC545845;Gm85 | 1.66 | -    | 0.18935 | -       |
| 1583 | IPI00130589.8 | Sod1           | 1.66 | 0.95 | 0.18935 | 0.79634 |
| 1584 | IPI00108194.1 | Mrps26         | 1.32 | 1.19 | 0.19033 | 0.49165 |
| 1585 | IPI00308885.6 | Hspd1          | 1.17 | 1.01 | 0.19166 | 0.92141 |
| 1586 | IPI00406778.3 | L1cam          | 0.86 | -    | 0.19222 | -       |
| 1587 | IPI00928020.1 | Otub1          | 1.49 | 0.91 | 0.19222 | 0.6995  |
| 1588 | IPI00116192.1 | Prdx3          | 1.23 | 1.02 | 0.19240 | 0.87527 |
| 1589 | IPI00475302.2 | Camk2b         | 1.29 | -    | 0.19240 | -       |
| 1590 | IPI00470000.2 | Clstn1         | 1.42 | -    | 0.19240 | -       |
| 1591 | IPI00649216.1 | Clstn1         | 1.42 | -    | 0.19240 | -       |
| 1592 | IPI00620988.1 | Clstn1         | 1.42 | 1.09 | 0.19240 | 0.63407 |
| 1593 | IPI00895414.1 | -              | 1.43 | 0.87 | 0.19240 | 0.37683 |
| 1594 | IPI00649794.1 | Park7          | 1.43 | -    | 0.19240 | -       |
| 1595 | IPI00895518.1 | -              | 1.43 | -    | 0.19240 | -       |
| 1596 | IPI00894769.1 | -              | 1.43 | -    | 0.19240 | -       |
| 1597 | IPI00222049.1 | Neo1           | 0.35 | 0.83 | 0.19312 | 0.53529 |
| 1598 | IPI00621548.2 | Por            | 0.79 | 1.02 | 0.19346 | 0.82911 |
| 1599 | IPI00225264.3 | Eri3           | 0.52 | -    | 0.19562 | -       |
| 1600 | IPI00649884.2 | Eri3           | 0.52 | -    | 0.19562 | -       |
| 1601 | IPI00123519.6 | Arl6ip1        | 0.87 | 0.79 | 0.19593 | 0.7082  |
| 1602 | IPI00133451.2 | Scoc           | 0.69 | -    | 0.19675 | -       |
| 1603 | IPI00458011.5 | Gm16500        | 0.69 | 1.08 | 0.19675 | 0.88143 |
| 1604 | IPI00894942.1 | Scoc           | 0.69 | -    | 0.19675 | -       |
| 1605 | IPI00620834.2 | Scoc           | 0.69 | -    | 0.19675 | -       |
| 1606 | IPI00848537.1 | LOC100045253   | 0.69 | -    | 0.19675 | -       |
| 1607 | IPI00830896.1 | Nit1           | 1.71 | 1.00 | 0.19675 | -       |
| 1608 | IPI00128873.2 | Nit1           | 1.71 | -    | 0.19675 | -       |
| 1609 | IPI00407938.1 | Ociad1         | 1.36 | 0.97 | 0.19682 | -       |

|      |               |               |      |      |         |         |
|------|---------------|---------------|------|------|---------|---------|
| 1610 | IPI00876504.1 | Gstz1         | 2.18 | 0.97 | 0.19682 | 0.85883 |
| 1611 | IPI00126120.1 | Gstz1         | 2.18 | -    | 0.19682 | -       |
| 1612 | IPI00757186.1 | Mtch1         | 1.19 | -    | 0.20008 | -       |
| 1613 | IPI00137173.1 | Mtch1         | 1.19 | -    | 0.20008 | -       |
| 1614 | IPI00742287.1 | Mtch1         | 1.19 | 1.16 | 0.20008 | 0.5524  |
| 1615 | IPI00221932.1 | Mal2          | 2.07 | 0.92 | 0.20008 | 0.66898 |
| 1616 | IPI00890076.1 | Maoa          | 1.21 | 1.16 | 0.20035 | 0.37683 |
| 1617 | IPI00114560.5 | Rab1          | 1.27 | 1.05 | 0.20080 | 0.76194 |
| 1618 | IPI00229647.5 | Tln2          | 1.23 | 1.27 | 0.20291 | -       |
| 1619 | IPI00117896.3 | Mapre1        | 0.64 | 1.29 | 0.20338 | 0.39385 |
| 1620 | IPI00126913.5 | Atad3a        | 1.22 | 1.11 | 0.20370 | 0.63129 |
| 1621 | IPI00123129.1 | Snd1          | 0.81 | 1.28 | 0.20376 | 0.31297 |
| 1622 | IPI00762897.2 | Uggt1         | 0.82 | 1.10 | 0.20420 | 0.35616 |
| 1623 | IPI00458068.6 | Fkbp15        | 1.14 | -    | 0.20420 | -       |
| 1624 | IPI00929847.1 | Fkbp15        | 1.14 | 2.06 | 0.20420 | -       |
| 1625 | IPI00648460.3 | Cdc26;Fkbp15  | 1.14 | 1.02 | 0.20420 | -       |
| 1626 | IPI00416130.1 | Pex5l         | 2.00 | -    | 0.20467 | -       |
| 1627 | IPI00282186.3 | Pex5l         | 2.00 | 0.83 | 0.20467 | 0.44384 |
| 1628 | IPI00125412.1 | Pex5l         | 2.00 | -    | 0.20467 | -       |
| 1629 | IPI00857176.1 | Pex5l         | 2.00 | -    | 0.20467 | -       |
| 1630 | IPI00875944.1 | Pex5l         | 2.00 | 0.88 | 0.20467 | -       |
| 1631 | IPI00222723.1 | Pigk          | 0.69 | 1.05 | 0.20471 | 0.90659 |
| 1632 | IPI00111073.2 | Pigk          | 0.69 | -    | 0.20471 | -       |
| 1633 | IPI00226993.5 | Txn1          | 1.25 | 1.01 | 0.20471 | 0.96239 |
| 1634 | IPI00408119.6 | Mtap4         | 0.52 | -    | 0.20627 | -       |
| 1635 | IPI00624501.2 | Asna1         | 0.84 | 1.01 | 0.20696 | 0.98342 |
| 1636 | IPI00323483.3 | Pdcd6ip       | 1.83 | -    | 0.20746 | -       |
| 1637 | IPI00625588.1 |               | 1.17 | 1.20 | 0.20909 | 0.48898 |
| 1638 | IPI00620325.2 | Ndr4          | 0.77 | 1.00 | 0.20913 | 0.97801 |
| 1639 | IPI00165902.1 | Timm10;Timm13 | 1.24 | 1.19 | 0.20913 | 0.37683 |
| 1640 | IPI00338855.3 | Gstm3         | 1.41 | -    | 0.21007 | -       |
| 1641 | IPI00463891.1 | Gnas          | 1.21 | -    | 0.21020 | -       |
| 1642 | IPI00469793.3 | Gnas          | 1.21 | -    | 0.21020 | -       |
| 1643 | IPI00750570.1 | Gnas          | 1.21 | -    | 0.21020 | -       |
| 1644 | IPI00118899.1 | Actn4         | 1.64 | 0.93 | 0.21020 | 0.64484 |
| 1645 | IPI00468605.4 | Nlgn2         | 1.32 | 0.74 | 0.21021 | 0.38642 |
| 1646 | IPI00121514.3 | Stip1         | 1.21 | 0.89 | 0.21067 | 0.49522 |
| 1647 | IPI00124154.2 | Ndr4          | 0.76 | -    | 0.21120 | -       |
| 1648 | IPI00225031.4 | Ndr4          | 0.76 | 0.56 | 0.21120 | -       |
| 1649 | IPI00555004.3 | Adh5          | 0.81 | 1.01 | 0.21120 | 0.96421 |
| 1650 | IPI00129491.1 | Kcnd2         | 1.23 | 0.75 | 0.21170 | 0.64484 |
| 1651 | IPI00321734.7 | Glo1          | 1.29 | 0.96 | 0.21170 | 0.83947 |
| 1652 | IPI00114945.1 |               | 1.15 | 1.04 | 0.21204 | 0.84321 |
| 1653 | IPI00322312.3 | Arhgdia       | 1.25 | 0.93 | 0.21204 | 0.59066 |
| 1654 | IPI00877182.1 | Capza1        | 0.85 | -    | 0.21239 | -       |
| 1655 | IPI00330063.6 | Capza1        | 0.85 | -    | 0.21239 | -       |
| 1656 | IPI00848950.1 | Gm3608        | 0.85 | -    | 0.21239 | -       |
| 1657 | IPI00322156.1 | Slc38a3       | 1.22 | 0.94 | 0.21249 | 0.78275 |
| 1658 | IPI00223060.1 | Pck2          | 1.70 | 0.91 | 0.21275 | 0.75454 |
| 1659 | IPI00123783.2 | Odz3          | 0.47 | -    | 0.21359 | -       |
| 1660 | IPI00798466.1 | Odz3          | 0.47 | 1.00 | 0.21359 | 0.98022 |
| 1661 | IPI00830643.2 | Odz3          | 0.47 | -    | 0.21359 | -       |



|      |               |            |      |      |         |         |
|------|---------------|------------|------|------|---------|---------|
| 1662 | IPI00849793.1 | Rpl12      | 0.81 | 1.24 | 0.21359 | 0.44201 |
| 1663 | IPI00831038.1 | Gpm6b      | 2.24 | -    | 0.21359 | -       |
| 1664 | IPI00420590.3 | D3Bwg0562e | 1.43 | 0.77 | 0.21544 | 0.59331 |
| 1665 | IPI00111181.1 | Vps35      | 1.21 | 1.07 | 0.21620 | 0.65088 |
| 1666 | IPI00955696.1 | Gabrb2     | 1.57 | 0.58 | 0.21749 | 0.62562 |
| 1667 | IPI00137787.3 | Rpl8       | 0.75 | 0.95 | 0.21766 | 0.84785 |
| 1668 | IPI00137311.1 | Plxna1     | 0.71 | 0.78 | 0.21826 | 0.38574 |
| 1669 | IPI00131695.3 | Alb        | 1.17 | 1.36 | 0.21826 | 0.39089 |
| 1670 | IPI00381416.6 | Cdkl5      | 1.56 | 1.33 | 0.21833 | -       |
| 1671 | IPI00831130.1 | Glod4      | 0.75 | 0.73 | 0.21836 | -       |
| 1672 | IPI00112630.2 | Glod4      | 0.75 | -    | 0.21836 | -       |
| 1673 | IPI00110721.5 | Glod4      | 0.75 | 0.97 | 0.21836 | 0.81528 |
| 1674 | IPI00126042.3 | Rab14      | 1.15 | 1.08 | 0.21836 | 0.70016 |
| 1675 | IPI00404970.2 | Arhgap1    | 1.26 | 1.00 | 0.21898 | 0.98873 |
| 1676 | IPI00224070.2 | Arhgap1    | 1.26 | -    | 0.21898 | -       |
| 1677 | IPI00132410.1 | Rab5a      | 1.62 | 1.09 | 0.21898 | 0.74206 |
| 1678 | IPI00881222.1 | Lphn3      | 1.39 | -    | 0.22041 | -       |
| 1679 | IPI00619988.3 | Lphn3      | 1.39 | -    | 0.22041 | -       |
| 1680 | IPI00880426.1 | Lphn3      | 1.39 | -    | 0.22041 | -       |
| 1681 | IPI00880921.1 | Lphn3      | 1.39 | -    | 0.22041 | -       |
| 1682 | IPI00816972.2 | Lphn3      | 1.39 | -    | 0.22041 | -       |
| 1683 | IPI00816961.1 | Lphn3      | 1.39 | -    | 0.22041 | -       |
| 1684 | IPI00411157.4 | Lphn3      | 1.39 | -    | 0.22041 | -       |
| 1685 | IPI00881939.1 | Lphn3      | 1.39 | -    | 0.22041 | -       |
| 1686 | IPI00230283.5 | Gfm1       | 2.38 | 0.92 | 0.22041 | 0.70974 |
| 1687 | IPI00130883.1 | Rbm3       | 0.62 | -    | 0.22170 | -       |
| 1688 | IPI00378187.2 | Rbm3       | 0.62 | 1.33 | 0.22170 | 0.37683 |
| 1689 | IPI00121276.4 | Mecr       | 1.26 | 0.95 | 0.22176 | 0.35843 |
| 1690 | IPI00457668.1 | Scfd1      | 0.67 | 1.08 | 0.22286 | 0.71487 |
| 1691 | IPI00224219.1 | Scfd1      | 0.67 | -    | 0.22286 | -       |
| 1692 | IPI00928224.1 | Adcy3      | 2.77 | 0.74 | 0.22327 | 0.64948 |
| 1693 | IPI00929756.1 | Adcy3      | 2.77 | -    | 0.22327 | -       |
| 1694 | IPI00128323.3 | Adcy3      | 2.77 | -    | 0.22327 | -       |
| 1695 | IPI00918852.1 | Dhodh      | 1.46 | -    | 0.22346 | -       |
| 1696 | IPI00460653.2 | Abi2       | 0.74 | 1.03 | 0.22356 | 0.92141 |
| 1697 | IPI00380956.1 | Abi2       | 0.74 | -    | 0.22356 | -       |
| 1698 | IPI00221613.5 | Arf1       | 1.24 | 0.97 | 0.22441 | 0.72973 |
| 1699 | IPI00228583.5 | Mtpn       | 0.61 | 0.94 | 0.22480 | 0.81665 |
| 1700 | IPI00551443.2 | Brsk2      | 1.87 | -    | 0.22480 | -       |
| 1701 | IPI00134599.1 | Rps3       | 0.71 | 1.17 | 0.22493 | 0.35616 |
| 1702 | IPI00875406.1 | Ppp1ca     | 1.15 | -    | 0.22493 | -       |
| 1703 | IPI00230021.1 | Itpr1      | 1.71 | 0.93 | 0.22493 | 0.66916 |
| 1704 | IPI00474081.3 | Itpr1      | 1.71 | -    | 0.22493 | -       |
| 1705 | IPI00230023.1 | Itpr1      | 1.71 | -    | 0.22493 | -       |
| 1706 | IPI00134131.2 | Scp2       | 1.82 | -    | 0.22493 | -       |
| 1707 | IPI00554928.3 | Nefl       | 2.25 | 1.03 | 0.22493 | 0.9364  |
| 1708 | IPI00314191.6 | Cbr1       | 0.65 | 0.89 | 0.22538 | 0.54845 |
| 1709 | IPI00266188.6 | Cfl2       | 1.20 | 1.26 | 0.22624 | 0.73565 |
| 1710 | IPI00227585.6 | Fabp7      | 0.53 | 1.36 | 0.22827 | 0.54174 |
| 1711 | IPI00460662.1 | Sez6l2     | 0.62 | 1.13 | 0.22928 | 0.47039 |
| 1712 | IPI00754157.1 | -          | 0.72 | -    | 0.23041 | -       |
| 1713 | IPI00751485.1 | Gm16468    | 0.72 | 1.20 | 0.23041 | 0.5062  |

|      |               |                 |      |      |         |         |
|------|---------------|-----------------|------|------|---------|---------|
| 1714 | IPI00123199.1 | Nap11l          | 0.84 | -    | 0.23071 | -       |
| 1715 | IPI00929813.1 | Nap11l          | 0.84 | 0.93 | 0.23071 | 0.68765 |
| 1716 | IPI00274407.1 | Tufm            | 1.15 | 0.99 | 0.23071 | 0.97589 |
| 1717 | IPI00754509.1 | Agap2           | 1.46 | 0.71 | 0.23071 | 0.35616 |
| 1718 | IPI00349020.6 | Agap2           | 1.46 | -    | 0.23071 | -       |
| 1719 | IPI00112032.1 | Carkd           | 1.19 | -    | 0.23085 | -       |
| 1720 | IPI00894581.1 | Carkd           | 1.19 | 0.81 | 0.23085 | -       |
| 1721 | IPI00895023.1 | Carkd           | 1.19 | 0.90 | 0.23085 | 0.60491 |
| 1722 | IPI00316495.3 | Rab3c           | 2.67 | 0.98 | 0.23172 | 0.9364  |
| 1723 | IPI00403058.1 | Ganab           | 0.86 | 1.01 | 0.23219 | 0.92756 |
| 1724 | IPI00308149.1 | Ccny;LOC1000448 | 2.24 | -    | 0.23254 | -       |
| 1725 | IPI00471272.1 | LOC100044842;C  | 2.24 | 0.90 | 0.23254 | 0.7082  |
| 1726 | IPI00229762.6 | Usp30           | 1.19 | 1.22 | 0.23267 | 0.49522 |
| 1727 | IPI00953764.1 | Nlgn3           | 1.27 | 1.02 | 0.23267 | -       |
| 1728 | IPI00454159.1 | Cspg5           | 1.22 | -    | 0.23322 | -       |
| 1729 | IPI00223757.4 | Akr1b3          | 0.52 | 0.88 | 0.23354 | 0.47269 |
| 1730 | IPI00470138.4 | Lrrc40          | 0.61 | 0.95 | 0.23354 | -       |
| 1731 | IPI00466422.2 | Atp8a1          | 1.23 | 0.96 | 0.23354 | 0.85039 |
| 1732 | IPI00831373.1 | Atp8a1          | 1.23 | -    | 0.23354 | -       |
| 1733 | IPI00856692.1 | Dagla           | 1.68 | 0.78 | 0.23354 | 0.37995 |
| 1734 | IPI00377311.1 | Dagla           | 1.68 | -    | 0.23354 | -       |
| 1735 | IPI00169622.3 | Phyhip          | 5.23 | 0.88 | 0.23354 | 0.50085 |
| 1736 | IPI00471478.1 | Serbp1          | 0.58 | -    | 0.23359 | -       |
| 1737 | IPI00475256.2 | Gm13835         | 1.60 | 0.88 | 0.23376 | 0.52398 |
| 1738 | IPI00331644.5 | Psm3            | 1.60 | -    | 0.23376 | -       |
| 1739 | IPI00321744.3 | Ergic1          | 0.55 | 0.92 | 0.23515 | 0.84365 |
| 1740 | IPI00354363.3 | Gm6347          | 0.62 | 0.94 | 0.23516 | -       |
| 1741 | IPI00622160.3 | Gm16477         | 0.62 | -    | 0.23516 | -       |
| 1742 | IPI00330363.8 | Rpl7a;Gm8226    | 0.62 | -    | 0.23516 | -       |
| 1743 | IPI00109142.4 | Esd             | 1.50 | 0.75 | 0.23516 | 0.38642 |
| 1744 | IPI00125091.1 | Lasp1           | 1.87 | 1.06 | 0.23574 | 0.83146 |
| 1745 | IPI00758064.1 | Psmc3           | 1.48 | -    | 0.23575 | -       |
| 1746 | IPI00788392.1 | Traf3           | 1.64 | 0.87 | 0.23575 | -       |
| 1747 | IPI00310635.3 | Traf3           | 1.64 | -    | 0.23575 | -       |
| 1748 | IPI00896659.1 | Traf3           | 1.64 | 1.30 | 0.23575 | -       |
| 1749 | IPI00114399.1 | Rundc3a         | 1.37 | -    | 0.23765 | -       |
| 1750 | IPI00387392.4 | Slc25a46        | 1.51 | 1.05 | 0.23883 | 0.85426 |
| 1751 | IPI00322562.5 | Rps14           | 0.65 | 0.99 | 0.23926 | -       |
| 1752 | IPI00111117.5 | Arpc5l          | 1.37 | 1.06 | 0.23926 | 0.82481 |
| 1753 | IPI00225046.1 | Olfm1           | 2.00 | 0.92 | 0.23926 | 0.8044  |
| 1754 | IPI00136712.1 | Olfm1           | 2.00 | -    | 0.23926 | -       |
| 1755 | IPI00720005.1 | Olfm1           | 2.00 | -    | 0.23926 | -       |
| 1756 | IPI00128973.1 | Gap43           | 0.80 | 1.05 | 0.24001 | 0.88143 |
| 1757 | IPI00109672.3 | Yes1            | 0.62 | 1.15 | 0.24185 | 0.7202  |
| 1758 | IPI00315100.1 | Rhoa            | 1.22 | 0.88 | 0.24185 | 0.56985 |
| 1759 | IPI00454120.1 | Magi1           | 1.46 | -    | 0.24185 | -       |
| 1760 | IPI00471108.1 | Magi1           | 1.46 | 0.81 | 0.24185 | -       |
| 1761 | IPI00757349.3 | Magi1           | 1.46 | -    | 0.24185 | -       |
| 1762 | IPI00844720.1 | Magi1           | 1.46 | -    | 0.24185 | -       |
| 1763 | IPI00320836.1 | Nbea            | 0.88 | 0.73 | 0.24225 | -       |
| 1764 | IPI00900399.1 | Arhgap32        | 1.83 | 0.67 | 0.24485 | 0.35843 |
| 1765 | IPI00230277.3 | Mapk3           | 1.24 | 1.16 | 0.24602 | 0.39388 |

|      |                |                |      |      |         |         |
|------|----------------|----------------|------|------|---------|---------|
| 1766 | IPI00283862.6  | Psma1          | 1.30 | 0.91 | 0.24735 | 0.63713 |
| 1767 | IPI00127447.3  | Scarb2         | 0.72 | 1.13 | 0.24780 | 0.69116 |
| 1768 | IPI00130008.1  | Efnb3          | 0.50 | 0.96 | 0.24926 | -       |
| 1769 | IPI00117167.2  | Gsn            | 1.65 | -    | 0.24926 | -       |
| 1770 | IPI00759948.1  | Gsn            | 1.65 | 1.00 | 0.24926 | 0.98187 |
| 1771 | IPI00753326.1  | Kif5c          | 0.69 | 0.92 | 0.24963 | 0.74378 |
| 1772 | IPI00132531.1  | Ndufb5         | 1.29 | 1.01 | 0.25008 | 0.9364  |
| 1773 | IPI00652902.1  | Gnai2          | 1.17 | 0.88 | 0.25160 | 0.62519 |
| 1774 | IPI00853789.1  | LOC100046435   | 0.72 | -    | 0.25177 | -       |
| 1775 | IPI00125681.4  | Pigs           | 0.62 | 0.87 | 0.25234 | 0.45615 |
| 1776 | IPI00321308.4  | Aars           | 0.78 | 1.14 | 0.25285 | 0.45615 |
| 1777 | IPI00117168.3  | Dpy30          | 0.47 | 0.88 | 0.25346 | 0.67747 |
| 1778 | IPI00453803.5  | Ube2o          | 0.80 | -    | 0.25722 | -       |
| 1779 | IPI00875550.1  | Ube2o          | 0.80 | 0.97 | 0.25722 | 0.85988 |
| 1780 | IPI00153950.1  | Prpsap2        | 1.35 | -    | 0.25756 | -       |
| 1781 | IPI00944803.1  | Prpsap2        | 1.35 | 0.88 | 0.25756 | 0.49522 |
| 1782 | IPI00312174.6  | Ptges2         | 1.16 | -    | 0.25811 | -       |
| 1783 | IPI00947625.1  | Ptges2         | 1.16 | 1.04 | 0.25811 | 0.87817 |
| 1784 | IPI00875566.1  | Letmd1         | 1.32 | 1.08 | 0.25811 | 0.45615 |
| 1785 | IPI00874965.1  | Letmd1         | 1.32 | 1.33 | 0.25811 | -       |
| 1786 | IPI00125771.3  | Letmd1         | 1.32 | -    | 0.25811 | -       |
| 1787 | IPI00223325.5  | Gabbr1         | 1.65 | 0.83 | 0.25845 | -       |
| 1788 | IPI00135277.1  | Rbbp9;LOC67752 | 1.71 | 1.16 | 0.25845 | 0.47039 |
| 1789 | IPI00336291.6  | Tecpr1         | 1.28 | 1.24 | 0.25856 | -       |
| 1790 | IPI00894600.1  | Tecpr1         | 1.28 | 0.91 | 0.25856 | 0.86355 |
| 1791 | IPI00322145.10 | Ptplad1        | 1.11 | 1.08 | 0.26073 | 0.54716 |
| 1792 | IPI00468902.2  | Snx12          | 1.14 | -    | 0.26100 | -       |
| 1793 | IPI00762269.1  | Snx12          | 1.14 | 0.96 | 0.26100 | 0.91346 |
| 1794 | IPI00877355.1  | Snx12          | 1.14 | -    | 0.26100 | -       |
| 1795 | IPI00877268.1  | Snx12          | 1.14 | -    | 0.26100 | -       |
| 1796 | IPI00471107.1  | Magi1          | 1.36 | 0.82 | 0.26100 | 0.83229 |
| 1797 | IPI00626639.2  | Gm10095;LOC100 | 0.64 | -    | 0.26121 | -       |
| 1798 | IPI00664929.1  | Gm5816         | 0.64 | 1.33 | 0.26121 | -       |
| 1799 | IPI00606615.1  | Gm8054         | 0.64 | -    | 0.26121 | -       |
| 1800 | IPI00378437.3  | Gm5528         | 0.64 | -    | 0.26121 | -       |
| 1801 | IPI00273514.3  | Gm7806         | 0.64 | -    | 0.26121 | -       |
| 1802 | IPI00467197.5  | Gm10045        | 0.64 | -    | 0.26121 | -       |
| 1803 | IPI00114613.3  | Cdc42bpb       | 0.74 | 0.85 | 0.26121 | 0.41517 |
| 1804 | IPI00223437.4  | Copg           | 0.78 | 1.06 | 0.26121 | 0.79187 |
| 1805 | IPI00111235.2  | Aldh3a2        | 1.14 | 0.90 | 0.26121 | 0.47039 |
| 1806 | IPI00283511.1  | Pdxk           | 1.47 | 0.75 | 0.26121 | 0.38642 |
| 1807 | IPI00313222.5  | Rpl6           | 0.74 | -    | 0.26127 | -       |
| 1808 | IPI00626312.1  | Gm6136         | 0.74 | 1.11 | 0.26127 | 0.49522 |
| 1809 | IPI00606647.3  | Bcl2l13        | 1.22 | 1.16 | 0.26291 | 0.47039 |
| 1810 | IPI00317710.1  | Hspa4l         | 1.48 | -    | 0.26324 | -       |
| 1811 | IPI00120503.1  | Copb1          | 0.64 | 1.15 | 0.26344 | 0.38642 |
| 1812 | IPI00222037.3  | Mia3           | 0.73 | 1.57 | 0.26344 | -       |
| 1813 | IPI00118930.1  | Napa           | 1.30 | 1.01 | 0.26344 | 0.96907 |
| 1814 | IPI00123782.6  | Odz2           | 0.73 | -    | 0.26481 | -       |
| 1815 | IPI00649917.1  | Odz2           | 0.73 | 1.22 | 0.26481 | 0.78297 |
| 1816 | IPI00114667.1  | Psmc7          | 1.09 | 2.91 | 0.26481 | 0.74096 |
| 1817 | IPI00117264.1  | Park7          | 1.30 | -    | 0.26481 | -       |

|      |               |               |      |      |         |         |
|------|---------------|---------------|------|------|---------|---------|
| 1818 | IPI00649406.1 | Park7         | 1.30 | -    | 0.26481 | -       |
| 1819 | IPI00319135.4 | Surf1         | 1.90 | 0.98 | 0.26481 | 0.9548  |
| 1820 | IPI00322610.5 | Coasy         | 1.34 | 1.01 | 0.26503 | 0.98022 |
| 1821 | IPI00230441.2 | Vcan          | 1.19 | 1.11 | 0.26579 | 0.70951 |
| 1822 | IPI00469172.3 | Vcan          | 1.19 | -    | 0.26579 | -       |
| 1823 | IPI00113362.2 | Crkl          | 0.85 | 0.91 | 0.27098 | 0.69343 |
| 1824 | IPI00653423.2 | Bcat1         | 2.10 | -    | 0.27098 | -       |
| 1825 | IPI00857790.1 | Bcat1         | 2.10 | -    | 0.27098 | -       |
| 1826 | IPI00329953.1 | Stx7          | 0.61 | 1.42 | 0.27177 | 0.31297 |
| 1827 | IPI00118217.3 | Stx7          | 0.61 | -    | 0.27177 | -       |
| 1828 | IPI00915057.1 | AcsI3         | 0.79 | 0.90 | 0.27177 | -       |
| 1829 | IPI00153421.1 | Dync1li1      | 0.90 | 0.92 | 0.27177 | 0.55416 |
| 1830 | IPI00408495.1 | Bsg           | 1.16 | 0.81 | 0.27184 | 0.44201 |
| 1831 | IPI00462199.1 | Bsg           | 1.16 | -    | 0.27184 | -       |
| 1832 | IPI00880712.1 | Auh           | 1.26 | -    | 0.27213 | -       |
| 1833 | IPI00120590.3 | Kit           | 0.91 | -    | 0.27302 | -       |
| 1834 | IPI00754025.1 | Kit           | 0.91 | 0.88 | 0.27302 | -       |
| 1835 | IPI00468121.1 | Plcb1         | 1.10 | 0.92 | 0.27390 | 0.44339 |
| 1836 | IPI00123276.1 | Mosc2         | 1.34 | 0.98 | 0.27422 | 0.94207 |
| 1837 | IPI00890144.1 | Slc4a8        | 1.44 | 1.07 | 0.27422 | 0.8044  |
| 1838 | IPI00315879.1 | Cndp2         | 1.39 | -    | 0.27460 | -       |
| 1839 | IPI00816921.2 | Map6d1        | 2.48 | 1.36 | 0.27460 | 0.5009  |
| 1840 | IPI00311873.5 | Ppp1cb        | 1.12 | 0.89 | 0.27506 | 0.53529 |
| 1841 | IPI00314069.1 | Acot9         | 1.21 | 1.09 | 0.27538 | 0.5772  |
| 1842 | IPI00465812.2 | Epb4.1l1      | 0.87 | 0.77 | 0.27591 | -       |
| 1843 | IPI00137731.5 | Stam          | 1.40 | -    | 0.27648 | -       |
| 1844 | IPI00749697.1 | Stam          | 1.40 | 1.11 | 0.27648 | 0.47039 |
| 1845 | IPI00330122.2 | Fam5b         | 1.26 | 1.17 | 0.27652 | 0.84321 |
| 1846 | IPI00230003.7 | Pitpna        | 1.25 | 1.05 | 0.27664 | 0.77811 |
| 1847 | IPI00929894.1 | Mtor          | 1.33 | 0.92 | 0.27664 | 0.73026 |
| 1848 | IPI00268673.5 | Mtor          | 1.33 | -    | 0.27664 | -       |
| 1849 | IPI00776140.1 | Capzb         | 1.12 | -    | 0.27820 | -       |
| 1850 | IPI00474883.2 | Capzb         | 1.12 | 1.00 | 0.27820 | 0.97749 |
| 1851 | IPI00269481.7 | Capzb         | 1.12 | -    | 0.27820 | -       |
| 1852 | IPI00655177.1 | Pip5k1c       | 1.18 | 0.91 | 0.27820 | -       |
| 1853 | IPI00918347.1 | Pip5k1c       | 1.18 | -    | 0.27820 | -       |
| 1854 | IPI00857937.1 | Crk           | 1.20 | -    | 0.27820 | -       |
| 1855 | IPI00345994.2 | Crk           | 1.20 | 0.90 | 0.27820 | 0.49522 |
| 1856 | IPI00858058.1 | Crk           | 1.20 | -    | 0.27820 | -       |
| 1857 | IPI00118952.1 | 1500032L24Rik | 1.32 | 1.17 | 0.27820 | 0.35843 |
| 1858 | IPI00112001.1 | Cap2          | 2.72 | 0.87 | 0.27820 | 0.53529 |
| 1859 | IPI00955134.1 | Arpc4         | 1.89 | 1.01 | 0.27938 | 0.96041 |
| 1860 | IPI00138691.6 | Arpc4         | 1.89 | -    | 0.27938 | -       |
| 1861 | IPI00331064.7 | Cacna1e       | 2.41 | 0.80 | 0.28014 | 0.49522 |
| 1862 | IPI00331163.9 | Skp1a         | 1.15 | 0.91 | 0.28031 | 0.63836 |
| 1863 | IPI00123278.1 | Pycr2         | 1.30 | 1.06 | 0.28044 | 0.84785 |
| 1864 | IPI00468380.4 | Dclk1         | 0.78 | 1.19 | 0.28166 | 0.35687 |
| 1865 | IPI00454053.7 | 2010300C02Rik | 2.91 | 0.97 | 0.28209 | 0.97801 |
| 1866 | IPI00648235.1 | Nt5c3         | 0.84 | 0.80 | 0.28212 | 0.63274 |
| 1867 | IPI00187512.7 | Nt5c3         | 0.84 | -    | 0.28212 | -       |
| 1868 | IPI00113849.1 | Cdc42         | 1.21 | 0.91 | 0.28248 | 0.58379 |
| 1869 | IPI00311369.1 | Uchl3         | 2.81 | 1.62 | 0.28248 | -       |

|      |                        |                 |      |      |         |         |
|------|------------------------|-----------------|------|------|---------|---------|
| 1870 | IPI00405558.1          | Uchl3           | 2.81 | 0.93 | 0.28248 | -       |
| 1871 | IPI00108330.2          | Cnrip1          | 1.25 | 1.09 | 0.28370 | 0.5754  |
| 1872 | IPI00131407.1          | Psma5           | 1.12 | 0.94 | 0.28580 | 0.74914 |
| 1873 | IPI00678250.1          | Gm13125;Gm131   | 0.53 | 1.02 | 0.28603 | 0.95947 |
| 1874 | IPI00661192.2          | Gm6259          | 0.70 | -    | 0.28703 | -       |
| 1875 | IPI00753932.1          | -               | 0.70 | -    | 0.28703 | -       |
| 1876 | IPI00118632.1          | Gm11942         | 0.70 | 1.13 | 0.28703 | 0.47364 |
| 1877 | IPI00134920.3          | Gm10073         | 0.70 | -    | 0.28703 | -       |
| 1878 | IPI00136655.1          | Gcat            | 0.73 | 0.83 | 0.28703 | 0.74879 |
| 1879 | IPI00938462.1          | Gcat            | 0.73 | -    | 0.28703 | -       |
| 1880 | IPI00130988.1          | Dhcr7           | 0.76 | 0.96 | 0.28703 | -       |
| 1881 | IPI00857851.1          | Dhcr7           | 0.76 | -    | 0.28703 | -       |
| 1882 | IPI00622482.2          | Rufy3           | 0.77 | 1.00 | 0.28703 | 0.98187 |
| 1883 | IPI00848519.1          | LOC100039215    | 0.89 | 1.00 | 0.28703 | 0.98117 |
| 1884 | IPI00137296.1          | Tsnax;LOC100039 | 0.89 | -    | 0.28703 | -       |
| 1885 | IPI00881287.1          | Fkbp8           | 1.11 | 1.23 | 0.28703 | 0.5754  |
| 1886 | IPI00130833.3          | Fkbp8           | 1.11 | -    | 0.28703 | -       |
| 1887 | IPI00171974.1          | Chmp4b          | 1.15 | -    | 0.28703 | -       |
| 1888 | IPI00323016.2          | Ntng1           | 1.34 | -    | 0.28703 | -       |
| 1889 | IPI00465860.2          | Ntng1           | 1.34 | -    | 0.28703 | -       |
| 1890 | IPI00354771.2          | Ntng1           | 1.34 | -    | 0.28703 | -       |
| 1891 | IPI00323015.2          | Ntng1           | 1.34 | 0.79 | 0.28703 | 0.59331 |
| 1892 | IPI00742371.1          | Ntng1           | 1.34 | -    | 0.28703 | -       |
| 1893 | IPI00323012.2          | Ntng1           | 1.34 | -    | 0.28703 | -       |
| 1894 | IPI00354773.2          | Ntng1           | 1.34 | -    | 0.28703 | -       |
| 1895 | IPI00323017.2          | Ntng1           | 1.34 | -    | 0.28703 | -       |
| 1896 | IPI00354768.2          | Ntng1           | 1.34 | -    | 0.28703 | -       |
| 1897 | IPI00121833.3          | Acaa1a;Acaa1b   | 1.13 | 1.07 | 0.28844 | 0.76381 |
| 1898 | IPI00321978.3          | Ranbp1          | 0.70 | 1.08 | 0.28876 | -       |
| 1899 | IPI00136965.1          | Gria1           | 2.03 | 1.31 | 0.29087 | -       |
| 1900 | IPI00230665.2          | Ncam1           | 0.89 | 0.84 | 0.29159 | 0.54845 |
| 1901 | IPI00111218.1          | Aldh2           | 0.82 | 0.98 | 0.29245 | 0.8724  |
| 1902 | IPI00135869.3          | Rab11b          | 0.87 | 1.05 | 0.29245 | 0.8262  |
| 1903 | IPI00319992.1          | Hspa5           | 0.90 | -    | 0.29245 | -       |
| 1904 | contaminant_GR78_RAT   |                 | 0.90 | -    | 0.29245 | -       |
| 1905 | contaminant_GR78_MOUSE |                 | 0.90 | 1.11 | 0.29245 | 0.69126 |
| 1906 | IPI00415914.3          | Fbxo41          | 1.34 | 1.09 | 0.29245 | 0.85039 |
| 1907 | IPI00313962.3          | Uchl1           | 0.88 | 0.91 | 0.29372 | 0.63877 |
| 1908 | IPI00405121.6          | Unc13a          | 1.20 | 0.83 | 0.29467 | 0.49522 |
| 1909 | IPI00336313.2          | Ppp1r9a         | 1.33 | 1.08 | 0.29467 | -       |
| 1910 | IPI00125328.3          | Epb4.9          | 1.22 | -    | 0.29492 | -       |
| 1911 | IPI00620207.2          | Epb4.9          | 1.22 | 1.00 | 0.29492 | 0.99153 |
| 1912 | IPI00115679.1          | Ganab           | 0.87 | -    | 0.29737 | -       |
| 1913 | IPI00679159.2          | Gm9000          | 0.54 | -    | 0.29857 | -       |
| 1914 | IPI00473521.1          | Gm10119         | 0.54 | 1.07 | 0.29857 | 0.71027 |
| 1915 | IPI00331345.5          | Rps3a           | 0.54 | -    | 0.29857 | -       |
| 1916 | IPI00380780.7          | Ikbkap          | 0.70 | 0.81 | 0.29864 | 0.49522 |
| 1917 | IPI00343076.5          | Pcdh19          | 0.80 | -    | 0.30020 | -       |
| 1918 | IPI00867924.1          | Pcdh19          | 0.80 | -    | 0.30020 | -       |
| 1919 | IPI00750735.2          | Pcdh19          | 0.80 | -    | 0.30020 | -       |
| 1920 | IPI00108189.4          | Hint1           | 0.85 | 0.92 | 0.30020 | 0.79986 |
| 1921 | IPI00753915.2          | LOC674706       | 1.19 | 1.00 | 0.30020 | -       |

|      |               |               |      |      |         |         |
|------|---------------|---------------|------|------|---------|---------|
| 1922 | IPI00129198.1 | Epha4         | 1.24 | -    | 0.30020 | -       |
| 1923 | IPI00337992.1 | Epha4         | 1.24 | 0.87 | 0.30020 | -       |
| 1924 | IPI00230383.1 | Epha4         | 1.24 | 1.00 | 0.30020 | 1       |
| 1925 | IPI00274140.4 | Arhgap32      | 1.91 | -    | 0.30020 | -       |
| 1926 | IPI00225153.5 | Shisa7        | 2.24 | -    | 0.30032 | -       |
| 1927 | IPI00112335.1 | Map2k4        | 1.16 | 1.13 | 0.30085 | 0.53529 |
| 1928 | IPI00411109.4 | Caskin1       | 1.52 | -    | 0.30169 | -       |
| 1929 | IPI00408892.2 | Rab7          | 1.16 | 1.09 | 0.30340 | 0.49522 |
| 1930 | IPI00406118.1 | Syncrip       | 0.53 | 1.26 | 0.30425 | 0.38642 |
| 1931 | IPI00406117.1 | Syncrip       | 0.53 | -    | 0.30425 | -       |
| 1932 | IPI00321718.4 | Phb2          | 1.11 | 1.04 | 0.30540 | 0.8044  |
| 1933 | IPI00462006.3 | Gm16375       | 0.61 | -    | 0.30589 | -       |
| 1934 | IPI00265107.4 | Gm5044        | 0.61 | -    | 0.30589 | -       |
| 1935 | IPI00115157.2 | Snca          | 2.67 | -    | 0.30906 | -       |
| 1936 | IPI00849722.3 | Cadm1         | 1.22 | -    | 0.30923 | -       |
| 1937 | IPI00469251.5 | Txnrd1        | 0.73 | -    | 0.31077 | -       |
| 1938 | IPI00776252.1 | Txnrd1        | 0.73 | 0.94 | 0.31077 | 0.86916 |
| 1939 | IPI00830393.1 | Cops6         | 1.21 | 0.95 | 0.31100 | 0.76888 |
| 1940 | IPI00131873.1 | Cops6         | 1.21 | -    | 0.31100 | -       |
| 1941 | IPI00467854.1 | Clip2         | 0.50 | 0.83 | 0.31132 | 0.42933 |
| 1942 | IPI00662408.3 | 2010300C02Rik | 2.44 | 0.76 | 0.31132 | -       |
| 1943 | IPI00129178.1 | Oat           | 0.87 | 1.00 | 0.31211 | 0.98889 |
| 1944 | IPI00117630.3 | Itpr1         | 1.50 | -    | 0.31211 | -       |
| 1945 | IPI00469221.5 | Itpr1         | 1.50 | -    | 0.31211 | -       |
| 1946 | IPI00133208.3 | Hspa1l        | 1.17 | 0.95 | 0.31239 | 0.67208 |
| 1947 | IPI00323822.1 | Rras2         | 1.23 | 0.87 | 0.31266 | 0.86978 |
| 1948 | IPI00885251.1 | Camsap1       | 0.74 | 0.75 | 0.31338 | 0.35616 |
| 1949 | IPI00673777.2 | Camsap1       | 0.74 | -    | 0.31338 | -       |
| 1950 | IPI00132993.1 | Pak1          | 1.32 | 0.83 | 0.31349 | 0.53529 |
| 1951 | IPI00850420.1 | LOC100044883  | 2.19 | -    | 0.31362 | -       |
| 1952 | IPI00850126.2 | LOC100044883  | 2.19 | -    | 0.31362 | -       |
| 1953 | IPI00223621.1 | Mtap1s        | 0.77 | 0.94 | 0.31404 | 0.84491 |
| 1954 | IPI00762452.2 | Idh1          | 0.59 | 0.64 | 0.31555 | 0.60086 |
| 1955 | IPI00135231.2 | Idh1          | 0.59 | -    | 0.31555 | -       |
| 1956 | IPI00553792.1 | Caskin1       | 1.59 | 0.75 | 0.31555 | 0.36274 |
| 1957 | IPI00222113.2 | Cd99l2        | 1.76 | 0.77 | 0.31629 | -       |
| 1958 | IPI00153829.2 | Cd99l2        | 1.76 | -    | 0.31629 | -       |
| 1959 | IPI00776269.1 | Cd99l2        | 1.76 | -    | 0.31629 | -       |
| 1960 | IPI00407689.2 | Gabbr1        | 1.68 | -    | 0.31766 | -       |
| 1961 | IPI00755301.1 | Gabbr1        | 1.68 | -    | 0.31766 | -       |
| 1962 | IPI00223327.1 | Gabbr1        | 1.68 | -    | 0.31766 | -       |
| 1963 | IPI00153740.1 | Ahsa1         | 1.18 | 0.93 | 0.31807 | 0.52558 |
| 1964 | IPI00881945.1 | Tpm3          | 0.69 | -    | 0.31827 | -       |
| 1965 | IPI00461504.1 | Gm5445        | 0.62 | -    | 0.31889 | -       |
| 1966 | IPI00462005.1 | Gm5495        | 0.62 | -    | 0.31889 | -       |
| 1967 | IPI00404653.4 | -             | 0.62 | -    | 0.31889 | -       |
| 1968 | IPI00310220.3 | Gnb4          | 1.35 | 0.99 | 0.31977 | 0.9617  |
| 1969 | IPI00230019.1 | Itpr1         | 1.38 | -    | 0.31991 | -       |
| 1970 | IPI00330599.1 | Mtdh          | 1.22 | 1.29 | 0.32081 | 0.35616 |
| 1971 | IPI00120162.1 | Csnk2a1       | 1.05 | -    | 0.32259 | -       |
| 1972 | IPI00890345.1 | Wdr47         | 0.87 | 0.98 | 0.32367 | 0.91639 |
| 1973 | IPI00330193.3 | Wdr47         | 0.87 | -    | 0.32367 | -       |

|      |               |                |      |      |         |         |
|------|---------------|----------------|------|------|---------|---------|
| 1974 | IPI00121387.1 | Gna11          | 1.14 | 0.92 | 0.32367 | 0.74428 |
| 1975 | IPI00659932.4 | Grm5           | 0.66 | 0.56 | 0.32630 | 0.38642 |
| 1976 | IPI00553387.6 | Grm5           | 0.66 | -    | 0.32630 | -       |
| 1977 | IPI00403328.4 | Pip5k1c        | 1.18 | -    | 0.32630 | -       |
| 1978 | IPI00353887.4 | Ccdc109a       | 1.30 | -    | 0.32662 | -       |
| 1979 | IPI00270788.1 | 2310028O11Rik  | 1.23 | -    | 0.32828 | -       |
| 1980 | IPI00110224.1 | Hsd17b11       | 1.25 | 1.00 | 0.32883 | -       |
| 1981 | IPI00123494.3 | Psm2           | 1.09 | 1.00 | 0.32910 | 0.9364  |
| 1982 | IPI00122858.1 | Saps3          | 0.75 | -    | 0.32954 | -       |
| 1983 | IPI00719971.2 | Saps3          | 0.75 | 0.97 | 0.32954 | 0.9348  |
| 1984 | IPI00720007.1 | Saps3          | 0.75 | -    | 0.32954 | -       |
| 1985 | IPI00468685.2 | Gpr37l1        | 5.78 | 0.71 | 0.33029 | 0.44201 |
| 1986 | IPI00118723.3 | Ppp2r4         | 1.19 | 0.94 | 0.33294 | 0.80273 |
| 1987 | IPI00460063.2 | Pcyox1         | 1.10 | 1.03 | 0.33303 | 0.88143 |
| 1988 | IPI00133980.1 | Hcn2           | 1.29 | 0.79 | 0.33355 | 0.37683 |
| 1989 | IPI00604945.2 | Mpst           | 0.86 | 0.91 | 0.33372 | 0.5062  |
| 1990 | IPI00458105.2 | Gm12816        | 0.65 | -    | 0.33426 | -       |
| 1991 | IPI00170307.1 | Apoa1bp        | 1.18 | 0.95 | 0.33426 | 0.64944 |
| 1992 | IPI00118196.1 | Mrps5          | 1.23 | 1.17 | 0.33443 | 0.37683 |
| 1993 | IPI00169711.1 | Maoa           | 1.18 | -    | 0.33516 | -       |
| 1994 | IPI00318935.2 | 1810035L17Rik  | 0.62 | -    | 0.33562 | -       |
| 1995 | IPI00462115.3 | 1810035L17Rik  | 0.62 | 1.08 | 0.33562 | -       |
| 1996 | IPI00719866.1 | -              | 1.72 | -    | 0.33651 | -       |
| 1997 | IPI00551538.1 | Gm6421         | 1.72 | -    | 0.33651 | -       |
| 1998 | IPI00785343.2 | LOC100045490;H | 1.72 | -    | 0.33651 | -       |
| 1999 | IPI00886201.1 | -              | 1.72 | -    | 0.33651 | -       |
| 2000 | IPI00607069.1 | Gm10257        | 1.72 | 1.51 | 0.33651 | 0.35843 |
| 2001 | IPI00119876.1 | Dync1h1        | 0.91 | 0.96 | 0.33652 | 0.62701 |
| 2002 | IPI00831431.1 | Tpm1           | 1.27 | 0.97 | 0.33654 | 0.85988 |
| 2003 | IPI00830223.1 | Tpm1           | 1.27 | -    | 0.33654 | -       |
| 2004 | IPI00129685.2 | Gm14456;Tpt1   | 1.31 | 1.09 | 0.33654 | 0.44201 |
| 2005 | IPI00399498.2 | Nav1           | 0.67 | 0.87 | 0.33727 | 0.90457 |
| 2006 | IPI00128760.1 | Ube2l3         | 0.91 | 0.89 | 0.33738 | 0.53529 |
| 2007 | IPI00169699.4 | Rab12          | 1.40 | 1.07 | 0.33741 | 0.76004 |
| 2008 | IPI00130949.2 | Adcy1          | 0.85 | 0.87 | 0.33792 | 0.76574 |
| 2009 | IPI00650039.1 | Pfn1           | 1.12 | -    | 0.33792 | -       |
| 2010 | IPI00121079.3 | Cyb5r3         | 0.91 | -    | 0.33861 | -       |
| 2011 | IPI00759904.1 | Cyb5r3         | 0.91 | 1.06 | 0.33861 | 0.7558  |
| 2012 | IPI00885399.1 | 3110047P20Rik  | 0.87 | 0.79 | 0.33937 | 0.47487 |
| 2013 | IPI00118384.1 | Ywhae          | 0.89 | 0.93 | 0.33964 | 0.73565 |
| 2014 | IPI00624863.1 | Paics          | 0.63 | 0.86 | 0.34005 | 0.44852 |
| 2015 | IPI00322096.7 | Paics          | 0.63 | -    | 0.34005 | -       |
| 2016 | IPI00120232.1 | Ndufs7         | 1.26 | 1.09 | 0.34161 | 0.35616 |
| 2017 | IPI00356667.5 | Pcdh17         | 0.72 | 0.63 | 0.34165 | 0.66692 |
| 2018 | IPI00135130.3 | Slc1a4         | 0.90 | 0.89 | 0.34165 | 0.5772  |
| 2019 | IPI00760000.1 | Ywhab          | 1.07 | 0.93 | 0.34165 | 0.70307 |
| 2020 | IPI00230682.6 | Ywhab          | 1.07 | -    | 0.34165 | -       |
| 2021 | IPI00855176.2 | Pcdh9          | 1.70 | 0.67 | 0.34165 | -       |
| 2022 | IPI00113772.1 | Gabra1         | 2.09 | 0.83 | 0.34172 | 0.54013 |
| 2023 | IPI00844763.1 | Cask           | 1.14 | -    | 0.34173 | -       |
| 2024 | IPI00874660.1 | Srgap3         | 0.74 | -    | 0.34181 | -       |
| 2025 | IPI00874819.1 | Srgap3         | 0.74 | -    | 0.34181 | -       |

|      |               |                 |      |      |         |         |
|------|---------------|-----------------|------|------|---------|---------|
| 2026 | IPI00330039.3 | Srgap3          | 0.74 | -    | 0.34181 | -       |
| 2027 | IPI00408623.4 | Srgap3          | 0.74 | 0.72 | 0.34181 | 0.33373 |
| 2028 | IPI00221540.1 | Erlin2          | 0.81 | 1.02 | 0.34248 | 0.91252 |
| 2029 | IPI00281011.7 | Marcks1         | 0.20 | -    | 0.34274 | -       |
| 2030 | IPI00469539.1 | Car10           | 1.53 | -    | 0.34274 | -       |
| 2031 | IPI00411133.1 | Car10           | 1.53 | -    | 0.34274 | -       |
| 2032 | IPI00653841.1 | Capza1          | 0.87 | 1.00 | 0.34279 | 0.97982 |
| 2033 | IPI00230449.7 | Hpcal1          | 1.68 | 0.87 | 0.34285 | 0.67004 |
| 2034 | IPI00830653.1 | Clcn3           | 0.85 | -    | 0.34384 | -       |
| 2035 | IPI00830565.1 | Clcn3           | 0.85 | -    | 0.34384 | -       |
| 2036 | IPI00126619.1 | Clcn3           | 0.85 | -    | 0.34384 | -       |
| 2037 | IPI00170297.3 | Clcn3           | 0.85 | 1.07 | 0.34384 | 0.61385 |
| 2038 | IPI00281149.5 | Clcn3           | 0.85 | -    | 0.34384 | -       |
| 2039 | IPI00337980.5 | Rab21           | 1.13 | 1.09 | 0.34384 | 0.50543 |
| 2040 | IPI00128915.4 | Cspg4           | 0.74 | 1.23 | 0.34520 | -       |
| 2041 | IPI00831223.1 | Itsn1           | 0.86 | 0.90 | 0.34531 | 0.53529 |
| 2042 | IPI00130353.5 | Vars            | 0.88 | 1.01 | 0.34531 | 0.94277 |
| 2043 | IPI00117375.1 | Sdcbp           | 1.81 | -    | 0.34876 | -       |
| 2044 | IPI00648280.2 | Sdcbp           | 1.81 | 0.82 | 0.34876 | 0.47166 |
| 2045 | IPI00224151.5 | Ap1g1           | 1.16 | -    | 0.34884 | -       |
| 2046 | IPI00621460.2 | Ap1g1           | 1.16 | 1.17 | 0.34884 | 0.35616 |
| 2047 | IPI00467152.4 | Gnai1           | 1.13 | 0.79 | 0.35144 | 0.33373 |
| 2048 | IPI00830960.1 | Ptges3          | 0.81 | -    | 0.35601 | -       |
| 2049 | IPI00127989.1 | Ptges3;Gm9769;L | 0.81 | 0.90 | 0.35601 | 0.85986 |
| 2050 | IPI00153266.1 | Sccpdh          | 0.92 | 0.96 | 0.35601 | 0.73963 |
| 2051 | IPI00416906.2 | Gnas            | 1.15 | 0.98 | 0.35601 | 0.96979 |
| 2052 | IPI00798462.1 | Gnas            | 1.15 | -    | 0.35601 | -       |
| 2053 | IPI00119853.1 | Gnas            | 1.15 | -    | 0.35601 | -       |
| 2054 | IPI00315620.2 | Syt3            | 1.43 | 0.74 | 0.35601 | 0.45615 |
| 2055 | IPI00353563.4 | Fscn1           | 0.86 | 0.95 | 0.35721 | 0.67208 |
| 2056 | IPI00753025.1 | Ctnnb1          | 1.10 | 0.79 | 0.35721 | 0.37683 |
| 2057 | IPI00322828.1 | Farsb           | 0.71 | -    | 0.36314 | -       |
| 2058 | IPI00331443.3 | Farsb           | 0.71 | 1.19 | 0.36314 | 0.51296 |
| 2059 | IPI00130381.1 | Bat3            | 1.39 | 1.02 | 0.36356 | -       |
| 2060 | IPI00277446.5 | Bat3            | 1.39 | 0.85 | 0.36356 | 0.39385 |
| 2061 | IPI00221741.1 | Tipr1           | 0.66 | 1.02 | 0.36542 | 0.98154 |
| 2062 | IPI00882287.1 | Etfdh           | 1.54 | -    | 0.36605 | -       |
| 2063 | IPI00830314.1 | Sdr39u1         | 1.54 | 1.06 | 0.36621 | 0.62108 |
| 2064 | IPI00226521.5 | Sdr39u1         | 1.54 | -    | 0.36621 | -       |
| 2065 | IPI00407939.1 | Gria1           | 1.75 | 0.89 | 0.36621 | 0.37683 |
| 2066 | IPI00881090.1 | Hmox2           | 0.87 | 1.20 | 0.36731 | -       |
| 2067 | IPI00309322.3 | Hmox2           | 0.87 | 1.15 | 0.36731 | -       |
| 2068 | IPI00121038.2 | Vcan            | 1.47 | -    | 0.36740 | -       |
| 2069 | IPI00875672.1 | Vcan            | 1.47 | -    | 0.36740 | -       |
| 2070 | IPI00469565.3 | Vcan            | 1.47 | 1.01 | 0.36740 | -       |
| 2071 | IPI00880617.1 | Sec22b          | 0.86 | 1.11 | 0.36749 | 0.54434 |
| 2072 | IPI00114368.3 | Sec22b          | 0.86 | -    | 0.36749 | -       |
| 2073 | IPI00228617.6 | Gnai2           | 1.13 | -    | 0.36749 | -       |
| 2074 | IPI00120085.1 | Tprgl           | 1.20 | 0.92 | 0.36749 | 0.85925 |
| 2075 | IPI00117632.2 | Wdr6            | 0.60 | -    | 0.36852 | -       |
| 2076 | IPI00742334.1 | Kpnb1           | 0.83 | 0.93 | 0.36896 | 0.59331 |
| 2077 | IPI00461212.1 | Osbpl8          | 1.54 | -    | 0.36926 | -       |



|      |               |                 |      |      |         |         |
|------|---------------|-----------------|------|------|---------|---------|
| 2078 | IPI00323442.8 | Slc4a8          | 1.41 | -    | 0.37142 | -       |
| 2079 | IPI00170387.1 | Cpne5           | 0.89 | -    | 0.37272 | -       |
| 2080 | IPI00848924.1 | LOC100048828    | 0.89 | 0.84 | 0.37272 | 0.79785 |
| 2081 | IPI00133249.1 | Surf4           | 0.77 | 1.01 | 0.37465 | 0.96496 |
| 2082 | IPI00659608.4 | Efha2           | 1.28 | 1.10 | 0.37465 | 0.5765  |
| 2083 | IPI00554989.3 | Ppia            | 0.92 | 0.91 | 0.37547 | 0.58965 |
| 2084 | IPI00875081.1 | Mtmr1           | 1.44 | 0.73 | 0.37617 | 0.53529 |
| 2085 | IPI00131028.2 | Mtmr1           | 1.44 | -    | 0.37617 | -       |
| 2086 | IPI00224570.3 | Prkar2b         | 0.91 | 0.83 | 0.37856 | 0.37683 |
| 2087 | IPI00454049.4 | Echs1           | 1.13 | 1.01 | 0.37922 | 0.94454 |
| 2088 | IPI00118821.2 | Pafah1b2        | 0.83 | 0.82 | 0.38068 | 0.37995 |
| 2089 | IPI00137313.2 | Plxna2          | 0.88 | 0.56 | 0.38071 | 0.70016 |
| 2090 | IPI00113517.1 | Ctsb            | 1.53 | 1.12 | 0.38304 | 0.47039 |
| 2091 | IPI00230539.1 | Grb2            | 1.10 | -    | 0.38327 | -       |
| 2092 | IPI00323881.1 | Kpnb1           | 0.81 | -    | 0.38336 | -       |
| 2093 | IPI00798441.1 | Odz4            | 1.33 | -    | 0.38349 | -       |
| 2094 | IPI00157497.8 | Odz4            | 1.33 | -    | 0.38349 | -       |
| 2095 | IPI00798616.1 | Odz4            | 1.33 | -    | 0.38349 | -       |
| 2096 | IPI00754819.3 | Odz4            | 1.33 | 0.97 | 0.38349 | 0.92872 |
| 2097 | IPI00230193.7 | Gnaz            | 1.22 | 1.00 | 0.38428 | 0.98798 |
| 2098 | IPI00120715.1 | LOC100044630;Tt | 1.24 | 0.99 | 0.38504 | -       |
| 2099 | IPI00848992.1 | LOC100047515    | 0.83 | -    | 0.38630 | -       |
| 2100 | IPI00153813.4 | Exoc1           | 0.83 | 0.75 | 0.38630 | -       |
| 2101 | IPI00670735.1 | LOC677317       | 0.69 | -    | 0.38633 | -       |
| 2102 | IPI00881197.1 | Me1             | 0.69 | 0.95 | 0.38633 | 0.75245 |
| 2103 | IPI00113895.1 | Actr1a          | 0.93 | 0.91 | 0.38633 | 0.50316 |
| 2104 | IPI00420554.2 | Cntnap2         | 1.26 | 0.60 | 0.38633 | 0.50346 |
| 2105 | IPI00315135.3 | Tomm22          | 1.15 | 1.08 | 0.38882 | 0.6949  |
| 2106 | IPI00351252.4 | Gmps            | 1.51 | 1.09 | 0.39055 | 0.64484 |
| 2107 | IPI00266899.6 | Fkbp1a          | 1.92 | 0.93 | 0.39094 | 0.71743 |
| 2108 | IPI00309997.3 | Fhl1            | 1.31 | -    | 0.39296 | -       |
| 2109 | IPI00776352.1 | Fhl1            | 1.31 | -    | 0.39296 | -       |
| 2110 | IPI00775790.1 | Fhl1            | 1.31 | -    | 0.39296 | -       |
| 2111 | IPI00848600.1 | LOC100047480    | 0.74 | 1.31 | 0.39391 | -       |
| 2112 | IPI00454035.2 | Fam125b         | 0.74 | -    | 0.39391 | -       |
| 2113 | IPI00115627.4 | Actr3           | 0.92 | 1.00 | 0.39391 | 1       |
| 2114 | IPI00830581.1 | Hsd17b10        | 1.28 | 1.01 | 0.39391 | 0.90457 |
| 2115 | IPI00626132.3 | Hsd17b10        | 1.28 | -    | 0.39391 | -       |
| 2116 | IPI00110850.1 | Actb            | 0.90 | -    | 0.39411 | -       |
| 2117 | IPI00125267.4 | Vapa            | 0.90 | 1.06 | 0.39476 | 0.54174 |
| 2118 | IPI00224575.1 | Hnrnpk          | 0.94 | 0.96 | 0.39476 | 0.61123 |
| 2119 | IPI00223253.1 | Hnrnpk          | 0.94 | -    | 0.39476 | -       |
| 2120 | IPI00918799.1 | Abi1            | 1.20 | -    | 0.39688 | -       |
| 2121 | IPI00918951.1 | Abi1            | 1.20 | -    | 0.39688 | -       |
| 2122 | IPI00659927.2 | Abi1            | 1.20 | -    | 0.39688 | -       |
| 2123 | IPI00918813.1 | Abi1            | 1.20 | -    | 0.39688 | -       |
| 2124 | IPI00919052.1 | Abi1            | 1.20 | -    | 0.39688 | -       |
| 2125 | IPI00454179.3 | Abi1            | 1.20 | -    | 0.39688 | -       |
| 2126 | IPI00653749.3 | Abi1            | 1.20 | -    | 0.39688 | -       |
| 2127 | IPI00551347.4 | Abi1            | 1.20 | 0.88 | 0.39688 | 0.64484 |
| 2128 | IPI00798483.1 | Abi1            | 1.20 | -    | 0.39688 | -       |
| 2129 | IPI00918718.1 | Abi1            | 1.20 | -    | 0.39688 | -       |

|      |                |                 |      |      |         |         |
|------|----------------|-----------------|------|------|---------|---------|
| 2130 | IPI00317711.1  | Hspa4l          | 1.48 | 0.91 | 0.39688 | 0.70416 |
| 2131 | IPI00890007.1  | Akap1           | 0.52 | -    | 0.39726 | -       |
| 2132 | IPI00894854.1  | Akap1           | 0.52 | 0.60 | 0.39726 | -       |
| 2133 | IPI00830335.1  | Capns1          | 1.22 | 0.72 | 0.40126 | -       |
| 2134 | IPI00129276.2  | Eif3a           | 0.78 | 1.15 | 0.40246 | 0.39089 |
| 2135 | IPI00137336.1  | Gpc1            | 1.09 | 0.86 | 0.40246 | 0.37683 |
| 2136 | IPI00135971.1  | Tjp1            | 1.30 | 0.69 | 0.40246 | -       |
| 2137 | IPI00944062.1  | Tjp1            | 1.30 | 0.80 | 0.40246 | -       |
| 2138 | IPI00874522.1  | Tjp1            | 1.30 | 0.95 | 0.40246 | -       |
| 2139 | IPI00882206.1  | Ndrg4           | 0.83 | -    | 0.40294 | -       |
| 2140 | IPI00221528.1  | Actbl2          | 0.90 | 0.92 | 0.40410 | -       |
| 2141 | IPI00265471.2  | Adsl            | 0.58 | -    | 0.40505 | -       |
| 2142 | IPI00308217.1  | Adsl            | 0.58 | 1.02 | 0.40505 | 0.98873 |
| 2143 | IPI00857969.1  | Dync1i1         | 0.80 | -    | 0.40505 | -       |
| 2144 | IPI00226946.2  | Dync1i1         | 0.80 | 0.84 | 0.40505 | 0.66898 |
| 2145 | IPI00851092.2  | Kalrn           | 0.68 | -    | 0.40597 | -       |
| 2146 | IPI00848608.1  | Kalrn           | 0.68 | 0.81 | 0.40597 | -       |
| 2147 | IPI00229599.2  | Nav1            | 0.71 | -    | 0.40597 | -       |
| 2148 | IPI00131287.2  | Necab2          | 1.44 | 1.12 | 0.40657 | 0.76538 |
| 2149 | IPI00336807.4  | Gpd1l           | 1.08 | 1.00 | 0.40909 | 0.98187 |
| 2150 | IPI00415908.4  | Ppme1           | 1.25 | 1.14 | 0.40997 | 0.60542 |
| 2151 | IPI00131845.1  | Psma6           | 1.07 | 0.92 | 0.41057 | 0.73026 |
| 2152 | IPI00127135.2  | Kif2a           | 0.65 | 0.94 | 0.41086 | -       |
| 2153 | IPI00867847.1  | Kif2a           | 0.65 | -    | 0.41086 | -       |
| 2154 | IPI00881982.1  | Kif2a           | 0.65 | -    | 0.41086 | -       |
| 2155 | IPI00876029.1  | Arf4            | 1.12 | 1.01 | 0.41086 | 0.89384 |
| 2156 | IPI00331663.18 | Arf4            | 1.12 | -    | 0.41086 | -       |
| 2157 | IPI00228059.4  | Pgm2l1          | 1.22 | 0.92 | 0.41146 | 0.73026 |
| 2158 | IPI00857248.1  | Dync1i1         | 0.75 | -    | 0.41181 | -       |
| 2159 | IPI00753815.3  | Spna2           | 1.15 | 0.82 | 0.41258 | -       |
| 2160 | IPI00466128.3  | Akr1a4          | 0.89 | 0.97 | 0.41389 | 0.87413 |
| 2161 | IPI00313558.4  | Arcn1           | 2.27 | -    | 0.41472 | -       |
| 2162 | IPI00849044.2  | Arcn1           | 2.27 | 1.16 | 0.41472 | 0.49522 |
| 2163 | IPI00648312.3  | Nt5dc3          | 1.14 | 0.96 | 0.41485 | 0.86251 |
| 2164 | IPI00403860.6  | Nrxn1           | 0.88 | -    | 0.41598 | -       |
| 2165 | IPI00230051.2  | Nrxn1           | 0.88 | 0.93 | 0.41598 | 0.79565 |
| 2166 | IPI00230050.2  | Nrxn1           | 0.88 | -    | 0.41598 | -       |
| 2167 | IPI00468539.3  | Nrxn1           | 0.88 | -    | 0.41598 | -       |
| 2168 | IPI00139795.2  | Rplp2           | 0.88 | 1.24 | 0.41598 | 0.31297 |
| 2169 | IPI00400432.2  | Eif4a2          | 1.09 | -    | 0.41598 | -       |
| 2170 | IPI00409918.1  | Eif4a2          | 1.09 | 1.14 | 0.41598 | 0.38642 |
| 2171 | IPI00857127.1  | Eif4a2          | 1.12 | -    | 0.41598 | -       |
| 2172 | IPI00281761.3  | Prnt2           | 1.15 | 0.81 | 0.41598 | 0.48497 |
| 2173 | IPI00226387.3  | Pgam5           | 1.23 | 1.06 | 0.41598 | -       |
| 2174 | IPI00121338.1  | Aplp2           | 1.57 | -    | 0.41645 | -       |
| 2175 | IPI00266699.1  | Aplp2           | 1.57 | -    | 0.41645 | -       |
| 2176 | IPI00133421.3  | Aplp2           | 1.57 | 0.99 | 0.41645 | 0.9364  |
| 2177 | IPI00555023.2  | Gstp1           | 0.86 | 0.83 | 0.42050 | 0.37683 |
| 2178 | IPI00661338.1  | Bckdhhb;LOC1000 | 1.18 | 1.04 | 0.42217 | 0.80758 |
| 2179 | IPI00115977.1  | Me2             | 1.25 | 1.04 | 0.42217 | 0.76773 |
| 2180 | IPI00469338.4  | Agpat3          | 1.35 | 1.10 | 0.42217 | 0.68311 |
| 2181 | IPI00849959.1  | Etl4            | 2.67 | -    | 0.42217 | -       |

|      |               |                |      |      |         |         |
|------|---------------|----------------|------|------|---------|---------|
| 2182 | IPI00411164.4 | Etl4           | 2.67 | -    | 0.42217 | -       |
| 2183 | IPI00754456.3 | Etl4           | 2.67 | -    | 0.42217 | -       |
| 2184 | IPI00752398.1 | Etl4           | 2.67 | -    | 0.42217 | -       |
| 2185 | IPI00553590.2 | Etl4           | 2.67 | 0.76 | 0.42217 | 0.51296 |
| 2186 | IPI00756087.2 | Etl4           | 2.67 | -    | 0.42217 | -       |
| 2187 | IPI00754975.1 | Etl4           | 2.67 | -    | 0.42217 | -       |
| 2188 | IPI00113386.1 | Ethe1          | 1.26 | 1.07 | 0.42220 | 0.76109 |
| 2189 | IPI00462453.4 | Gm5619         | 0.61 | -    | 0.42278 | -       |
| 2190 | IPI00118880.5 | Gucy1b3        | 0.85 | -    | 0.42306 | -       |
| 2191 | IPI00653283.1 | Gucy1b3        | 0.85 | 0.75 | 0.42306 | 0.35843 |
| 2192 | IPI00395038.3 | Xpo1           | 1.21 | 1.08 | 0.42306 | 0.54013 |
| 2193 | IPI00845556.1 | Mia3           | 0.73 | 1.21 | 0.42414 | -       |
| 2194 | IPI00230020.3 | Itpr1          | 1.50 | -    | 0.42494 | -       |
| 2195 | IPI00223759.2 | Vps26b         | 1.18 | 1.12 | 0.42658 | 0.49522 |
| 2196 | IPI00750061.1 | Gsk3b          | 0.88 | 0.88 | 0.43013 | 0.5342  |
| 2197 | IPI00471176.2 | Hepacam        | 1.50 | 0.87 | 0.43129 | 0.57271 |
| 2198 | IPI00380130.2 | Rps2           | 0.75 | -    | 0.43164 | -       |
| 2199 | IPI00606379.2 | Gm5786         | 0.75 | -    | 0.43164 | -       |
| 2200 | IPI00604967.3 | Gm16408        | 0.75 | -    | 0.43164 | -       |
| 2201 | IPI00387557.3 | Actn2          | 1.43 | 0.93 | 0.43252 | 0.60679 |
| 2202 | IPI00395178.1 | Abr            | 1.20 | -    | 0.43569 | -       |
| 2203 | IPI00395177.1 | Abr            | 1.20 | 0.90 | 0.43569 | 0.63364 |
| 2204 | IPI00381365.1 | Abr            | 1.20 | -    | 0.43569 | -       |
| 2205 | IPI00515365.4 | Abr            | 1.20 | -    | 0.43569 | -       |
| 2206 | IPI00515151.2 | Nipsnap1       | 1.28 | 1.01 | 0.43569 | 0.94277 |
| 2207 | IPI00321922.2 | Pacs1          | 1.26 | 0.99 | 0.43890 | 0.97788 |
| 2208 | IPI00776240.1 | Trim2          | 0.74 | 1.02 | 0.43927 | 0.87475 |
| 2209 | IPI00776324.1 | Trim2          | 0.74 | -    | 0.43927 | -       |
| 2210 | IPI00113430.1 | Trim2          | 0.74 | -    | 0.43927 | -       |
| 2211 | IPI00310240.4 | Anxa6          | 1.45 | -    | 0.43956 | -       |
| 2212 | IPI00466672.3 | Cacna1b        | 1.25 | 0.86 | 0.44111 | 0.68323 |
| 2213 | IPI00750241.1 | Cacna1b        | 1.25 | -    | 0.44111 | -       |
| 2214 | IPI00115062.3 | Cacna1b        | 1.25 | -    | 0.44111 | -       |
| 2215 | IPI00625414.2 | Cacna1b        | 1.25 | -    | 0.44111 | -       |
| 2216 | IPI00122971.2 | Ncam1          | 0.86 | 0.84 | 0.44408 | 0.42216 |
| 2217 | IPI00678003.1 | Itpa           | 1.23 | 0.94 | 0.44635 | 0.77205 |
| 2218 | IPI00116228.1 | Ppif           | 2.90 | 0.82 | 0.44660 | 0.66498 |
| 2219 | IPI00229534.5 | Marcks         | 0.70 | 1.17 | 0.44729 | 0.49522 |
| 2220 | IPI00625061.2 | Mark3          | 0.80 | -    | 0.44855 | -       |
| 2221 | IPI00312620.7 | Mark3          | 0.80 | 0.88 | 0.44855 | 0.54845 |
| 2222 | IPI00279494.6 | Mark3          | 0.80 | -    | 0.44855 | -       |
| 2223 | IPI00955735.1 | Exog           | 1.16 | -    | 0.45009 | -       |
| 2224 | IPI00875177.1 | Gm8225         | 0.68 | -    | 0.45170 | -       |
| 2225 | IPI00667471.1 | Ppp2r2a        | 1.27 | 0.78 | 0.45170 | 0.48497 |
| 2226 | IPI00228358.1 | Gabrg2         | 0.67 | 1.08 | 0.45204 | 0.91346 |
| 2227 | IPI00874658.1 | Gabrg2         | 0.67 | 1.24 | 0.45204 | -       |
| 2228 | IPI00132194.3 | Aimp1          | 1.19 | 0.94 | 0.45432 | 0.75685 |
| 2229 | IPI00720066.1 | Saps3          | 0.85 | -    | 0.45446 | -       |
| 2230 | IPI00124286.2 | Ap3m2          | 1.22 | 0.98 | 0.45469 | 0.94699 |
| 2231 | IPI00118193.1 | Mrps18b        | 1.06 | -    | 0.45537 | -       |
| 2232 | IPI00131459.1 | Nme1;LOC100046 | 0.91 | 0.99 | 0.45692 | 0.96735 |
| 2233 | IPI00125513.1 | Timm9          | 1.35 | 1.32 | 0.45716 | 0.39831 |

|      |                        |                 |      |      |         |         |
|------|------------------------|-----------------|------|------|---------|---------|
| 2234 | IPI00111320.7          | Snx27           | 0.72 | -    | 0.45896 | -       |
| 2235 | IPI00756736.2          | Snx27           | 0.72 | 1.17 | 0.45896 | 0.6493  |
| 2236 | IPI00667117.2          | Dbi             | 0.92 | 0.85 | 0.45896 | 0.5499  |
| 2237 | IPI00831604.1          | Dbi             | 0.92 | -    | 0.45896 | -       |
| 2238 | IPI00222430.5          | Dbi             | 0.92 | -    | 0.45896 | -       |
| 2239 | contaminant_GR78_HUMAN |                 | 0.92 | -    | 0.45896 | -       |
| 2240 | IPI00263638.8          | Ncald           | 1.19 | 0.98 | 0.45973 | -       |
| 2241 | IPI00121319.1          | Crip2           | 0.76 | 1.07 | 0.46049 | 0.79785 |
| 2242 | IPI00230018.1          | Itpr1           | 1.38 | 0.86 | 0.46187 | -       |
| 2243 | IPI00130158.3          | Ipo9            | 0.68 | -    | 0.46291 | -       |
| 2244 | IPI00673797.2          | Ipo9            | 0.68 | 0.91 | 0.46291 | 0.73026 |
| 2245 | IPI00133270.1          | Clpp            | 1.08 | 1.11 | 0.46422 | 0.57476 |
| 2246 | IPI00676293.3          | Srgap2          | 0.74 | 1.15 | 0.46502 | 0.71318 |
| 2247 | IPI00752849.2          | Sec31a          | 0.84 | -    | 0.46552 | -       |
| 2248 | IPI00380338.1          | Igsf21          | 1.33 | 0.76 | 0.46790 | 0.37683 |
| 2249 | IPI00857723.1          | Cttnbp2         | 1.58 | -    | 0.46790 | -       |
| 2250 | IPI00408957.3          | Sugt1           | 1.18 | 1.10 | 0.46861 | 0.5524  |
| 2251 | IPI00453615.3          | Huwe1           | 1.14 | 0.72 | 0.46900 | -       |
| 2252 | IPI00653007.1          | Actc1           | 0.89 | 0.98 | 0.47090 | 0.86133 |
| 2253 | IPI00224505.7          | Gm15710;Rpl13;c | 0.43 | 1.18 | 0.47511 | -       |
| 2254 | IPI00890196.1          | -               | 0.43 | -    | 0.47511 | -       |
| 2255 | IPI00653474.1          | Rpl13           | 0.43 | 1.26 | 0.47511 | 0.53529 |
| 2256 | IPI00113073.3          | Aldh1b1         | 1.16 | 1.09 | 0.47732 | 0.70478 |
| 2257 | IPI00869375.1          | Gas7            | 0.82 | -    | 0.47742 | -       |
| 2258 | IPI00869450.1          | Gas7            | 0.82 | 0.82 | 0.47742 | 0.35843 |
| 2259 | IPI00336844.1          | Epn2            | 1.47 | -    | 0.47841 | -       |
| 2260 | IPI00400174.1          | Epn2            | 1.47 | 1.05 | 0.47841 | -       |
| 2261 | IPI00395193.1          | Rtn1            | 0.87 | 0.98 | 0.48012 | 0.83858 |
| 2262 | IPI00116563.2          | Rab5b           | 1.04 | -    | 0.48012 | -       |
| 2263 | IPI00133167.1          | Magmas;Gm9803   | 1.31 | 0.90 | 0.48034 | 0.72371 |
| 2264 | IPI00115094.1          | Bckdk           | 1.39 | 0.93 | 0.48315 | -       |
| 2265 | IPI00136246.1          | Pitpnm1         | 1.42 | 1.01 | 0.48363 | 0.99153 |
| 2266 | IPI00380998.3          | Gm16416         | 0.62 | -    | 0.48374 | -       |
| 2267 | IPI00757792.1          | -               | 0.62 | -    | 0.48374 | -       |
| 2268 | IPI00890245.1          | -               | 0.62 | -    | 0.48374 | -       |
| 2269 | IPI00460090.5          | Gm6919          | 0.62 | -    | 0.48374 | -       |
| 2270 | IPI00751831.1          | Gm7555          | 0.62 | -    | 0.48374 | -       |
| 2271 | IPI00407707.2          | -               | 0.62 | -    | 0.48374 | -       |
| 2272 | IPI00331444.7          | Ipo7            | 0.90 | 0.91 | 0.48374 | 0.38642 |
| 2273 | IPI00655218.1          | Pip5k1c         | 1.17 | 0.93 | 0.48374 | 0.91716 |
| 2274 | IPI00112986.1          | Bcs1l           | 1.20 | 0.95 | 0.48420 | 0.83082 |
| 2275 | IPI00776053.1          | Dync1i2         | 0.80 | -    | 0.48562 | -       |
| 2276 | IPI00653072.1          | Dync1i2         | 0.80 | -    | 0.48562 | -       |
| 2277 | IPI00776018.1          | Dync1i2         | 0.80 | 0.95 | 0.48562 | 0.95427 |
| 2278 | IPI00856469.1          | Spnb4;Shkbp1    | 1.19 | 0.88 | 0.48562 | 0.39453 |
| 2279 | IPI00265864.3          | Tollip          | 1.63 | 0.90 | 0.48614 | 0.77811 |
| 2280 | IPI00136618.1          | Tollip          | 1.63 | -    | 0.48614 | -       |
| 2281 | IPI00131376.5          | Spnb1           | 1.23 | 1.09 | 0.48657 | 0.67961 |
| 2282 | IPI00123802.5          | Hsph1           | 0.87 | -    | 0.48833 | -       |
| 2283 | IPI00126759.6          | Lrrc8a          | 1.08 | 1.04 | 0.48930 | 0.94077 |
| 2284 | IPI00113262.1          | Psmc14          | 1.11 | 1.11 | 0.49195 | 0.73729 |
| 2285 | IPI00828513.1          | Psmc4           | 0.86 | 1.21 | 0.49311 | 0.33373 |

|      |               |               |      |      |         |         |
|------|---------------|---------------|------|------|---------|---------|
| 2286 | IPI00405459.2 | Ngef          | 1.24 | 0.93 | 0.49332 | 0.74096 |
| 2287 | IPI00229725.2 | Ngef          | 1.24 | -    | 0.49332 | -       |
| 2288 | IPI00648918.3 | Myo18a        | 1.12 | -    | 0.49661 | -       |
| 2289 | IPI00649326.2 | Myo18a        | 1.12 | -    | 0.49661 | -       |
| 2290 | IPI00622556.4 | Myo18a        | 1.12 | 0.99 | 0.49661 | 0.95528 |
| 2291 | IPI00619995.4 | Myo18a        | 1.12 | 0.78 | 0.49661 | -       |
| 2292 | IPI00331146.5 | Cmpk1         | 1.19 | 0.95 | 0.49661 | 0.79606 |
| 2293 | IPI00849947.1 | LOC100047588  | 0.75 | -    | 0.49680 | -       |
| 2294 | IPI00626620.2 | Sec24c        | 1.41 | 1.00 | 0.49680 | 0.99013 |
| 2295 | IPI00229483.4 | Sec24c        | 1.41 | -    | 0.49680 | -       |
| 2296 | IPI00112446.1 | Scg3          | 0.85 | -    | 0.49726 | -       |
| 2297 | IPI00944768.1 | Scg3          | 0.85 | 1.13 | 0.49726 | 0.76773 |
| 2298 | IPI00108454.2 | -             | 0.86 | -    | 0.49807 | -       |
| 2299 | IPI00474622.1 | Gm16409       | 0.86 | -    | 0.49807 | -       |
| 2300 | IPI00113655.1 | Rps6;Gm13654  | 0.86 | 1.25 | 0.49807 | 0.37683 |
| 2301 | IPI00671512.3 | Gm16406       | 0.86 | -    | 0.49807 | -       |
| 2302 | IPI00651798.1 | Acsl3         | 0.88 | 1.01 | 0.49807 | 0.90942 |
| 2303 | IPI00169772.2 | Acsl3         | 0.88 | -    | 0.49807 | -       |
| 2304 | IPI00153468.1 | Tmed4         | 0.85 | -    | 0.49876 | -       |
| 2305 | IPI00226430.2 | Acaa2         | 1.10 | -    | 0.49876 | -       |
| 2306 | IPI00653158.1 | Acaa2         | 1.10 | 0.95 | 0.49876 | 0.8719  |
| 2307 | IPI00955167.1 | Mars          | 1.16 | 1.05 | 0.49876 | 0.73026 |
| 2308 | IPI00461469.3 | Mars          | 1.16 | -    | 0.49876 | -       |
| 2309 | IPI00875864.1 | Rcn2          | 1.20 | 1.05 | 0.49876 | 0.73026 |
| 2310 | IPI00474959.2 | Rcn2          | 1.20 | -    | 0.49876 | -       |
| 2311 | IPI00129107.1 | Gipc1         | 1.50 | 1.23 | 0.49917 | 0.76773 |
| 2312 | IPI00762636.2 | Acsf3         | 1.21 | 1.00 | 0.50227 | 0.9797  |
| 2313 | IPI00125899.1 | Ctnnb1        | 1.07 | -    | 0.50258 | -       |
| 2314 | IPI00409255.2 | D030016E14Rik | 1.35 | 0.91 | 0.50465 | -       |
| 2315 | IPI00922963.1 | Map4k4        | 0.37 | -    | 0.50539 | -       |
| 2316 | IPI00308077.6 | Enpp6         | 1.18 | 1.02 | 0.50663 | 0.8841  |
| 2317 | IPI00886258.1 | Enpp6         | 1.18 | -    | 0.50663 | -       |
| 2318 | IPI00314439.3 | Psm3          | 1.18 | -    | 0.50680 | -       |
| 2319 | IPI00652694.1 | Psm3          | 1.18 | 0.85 | 0.50680 | 0.53529 |
| 2320 | IPI00131954.1 | D17Wsu104e    | 0.85 | 0.95 | 0.50692 | 0.82911 |
| 2321 | IPI00848482.1 | Fry           | 0.68 | 0.94 | 0.50869 | 0.82671 |
| 2322 | IPI00134961.1 | Acadm         | 1.21 | 0.98 | 0.50869 | 0.93627 |
| 2323 | IPI00136984.1 | Rps7          | 0.84 | 1.13 | 0.50912 | 0.53529 |
| 2324 | IPI00127987.1 | Arpc1a        | 1.10 | 1.00 | 0.51077 | 0.98022 |
| 2325 | IPI00131870.3 | Cops3         | 1.11 | 0.70 | 0.51267 | -       |
| 2326 | IPI00126072.2 | Vat1          | 0.67 | 1.01 | 0.51316 | 0.95795 |
| 2327 | IPI00471372.2 | Wasf1         | 1.14 | 0.89 | 0.51534 | 0.38074 |
| 2328 | IPI00222632.3 | Rab31         | 0.91 | 0.90 | 0.52010 | 0.80738 |
| 2329 | IPI00308938.6 | Capn2         | 0.79 | 0.93 | 0.52396 | 0.78265 |
| 2330 | IPI00880411.1 | Tfg           | 1.18 | 0.95 | 0.52675 | -       |
| 2331 | IPI00126048.2 | Psm3          | 1.09 | 1.05 | 0.52886 | 0.85039 |
| 2332 | IPI00844784.1 | Psm3          | 1.09 | -    | 0.52886 | -       |
| 2333 | IPI00230690.1 | Dst           | 1.22 | 0.86 | 0.53193 | -       |
| 2334 | IPI00762553.2 | Dst           | 1.22 | -    | 0.53193 | -       |
| 2335 | IPI00874675.1 | Dst           | 1.22 | -    | 0.53193 | -       |
| 2336 | IPI00230689.3 | Dst           | 1.22 | -    | 0.53193 | -       |
| 2337 | IPI00284272.1 | Dst           | 1.22 | -    | 0.53193 | -       |

|      |               |                   |      |      |         |         |
|------|---------------|-------------------|------|------|---------|---------|
| 2338 | IPI00874946.1 | Dst               | 1.22 | 1.00 | 0.53193 | -       |
| 2339 | IPI00230692.1 | Dst               | 1.22 | -    | 0.53193 | -       |
| 2340 | IPI00125319.1 | Gsk3b             | 0.89 | -    | 0.53418 | -       |
| 2341 | IPI00853967.1 | Pthr2             | 0.88 | 1.22 | 0.53465 | 0.43985 |
| 2342 | IPI00153702.2 | Pthr2             | 0.88 | -    | 0.53465 | -       |
| 2343 | IPI00754524.1 | LOC100047530      | 1.12 | 0.89 | 0.53726 | -       |
| 2344 | IPI00828654.2 | Wnk2              | 0.63 | -    | 0.53938 | -       |
| 2345 | IPI00828980.1 | Wnk2              | 0.63 | -    | 0.53938 | -       |
| 2346 | IPI00828549.1 | Wnk2              | 0.63 | -    | 0.53938 | -       |
| 2347 | IPI00653345.2 | Wnk2              | 0.63 | -    | 0.53938 | -       |
| 2348 | IPI00355244.8 | Wnk2              | 0.63 | -    | 0.53938 | -       |
| 2349 | IPI00408595.4 | Wnk2              | 0.63 | 0.61 | 0.53938 | -       |
| 2350 | IPI00828738.1 | Wnk2              | 0.63 | -    | 0.53938 | -       |
| 2351 | IPI00623951.3 | Hist2h2ab;Hist2h. | 1.22 | 0.96 | 0.53938 | 0.87469 |
| 2352 | IPI00469012.3 | Tbc1d10b          | 0.84 | 0.97 | 0.53983 | 0.89442 |
| 2353 | IPI00118569.1 | Gna13             | 0.40 | 0.97 | 0.54102 | 0.77607 |
| 2354 | IPI00652888.1 | Itpa              | 1.34 | -    | 0.54102 | -       |
| 2355 | IPI00314829.5 | Nln               | 0.81 | -    | 0.54214 | -       |
| 2356 | IPI00127707.1 | Pcbp2             | 0.84 | -    | 0.54435 | -       |
| 2357 | IPI00221799.1 | Pcbp2             | 0.84 | 1.08 | 0.54435 | -       |
| 2358 | IPI00162780.3 | Gnb2              | 1.11 | -    | 0.54552 | -       |
| 2359 | IPI00128947.1 | Pitpnm2           | 1.20 | -    | 0.54812 | -       |
| 2360 | IPI00754562.1 | Pitpnm2           | 1.20 | 1.07 | 0.54812 | 0.73241 |
| 2361 | IPI00927967.1 | Pitpnm2           | 1.20 | -    | 0.54812 | -       |
| 2362 | IPI00230589.1 | Akap1             | 0.55 | -    | 0.54912 | -       |
| 2363 | IPI00230593.1 | Akap1             | 0.55 | -    | 0.54912 | -       |
| 2364 | IPI00115506.1 | Akap1             | 0.55 | -    | 0.54912 | -       |
| 2365 | IPI00230592.1 | Akap1             | 0.55 | -    | 0.54912 | -       |
| 2366 | IPI00230591.1 | Akap1             | 0.55 | -    | 0.54912 | -       |
| 2367 | IPI00230590.1 | Akap1             | 0.55 | -    | 0.54912 | -       |
| 2368 | IPI00463573.3 | Eif3l             | 0.76 | 0.64 | 0.54912 | 0.71595 |
| 2369 | IPI00404055.5 | Ank2              | 0.89 | 0.91 | 0.54912 | -       |
| 2370 | IPI00177038.1 | Actr2             | 1.12 | 0.98 | 0.54912 | 0.7214  |
| 2371 | IPI00120193.1 | Cdc42             | 1.12 | 0.95 | 0.55084 | 0.59365 |
| 2372 | IPI00125497.3 | Ptgfrn            | 0.39 | -    | 0.55249 | -       |
| 2373 | IPI00515319.2 | Ptgfrn            | 0.39 | -    | 0.55249 | -       |
| 2374 | IPI00830990.2 | Pak3              | 0.81 | -    | 0.55256 | -       |
| 2375 | IPI00262114.1 | Pak3              | 0.81 | -    | 0.55256 | -       |
| 2376 | IPI00411094.1 | Pak3              | 0.81 | 0.84 | 0.55256 | -       |
| 2377 | IPI00875924.1 | Dnpep             | 0.76 | 1.06 | 0.55638 | 0.74093 |
| 2378 | IPI00331394.3 | Dnpep             | 0.76 | -    | 0.55638 | -       |
| 2379 | IPI00853924.1 | Ywhaq             | 0.94 | -    | 0.55638 | -       |
| 2380 | IPI00162932.1 | Abcb9             | 1.24 | 1.29 | 0.55638 | 0.38012 |
| 2381 | IPI00319652.2 | Gpx1              | 0.89 | 0.92 | 0.55717 | 0.76381 |
| 2382 | IPI00119667.1 | Eef1a2            | 1.13 | 1.07 | 0.55717 | 0.48364 |
| 2383 | IPI00273801.3 | Slc39a10          | 1.32 | 0.84 | 0.55717 | -       |
| 2384 | IPI00830206.1 | Slc39a10          | 1.32 | -    | 0.55717 | -       |
| 2385 | IPI00556688.1 | Dctn4             | 1.09 | 0.82 | 0.55781 | 0.45615 |
| 2386 | IPI00113214.1 | Usp5              | 1.08 | 1.02 | 0.56125 | -       |
| 2387 | IPI00881918.1 | Usp5              | 1.08 | 1.04 | 0.56125 | 0.97078 |
| 2388 | IPI00137227.1 | Rab2a             | 1.09 | 1.06 | 0.56125 | 0.75733 |
| 2389 | IPI00469236.2 | Lpgat1            | 1.11 | -    | 0.56125 | -       |

|      |               |                  |      |      |         |         |
|------|---------------|------------------|------|------|---------|---------|
| 2390 | IPI00654342.2 | Lpgat1           | 1.11 | 1.01 | 0.56125 | 0.96857 |
| 2391 | IPI00118380.2 | Grin2a           | 1.73 | 0.67 | 0.56125 | 0.39155 |
| 2392 | IPI00313151.3 | Dpysl4           | 1.12 | -    | 0.56181 | -       |
| 2393 | IPI00895996.1 | Dpysl4           | 1.12 | -    | 0.56181 | -       |
| 2394 | IPI00845581.1 | Dpysl4           | 1.12 | 1.14 | 0.56181 | 0.41875 |
| 2395 | IPI00229845.3 | Prmt5            | 1.25 | 0.49 | 0.56181 | -       |
| 2396 | IPI00775797.1 | Trim3            | 0.86 | 0.88 | 0.56237 | 0.75691 |
| 2397 | IPI00129020.1 | Trim3            | 0.86 | -    | 0.56237 | -       |
| 2398 | IPI00227235.4 | Ank2             | 0.92 | 0.82 | 0.56584 | 0.39385 |
| 2399 | IPI00127358.1 | Sh3bgrl3         | 0.92 | 0.91 | 0.56584 | 0.74518 |
| 2400 | IPI00110918.1 | Mrps22           | 1.16 | 1.17 | 0.56602 | 0.57679 |
| 2401 | IPI00111754.6 | Mark2            | 1.30 | -    | 0.56602 | -       |
| 2402 | IPI00828227.2 | Mark2            | 1.30 | -    | 0.56602 | -       |
| 2403 | IPI00762727.2 | Mark2            | 1.30 | -    | 0.56602 | -       |
| 2404 | IPI00554871.3 | Mark2            | 1.30 | -    | 0.56602 | -       |
| 2405 | IPI00828737.1 | Mark2            | 1.30 | -    | 0.56602 | -       |
| 2406 | IPI00554855.2 | Mark2            | 1.30 | 0.95 | 0.56602 | 0.88967 |
| 2407 | IPI00378020.2 | Magi2            | 1.30 | -    | 0.56602 | -       |
| 2408 | IPI00849279.2 | Magi2            | 1.30 | -    | 0.56602 | -       |
| 2409 | IPI00719895.1 | Magi2            | 1.30 | 0.63 | 0.56602 | 0.37683 |
| 2410 | IPI00116770.1 | Rab18            | 0.87 | 0.93 | 0.56903 | 0.79634 |
| 2411 | IPI00653745.1 | Tmco1            | 0.82 | 1.13 | 0.57320 | 0.63321 |
| 2412 | IPI00121974.1 | Tmco1            | 0.82 | -    | 0.57320 | -       |
| 2413 | IPI00129360.4 | Itsn2            | 1.44 | -    | 0.57381 | -       |
| 2414 | IPI00762547.2 | Itsn2            | 1.44 | 1.03 | 0.57381 | 0.94077 |
| 2415 | IPI00554929.2 | Hsp90ab1         | 0.95 | 0.97 | 0.57405 | 0.9364  |
| 2416 | IPI00118230.1 | Mrpl16           | 1.12 | 1.02 | 0.57405 | 0.97749 |
| 2417 | IPI00420745.7 | Psm2             | 1.12 | -    | 0.57405 | -       |
| 2418 | IPI00890001.1 | Psm2             | 1.12 | 1.06 | 0.57405 | 0.77747 |
| 2419 | IPI00124819.1 | Coro1b           | 1.40 | 1.02 | 0.57405 | 0.869   |
| 2420 | IPI00129959.2 | Exoc4            | 0.86 | 0.75 | 0.57581 | 0.47039 |
| 2421 | IPI00230751.3 | Ctnna2           | 1.04 | -    | 0.57581 | -       |
| 2422 | IPI00330804.4 | Hsp90aa1         | 1.06 | 0.91 | 0.57582 | 0.57476 |
| 2423 | IPI00123349.2 | Sec23a           | 0.89 | 1.05 | 0.57861 | 0.76538 |
| 2424 | IPI00857239.1 | Atp6v0c          | 1.17 | 0.87 | 0.58007 | 0.38831 |
| 2425 | IPI00138378.4 | Atp6v0c;Atp6v0c- | 1.17 | -    | 0.58007 | -       |
| 2426 | IPI00380950.7 | Begain           | 1.38 | 0.51 | 0.58057 | -       |
| 2427 | IPI00133490.1 | LOC100044742;Pi  | 0.92 | 0.92 | 0.58149 | 0.55634 |
| 2428 | IPI00471022.3 | Plxnd1           | 1.17 | 0.93 | 0.58469 | 0.83596 |
| 2429 | IPI00122015.1 | Fam49b           | 1.12 | 1.04 | 0.58571 | 0.82245 |
| 2430 | IPI00788353.1 | Pitrm1           | 1.15 | -    | 0.58571 | -       |
| 2431 | IPI00788337.1 | Pitrm1           | 1.15 | 1.19 | 0.58571 | 0.62095 |
| 2432 | IPI00170126.4 | Pitrm1           | 1.15 | -    | 0.58571 | -       |
| 2433 | IPI00356904.7 | Farp1            | 0.75 | -    | 0.58621 | -       |
| 2434 | IPI00757373.3 | LOC100045542     | 0.75 | 0.71 | 0.58621 | 0.37683 |
| 2435 | IPI00230264.5 | H2afx            | 1.15 | 1.24 | 0.58621 | 0.47039 |
| 2436 | IPI00136806.4 | Lmbrd2           | 1.07 | -    | 0.58764 | -       |
| 2437 | IPI00857521.1 | Lmbrd2           | 1.07 | -    | 0.58764 | -       |
| 2438 | IPI00345312.5 | Slc39a12         | 1.56 | -    | 0.58764 | -       |
| 2439 | IPI00750694.2 | Slc39a12         | 1.56 | 0.74 | 0.58764 | -       |
| 2440 | IPI00331664.3 | Actn2            | 1.30 | -    | 0.58797 | -       |
| 2441 | IPI00122565.1 | Gdi2             | 0.95 | 0.94 | 0.58808 | 0.6116  |

|      |               |                 |      |      |         |         |
|------|---------------|-----------------|------|------|---------|---------|
| 2442 | IPI00108998.1 | Slc25a27        | 1.27 | 1.23 | 0.58808 | -       |
| 2443 | IPI00461333.1 | Slc25a27        | 1.27 | 1.22 | 0.58808 | -       |
| 2444 | IPI00944009.1 | Eef1d           | 1.10 | 1.13 | 0.59032 | 0.3937  |
| 2445 | IPI00132444.1 | Nipsnap3b       | 0.77 | 0.90 | 0.59081 | 0.73565 |
| 2446 | IPI00648141.1 | Gsk3a           | 1.20 | -    | 0.59102 | -       |
| 2447 | IPI00830754.1 | Gsk3a           | 1.20 | 0.74 | 0.59102 | 0.45615 |
| 2448 | IPI00124282.1 | Rala            | 1.05 | 1.13 | 0.59103 | 0.5546  |
| 2449 | IPI00652436.3 | Actg1           | 0.92 | 0.92 | 0.59160 | -       |
| 2450 | IPI00874482.1 | Actg1           | 0.92 | 0.96 | 0.59160 | 0.35843 |
| 2451 | IPI00323122.1 | Add2            | 0.94 | 1.02 | 0.59273 | 0.96295 |
| 2452 | IPI00113052.1 | Tsfm            | 1.11 | 1.00 | 0.59420 | 0.99153 |
| 2453 | IPI00137087.5 | Arfgef2         | 1.43 | 1.00 | 0.59497 | 0.98247 |
| 2454 | IPI00118795.1 | Csnk2a2         | 0.89 | -    | 0.59623 | -       |
| 2455 | IPI00274750.5 | Csnk2a2         | 0.89 | 1.03 | 0.59623 | -       |
| 2456 | IPI00753421.1 | LOC100046483    | 0.89 | -    | 0.59623 | -       |
| 2457 | IPI00404079.2 | Reep1           | 0.53 | 0.93 | 0.59986 | 0.76888 |
| 2458 | IPI00123059.1 | Scg5            | 1.12 | 0.86 | 0.60019 | 0.6116  |
| 2459 | IPI00606944.2 | Gm4970          | 0.75 | -    | 0.60105 | -       |
| 2460 | IPI00480307.1 | Cops2           | 0.74 | 0.90 | 0.60505 | 0.86253 |
| 2461 | IPI00756831.1 | Cops2           | 0.74 | -    | 0.60505 | -       |
| 2462 | IPI00114389.4 | App             | 0.89 | -    | 0.60505 | -       |
| 2463 | IPI00230494.5 | App             | 0.89 | 1.07 | 0.60505 | 0.89673 |
| 2464 | IPI00323079.1 | App             | 0.89 | 1.15 | 0.60505 | -       |
| 2465 | IPI00119970.4 | Cntn2           | 0.91 | 0.85 | 0.60505 | 0.67208 |
| 2466 | IPI00625248.3 | Impa1           | 1.16 | 0.97 | 0.60505 | 0.87413 |
| 2467 | IPI00849598.1 | Gm3405          | 1.35 | 1.10 | 0.60505 | -       |
| 2468 | IPI00474637.4 | Rpl10;LOC10004E | 1.35 | 1.23 | 0.60505 | -       |
| 2469 | IPI00775915.1 | Rpl10           | 1.35 | 1.14 | 0.60505 | 0.57854 |
| 2470 | IPI00915054.1 | Rpl10           | 1.35 | -    | 0.60505 | -       |
| 2471 | IPI00857484.1 | 1110007L15Rik   | 1.58 | -    | 0.60505 | -       |
| 2472 | IPI00272521.3 | 1110007L15Rik   | 1.58 | -    | 0.60505 | -       |
| 2473 | IPI00856756.1 | 1110007L15Rik   | 1.58 | -    | 0.60505 | -       |
| 2474 | IPI00742325.1 | 1110007L15Rik   | 1.58 | -    | 0.60505 | -       |
| 2475 | IPI00856197.1 | Ap1p2           | 1.48 | -    | 0.60548 | -       |
| 2476 | IPI00420172.1 | Agfg1           | 1.21 | -    | 0.60833 | -       |
| 2477 | IPI00230359.1 | Agfg1           | 1.21 | -    | 0.60833 | -       |
| 2478 | IPI00420171.1 | Agfg1           | 1.21 | 1.06 | 0.60833 | 0.60491 |
| 2479 | IPI00229333.1 | Ntrk2           | 1.17 | 0.94 | 0.61211 | 0.87629 |
| 2480 | IPI00318614.9 | Idh2            | 0.63 | -    | 0.61218 | -       |
| 2481 | IPI00875110.1 | Idh2            | 0.63 | 1.00 | 0.61218 | 0.99343 |
| 2482 | IPI00380331.1 | Ppp2r5d         | 1.35 | 0.93 | 0.61267 | 0.73026 |
| 2483 | IPI00857685.1 | Clip1           | 0.74 | -    | 0.61449 | -       |
| 2484 | IPI00123063.5 | Clip1           | 0.74 | -    | 0.61449 | -       |
| 2485 | IPI00761270.1 | Clip1           | 0.74 | 1.10 | 0.61449 | -       |
| 2486 | IPI00404318.1 | Clip1           | 0.74 | -    | 0.61449 | -       |
| 2487 | IPI00856800.1 | Clip1           | 0.74 | 1.12 | 0.61449 | -       |
| 2488 | IPI00857273.1 | Clip1           | 0.74 | -    | 0.61449 | -       |
| 2489 | IPI00648438.1 | Tanc2           | 0.77 | 1.00 | 0.61449 | -       |
| 2490 | IPI00551112.7 | Tanc2           | 0.77 | -    | 0.61449 | -       |
| 2491 | IPI00753652.1 | Arpc3           | 1.06 | -    | 0.61449 | -       |
| 2492 | IPI00751862.1 | Arpc3           | 1.06 | -    | 0.61449 | -       |
| 2493 | IPI00648787.1 | Cacnb1          | 1.14 | -    | 0.61449 | -       |



|      |               |                  |      |      |         |         |
|------|---------------|------------------|------|------|---------|---------|
| 2494 | IPI00421278.1 | Cacnb1           | 1.14 | -    | 0.61449 | -       |
| 2495 | IPI00421277.1 | Cacnb1           | 1.14 | 0.69 | 0.61449 | -       |
| 2496 | IPI00421276.1 | Cacnb1           | 1.14 | 1.10 | 0.61449 | 0.83215 |
| 2497 | IPI00828389.1 | Cacnb1           | 1.14 | -    | 0.61449 | -       |
| 2498 | IPI00321850.3 | Cacnb1           | 1.14 | -    | 0.61449 | -       |
| 2499 | IPI00135969.2 | Adss             | 0.84 | 0.76 | 0.61507 | 0.63059 |
| 2500 | IPI00121151.1 | Ubxn6            | 1.09 | -    | 0.61507 | -       |
| 2501 | IPI00323058.1 | Ubxn6            | 1.09 | 0.87 | 0.61507 | -       |
| 2502 | IPI00857784.1 | Cops4            | 1.19 | 1.02 | 0.61507 | -       |
| 2503 | IPI00131871.1 | Cops4            | 1.19 | 0.81 | 0.61507 | 0.62701 |
| 2504 | IPI00117910.3 | Prdx2            | 0.94 | 1.00 | 0.61702 | 1       |
| 2505 | IPI00323809.3 | Palm             | 0.91 | 0.81 | 0.61956 | 0.48931 |
| 2506 | IPI00119870.2 | Ctnna2           | 1.03 | -    | 0.61956 | -       |
| 2507 | IPI00322097.6 | Fyn              | 0.61 | -    | 0.61971 | -       |
| 2508 | IPI00927961.1 | Fyn              | 0.61 | -    | 0.61971 | -       |
| 2509 | IPI00331092.7 | Rps4x            | 0.84 | 1.18 | 0.62081 | 0.37683 |
| 2510 | IPI00467841.6 | Calm1;Calm3;Calm | 1.06 | -    | 0.62285 | -       |
| 2511 | IPI00922953.1 |                  | 0.95 | -    | 0.62399 | -       |
| 2512 | IPI00109122.1 | Psmas8           | 0.95 | -    | 0.62399 | -       |
| 2513 | IPI00830432.1 | Mapre3           | 0.74 | 0.93 | 0.62414 | 0.79785 |
| 2514 | IPI00755120.2 | Rrbp1            | 0.86 | 1.00 | 0.62791 | 0.99434 |
| 2515 | IPI00121149.1 | Rrbp1            | 0.86 | -    | 0.62791 | -       |
| 2516 | IPI00221581.1 | Eif4b            | 1.34 | 1.25 | 0.62791 | 0.38642 |
| 2517 | IPI00109221.3 | Sacm1l           | 1.10 | 0.88 | 0.62842 | 0.54381 |
| 2518 | IPI00798468.1 | Usp9x            | 0.86 | 0.94 | 0.62856 | 0.76109 |
| 2519 | IPI00331549.1 | Dhrs1            | 1.08 | 1.09 | 0.62929 | 0.49522 |
| 2520 | IPI00118235.1 | Mrpl3            | 0.81 | -    | 0.63015 | -       |
| 2521 | IPI00857677.1 | Mrpl3            | 0.81 | -    | 0.63015 | -       |
| 2522 | IPI00875325.1 | Aco1             | 0.75 | 0.99 | 0.63134 | 0.96032 |
| 2523 | IPI00622780.1 | Aco1             | 0.75 | -    | 0.63134 | -       |
| 2524 | IPI00875833.2 | Mthfd1l          | 0.49 | 1.03 | 0.63283 | 0.88143 |
| 2525 | IPI00228113.5 | Mthfd1l          | 0.49 | -    | 0.63283 | -       |
| 2526 | IPI00336318.1 | Pip4k2b          | 0.87 | 0.85 | 0.63283 | 0.47039 |
| 2527 | IPI00309413.5 | Nck2;LOC100044   | 0.89 | 0.95 | 0.63430 | -       |
| 2528 | IPI00122862.4 | Mthfd1           | 1.13 | -    | 0.63780 | -       |
| 2529 | IPI00953783.2 | Mthfd1           | 1.13 | 1.03 | 0.63780 | 0.86896 |
| 2530 | IPI00136936.1 | Vps29            | 1.14 | -    | 0.63873 | -       |
| 2531 | IPI00881968.1 | Vps29            | 1.14 | -    | 0.63873 | -       |
| 2532 | IPI00881215.1 | Vps29            | 1.14 | -    | 0.63873 | -       |
| 2533 | IPI00881629.1 | Vps29            | 1.14 | 0.92 | 0.63873 | -       |
| 2534 | IPI00230513.1 | Vps29            | 1.14 | 1.01 | 0.63873 | 0.98187 |
| 2535 | IPI00308484.3 | Sparcl1          | 1.47 | 1.12 | 0.63888 | 0.39388 |
| 2536 | IPI00154054.1 | Acat1            | 1.06 | 1.08 | 0.63907 | 0.49522 |
| 2537 | IPI00608097.1 | Npepps           | 0.91 | 0.90 | 0.64052 | 0.49522 |
| 2538 | IPI00130000.1 | Npepps           | 0.91 | -    | 0.64052 | -       |
| 2539 | IPI00469317.4 | Sars             | 0.94 | 0.90 | 0.64182 | 0.71877 |
| 2540 | IPI00225307.1 | Sars             | 0.94 | -    | 0.64182 | -       |
| 2541 | IPI00221998.4 | 2310001A20Rik    | 1.15 | 1.05 | 0.64266 | 0.80046 |
| 2542 | IPI00310091.8 | Ppp2r1a          | 1.04 | 0.93 | 0.64305 | 0.5754  |
| 2543 | IPI00120546.1 | Praf2            | 0.95 | 2.13 | 0.64457 | 0.38012 |
| 2544 | IPI00468516.3 | D6Wsu116e        | 1.16 | -    | 0.64551 | -       |
| 2545 | IPI00355382.2 | Wars             | 1.04 | 0.97 | 0.64556 | 0.81665 |

|      |               |                  |      |      |         |         |
|------|---------------|------------------|------|------|---------|---------|
| 2546 | IPI00113738.2 | Wars             | 1.04 | -    | 0.64556 | -       |
| 2547 | IPI00230615.8 | Nif3l1           | 1.29 | -    | 0.64556 | -       |
| 2548 | IPI00875732.1 | Nif3l1           | 1.29 | 1.01 | 0.64556 | 0.96994 |
| 2549 | IPI00405347.1 | Nif3l1           | 1.29 | 0.93 | 0.64556 | -       |
| 2550 | IPI00670546.3 | Ube2v2           | 0.86 | -    | 0.64744 | -       |
| 2551 | IPI00919055.1 | Tmem189;Ube2v    | 0.76 | -    | 0.64827 | -       |
| 2552 | IPI00461857.2 | Tbcd             | 0.84 | -    | 0.64827 | -       |
| 2553 | IPI00463589.2 | Atp2b4           | 1.25 | 0.80 | 0.64827 | 0.37995 |
| 2554 | IPI00626537.2 | Tm9sf4           | 4.36 | -    | 0.64827 | -       |
| 2555 | IPI00875190.2 | Tm9sf4           | 4.36 | 0.27 | 0.64827 | 0.64844 |
| 2556 | IPI00930878.1 | Psmc3            | 1.17 | -    | 0.65216 | -       |
| 2557 | IPI00405114.2 | Psmc3            | 1.17 | 1.17 | 0.65216 | 0.74437 |
| 2558 | IPI00129350.1 | Aldh18a1         | 1.17 | -    | 0.65311 | -       |
| 2559 | IPI00221398.1 | Aldh18a1         | 1.17 | 0.98 | 0.65311 | 0.91346 |
| 2560 | IPI00944043.1 | Aldh18a1         | 1.17 | -    | 0.65311 | -       |
| 2561 | IPI00848753.1 | LOC100047943     | 1.28 | -    | 0.65311 | -       |
| 2562 | IPI00471470.1 | Slc18a2          | 0.91 | 0.67 | 0.65319 | -       |
| 2563 | IPI00224463.1 | Slc18a2          | 0.91 | 1.37 | 0.65319 | -       |
| 2564 | IPI00460720.3 | Map4k4           | 0.39 | 0.97 | 0.65385 | -       |
| 2565 | IPI00881478.1 | Ncald            | 1.12 | 0.76 | 0.65385 | 0.47686 |
| 2566 | IPI00881068.1 | Ncald            | 1.12 | -    | 0.65385 | -       |
| 2567 | IPI00136483.1 | Psmb7            | 1.26 | 0.66 | 0.65385 | 0.5772  |
| 2568 | IPI00761696.2 | Calm1;Calm3;Calr | 1.05 | 0.92 | 0.65442 | 0.61297 |
| 2569 | IPI00408059.4 | Ppp2r5c          | 2.01 | 0.95 | 0.65530 | -       |
| 2570 | IPI00955742.1 | Strn3            | 1.17 | 0.92 | 0.65711 | 0.82543 |
| 2571 | IPI00229990.7 | Strn3            | 1.17 | -    | 0.65711 | -       |
| 2572 | IPI00223593.1 | Mbp              | 1.08 | 1.00 | 0.66066 | 0.98022 |
| 2573 | IPI00317902.3 | Psmb5            | 1.14 | -    | 0.66128 | -       |
| 2574 | IPI00470004.3 | Endod1           | 1.09 | 0.93 | 0.66225 | 0.86207 |
| 2575 | IPI00116112.3 | Dctn2            | 1.05 | 0.98 | 0.66248 | 0.9348  |
| 2576 | IPI00314467.3 | Psmb3            | 0.77 | 1.03 | 0.66253 | 0.89697 |
| 2577 | IPI00831081.1 | Ablim1           | 0.81 | -    | 0.66298 | -       |
| 2578 | IPI00755288.2 | Ablim1           | 0.81 | -    | 0.66298 | -       |
| 2579 | IPI00831353.1 | Ablim1           | 0.81 | -    | 0.66298 | -       |
| 2580 | IPI00463138.1 | Ablim1           | 0.81 | 0.65 | 0.66298 | -       |
| 2581 | IPI00831178.1 | Ablim1           | 0.81 | -    | 0.66298 | -       |
| 2582 | IPI00467530.3 | Ablim1           | 0.81 | -    | 0.66298 | -       |
| 2583 | IPI00356147.4 | Ablim1           | 0.81 | 1.38 | 0.66298 | 0.84304 |
| 2584 | IPI00474073.1 | Mapre2           | 0.87 | 0.93 | 0.66298 | 0.81665 |
| 2585 | IPI00882056.2 | Mapre2           | 0.87 | -    | 0.66298 | -       |
| 2586 | IPI00403682.2 | Mapre2           | 0.87 | -    | 0.66298 | -       |
| 2587 | IPI00856504.1 | Pdxdc1           | 1.39 | -    | 0.66298 | -       |
| 2588 | IPI00856623.1 | Pdxdc1           | 1.39 | -    | 0.66298 | -       |
| 2589 | IPI00858296.1 | Pdxdc1           | 1.39 | -    | 0.66298 | -       |
| 2590 | IPI00742405.1 | Pdxdc1           | 1.39 | 0.59 | 0.66298 | 0.43985 |
| 2591 | IPI00857581.1 | Pdxdc1           | 1.39 | -    | 0.66298 | -       |
| 2592 | IPI00336503.1 | Pdxdc1           | 1.39 | -    | 0.66298 | -       |
| 2593 | IPI00885811.1 | Arl8a            | 0.84 | 1.07 | 0.66299 | 0.69091 |
| 2594 | IPI00124610.1 | Arl8a            | 0.84 | -    | 0.66299 | -       |
| 2595 | IPI00554992.2 | Kif1a            | 1.16 | -    | 0.66590 | -       |
| 2596 | IPI00132966.3 | Ppid             | 1.19 | 0.99 | 0.66590 | 0.99343 |
| 2597 | IPI00882293.1 | Mboat7           | 0.90 | 1.08 | 0.66751 | -       |

|      |               |                |      |      |         |         |
|------|---------------|----------------|------|------|---------|---------|
| 2598 | IPI00319646.3 | Mboat7         | 0.90 | 0.95 | 0.66751 | 0.85426 |
| 2599 | IPI00880948.1 | Acadsb         | 1.11 | 0.96 | 0.66855 | 0.50124 |
| 2600 | IPI00119842.1 | Acadsb         | 1.11 | -    | 0.66855 | -       |
| 2601 | IPI00133206.1 | Psmc3          | 1.23 | -    | 0.66922 | -       |
| 2602 | IPI00222457.2 | Dars           | 1.08 | 1.02 | 0.66941 | 0.81108 |
| 2603 | IPI00122743.1 | Dars           | 1.08 | -    | 0.66941 | -       |
| 2604 | IPI00271388.1 | Osbp110        | 1.11 | -    | 0.67140 | -       |
| 2605 | IPI00458976.1 | Rab5b          | 1.03 | -    | 0.67507 | -       |
| 2606 | IPI00153103.3 | Aimp2          | 1.14 | -    | 0.67507 | -       |
| 2607 | IPI00858183.1 | Aimp2          | 1.14 | 1.20 | 0.67507 | 0.37683 |
| 2608 | IPI00122215.1 | Tor1aip1       | 1.36 | -    | 0.67507 | -       |
| 2609 | IPI00830554.2 | Tor1aip1       | 1.36 | -    | 0.67507 | -       |
| 2610 | IPI00762273.1 | Tor1aip1       | 1.36 | 1.05 | 0.67507 | 0.8841  |
| 2611 | IPI00929798.1 | Cacnb1         | 0.85 | -    | 0.67613 | -       |
| 2612 | IPI00118120.1 | Myo5a          | 1.04 | -    | 0.67613 | -       |
| 2613 | IPI00222538.2 | Mrps35         | 1.09 | -    | 0.67625 | -       |
| 2614 | IPI00894878.1 | Mrps35         | 1.09 | 1.22 | 0.67625 | 0.73026 |
| 2615 | IPI00109389.1 | 2400003C14Rik  | 1.11 | 1.15 | 0.68178 | 0.9111  |
| 2616 | IPI00153317.3 | Aldh11l        | 0.92 | 0.80 | 0.68691 | 0.39388 |
| 2617 | IPI00127501.1 | Grcc10         | 0.93 | 0.91 | 0.68766 | 0.6116  |
| 2618 | IPI00387216.1 | Cul2           | 1.19 | 0.78 | 0.68845 | 0.65209 |
| 2619 | IPI00126834.1 | Vcam1          | 1.33 | -    | 0.69204 | -       |
| 2620 | IPI00653571.2 | Vcam1          | 1.33 | -    | 0.69204 | -       |
| 2621 | IPI00753990.1 | Nudt3;LOC10004 | 1.25 | 1.00 | 0.69360 | 0.99739 |
| 2622 | IPI00128904.1 | Pcbp1          | 0.89 | 1.09 | 0.69422 | 0.47039 |
| 2623 | IPI00402913.1 | Ube2v2         | 0.84 | -    | 0.69463 | -       |
| 2624 | IPI00464127.1 | Ube2v1;Tmem18  | 0.84 | -    | 0.69463 | -       |
| 2625 | IPI00672748.4 | -              | 0.84 | -    | 0.69463 | -       |
| 2626 | IPI00226882.7 | Sec61a1        | 0.86 | 1.03 | 0.69545 | 0.85412 |
| 2627 | IPI00474285.1 | Scrib          | 0.87 | -    | 0.69546 | -       |
| 2628 | IPI00454104.1 | Scrib          | 0.87 | 0.98 | 0.69546 | -       |
| 2629 | IPI00129388.1 | Scrib          | 0.87 | -    | 0.69546 | -       |
| 2630 | IPI00454106.1 | Scrib          | 0.87 | -    | 0.69546 | -       |
| 2631 | IPI00224775.2 | Ppfa2          | 0.94 | -    | 0.69546 | -       |
| 2632 | IPI00229884.1 | Pak2           | 1.26 | 0.51 | 0.69693 | -       |
| 2633 | IPI00347255.6 | D15Wsu169e     | 1.14 | -    | 0.69728 | -       |
| 2634 | IPI00469950.4 | D15Wsu169e     | 1.14 | 1.05 | 0.69728 | 0.869   |
| 2635 | IPI00338854.3 | Gnai3          | 0.85 | 0.86 | 0.69775 | 0.66504 |
| 2636 | IPI00132080.1 | Pgls           | 0.90 | -    | 0.69964 | -       |
| 2637 | IPI00122353.1 | Prkcsh         | 0.89 | 1.41 | 0.70003 | 0.35843 |
| 2638 | IPI00311387.1 | Ap3m1          | 0.89 | -    | 0.70046 | -       |
| 2639 | IPI00896727.1 | Cand1          | 1.05 | 0.88 | 0.70189 | 0.39388 |
| 2640 | IPI00120374.1 | Ppp2ca         | 1.06 | 1.04 | 0.70248 | 0.76194 |
| 2641 | IPI00224733.3 | Pddc1          | 1.12 | 1.16 | 0.70248 | 0.61162 |
| 2642 | IPI00831554.1 | 5-Mar          | 0.87 | 1.07 | 0.70256 | 0.62623 |
| 2643 | IPI00131895.4 | 5-Mar          | 0.87 | -    | 0.70256 | -       |
| 2644 | IPI00403055.1 | Psmf1          | 0.73 | -    | 0.70362 | -       |
| 2645 | IPI00894885.1 | Psmf1          | 0.73 | 0.74 | 0.70362 | 0.37683 |
| 2646 | IPI00308187.1 | Vapb           | 1.07 | 1.05 | 0.70362 | 0.75519 |
| 2647 | IPI00135655.3 | Vapb           | 1.07 | -    | 0.70362 | -       |
| 2648 | IPI00420806.3 | Dync1li2       | 0.92 | -    | 0.70419 | -       |
| 2649 | IPI00928256.1 | Dync1li2       | 0.92 | 0.83 | 0.70419 | 0.59331 |

|      |               |                 |      |      |         |         |
|------|---------------|-----------------|------|------|---------|---------|
| 2650 | IPI00169546.1 | Gmids           | 0.91 | 0.56 | 0.70424 | -       |
| 2651 | IPI00918653.1 | Lphn1           | 1.08 | -    | 0.70424 | -       |
| 2652 | IPI00918724.1 | Lphn1           | 1.08 | -    | 0.70424 | -       |
| 2653 | IPI00553717.6 | Mccc2           | 1.10 | 1.13 | 0.70556 | 0.45615 |
| 2654 | IPI00111412.3 | Rpl4            | 0.92 | 1.15 | 0.70617 | 0.35843 |
| 2655 | IPI00138232.4 | Gprin1          | 1.06 | 0.94 | 0.70617 | 0.83335 |
| 2656 | IPI00830375.1 | Bad             | 1.08 | -    | 0.70617 | -       |
| 2657 | IPI00752265.1 | Bad             | 1.08 | -    | 0.70617 | -       |
| 2658 | IPI00119986.1 | Bad             | 1.08 | -    | 0.70617 | -       |
| 2659 | IPI00752233.1 | Bad             | 1.08 | 1.21 | 0.70617 | -       |
| 2660 | IPI00856453.1 | Eif4g1          | 1.32 | -    | 0.70617 | -       |
| 2661 | IPI00421179.1 | Eif4g1          | 1.32 | -    | 0.70617 | -       |
| 2662 | IPI00858249.1 | Eif4g1          | 1.32 | -    | 0.70617 | -       |
| 2663 | IPI00124614.1 | Epm2aip1        | 1.04 | 1.00 | 0.70660 | 1       |
| 2664 | IPI00775863.1 | Gnb2            | 1.07 | 0.91 | 0.70959 | 0.48356 |
| 2665 | IPI00420426.1 | Ap3b2           | 1.08 | 1.02 | 0.71224 | 0.96295 |
| 2666 | IPI00122273.1 | Dag1            | 1.24 | 0.73 | 0.71224 | 0.37934 |
| 2667 | IPI00876343.1 | Hip1r           | 1.36 | 1.00 | 0.71348 | 1       |
| 2668 | IPI00311726.3 | Hip1r           | 1.36 | -    | 0.71348 | -       |
| 2669 | IPI00133218.3 | Arl8b           | 0.91 | 1.15 | 0.71477 | 0.37683 |
| 2670 | IPI00378764.6 | Vgf             | 1.16 | 0.92 | 0.71477 | 0.66498 |
| 2671 | IPI00653328.2 | Eps15l1         | 0.88 | -    | 0.71616 | -       |
| 2672 | IPI00135965.2 | Ina             | 1.14 | 1.09 | 0.71886 | 0.8044  |
| 2673 | IPI00402982.2 | Tmod2           | 0.94 | 0.96 | 0.72027 | 0.78685 |
| 2674 | IPI00676489.1 | Ctnnd1          | 0.92 | -    | 0.72487 | -       |
| 2675 | IPI00752108.1 | Ctnnd1          | 0.92 | -    | 0.72487 | -       |
| 2676 | IPI00403823.1 | Ctnnd1          | 0.92 | 0.88 | 0.72487 | 0.57476 |
| 2677 | IPI00754401.1 | Ctnnd1          | 0.92 | -    | 0.72487 | -       |
| 2678 | IPI00316623.4 | Ctnnd1          | 0.92 | -    | 0.72487 | -       |
| 2679 | IPI00757459.1 | Ctnnd1          | 0.92 | -    | 0.72487 | -       |
| 2680 | IPI00756875.1 | Ctnnd1          | 0.92 | -    | 0.72487 | -       |
| 2681 | IPI00660602.1 | Ctnnd1          | 0.92 | -    | 0.72487 | -       |
| 2682 | IPI00753220.1 | Ctnnd1          | 0.92 | -    | 0.72487 | -       |
| 2683 | IPI00752593.1 | Ctnnd1          | 0.92 | -    | 0.72487 | -       |
| 2684 | IPI00663949.1 | Ctnnd1          | 0.92 | -    | 0.72487 | -       |
| 2685 | IPI00755935.1 | Ctnnd1          | 0.92 | -    | 0.72487 | -       |
| 2686 | IPI00750243.1 | Ctnnd1          | 0.92 | -    | 0.72487 | -       |
| 2687 | IPI00649344.1 | Tmed4           | 0.93 | 1.00 | 0.72487 | 1       |
| 2688 | IPI00277001.4 | Psma4           | 1.06 | 0.92 | 0.72487 | 0.8586  |
| 2689 | IPI00134621.3 | Ran;LOC1000459! | 1.07 | 0.92 | 0.72487 | 0.54506 |
| 2690 | IPI00466919.7 | Pgd             | 1.20 | -    | 0.72487 | -       |
| 2691 | IPI00894579.1 | Pgd             | 1.20 | 0.90 | 0.72487 | 0.5754  |
| 2692 | IPI00620040.3 | Ppm1h           | 1.23 | 0.83 | 0.72744 | 0.47039 |
| 2693 | IPI00944734.1 | Ctnna2          | 1.03 | 0.82 | 0.72908 | 0.37683 |
| 2694 | IPI00128249.1 | Ahsg            | 1.05 | 1.19 | 0.72951 | 0.54327 |
| 2695 | IPI00134095.3 | Birc6           | 0.91 | 0.55 | 0.73290 | 0.37683 |
| 2696 | IPI00119880.1 | Nudt3           | 0.92 | -    | 0.73290 | -       |
| 2697 | IPI00885459.1 | Tnik            | 0.93 | 0.94 | 0.73290 | -       |
| 2698 | IPI00938472.1 | Tnik            | 0.93 | -    | 0.73290 | -       |
| 2699 | IPI00886378.1 | Tnik            | 0.93 | -    | 0.73290 | -       |
| 2700 | IPI00886317.1 | Tnik            | 0.93 | -    | 0.73290 | -       |
| 2701 | IPI00662721.3 | Tnik            | 0.93 | -    | 0.73290 | -       |

|      |               |                 |      |      |         |         |
|------|---------------|-----------------|------|------|---------|---------|
| 2702 | IPI00132705.1 | Myl12b          | 0.96 | 0.98 | 0.73290 | 0.86978 |
| 2703 | IPI00890005.1 | Hnrnpk          | 0.97 | -    | 0.73290 | -       |
| 2704 | IPI00465574.2 | Hnrnpk          | 0.97 | 0.99 | 0.73290 | -       |
| 2705 | IPI00845769.1 | Gpd1l           | 1.04 | -    | 0.73290 | -       |
| 2706 | IPI00653847.1 | Cspg5           | 1.12 | 1.20 | 0.73290 | -       |
| 2707 | IPI00651984.1 | Dcps            | 1.14 | 1.21 | 0.73290 | 0.52993 |
| 2708 | IPI00459280.2 | Dcps            | 1.14 | 0.88 | 0.73290 | -       |
| 2709 | IPI00407137.1 | Cpne4           | 1.16 | 0.91 | 0.73290 | 0.81665 |
| 2710 | IPI00108980.2 | Cpne4           | 1.16 | -    | 0.73290 | -       |
| 2711 | IPI00469318.1 | Osbpl1a         | 1.17 | -    | 0.73290 | -       |
| 2712 | IPI00625286.1 | Osbpl1a         | 1.17 | 0.96 | 0.73290 | 0.69126 |
| 2713 | IPI00742367.1 | Osbpl1a         | 1.17 | -    | 0.73290 | -       |
| 2714 | IPI00885663.1 | Osbpl1a         | 1.17 | -    | 0.73290 | -       |
| 2715 | IPI00111013.1 | Ctsd            | 1.18 | -    | 0.73290 | -       |
| 2716 | IPI00404551.1 | Ctsd            | 1.18 | 1.15 | 0.73290 | 0.49522 |
| 2717 | IPI00117731.1 | Erc1;LOC1000486 | 1.43 | -    | 0.73290 | -       |
| 2718 | IPI00136135.1 | Ctnnd2          | 0.94 | -    | 0.73541 | -       |
| 2719 | IPI00228632.1 | Ctnnd2          | 0.94 | 0.71 | 0.73541 | 0.45615 |
| 2720 | IPI00228618.5 | Gnaq            | 0.97 | 0.95 | 0.73642 | 0.83638 |
| 2721 | IPI00420926.3 | Arvcf           | 1.18 | 0.84 | 0.73642 | -       |
| 2722 | IPI00625693.1 | Arvcf           | 1.18 | -    | 0.73642 | -       |
| 2723 | IPI00127472.2 | Arvcf           | 1.18 | -    | 0.73642 | -       |
| 2724 | IPI00621122.1 | Arvcf           | 1.18 | -    | 0.73642 | -       |
| 2725 | IPI00620282.1 | Arvcf           | 1.18 | -    | 0.73642 | -       |
| 2726 | IPI00890867.1 | Rad23b          | 1.03 | 0.90 | 0.74269 | 0.49522 |
| 2727 | IPI00108774.1 | Rad23b          | 1.03 | -    | 0.74269 | -       |
| 2728 | IPI00119756.1 | Cd200           | 0.79 | -    | 0.74312 | -       |
| 2729 | IPI00775807.1 | Cd200           | 0.79 | 0.83 | 0.74312 | 0.84073 |
| 2730 | IPI00622742.1 | Capn2           | 0.86 | -    | 0.74318 | -       |
| 2731 | IPI00875405.1 | Psmc1           | 1.07 | 0.98 | 0.74534 | 0.9364  |
| 2732 | IPI00267295.5 | Psmc1           | 1.07 | -    | 0.74534 | -       |
| 2733 | IPI00881091.1 | Ctsd            | 1.21 | -    | 0.74629 | -       |
| 2734 | IPI00875478.1 | Ralgapb         | 0.93 | 0.92 | 0.74640 | -       |
| 2735 | IPI00663802.1 | Ralgapb         | 0.93 | 0.86 | 0.74640 | -       |
| 2736 | IPI00118849.1 | Dyrk1a          | 0.69 | -    | 0.74720 | -       |
| 2737 | IPI00880773.1 | Dyrk1a          | 0.69 | -    | 0.74720 | -       |
| 2738 | IPI00131035.2 | Mtmr7           | 0.82 | -    | 0.74720 | -       |
| 2739 | IPI00753044.1 | Arpc3           | 1.03 | -    | 0.74720 | -       |
| 2740 | IPI00124829.5 | Arpc3           | 1.03 | 1.06 | 0.74720 | 0.59832 |
| 2741 | IPI00317289.8 | Dctn4           | 1.02 | -    | 0.74728 | -       |
| 2742 | IPI00857934.1 | Cops4           | 1.16 | -    | 0.75112 | -       |
| 2743 | IPI00225275.5 | Pygm            | 1.06 | 0.83 | 0.75514 | 0.6116  |
| 2744 | IPI00831057.1 | Pygm            | 1.06 | -    | 0.75514 | -       |
| 2745 | IPI00133349.1 | Carhsp1         | 0.93 | 0.84 | 0.75748 | 0.49522 |
| 2746 | IPI00322760.7 | Prodh           | 0.60 | 1.11 | 0.75783 | 0.53529 |
| 2747 | IPI00112414.1 | Cse1l           | 0.95 | 1.06 | 0.75783 | 0.51132 |
| 2748 | IPI00126083.3 | Ehd1            | 0.90 | 1.00 | 0.75836 | -       |
| 2749 | IPI00119239.2 | Psmc6           | 1.10 | 0.75 | 0.75836 | -       |
| 2750 | IPI00110684.1 | Ppa1            | 1.06 | 1.00 | 0.76078 | 1       |
| 2751 | IPI00876097.1 | Plxna4          | 0.94 | 0.85 | 0.76175 | 0.71119 |
| 2752 | IPI00187545.4 | Plxna4          | 0.94 | -    | 0.76175 | -       |
| 2753 | IPI00881473.1 | Qdpr            | 1.11 | 0.87 | 0.76175 | -       |

|      |                |             |      |      |         |         |
|------|----------------|-------------|------|------|---------|---------|
| 2754 | IPI00119024.3  | Arl6ip5     | 0.88 | 1.08 | 0.76185 | 0.73565 |
| 2755 | IPI00751955.1  | Tmx2        | 1.07 | 1.00 | 0.76549 | 0.99618 |
| 2756 | IPI00459309.2  | Gm5499;Tmx2 | 1.07 | -    | 0.76549 | -       |
| 2757 | IPI00264750.4  | Vcam1       | 1.30 | 1.10 | 0.76549 | -       |
| 2758 | IPI00222429.6  | Nomo1       | 1.06 | 1.22 | 0.76710 | 0.35843 |
| 2759 | IPI00453829.3  | Tmx4        | 1.14 | 1.30 | 0.76801 | 0.47039 |
| 2760 | IPI00124828.1  | Mrps31      | 0.88 | 0.87 | 0.76855 | 0.76194 |
| 2761 | IPI00115663.2  | Dctn1       | 0.97 | -    | 0.76855 | -       |
| 2762 | IPI00856365.1  | Dctn1       | 0.97 | 0.96 | 0.76855 | 0.74723 |
| 2763 | IPI00226215.1  | Slc6a11     | 1.06 | 0.92 | 0.76875 | 0.78833 |
| 2764 | IPI00136867.1  | Slc6a11     | 1.06 | -    | 0.76875 | -       |
| 2765 | IPI00480564.1  | Cntn6       | 1.08 | -    | 0.76886 | -       |
| 2766 | IPI00312433.1  | Cntn6       | 1.08 | -    | 0.76886 | -       |
| 2767 | IPI00229475.1  | Jup         | 0.93 | 0.89 | 0.77091 | 0.86916 |
| 2768 | IPI00116850.3  | D10Wsu52e   | 0.93 | 1.06 | 0.77091 | 0.6252  |
| 2769 | IPI00134017.1  | Chordc1     | 0.91 | 1.04 | 0.77399 | 0.91146 |
| 2770 | IPI00223398.1  | Nf1         | 1.13 | 0.89 | 0.77399 | 0.49522 |
| 2771 | IPI00108783.1  | Nf1         | 1.13 | -    | 0.77399 | -       |
| 2772 | IPI00119116.1  | Ppox        | 1.10 | 1.01 | 0.77580 | 0.98629 |
| 2773 | IPI00751474.1  | Atp2b4      | 1.19 | 0.82 | 0.77728 | -       |
| 2774 | IPI00750917.2  | Atp2b4      | 1.19 | -    | 0.77728 | -       |
| 2775 | IPI00404438.1  | Picalm      | 1.05 | -    | 0.78154 | -       |
| 2776 | IPI00264501.8  | Picalm      | 1.05 | -    | 0.78154 | -       |
| 2777 | IPI00284521.9  | Dock3       | 1.09 | 0.70 | 0.78220 | 0.35843 |
| 2778 | IPI00132206.22 | Dnajc5      | 0.92 | -    | 0.78222 | -       |
| 2779 | IPI00221615.5  | Arf5        | 0.70 | 1.03 | 0.78312 | 0.79785 |
| 2780 | IPI00116546.2  | Prkar2a     | 1.06 | -    | 0.78345 | -       |
| 2781 | IPI00473176.1  | Impa1       | 1.08 | -    | 0.78577 | -       |
| 2782 | IPI00221611.3  | Cdc42se2    | 1.08 | -    | 0.78577 | -       |
| 2783 | IPI00117580.9  | BC005764    | 0.83 | 1.22 | 0.78938 | 0.63407 |
| 2784 | IPI00282873.2  | LOC635992   | 0.88 | 0.85 | 0.79311 | 0.65135 |
| 2785 | IPI00420186.1  | Eps15l1     | 0.94 | 0.96 | 0.79311 | -       |
| 2786 | IPI00320016.7  | Nono        | 1.04 | 1.15 | 0.79311 | 0.61282 |
| 2787 | IPI00848866.1  | Gm8894      | 1.06 | -    | 0.79311 | -       |
| 2788 | IPI00850361.1  | Gm8894      | 1.06 | -    | 0.79311 | -       |
| 2789 | IPI00354819.5  | Myl6        | 1.06 | -    | 0.79311 | -       |
| 2790 | IPI00409817.2  | Myl6        | 1.06 | 0.93 | 0.79311 | 0.73565 |
| 2791 | IPI00474757.4  | Gm5915      | 1.06 | -    | 0.79311 | -       |
| 2792 | IPI00462232.3  | Gm5526      | 1.06 | -    | 0.79311 | -       |
| 2793 | IPI00753623.1  | LOC674810   | 1.27 | -    | 0.79312 | -       |
| 2794 | IPI00331628.5  | Hsd17b4     | 1.03 | 1.00 | 0.79703 | 0.96924 |
| 2795 | IPI00406800.4  | Capzb       | 1.03 | -    | 0.79729 | -       |
| 2796 | IPI00776374.1  | Capzb       | 1.03 | -    | 0.79729 | -       |
| 2797 | IPI00115454.3  | Sfxn1       | 1.05 | 1.09 | 0.79965 | 0.35843 |
| 2798 | IPI00655041.2  | Exoc2       | 0.94 | 1.11 | 0.80003 | 0.8281  |
| 2799 | IPI00111981.1  | Ola1        | 0.98 | 0.76 | 0.80088 | 0.38642 |
| 2800 | IPI00754697.1  | Ola1        | 0.98 | -    | 0.80088 | -       |
| 2801 | IPI00130118.1  | Rab10       | 1.07 | 1.04 | 0.80088 | 0.65939 |
| 2802 | IPI00719950.2  | Src         | 1.07 | 1.08 | 0.80150 | -       |
| 2803 | IPI00620622.2  | Src         | 1.07 | 0.80 | 0.80150 | 0.79353 |
| 2804 | IPI00222801.5  | Src         | 1.07 | -    | 0.80150 | -       |
| 2805 | IPI00125939.3  | Acot7       | 1.03 | -    | 0.80214 | -       |

|      |               |               |      |      |         |         |
|------|---------------|---------------|------|------|---------|---------|
| 2806 | IPI00230588.1 | Acot7         | 1.03 | 1.02 | 0.80214 | 0.96001 |
| 2807 | IPI00284094.4 | Acot7         | 1.03 | -    | 0.80214 | -       |
| 2808 | IPI00672508.1 | Acot7         | 1.03 | -    | 0.80214 | -       |
| 2809 | IPI00895479.1 | 2810422J05Rik | 0.95 | -    | 0.80368 | -       |
| 2810 | IPI00880817.1 | Ppp2r2d       | 1.10 | 0.69 | 0.80373 | -       |
| 2811 | IPI00473753.2 | Ppp2r2d       | 1.10 | -    | 0.80373 | -       |
| 2812 | IPI00461290.1 | Osbp18        | 1.12 | 0.92 | 0.80420 | 0.53529 |
| 2813 | IPI00848595.1 | Dtd1          | 1.08 | 0.96 | 0.80474 | 0.86896 |
| 2814 | IPI00133713.5 | Dtd1          | 1.08 | -    | 0.80474 | -       |
| 2815 | IPI00110264.2 | Ptpnf         | 1.10 | -    | 0.80474 | -       |
| 2816 | IPI00399905.5 | Ppfia3        | 1.04 | 0.89 | 0.80602 | 0.6252  |
| 2817 | IPI00762919.2 | Hip1          | 0.88 | -    | 0.80857 | -       |
| 2818 | IPI00755019.1 | Ank1          | 0.74 | -    | 0.80949 | -       |
| 2819 | IPI00755993.1 | Ank1          | 0.74 | -    | 0.80949 | -       |
| 2820 | IPI00119871.3 | Ank1          | 0.74 | -    | 0.80949 | -       |
| 2821 | IPI00127163.4 | Ank1          | 0.74 | 1.38 | 0.80949 | 0.33373 |
| 2822 | IPI00874807.1 | Ank1          | 0.74 | -    | 0.80949 | -       |
| 2823 | IPI00881427.1 | Ank1          | 0.74 | -    | 0.80949 | -       |
| 2824 | IPI00755395.1 | Ank1          | 0.74 | -    | 0.80949 | -       |
| 2825 | IPI00882025.1 | Ank1          | 0.74 | -    | 0.80949 | -       |
| 2826 | IPI00474771.2 | Ank1          | 0.74 | -    | 0.80949 | -       |
| 2827 | IPI00756691.1 | Gorasp2       | 1.08 | -    | 0.80977 | -       |
| 2828 | IPI00753317.3 | Gorasp2       | 1.08 | -    | 0.80977 | -       |
| 2829 | IPI00165716.4 | Gorasp2       | 1.08 | -    | 0.80977 | -       |
| 2830 | IPI00461744.2 | Gorasp2       | 1.08 | 1.12 | 0.80977 | 0.77883 |
| 2831 | IPI00111045.1 | Timm50        | 1.11 | 1.00 | 0.80977 | 0.98135 |
| 2832 | IPI00321170.8 | Rpl3          | 1.19 | -    | 0.80977 | -       |
| 2833 | IPI00754487.1 | -             | 1.19 | 1.10 | 0.80977 | 0.49057 |
| 2834 | IPI00755309.1 | Rpl3;Gm16468  | 1.19 | -    | 0.80977 | -       |
| 2835 | IPI00132539.3 | Btf3l4        | 0.92 | 1.03 | 0.80978 | 0.95722 |
| 2836 | IPI00229527.7 | Lta4h         | 0.89 | -    | 0.81035 | -       |
| 2837 | IPI00798439.1 | Lta4h         | 0.89 | 0.98 | 0.81035 | 0.96001 |
| 2838 | IPI00187407.4 | Cops8         | 1.06 | 0.64 | 0.81035 | 0.62995 |
| 2839 | IPI00130489.1 | Rab35         | 1.03 | 0.91 | 0.81090 | 0.49522 |
| 2840 | IPI00928518.1 | Pgls          | 0.92 | -    | 0.81129 | -       |
| 2841 | IPI00128945.1 | Psmb2         | 1.07 | 1.02 | 0.81129 | 0.9301  |
| 2842 | IPI00225322.1 | Add1          | 0.96 | 0.85 | 0.81153 | 0.47039 |
| 2843 | IPI00856779.1 | Add1          | 0.96 | -    | 0.81153 | -       |
| 2844 | IPI00136000.1 | Add1          | 0.96 | 0.89 | 0.81153 | -       |
| 2845 | IPI00856904.1 | Add1          | 0.96 | -    | 0.81153 | -       |
| 2846 | IPI00856144.1 | Add1          | 0.96 | -    | 0.81153 | -       |
| 2847 | IPI00230238.3 | Rab11fip5     | 0.97 | -    | 0.81153 | -       |
| 2848 | IPI00756275.2 | Plxn2         | 1.17 | 1.07 | 0.81153 | 0.84785 |
| 2849 | IPI00127942.4 | Dstn          | 1.10 | 0.87 | 0.81170 | 0.53578 |
| 2850 | IPI00464166.2 | Ptpn23        | 1.06 | -    | 0.81274 | -       |
| 2851 | IPI00606716.2 | Ptpn23        | 1.06 | 0.87 | 0.81274 | 0.49522 |
| 2852 | IPI00894804.1 | Dnajc5        | 0.95 | 0.93 | 0.81287 | -       |
| 2853 | IPI00223047.2 | Ckap4         | 0.91 | 1.09 | 0.81319 | 0.54845 |
| 2854 | IPI00119680.3 | Ap1m1         | 0.92 | 0.96 | 0.81319 | 0.82911 |
| 2855 | IPI00828535.1 | Atrn          | 1.06 | 0.84 | 0.81331 | 0.73026 |
| 2856 | IPI00224752.7 | Atrn          | 1.06 | -    | 0.81331 | -       |
| 2857 | IPI00112963.1 | Ctnna1        | 1.06 | 0.65 | 0.81360 | 0.33373 |

|      |               |                 |      |      |         |         |
|------|---------------|-----------------|------|------|---------|---------|
| 2858 | IPI00471246.2 | Ivd             | 1.16 | 1.02 | 0.81360 | 0.96546 |
| 2859 | IPI00117733.1 | Erc1            | 1.23 | 1.10 | 0.81795 | 0.88143 |
| 2860 | IPI00457547.2 | Erc1            | 1.23 | -    | 0.81795 | -       |
| 2861 | IPI00881767.1 | Ncald           | 1.11 | -    | 0.81809 | -       |
| 2862 | IPI00132314.1 | Nucb1           | 0.90 | -    | 0.81867 | -       |
| 2863 | IPI00654387.4 | Nucb1           | 0.90 | 1.44 | 0.81867 | -       |
| 2864 | IPI00420467.1 | Pvrl1           | 1.05 | 0.44 | 0.81867 | 0.62552 |
| 2865 | IPI00311405.3 | Pvrl1           | 1.05 | -    | 0.81867 | -       |
| 2866 | IPI00134918.4 | Ptpmt1          | 1.16 | 0.93 | 0.81867 | 0.49165 |
| 2867 | IPI00762435.2 | Fyn             | 0.90 | 0.96 | 0.81930 | 0.95352 |
| 2868 | IPI00515590.1 | Nsg2            | 0.87 | -    | 0.82181 | -       |
| 2869 | IPI00515215.1 | Nsg2            | 0.87 | -    | 0.82181 | -       |
| 2870 | IPI00111273.1 | Nsg2            | 0.87 | 0.57 | 0.82181 | 0.71708 |
| 2871 | IPI00515330.1 | 9-Sep           | 0.92 | 0.91 | 0.82181 | 0.64574 |
| 2872 | IPI00648786.1 | 9-Sep           | 0.92 | -    | 0.82181 | -       |
| 2873 | IPI00457611.2 | 9-Sep           | 0.92 | -    | 0.82181 | -       |
| 2874 | IPI00271166.4 | Htt             | 0.76 | 1.11 | 0.82299 | -       |
| 2875 | IPI00918921.1 | Tmem189         | 0.92 | -    | 0.82299 | -       |
| 2876 | IPI00918685.1 | Ube2v1;Tmem18'  | 0.92 | -    | 0.82299 | -       |
| 2877 | IPI00124221.1 | Atp1b3          | 1.04 | 0.86 | 0.82299 | 0.37683 |
| 2878 | IPI00121623.1 | Dynll1          | 1.06 | 0.87 | 0.82299 | 0.65066 |
| 2879 | IPI00227836.1 | Ola1            | 0.98 | 0.99 | 0.82337 | -       |
| 2880 | IPI00337050.1 | Dock9           | 1.03 | -    | 0.82337 | -       |
| 2881 | IPI00896597.1 | Dock9           | 1.03 | -    | 0.82337 | -       |
| 2882 | IPI00664508.2 | Dock9           | 1.03 | -    | 0.82337 | -       |
| 2883 | IPI00896689.1 | Dock9           | 1.03 | -    | 0.82337 | -       |
| 2884 | IPI00462129.4 | Dock9           | 1.03 | 0.74 | 0.82337 | 0.47039 |
| 2885 | IPI00221569.1 | Zadh2           | 0.80 | 1.04 | 0.82506 | 0.87475 |
| 2886 | IPI00830563.1 | Spg7            | 0.98 | -    | 0.82528 | -       |
| 2887 | IPI00830269.1 | Spg7            | 0.98 | 1.27 | 0.82528 | 0.59108 |
| 2888 | IPI00170128.7 | Spg7            | 0.98 | -    | 0.82528 | -       |
| 2889 | IPI00116529.1 | Ptp4a2          | 1.01 | 0.94 | 0.82528 | -       |
| 2890 | IPI00124291.1 | Vps45           | 0.93 | 1.01 | 0.82549 | 0.97404 |
| 2891 | IPI00830613.1 | Epb4.1l1        | 0.96 | 0.96 | 0.82840 | -       |
| 2892 | IPI00129572.1 | Pcdhgc5;Pcdhga1 | 0.97 | 0.97 | 0.82882 | 0.95675 |
| 2893 | IPI00881750.1 | Ndufb5          | 1.08 | -    | 0.83018 | -       |
| 2894 | IPI00118143.1 | Cttn            | 0.87 | -    | 0.83131 | -       |
| 2895 | IPI00121977.3 | Cttn            | 0.87 | 0.88 | 0.83131 | 0.45837 |
| 2896 | IPI00624988.4 | Cttn            | 0.87 | -    | 0.83131 | -       |
| 2897 | IPI00318012.6 | Itfg1           | 0.93 | 1.08 | 0.83504 | 0.49947 |
| 2898 | IPI00131406.1 | Psma7           | 1.05 | 1.09 | 0.83504 | 0.78252 |
| 2899 | IPI00330688.3 | Mrps7           | 1.02 | 1.06 | 0.83687 | 0.68643 |
| 2900 | IPI00169788.1 | Prkar2a         | 0.96 | 0.87 | 0.83746 | 0.63734 |
| 2901 | IPI00132762.1 | Trap1           | 1.04 | 1.06 | 0.83931 | 0.71743 |
| 2902 | IPI00133418.1 | Scg2            | 1.04 | 1.00 | 0.84080 | 0.99283 |
| 2903 | IPI00649373.1 | Git1            | 1.02 | 0.93 | 0.84176 | 0.51958 |
| 2904 | IPI00470095.1 | Git1            | 1.02 | -    | 0.84176 | -       |
| 2905 | IPI00117379.3 | Atox1           | 1.07 | 0.34 | 0.84176 | 0.71028 |
| 2906 | IPI00470152.2 | Ubb;Rps27a;Ubc; | 0.97 | -    | 0.84338 | -       |
| 2907 | IPI00850023.1 | LOC100046746    | 1.06 | 1.10 | 0.84655 | 0.69343 |
| 2908 | IPI00408176.2 | Csnk2a1;Gm1003  | 1.01 | 0.96 | 0.84734 | 0.80824 |
| 2909 | IPI00122396.1 | Smpd3           | 0.92 | 0.97 | 0.84939 | 0.9364  |



|      |               |                |      |      |         |         |
|------|---------------|----------------|------|------|---------|---------|
| 2910 | IPI00224109.2 | Hsph1          | 0.96 | 0.93 | 0.85134 | 0.801   |
| 2911 | IPI00467495.4 | Gmfb           | 0.97 | 1.06 | 0.85134 | 0.63129 |
| 2912 | IPI00119131.2 | Cyb5r1         | 0.84 | 0.86 | 0.85151 | 0.35843 |
| 2913 | IPI00759913.1 | Ktn1           | 0.91 | -    | 0.85151 | -       |
| 2914 | IPI00122559.3 | Ktn1           | 0.91 | -    | 0.85151 | -       |
| 2915 | IPI00759972.1 | Ktn1           | 0.91 | -    | 0.85151 | -       |
| 2916 | IPI00759851.1 | Ktn1           | 0.91 | 1.10 | 0.85151 | 0.7441  |
| 2917 | IPI00407517.2 | Ktn1           | 0.91 | -    | 0.85151 | -       |
| 2918 | IPI00759916.1 | Ktn1           | 0.91 | -    | 0.85151 | -       |
| 2919 | IPI00760049.1 | Ktn1           | 0.91 | -    | 0.85151 | -       |
| 2920 | IPI00760053.1 | Ktn1           | 0.91 | -    | 0.85151 | -       |
| 2921 | IPI00221796.1 | Pcbp2          | 0.94 | 1.21 | 0.85151 | 0.63837 |
| 2922 | IPI00850217.1 | LOC100046119   | 0.97 | 0.97 | 0.85151 | 0.82256 |
| 2923 | IPI00165854.3 | Ube2n          | 0.97 | -    | 0.85151 | -       |
| 2924 | IPI00315280.5 | Sema7a         | 1.05 | 1.87 | 0.85151 | 0.4071  |
| 2925 | IPI00648155.1 | Asph           | 1.09 | -    | 0.85151 | -       |
| 2926 | IPI00648378.1 | Asph           | 1.09 | -    | 0.85151 | -       |
| 2927 | IPI00649615.1 | Asph           | 1.09 | -    | 0.85151 | -       |
| 2928 | IPI00649881.1 | Asph           | 1.09 | -    | 0.85151 | -       |
| 2929 | IPI00624896.4 | Asph           | 1.09 | 0.92 | 0.85151 | -       |
| 2930 | IPI00662793.4 | Asph           | 1.09 | -    | 0.85151 | -       |
| 2931 | IPI00647977.1 | Asph           | 1.09 | -    | 0.85151 | -       |
| 2932 | IPI00474904.3 | Asph           | 1.09 | -    | 0.85151 | -       |
| 2933 | IPI00462445.2 | Nedd4          | 0.90 | 0.96 | 0.85467 | 0.81227 |
| 2934 | IPI00109213.1 | Slc8a1         | 0.93 | -    | 0.85580 | -       |
| 2935 | IPI00407954.2 | Rap1b;LOC10004 | 1.04 | 0.98 | 0.85580 | 0.96994 |
| 2936 | IPI00468633.3 | Slc6a9         | 0.93 | 0.94 | 0.85656 | 0.86978 |
| 2937 | IPI00890277.1 | Slc6a9         | 0.93 | -    | 0.85656 | -       |
| 2938 | IPI00122101.5 | Slc6a9         | 0.93 | -    | 0.85656 | -       |
| 2939 | IPI00404545.2 | Nedd4l         | 1.10 | -    | 0.85656 | -       |
| 2940 | IPI00762565.1 | Asph           | 0.92 | -    | 0.85775 | -       |
| 2941 | IPI00649469.1 | Asph           | 0.92 | -    | 0.85775 | -       |
| 2942 | IPI00473653.1 | Asph           | 0.92 | -    | 0.85775 | -       |
| 2943 | IPI00474131.2 | Asph           | 0.92 | -    | 0.85775 | -       |
| 2944 | IPI00648861.5 | Asph           | 0.92 | -    | 0.85775 | -       |
| 2945 | IPI00649215.1 | Asph           | 0.92 | -    | 0.85775 | -       |
| 2946 | IPI00458833.4 | Asph           | 0.92 | -    | 0.85775 | -       |
| 2947 | IPI00460133.3 | Asph           | 0.92 | -    | 0.85775 | -       |
| 2948 | IPI00649726.1 | Asph           | 0.92 | -    | 0.85775 | -       |
| 2949 | IPI00323800.6 | Nefm           | 0.94 | 1.16 | 0.85775 | 0.59352 |
| 2950 | IPI00315488.1 | Rars           | 0.97 | 1.10 | 0.85775 | 0.8055  |
| 2951 | IPI00226932.2 | C230096C10Rik  | 1.05 | 1.00 | 0.85775 | 0.97801 |
| 2952 | IPI00720171.2 | C230096C10Rik  | 1.05 | -    | 0.85775 | -       |
| 2953 | IPI00623259.1 | Vps52          | 0.96 | 0.97 | 0.85894 | 0.88431 |
| 2954 | IPI00121559.2 | Pnkd           | 0.96 | -    | 0.85956 | -       |
| 2955 | IPI00130670.1 | Strap          | 0.89 | -    | 0.85990 | -       |
| 2956 | IPI00111953.1 | Bola1          | 1.13 | 1.13 | 0.86030 | -       |
| 2957 | IPI00133719.1 | Kcna1          | 0.69 | 0.80 | 0.86260 | 0.37683 |
| 2958 | IPI00853859.1 | Sec31a         | 0.97 | 1.07 | 0.86260 | -       |
| 2959 | IPI00468859.3 | Fads1          | 0.91 | 0.90 | 0.86263 | 0.87149 |
| 2960 | IPI00461823.2 | Saps2          | 0.82 | 1.03 | 0.86307 | 0.93608 |
| 2961 | IPI00604947.6 | Trio           | 0.97 | -    | 0.86307 | -       |

|      |                        |                 |      |      |         |         |
|------|------------------------|-----------------|------|------|---------|---------|
| 2962 | IPI00943997.1          | Trio            | 0.97 | 0.71 | 0.86307 | -       |
| 2963 | IPI00944152.1          | Trio            | 0.97 | -    | 0.86307 | -       |
| 2964 | IPI00828306.2          | Trio            | 0.97 | 0.85 | 0.86307 | -       |
| 2965 | IPI00480432.2          | Rab11fp5        | 1.02 | 0.97 | 0.86326 | 0.91346 |
| 2966 | IPI00467840.2          | Clpb            | 0.96 | 0.95 | 0.86952 | -       |
| 2967 | IPI00664442.3          | Slc4a7          | 1.17 | 1.22 | 0.87231 | 0.37683 |
| 2968 | IPI00225306.2          | Slc4a7          | 1.17 | -    | 0.87231 | -       |
| 2969 | IPI00918973.1          | Strap           | 0.92 | 0.95 | 0.87300 | 0.66898 |
| 2970 | IPI00122232.1          | Tubg2           | 1.06 | -    | 0.87466 | -       |
| 2971 | IPI00321243.1          | Tmcc2           | 1.06 | -    | 0.87734 | -       |
| 2972 | IPI00880305.1          | Tmcc2           | 1.06 | 1.61 | 0.87734 | -       |
| 2973 | contaminant_GR78_YEAST |                 | 0.98 | 1.05 | 0.87834 | 0.82911 |
| 2974 | IPI00346073.1          | Hspa1b          | 1.05 | 1.02 | 0.87834 | -       |
| 2975 | IPI00798482.19         | Hspa1a          | 1.05 | 0.80 | 0.87834 | -       |
| 2976 | IPI00875197.1          | Pskb5           | 1.05 | 0.96 | 0.87945 | 0.90308 |
| 2977 | IPI00120199.1          | Pmpca           | 0.96 | 1.33 | 0.88190 | 0.37683 |
| 2978 | IPI00785470.1          | Hsd17b12        | 0.97 | 1.01 | 0.88190 | -       |
| 2979 | IPI00420870.4          | Ogt             | 0.97 | -    | 0.88190 | -       |
| 2980 | IPI00845528.1          | Ogt             | 0.97 | 0.85 | 0.88190 | 0.62108 |
| 2981 | IPI00462461.2          | Dpp9            | 1.03 | -    | 0.88190 | -       |
| 2982 | IPI00127172.3          | Ddx1            | 1.03 | 1.09 | 0.88190 | 0.45615 |
| 2983 | IPI00881277.1          | Prepl           | 0.89 | -    | 0.88274 | -       |
| 2984 | IPI00875132.2          | Prepl           | 0.89 | 1.20 | 0.88274 | 0.38574 |
| 2985 | IPI00224078.1          | Prepl           | 0.89 | -    | 0.88274 | -       |
| 2986 | IPI00133047.1          | Gm5900;Mapksp   | 1.03 | 1.16 | 0.88274 | 0.49522 |
| 2987 | IPI00123604.4          | Rpsa;mCG_12253  | 1.06 | -    | 0.88449 | -       |
| 2988 | IPI00622968.1          | Gm9819          | 1.06 | 1.10 | 0.88449 | 0.5754  |
| 2989 | IPI00128857.1          | Me1             | 0.92 | -    | 0.88529 | -       |
| 2990 | IPI00938457.1          | Sec31a          | 0.97 | 0.98 | 0.88615 | 0.91335 |
| 2991 | IPI00857468.1          | Cntn4           | 1.09 | -    | 0.88718 | -       |
| 2992 | IPI00113257.3          | Ube2v1;Tmem18   | 0.93 | -    | 0.88750 | -       |
| 2993 | IPI00649730.1          | 4-Sep           | 0.91 | -    | 0.88815 | -       |
| 2994 | IPI00123219.1          | 4-Sep           | 0.91 | -    | 0.88815 | -       |
| 2995 | IPI00341299.1          | 4-Sep           | 0.91 | 1.66 | 0.88815 | 0.37683 |
| 2996 | IPI00654180.1          | Ppp2r5e         | 1.04 | 0.86 | 0.89151 | 0.50028 |
| 2997 | IPI00224697.1          | Ppp2r5e         | 1.04 | 0.89 | 0.89151 | -       |
| 2998 | IPI00136716.1          | Grm3            | 1.01 | 0.82 | 0.89316 | 0.44852 |
| 2999 | IPI00124149.1          | Nutf2;Gm10333;C | 0.97 | -    | 0.89664 | -       |
| 3000 | IPI00886324.1          | Cc2d1a          | 1.03 | -    | 0.89787 | -       |
| 3001 | IPI00321848.6          | Cc2d1a          | 1.03 | -    | 0.89787 | -       |
| 3002 | IPI00474925.1          | Cc2d1a          | 1.03 | -    | 0.89787 | -       |
| 3003 | IPI00132475.2          | Lman1           | 0.98 | 1.20 | 0.90058 | 0.53529 |
| 3004 | IPI00330303.7          | Atic;LOC1000469 | 0.97 | 0.86 | 0.90095 | 0.51784 |
| 3005 | IPI00122032.4          | Reep2           | 0.99 | 1.11 | 0.90198 | 0.35843 |
| 3006 | IPI00850795.1          | Gm11517         | 0.97 | 1.06 | 0.90292 | -       |
| 3007 | IPI00119058.1          | Grb2            | 1.02 | 1.08 | 0.90456 | -       |
| 3008 | IPI00109033.3          | Fam54b          | 1.03 | 1.08 | 0.90680 | 0.60086 |
| 3009 | IPI00126762.1          | Csnk2b          | 1.03 | 0.84 | 0.90680 | 0.54845 |
| 3010 | IPI00845803.1          | Snca            | 0.95 | 1.06 | 0.90717 | 0.75733 |
| 3011 | IPI00944078.1          | 2310057J16Rik   | 0.95 | -    | 0.90747 | -       |
| 3012 | IPI00554840.2          | 2310057J16Rik   | 0.95 | 1.14 | 0.90747 | 0.74093 |
| 3013 | IPI00225761.5          | 2310057J16Rik   | 0.95 | -    | 0.90747 | -       |

|      |               |              |      |      |         |         |
|------|---------------|--------------|------|------|---------|---------|
| 3014 | IPI00623970.3 | Htt          | 0.83 | 0.96 | 0.91137 | -       |
| 3015 | IPI00135390.2 | Coro7        | 0.99 | 1.20 | 0.91231 | 0.53578 |
| 3016 | IPI00754545.2 | Gm2423       | 1.01 | -    | 0.91339 | -       |
| 3017 | IPI00480399.1 | Ablim1       | 0.91 | -    | 0.91386 | -       |
| 3018 | IPI00480306.1 | Cntn4        | 1.06 | 1.89 | 0.91409 | 0.3547  |
| 3019 | IPI00228295.2 | Cntn4        | 1.06 | -    | 0.91409 | -       |
| 3020 | IPI00314844.2 | Twf1         | 1.05 | 0.97 | 0.91513 | 0.93022 |
| 3021 | IPI00137730.7 | Pebp1        | 1.02 | 0.85 | 0.91630 | 0.5166  |
| 3022 | IPI00132443.3 | Hnrnrm       | 1.05 | -    | 0.91630 | -       |
| 3023 | IPI00918137.1 | Hnrnrm       | 1.05 | -    | 0.91630 | -       |
| 3024 | IPI00480357.6 | Hnrnrm       | 1.05 | 1.20 | 0.91630 | 0.50515 |
| 3025 | IPI00919164.1 | Hnrnrm       | 1.05 | -    | 0.91630 | -       |
| 3026 | IPI00135106.2 | Mobp         | 0.94 | 0.82 | 0.91757 | 0.45615 |
| 3027 | IPI00387192.4 | Tmem49       | 1.03 | 1.03 | 0.91800 | 0.88143 |
| 3028 | IPI00124479.2 | Kif2a        | 0.96 | 0.99 | 0.91844 | -       |
| 3029 | IPI00170093.3 | Ndufs8       | 1.04 | 1.06 | 0.91844 | 0.67818 |
| 3030 | IPI00411116.4 | Ube2d3       | 0.94 | -    | 0.92064 | -       |
| 3031 | IPI00125135.1 | Ube2d2       | 0.94 | -    | 0.92064 | -       |
| 3032 | IPI00608114.2 | Mycbp2       | 1.04 | 0.08 | 0.92088 | -       |
| 3033 | IPI00380409.1 | Mycbp2       | 1.04 | -    | 0.92088 | -       |
| 3034 | IPI00890139.1 | Eps15l1      | 0.98 | 1.08 | 0.92118 | 0.63364 |
| 3035 | IPI00420185.1 | Eps15l1      | 0.98 | -    | 0.92118 | -       |
| 3036 | IPI00387580.1 | Add3         | 0.98 | 1.15 | 0.92118 | -       |
| 3037 | IPI00387559.1 | Add3         | 0.98 | -    | 0.92118 | -       |
| 3038 | IPI00153107.3 | Blmh         | 1.04 | 0.97 | 0.92118 | 0.93505 |
| 3039 | IPI00348414.4 | Ado          | 1.05 | 0.83 | 0.92118 | 0.75164 |
| 3040 | IPI00875866.1 | Dnajc5       | 0.97 | 0.80 | 0.92211 | -       |
| 3041 | IPI00453798.3 | Tmx3         | 0.97 | 1.13 | 0.92278 | 0.42841 |
| 3042 | IPI00112948.2 | Rtn3         | 1.03 | 1.05 | 0.92637 | 0.84603 |
| 3043 | IPI00123518.1 | Lypla2       | 0.98 | 1.13 | 0.92808 | 0.73026 |
| 3044 | IPI00319973.3 | Pgrmc1       | 1.02 | 1.06 | 0.92808 | 0.69436 |
| 3045 | IPI00227773.1 | Ppp1cc       | 1.02 | 0.89 | 0.92808 | 0.5691  |
| 3046 | IPI00123862.1 | Ppp1cc       | 1.02 | -    | 0.92808 | -       |
| 3047 | IPI00420909.1 | Slc6a7       | 1.04 | 0.85 | 0.92808 | 0.82176 |
| 3048 | IPI00153642.1 | Ubqln1       | 1.04 | 0.87 | 0.92808 | -       |
| 3049 | IPI00230194.5 | Gng2         | 1.03 | 0.88 | 0.93098 | 0.35616 |
| 3050 | IPI00227805.6 | Pfn2         | 0.97 | -    | 0.93187 | -       |
| 3051 | IPI00881395.1 | Pfn2         | 0.97 | -    | 0.93187 | -       |
| 3052 | IPI00228645.5 | Pfn2         | 0.97 | 0.87 | 0.93187 | 0.73026 |
| 3053 | IPI00187510.2 | Tnik         | 0.98 | -    | 0.93187 | -       |
| 3054 | IPI00885391.1 | Tnik         | 0.98 | -    | 0.93187 | -       |
| 3055 | IPI00885953.1 | Tnik         | 0.98 | -    | 0.93187 | -       |
| 3056 | IPI00625974.2 | Tnik         | 0.98 | 0.89 | 0.93187 | -       |
| 3057 | IPI00885634.1 | Tnik         | 0.98 | -    | 0.93187 | -       |
| 3058 | IPI00889833.1 | Ubqln2       | 1.02 | 1.29 | 0.93187 | 0.79785 |
| 3059 | IPI00387416.1 | Ubqln2       | 1.02 | -    | 0.93187 | -       |
| 3060 | IPI00750671.1 | Dynlrb1      | 1.03 | 0.94 | 0.93187 | 0.6116  |
| 3061 | IPI00315225.7 | Dynlrb1      | 1.03 | -    | 0.93187 | -       |
| 3062 | IPI00115824.1 | Nipsnap1     | 1.04 | 0.98 | 0.93187 | 0.88732 |
| 3063 | IPI00850402.1 | LOC100044896 | 1.00 | -    | 0.93188 | -       |
| 3064 | IPI00135452.2 | Sdc3         | 1.06 | 0.84 | 0.93218 | 0.68476 |
| 3065 | IPI00340519.3 | Prkab2       | 1.02 | -    | 0.93335 | -       |

|      |                |                |      |      |         |         |
|------|----------------|----------------|------|------|---------|---------|
| 3066 | IPI00885470.1  | Prkab2         | 1.02 | 1.50 | 0.93335 | -       |
| 3067 | IPI00222044.1  | Fam49a         | 0.94 | 0.92 | 0.93403 | 0.72494 |
| 3068 | IPI00230035.7  | Ddx3x          | 0.97 | 1.13 | 0.93403 | 0.38642 |
| 3069 | IPI00123342.4  | Hyou1          | 0.99 | 0.97 | 0.93403 | 0.83925 |
| 3070 | IPI00225961.5  | Phgdh          | 1.01 | 0.80 | 0.93403 | 0.39385 |
| 3071 | IPI00120045.1  | Hspe1-rs1      | 1.02 | -    | 0.93403 | -       |
| 3072 | IPI00263863.8  | Hspe1          | 1.02 | 0.95 | 0.93403 | 0.72815 |
| 3073 | IPI00263013.4  | Plp1           | 1.00 | 0.80 | 0.93515 | 0.35616 |
| 3074 | IPI00230427.5  | Mif            | 0.98 | 0.87 | 0.93577 | 0.54013 |
| 3075 | IPI00463909.3  | Huwe1          | 1.02 | -    | 0.93815 | -       |
| 3076 | IPI00655012.2  | Huwe1          | 1.02 | 0.91 | 0.93815 | -       |
| 3077 | IPI00380785.16 | Slc9a1         | 1.04 | 0.55 | 0.94067 | -       |
| 3078 | IPI00622815.2  | Slc9a1         | 1.04 | 0.76 | 0.94067 | 0.38012 |
| 3079 | IPI00474386.1  | Add3           | 0.98 | 0.85 | 0.94377 | 0.61297 |
| 3080 | IPI00119219.2  | Hsd17b12       | 0.99 | 0.99 | 0.94380 | 0.98889 |
| 3081 | IPI00400328.3  | Add2           | 0.98 | 0.92 | 0.94550 | -       |
| 3082 | IPI00753534.3  | Slc22a23       | 1.04 | 1.33 | 0.94577 | 0.82227 |
| 3083 | IPI00380443.4  | Slc22a23       | 1.04 | -    | 0.94577 | -       |
| 3084 | IPI00129519.3  | Basp1          | 0.99 | 1.00 | 0.94586 | 0.99268 |
| 3085 | IPI00890230.1  | Ccdc47         | 1.02 | -    | 0.94586 | -       |
| 3086 | IPI00310518.3  | Ccdc47         | 1.02 | 1.22 | 0.94586 | 0.38642 |
| 3087 | IPI00648479.2  | Ccdc47         | 1.02 | 1.05 | 0.94586 | -       |
| 3088 | IPI00776164.1  | Map2k2         | 0.96 | -    | 0.94657 | -       |
| 3089 | IPI00755513.2  | Map2k2         | 0.96 | 0.94 | 0.94657 | 0.83925 |
| 3090 | IPI00135708.1  | Map2k2         | 0.96 | -    | 0.94657 | -       |
| 3091 | IPI00118131.6  | Ppp2r5c        | 1.03 | -    | 0.94841 | -       |
| 3092 | IPI00408024.1  | Ppp2r5c        | 1.03 | 0.66 | 0.94841 | -       |
| 3093 | IPI00808115.1  | Cd200          | 1.08 | -    | 0.94907 | -       |
| 3094 | IPI00108388.1  | Usp9x          | 0.98 | -    | 0.95104 | -       |
| 3095 | IPI00759943.1  | Ktn1           | 0.98 | -    | 0.95104 | -       |
| 3096 | IPI00760076.1  | Ktn1           | 0.98 | -    | 0.95104 | -       |
| 3097 | IPI00759952.1  | Ktn1           | 0.98 | -    | 0.95104 | -       |
| 3098 | IPI00759887.1  | Ktn1           | 0.98 | -    | 0.95104 | -       |
| 3099 | IPI00759936.1  | Ktn1           | 0.98 | -    | 0.95104 | -       |
| 3100 | IPI00230707.6  | Ywhag          | 1.01 | 0.99 | 0.95104 | 0.9364  |
| 3101 | IPI00128360.1  | Ntrk2          | 1.02 | -    | 0.95104 | -       |
| 3102 | IPI00132089.2  | Prep           | 1.02 | 0.97 | 0.95104 | 0.85539 |
| 3103 | IPI00648298.2  | Ptpnf          | 1.03 | 1.09 | 0.95104 | -       |
| 3104 | IPI00109212.3  | Snx2           | 1.03 | 1.16 | 0.95104 | 0.61123 |
| 3105 | IPI00228907.3  | Elmod1         | 1.09 | 1.23 | 0.95104 | 0.47039 |
| 3106 | IPI00228385.5  | G6pdx          | 0.96 | 0.94 | 0.95136 | 0.73026 |
| 3107 | IPI00132504.1  | Mrps30         | 0.98 | 1.29 | 0.95136 | 0.35843 |
| 3108 | IPI00113686.2  | Gtf2i          | 1.01 | -    | 0.95136 | -       |
| 3109 | IPI00761775.1  | Gtf2i          | 1.01 | -    | 0.95136 | -       |
| 3110 | IPI00229538.3  | Gtf2i          | 1.01 | -    | 0.95136 | -       |
| 3111 | IPI00229536.4  | Gtf2i          | 1.01 | -    | 0.95136 | -       |
| 3112 | IPI00229535.2  | Gtf2i          | 1.01 | 1.11 | 0.95136 | 0.35843 |
| 3113 | IPI00876528.1  | Gtf2i          | 1.01 | -    | 0.95136 | -       |
| 3114 | IPI00395163.1  | Gtf2i          | 1.01 | -    | 0.95136 | -       |
| 3115 | IPI00115949.1  | Gm6969;Cox7a2l | 1.02 | -    | 0.95178 | -       |
| 3116 | IPI00930806.1  | Cox7a2l        | 1.02 | -    | 0.95178 | -       |
| 3117 | IPI00120136.1  | Cox7a2l        | 1.02 | 1.82 | 0.95178 | 0.52558 |

|      |               |                |      |      |         |         |
|------|---------------|----------------|------|------|---------|---------|
| 3118 | IPI00869473.1 | Ccdc132        | 0.98 | -    | 0.95416 | -       |
| 3119 | IPI00869359.1 | Ccdc132        | 0.98 | 0.77 | 0.95416 | 0.59365 |
| 3120 | IPI00621085.3 | Ccdc132        | 0.98 | -    | 0.95416 | -       |
| 3121 | IPI00130419.1 | Prkce          | 1.01 | 0.92 | 0.95515 | 0.73026 |
| 3122 | IPI00890117.1 | Cfl1           | 1.01 | 0.96 | 0.96111 | 0.76773 |
| 3123 | IPI00848816.1 | LOC100048522   | 0.98 | -    | 0.96439 | -       |
| 3124 | IPI00606731.1 | Dpp9           | 0.99 | -    | 0.96439 | -       |
| 3125 | IPI00649043.1 | Celsr2         | 0.99 | 1.28 | 0.96439 | -       |
| 3126 | IPI00649549.2 | Celsr2         | 0.99 | -    | 0.96439 | -       |
| 3127 | IPI00850704.1 | Celsr2         | 0.99 | -    | 0.96439 | -       |
| 3128 | IPI00313878.3 | Celsr2         | 0.99 | -    | 0.96439 | -       |
| 3129 | IPI00407863.6 | Clasp2         | 1.02 | 0.84 | 0.96439 | -       |
| 3130 | IPI00830860.1 | Clasp2         | 1.02 | 0.79 | 0.96439 | 0.47039 |
| 3131 | IPI00229080.7 | Hsp90ab1       | 1.01 | 1.13 | 0.96591 | 0.50515 |
| 3132 | IPI00319965.3 | Psm6           | 0.98 | 0.87 | 0.96914 | 0.59331 |
| 3133 | IPI00330323.1 | Mogs           | 0.98 | 1.10 | 0.96914 | 0.63926 |
| 3134 | IPI00816951.1 | Hdac5          | 0.99 | -    | 0.96914 | -       |
| 3135 | IPI00856588.1 | Hdac5          | 0.99 | -    | 0.96914 | -       |
| 3136 | IPI00283913.5 | Hdac5          | 0.99 | -    | 0.96914 | -       |
| 3137 | IPI00649981.1 | Hdac5          | 0.99 | -    | 0.96914 | -       |
| 3138 | IPI00555143.4 | Ppfia2         | 0.99 | -    | 0.96914 | -       |
| 3139 | IPI00323179.3 | Gdi1           | 1.00 | 0.95 | 0.96914 | 0.8044  |
| 3140 | IPI00453946.2 | Pnkd           | 1.00 | -    | 0.96914 | -       |
| 3141 | IPI00464245.3 | Pnkd           | 1.00 | -    | 0.96914 | -       |
| 3142 | IPI00136251.1 | Dnaja2         | 1.00 | 0.87 | 0.96914 | 0.51296 |
| 3143 | IPI00875669.2 | Lphn1          | 1.01 | 0.86 | 0.96914 | 0.59331 |
| 3144 | IPI00816879.1 | Lphn1          | 1.01 | -    | 0.96914 | -       |
| 3145 | IPI00623958.3 | Lphn1          | 1.01 | -    | 0.96914 | -       |
| 3146 | IPI00119517.3 | Cask           | 1.01 | -    | 0.96914 | -       |
| 3147 | IPI00776341.2 | Cask           | 1.01 | -    | 0.96914 | -       |
| 3148 | IPI00776307.2 | Cask           | 1.01 | 0.80 | 0.96914 | 0.49522 |
| 3149 | IPI00623542.3 | Slc8a1         | 0.99 | 0.87 | 0.97032 | 0.5754  |
| 3150 | IPI00321378.3 | Picalm         | 0.99 | 1.01 | 0.97032 | -       |
| 3151 | IPI00115475.1 | Ufsp2          | 1.00 | 1.08 | 0.97195 | 0.91077 |
| 3152 | IPI00130840.7 | Cope           | 0.99 | -    | 0.97243 | -       |
| 3153 | IPI00553576.3 | Abcd3          | 1.00 | 1.05 | 0.97341 | 0.76773 |
| 3154 | IPI00135646.1 | Abcd3          | 1.00 | -    | 0.97341 | -       |
| 3155 | IPI00112536.1 | Scrn1          | 1.00 | 0.93 | 0.97437 | 0.75245 |
| 3156 | IPI00623897.3 | D630045J12Rik  | 1.01 | 0.82 | 0.97860 | -       |
| 3157 | IPI00380953.6 | AW555464       | 1.02 | 0.79 | 0.97860 | 0.43541 |
| 3158 | IPI00131309.1 | Tubg1          | 0.99 | 0.76 | 0.97872 | -       |
| 3159 | IPI00955119.1 | Atp13a1        | 1.02 | 0.98 | 0.97916 | -       |
| 3160 | IPI00109891.1 | Atp13a1        | 1.02 | -    | 0.97916 | -       |
| 3161 | IPI00262349.2 | Cpne7          | 1.01 | -    | 0.98128 | -       |
| 3162 | IPI00421206.1 | Kctd12         | 1.01 | 1.24 | 0.98264 | 0.47605 |
| 3163 | IPI00316650.1 | Exoc7          | 0.98 | -    | 0.98353 | -       |
| 3164 | IPI00648959.1 | Exoc7          | 0.98 | 1.02 | 0.98353 | -       |
| 3165 | IPI00405742.6 | Plxnb2         | 0.99 | -    | 0.98520 | -       |
| 3166 | IPI00323134.1 | Cdh2           | 1.01 | -    | 0.98520 | -       |
| 3167 | IPI00830707.1 | Cdh2           | 1.01 | -    | 0.98520 | -       |
| 3168 | IPI00749860.1 | Cdh2;LOC100044 | 1.01 | 0.75 | 0.98520 | 0.37683 |
| 3169 | IPI00473215.6 | Pitpnc1        | 1.01 | 1.40 | 0.98614 | 0.50578 |

|      |               |               |      |      |         |         |
|------|---------------|---------------|------|------|---------|---------|
| 3170 | IPI00742400.1 | Prkacb        | 1.00 | -    | 0.98708 | -       |
| 3171 | IPI00263822.7 | Prkacb        | 1.00 | -    | 0.98708 | -       |
| 3172 | IPI00742438.1 | Prkacb        | 1.00 | -    | 0.98708 | -       |
| 3173 | IPI00742329.1 | Prkacb        | 1.00 | 0.95 | 0.98708 | 0.87469 |
| 3174 | IPI00623842.4 | Atp13a1       | 1.01 | -    | 0.98708 | -       |
| 3175 | IPI00459279.2 | Qdpr          | 1.00 | 0.82 | 0.98808 | 0.35843 |
| 3176 | IPI00330619.3 | Vac14         | 1.01 | 0.98 | 0.98864 | 0.85412 |
| 3177 | IPI00760003.1 | Ktn1          | 1.01 | -    | 0.98877 | -       |
| 3178 | IPI00760078.1 | Ktn1          | 1.01 | -    | 0.98877 | -       |
| 3179 | IPI00473546.4 | Ktn1          | 1.01 | 1.09 | 0.98877 | -       |
| 3180 | IPI00877244.1 | Kif1a         | 0.99 | 0.87 | 0.98880 | 0.5772  |
| 3181 | IPI00133212.1 | Golt1b        | 1.00 | 1.28 | 0.98884 | -       |
| 3182 | IPI00281673.6 | Lhfp14        | 0.99 | -    | 0.99221 | -       |
| 3183 | IPI00122346.3 | Ssr4          | 0.99 | -    | 0.99221 | -       |
| 3184 | IPI00953773.1 | Ssr4          | 0.99 | 0.98 | 0.99221 | 0.97441 |
| 3185 | IPI00123542.1 | Grid1         | 0.99 | -    | 0.99334 | -       |
| 3186 | IPI00856177.1 | Grid1         | 0.99 | 0.53 | 0.99334 | 0.3937  |
| 3187 | IPI00270326.1 | Psmc2         | 0.99 | 0.98 | 0.99334 | 0.96421 |
| 3188 | IPI00223415.4 | Nars          | 1.00 | -    | 0.99374 | -       |
| 3189 | IPI00918997.1 | Nars          | 1.00 | 1.08 | 0.99374 | 0.71119 |
| 3190 | IPI00457543.3 | Ppp2r5c       | 1.01 | -    | 0.99743 | -       |
| 3191 | IPI00466617.1 | Ppp2r5c       | 1.01 | -    | 0.99743 | -       |
| 3192 | IPI00265386.5 | Faf2          | 1.00 | 0.94 | 1.00000 | 0.84174 |
| 3193 | IPI00928350.1 | Myo5a         | 1.00 | -    | 1.00000 | -       |
| 3194 | IPI00890268.2 | Myo5a         | 1.00 | 1.07 | 1.00000 | 0.65064 |
| 3195 | IPI00928007.1 | Myo5a         | 1.00 | 1.08 | 1.00000 | 0.73026 |
| 3196 | IPI00225670.1 | Gphn          | 1.00 | -    | 1.00000 | -       |
| 3197 | IPI00816946.1 | Gphn          | 1.00 | 0.86 | 1.00000 | 0.45615 |
| 3198 | IPI00321310.1 | Tssc1         | 1.00 | 0.97 | 1.00000 | -       |
| 3199 | IPI00223818.2 | Agps          | 0.04 | -    | -       | -       |
| 3200 | IPI00756601.2 | Agps          | 0.04 | 0.98 | -       | -       |
| 3201 | IPI00849948.1 | Gm14289;Gm144 | 0.05 | -    | -       | -       |
| 3202 | IPI00274175.1 | Gm5121        | 0.05 | -    | -       | -       |
| 3203 | IPI00671398.1 | -             | 0.05 | -    | -       | -       |
| 3204 | IPI00406624.2 | Mgea5         | 0.05 | -    | -       | -       |
| 3205 | IPI00655175.2 | Mgea5         | 0.05 | 1.00 | -       | 0.98413 |
| 3206 | IPI00420290.2 | Robo2         | 0.06 | -    | -       | -       |
| 3207 | IPI00453679.2 | O610010K06Rik | 0.07 | 0.85 | -       | -       |
| 3208 | IPI00408556.1 | Gm5578        | 0.07 | -    | -       | -       |
| 3209 | IPI00129504.1 | Timm17b       | 0.08 | -    | -       | -       |
| 3210 | IPI00776232.2 | Timm17b       | 0.08 | 0.81 | -       | -       |
| 3211 | IPI00875749.1 | Robo2         | 0.09 | -    | -       | -       |
| 3212 | IPI00882112.1 | Robo2         | 0.09 | -    | -       | -       |
| 3213 | IPI00776029.2 | Robo2         | 0.09 | -    | -       | -       |
| 3214 | IPI00222053.1 | Neo1          | 0.10 | -    | -       | -       |
| 3215 | IPI00222052.1 | Neo1          | 0.10 | -    | -       | -       |
| 3216 | IPI00129159.1 | Neo1          | 0.10 | -    | -       | -       |
| 3217 | IPI00124740.3 | Rem2          | 0.11 | -    | -       | -       |
| 3218 | IPI00128778.1 | Sh3glb1       | 0.14 | 1.00 | -       | 0.99618 |
| 3219 | IPI00122267.3 | Sh3glb1       | 0.14 | -    | -       | -       |
| 3220 | IPI00785417.1 | Stx5a         | 0.17 | -    | -       | -       |
| 3221 | IPI00331533.4 | Stx5a         | 0.17 | -    | -       | -       |

|      |               |                |      |      |   |         |
|------|---------------|----------------|------|------|---|---------|
| 3222 | IPI00405224.2 | Ptpre          | 0.19 | -    | - | -       |
| 3223 | IPI00653215.1 | Ptpre          | 0.19 | -    | - | -       |
| 3224 | IPI00954626.1 | Ptpre          | 0.19 | -    | - | -       |
| 3225 | IPI00654319.2 | Ptpre          | 0.19 | -    | - | -       |
| 3226 | IPI00875454.1 | Chl1           | 0.19 | -    | - | -       |
| 3227 | IPI00222149.4 | Chl1           | 0.19 | -    | - | -       |
| 3228 | IPI00404529.2 | Chl1           | 0.19 | 0.94 | - | -       |
| 3229 | IPI00944141.1 | Rps5           | 0.20 | 1.24 | - | 0.5009  |
| 3230 | IPI00857345.1 | Rps5           | 0.20 | -    | - | -       |
| 3231 | IPI00317376.1 | Kcna4          | 0.21 | 0.87 | - | 0.47039 |
| 3232 | IPI00121102.1 | Kcna4          | 0.21 | -    | - | -       |
| 3233 | IPI00649833.1 | Sept4;Gm11492  | 0.24 | -    | - | -       |
| 3234 | IPI00221865.1 | Rab9b          | 0.24 | 0.83 | - | 0.5765  |
| 3235 | IPI00331707.1 | Hmgcs1;LOC1000 | 0.27 | -    | - | -       |
| 3236 | IPI00649441.1 | 4-Sep          | 0.27 | 0.86 | - | -       |
| 3237 | IPI00648822.2 | 4-Sep          | 0.27 | -    | - | -       |
| 3238 | IPI00754923.1 | H13            | 0.27 | -    | - | -       |
| 3239 | IPI00408103.1 | H13            | 0.28 | -    | - | -       |
| 3240 | IPI00670247.3 | Srgap1         | 0.28 | -    | - | -       |
| 3241 | IPI00875883.1 | Srgap1         | 0.28 | 0.65 | - | -       |
| 3242 | IPI00227864.2 | Pafah1b1       | 0.28 | -    | - | -       |
| 3243 | IPI00649157.1 | Stmn1          | 0.28 | -    | - | -       |
| 3244 | IPI00648723.1 | Stmn1          | 0.28 | -    | - | -       |
| 3245 | IPI00131330.9 | Usp32          | 0.29 | -    | - | -       |
| 3246 | IPI00881765.1 | AW551984       | 0.30 | -    | - | -       |
| 3247 | IPI00221591.2 | AW551984       | 0.30 | -    | - | -       |
| 3248 | IPI00460122.1 | AW551984       | 0.30 | -    | - | -       |
| 3249 | IPI00269076.3 | Ak2            | 0.31 | -    | - | -       |
| 3250 | IPI00648318.1 | Ak2            | 0.31 | 1.51 | - | 0.38642 |
| 3251 | IPI00229865.1 | Al413782       | 0.31 | -    | - | -       |
| 3252 | IPI00400395.1 | Al413782       | 0.31 | 1.69 | - | 0.70345 |
| 3253 | IPI00830187.1 | Vangl2         | 0.32 | -    | - | -       |
| 3254 | IPI00154106.3 | Vangl2         | 0.32 | -    | - | -       |
| 3255 | IPI00828796.1 | Ide            | 0.32 | 1.02 | - | 0.88276 |
| 3256 | IPI00720016.2 | Odz1           | 0.32 | 0.84 | - | 0.49947 |
| 3257 | IPI00605812.3 | Odz1           | 0.32 | -    | - | -       |
| 3258 | IPI00119784.1 | Ide            | 0.33 | -    | - | -       |
| 3259 | IPI00674601.1 | Gm6654         | 0.35 | -    | - | -       |
| 3260 | IPI00261455.5 | Gm6654         | 0.35 | -    | - | -       |
| 3261 | IPI00754798.1 | Gm7392         | 0.35 | -    | - | -       |
| 3262 | IPI00377441.3 | Rps26;LOC10004 | 0.35 | 1.15 | - | 0.54506 |
| 3263 | IPI00119959.1 | Banf1          | 0.36 | 1.04 | - | 0.82362 |
| 3264 | IPI00263903.2 | 2610110G12Rik  | 0.37 | 1.03 | - | 0.88233 |
| 3265 | IPI00322313.4 | 2610110G12Rik  | 0.37 | -    | - | -       |
| 3266 | IPI00668433.1 | Prex1          | 0.37 | 1.04 | - | -       |
| 3267 | IPI00675236.1 | Prex1          | 0.37 | 1.85 | - | -       |
| 3268 | IPI00885906.1 | Mllt4          | 0.37 | -    | - | -       |
| 3269 | IPI00875282.1 | -              | 0.38 | -    | - | -       |
| 3270 | IPI00466820.4 | Gm15501;Rps8   | 0.38 | -    | - | -       |
| 3271 | IPI00621229.1 | Gm6998         | 0.38 | 1.07 | - | 0.62701 |
| 3272 | IPI00475203.1 | Gm11353        | 0.38 | 1.26 | - | 0.54845 |
| 3273 | IPI00828628.2 | Rps8           | 0.38 | -    | - | -       |

|      |               |                |      |      |   |         |
|------|---------------|----------------|------|------|---|---------|
| 3274 | IPI00649065.1 | Eri3           | 0.38 | -    | - | -       |
| 3275 | IPI00471104.2 | Eri3           | 0.38 | -    | - | -       |
| 3276 | IPI00828730.1 | 6-Mar          | 0.38 | -    | - | -       |
| 3277 | IPI00222351.3 | 6-Mar          | 0.38 | -    | - | -       |
| 3278 | IPI00403537.4 | 6-Mar          | 0.38 | -    | - | -       |
| 3279 | IPI00126069.7 | Eif2b3         | 0.39 | -    | - | -       |
| 3280 | IPI00672907.1 | Eif2b3         | 0.39 | -    | - | -       |
| 3281 | IPI00648960.2 | Eif2b3         | 0.39 | -    | - | -       |
| 3282 | IPI00895292.1 | -              | 0.39 | -    | - | -       |
| 3283 | IPI00881573.1 | Dgke           | 0.39 | 1.36 | - | -       |
| 3284 | IPI00128436.1 | Dgke           | 0.39 | -    | - | -       |
| 3285 | IPI00894963.1 |                | 0.39 | 1.15 | - | 0.35616 |
| 3286 | IPI00230349.9 | Map1lc3b       | 0.39 | 1.05 | - | 0.83689 |
| 3287 | IPI00831089.3 | Camsap1l1      | 0.39 | 1.32 | - | 0.47364 |
| 3288 | IPI00670928.3 | Camsap1l1      | 0.39 | -    | - | -       |
| 3289 | IPI00885543.1 | Camsap1l1      | 0.39 | -    | - | -       |
| 3290 | IPI00224653.5 | Sec11c         | 0.39 | -    | - | -       |
| 3291 | IPI00880442.1 | Sec11c         | 0.39 | 0.94 | - | -       |
| 3292 | IPI00880865.1 | Sec11c         | 0.39 | -    | - | -       |
| 3293 | IPI00762647.1 | Panx1          | 0.40 | 0.37 | - | -       |
| 3294 | IPI00228875.6 | Panx1          | 0.40 | -    | - | -       |
| 3295 | IPI00954313.1 | Hmga1-rs1;Hmga | 0.40 | -    | - | -       |
| 3296 | IPI00314240.5 | Hmga1-rs1;Hmga | 0.40 | -    | - | -       |
| 3297 | IPI00954304.1 | Hmga1-rs1;Hmga | 0.40 | -    | - | -       |
| 3298 | IPI00130014.3 | Map4k4         | 0.40 | -    | - | -       |
| 3299 | IPI00459269.1 | Hmgcs1         | 0.40 | -    | - | -       |
| 3300 | IPI00120173.1 | Cpne8          | 0.40 | -    | - | -       |
| 3301 | IPI00461712.1 | Chmp7          | 0.40 | 0.90 | - | 0.76381 |
| 3302 | IPI00153445.1 | Chmp7          | 0.40 | -    | - | -       |
| 3303 | IPI00112096.3 | Spcs1          | 0.40 | 1.41 | - | -       |
| 3304 | IPI00223019.2 | Apba1          | 0.40 | -    | - | -       |
| 3305 | IPI00894741.1 | Edc4           | 0.41 | -    | - | -       |
| 3306 | IPI00227299.6 | Vim            | 0.42 | 0.92 | - | 0.82671 |
| 3307 | IPI00857485.1 | Pafah1b3       | 0.43 | 1.18 | - | 0.65135 |
| 3308 | IPI00153176.2 | Fbxo2          | 0.43 | -    | - | -       |
| 3309 | IPI00928009.1 | Pafah1b3       | 0.43 | -    | - | -       |
| 3310 | IPI00118819.1 | Pafah1b3       | 0.43 | -    | - | -       |
| 3311 | IPI00461010.2 | Pafah1b3       | 0.43 | -    | - | -       |
| 3312 | IPI00119762.4 | Dclk1          | 0.43 | -    | - | -       |
| 3313 | IPI00858306.1 | Pa2g4          | 0.43 | -    | - | -       |
| 3314 | IPI00129028.1 | Gm5620         | 0.44 | -    | - | -       |
| 3315 | IPI00458711.2 | Cyp51          | 0.44 | 1.05 | - | 0.8719  |
| 3316 | IPI00850734.1 | Gm15542        | 0.45 | -    | - | -       |
| 3317 | IPI00222135.3 | Trpm3          | 0.45 | -    | - | -       |
| 3318 | IPI00655206.3 | Trpm3          | 0.45 | -    | - | -       |
| 3319 | IPI00654921.1 | Trpm3          | 0.45 | -    | - | -       |
| 3320 | IPI00553571.2 | Trpm3          | 0.45 | 0.77 | - | 0.85059 |
| 3321 | IPI00655008.1 | Trpm3          | 0.45 | -    | - | -       |
| 3322 | IPI00120513.3 | Cops2          | 0.45 | -    | - | -       |
| 3323 | IPI00321581.4 | Snap29         | 0.45 | 1.04 | - | 0.90591 |
| 3324 | IPI00654972.1 | Trpm3          | 0.46 | -    | - | -       |
| 3325 | IPI00465759.3 | Trpm3          | 0.46 | -    | - | -       |



|      |               |               |      |      |   |         |
|------|---------------|---------------|------|------|---|---------|
| 3326 | IPI00420649.4 | 2810407C02Rik | 0.46 | 1.01 | - | 0.98677 |
| 3327 | IPI00757586.2 | Zc3h7b        | 0.46 | 1.07 | - | -       |
| 3328 | IPI00109501.1 | Mrrf          | 0.46 | 0.93 | - | 0.9364  |
| 3329 | IPI00753388.1 | Plcg1         | 0.46 | -    | - | -       |
| 3330 | IPI00121089.2 | Plcg1         | 0.46 | -    | - | -       |
| 3331 | IPI00137594.2 | Map1lc3a      | 0.46 | 0.98 | - | 0.98135 |
| 3332 | IPI00135132.1 | Kif21b        | 0.46 | -    | - | -       |
| 3333 | IPI00471270.3 | Lmtk3         | 0.46 | -    | - | -       |
| 3334 | IPI00881155.1 | Lmtk3         | 0.46 | 0.93 | - | 0.75787 |
| 3335 | IPI00118832.1 | Erp29         | 0.47 | 1.01 | - | 0.97441 |
| 3336 | IPI00129548.5 | Irgq          | 0.48 | 2.00 | - | 0.50543 |
| 3337 | IPI00658614.1 | Gm6549        | 0.48 | -    | - | -       |
| 3338 | IPI00750151.1 | Clip2         | 0.48 | -    | - | -       |
| 3339 | IPI00850320.1 | Gm4581        | 0.49 | -    | - | -       |
| 3340 | IPI00756180.1 | Gm10224       | 0.49 | -    | - | -       |
| 3341 | IPI00126713.3 | Gm13777       | 0.49 | -    | - | -       |
| 3342 | IPI00652316.4 | Srgap2        | 0.49 | -    | - | -       |
| 3343 | IPI00408233.6 | Mast1         | 0.49 | -    | - | -       |
| 3344 | IPI00875301.1 | Mast1         | 0.49 | -    | - | -       |
| 3345 | IPI00919281.1 | 1810035L17Rik | 0.49 | -    | - | -       |
| 3346 | IPI00666885.3 | Dnajc13       | 0.49 | 1.00 | - | 0.98873 |
| 3347 | IPI00331534.3 | Npdc1         | 0.49 | -    | - | -       |
| 3348 | IPI00753649.1 | Npdc1         | 0.49 | -    | - | -       |
| 3349 | IPI00229332.2 | Npdc1         | 0.49 | -    | - | -       |
| 3350 | IPI00762221.2 | -             | 0.50 | -    | - | -       |
| 3351 | IPI00874692.1 | Gm4294        | 0.50 | -    | - | -       |
| 3352 | IPI00473532.1 | Gm10020       | 0.50 | 1.03 | - | -       |
| 3353 | IPI00667252.1 | LOC634785     | 0.50 | -    | - | -       |
| 3354 | IPI00273803.4 | Rpl15         | 0.50 | -    | - | -       |
| 3355 | IPI00123534.1 | Grid2         | 0.50 | 0.52 | - | 0.60679 |
| 3356 | IPI00673707.3 | LOC633677     | 0.50 | 1.08 | - | 0.63926 |
| 3357 | IPI00339916.9 | Eprs          | 0.50 | -    | - | -       |
| 3358 | IPI00466145.4 | Gm12922       | 0.50 | -    | - | -       |
| 3359 | IPI00605141.2 | Gm5921        | 0.50 | -    | - | -       |
| 3360 | IPI00849155.1 | LOC671929     | 0.50 | -    | - | -       |
| 3361 | IPI00850650.1 | Gm6549        | 0.50 | -    | - | -       |
| 3362 | IPI00665910.2 | -             | 0.50 | -    | - | -       |
| 3363 | IPI00378671.3 | Gm5978        | 0.50 | -    | - | -       |
| 3364 | IPI00849782.1 | LOC100044627  | 0.51 | 1.39 | - | 0.2965  |
| 3365 | IPI00755905.1 | Sec16a        | 0.51 | -    | - | -       |
| 3366 | IPI00627000.4 | Sec16a        | 0.51 | -    | - | -       |
| 3367 | IPI00849816.1 | -             | 0.51 | -    | - | -       |
| 3368 | IPI00849994.1 | Gm16468       | 0.51 | -    | - | -       |
| 3369 | IPI00889213.1 | Macf1         | 0.51 | 0.87 | - | -       |
| 3370 | IPI00127227.2 | Cbr4          | 0.51 | 0.95 | - | 0.81108 |
| 3371 | IPI00308706.4 | Rpl5;Gm15500  | 0.51 | 1.33 | - | -       |
| 3372 | IPI00881253.1 | Rpl5          | 0.51 | 1.03 | - | 0.95722 |
| 3373 | IPI00128692.1 | Nsdhl         | 0.52 | 1.43 | - | -       |
| 3374 | IPI00308545.1 | Caml          | 0.52 | 1.04 | - | 0.8044  |
| 3375 | IPI00132388.3 | Bzw1          | 0.52 | 1.17 | - | -       |
| 3376 | IPI00473748.5 | Mtap4         | 0.52 | 0.99 | - | -       |
| 3377 | IPI00752985.1 | Gm8137;Gm8264 | 0.52 | -    | - | -       |

|      |               |                |      |      |   |         |
|------|---------------|----------------|------|------|---|---------|
| 3378 | IPI00461456.1 | Rpl23a;Gm10132 | 0.52 | -    | - | -       |
| 3379 | IPI00848364.1 | Gm3940         | 0.52 | -    | - | -       |
| 3380 | IPI00876212.1 | -              | 0.52 | -    | - | -       |
| 3381 | IPI00849847.1 | Gm3362         | 0.52 | -    | - | -       |
| 3382 | IPI00752639.1 | Gm8158;Gm8112  | 0.52 | -    | - | -       |
| 3383 | IPI00754976.2 | Gm10335        | 0.52 | 1.01 | - | -       |
| 3384 | IPI00874935.1 | Gm3174;LOC1000 | 0.52 | -    | - | -       |
| 3385 | IPI00408543.5 | Clip2          | 0.52 | -    | - | -       |
| 3386 | IPI00113521.5 | Ncs1           | 0.52 | 0.94 | - | 0.81988 |
| 3387 | IPI00128319.1 | Agap3          | 0.53 | -    | - | -       |
| 3388 | IPI00648564.1 | Mapt           | 0.53 | -    | - | -       |
| 3389 | IPI00649060.1 | Akap2          | 0.53 | -    | - | -       |
| 3390 | IPI00469280.5 | Slc30a6        | 0.53 | 0.94 | - | 0.90457 |
| 3391 | IPI00653962.1 | Rps15          | 0.53 | -    | - | -       |
| 3392 | IPI00116744.1 | B3gat3         | 0.54 | 1.62 | - | -       |
| 3393 | IPI00762081.1 | Rufy3          | 0.55 | -    | - | -       |
| 3394 | IPI00453965.2 | Rufy3          | 0.55 | -    | - | -       |
| 3395 | IPI00761269.2 | Rufy3          | 0.55 | -    | - | -       |
| 3396 | IPI00856480.1 | Nrxn2          | 0.55 | -    | - | -       |
| 3397 | IPI00918148.1 | Nrxn2          | 0.55 | 0.81 | - | -       |
| 3398 | IPI00467429.4 | Nrxn2          | 0.55 | -    | - | -       |
| 3399 | IPI00788451.1 | Podxl2         | 0.55 | 1.05 | - | -       |
| 3400 | IPI00229420.2 | Podxl2         | 0.55 | -    | - | -       |
| 3401 | IPI00111145.7 | Uprt           | 0.55 | -    | - | -       |
| 3402 | IPI00225301.1 | Hsdl1          | 0.55 | 1.17 | - | 0.47269 |
| 3403 | IPI00655113.1 | Gopc           | 0.55 | 1.38 | - | -       |
| 3404 | IPI00221745.1 | Gopc           | 0.55 | -    | - | -       |
| 3405 | IPI00112129.1 | Gatm           | 0.56 | 1.67 | - | -       |
| 3406 | IPI00881118.1 | Ciapin1        | 0.56 | 0.98 | - | -       |
| 3407 | IPI00187301.1 | Ciapin1        | 0.56 | -    | - | -       |
| 3408 | IPI00881250.1 | Ciapin1        | 0.56 | -    | - | -       |
| 3409 | IPI00113746.3 | U2af2          | 0.56 | 1.24 | - | -       |
| 3410 | IPI00172092.1 | Zdhhc3         | 0.56 | -    | - | -       |
| 3411 | IPI00133612.1 | Ttc35          | 0.56 | 1.09 | - | 0.7881  |
| 3412 | IPI00845683.1 | Nav1           | 0.56 | -    | - | -       |
| 3413 | IPI00169851.4 | Ablim1         | 0.56 | -    | - | -       |
| 3414 | IPI00874916.1 | Lrrc8b         | 0.57 | 0.83 | - | 0.54447 |
| 3415 | IPI00458354.4 | Lrrc8b         | 0.57 | -    | - | -       |
| 3416 | IPI00923108.1 |                | 0.58 | -    | - | -       |
| 3417 | IPI00111931.1 | Arfgap3        | 0.58 | 1.72 | - | -       |
| 3418 | IPI00322631.3 | Gpaa1          | 0.58 | -    | - | -       |
| 3419 | IPI00132147.1 | Mrps16         | 0.59 | 0.87 | - | -       |
| 3420 | IPI00224784.4 | Ptma           | 0.60 | -    | - | -       |
| 3421 | IPI00406841.1 | Gm12504        | 0.60 | 0.98 | - | -       |
| 3422 | IPI00848506.1 | Gm4617         | 0.60 | -    | - | -       |
| 3423 | IPI00625829.2 | Gm4617         | 0.60 | -    | - | -       |
| 3424 | IPI00857642.1 | Puf60          | 0.60 | -    | - | -       |
| 3425 | IPI00127174.4 | Puf60          | 0.60 | -    | - | -       |
| 3426 | IPI00652919.2 | Puf60          | 0.60 | 0.86 | - | -       |
| 3427 | IPI00886236.1 | Dcakd          | 0.60 | 1.05 | - | 0.85986 |
| 3428 | IPI00317794.5 | Ncl            | 0.61 | 1.20 | - | 0.47039 |
| 3429 | IPI00120457.1 | Fdps           | 0.61 | 0.87 | - | 0.64916 |

|      |               |                |      |      |   |         |
|------|---------------|----------------|------|------|---|---------|
| 3430 | IPI00454008.1 | Shmt2          | 0.61 | 1.19 | - | 0.3937  |
| 3431 | IPI00454042.2 | Fam3c          | 0.61 | 1.06 | - | 0.8044  |
| 3432 | IPI00886126.1 | Mllt4          | 0.61 | -    | - | -       |
| 3433 | IPI00377496.5 | Car8;LOC676792 | 0.62 | -    | - | -       |
| 3434 | IPI00457626.2 | Camkk2         | 0.62 | -    | - | -       |
| 3435 | IPI00404236.1 | Camkk2         | 0.62 | 1.02 | - | -       |
| 3436 | IPI00874630.1 | Camkk2         | 0.62 | -    | - | -       |
| 3437 | IPI00404152.2 | Camkk2         | 0.62 | -    | - | -       |
| 3438 | IPI00480493.3 | Camkk2         | 0.62 | 1.38 | - | -       |
| 3439 | IPI00480226.1 | Camkk2         | 0.62 | -    | - | -       |
| 3440 | IPI00462651.1 | Commd5         | 0.62 | 1.15 | - | 0.62171 |
| 3441 | IPI00919258.1 | Psmc3          | 0.62 | -    | - | -       |
| 3442 | IPI00649747.2 | Slc25a19       | 0.62 | -    | - | -       |
| 3443 | IPI00118826.1 | Slc25a19       | 0.62 | -    | - | -       |
| 3444 | IPI00170342.1 | Dner           | 0.62 | 1.05 | - | 0.93774 |
| 3445 | IPI00121627.3 | Clptm1         | 0.62 | 0.99 | - | 0.97749 |
| 3446 | IPI00881758.1 | Rps16;Gm10079  | 0.62 | 1.16 | - | 0.31297 |
| 3447 | IPI00469918.4 | Gm10079        | 0.62 | -    | - | -       |
| 3448 | IPI00850220.1 | LOC100047501   | 0.62 | 1.15 | - | -       |
| 3449 | IPI00856509.1 | Mrpl3          | 0.63 | 0.98 | - | 0.83335 |
| 3450 | IPI00648186.4 | Clint1         | 0.63 | 1.16 | - | -       |
| 3451 | IPI00473542.1 | Psmb5          | 0.63 | -    | - | -       |
| 3452 | IPI00139378.1 | Ufm1           | 0.63 | -    | - | -       |
| 3453 | IPI00880407.1 | Ufm1           | 0.63 | 1.04 | - | 0.61282 |
| 3454 | IPI00351206.5 | Pgrmc2         | 0.63 | 0.96 | - | 0.83925 |
| 3455 | IPI00649277.2 | Ephb2          | 0.64 | -    | - | -       |
| 3456 | IPI00648802.2 | Ephb2          | 0.64 | 0.91 | - | 0.85958 |
| 3457 | IPI00844710.2 | Ephb2          | 0.64 | -    | - | -       |
| 3458 | IPI00108870.2 | Ephb2          | 0.64 | -    | - | -       |
| 3459 | IPI00857594.1 | Ephb2          | 0.64 | -    | - | -       |
| 3460 | IPI00653324.2 | Fam164a        | 0.64 | 0.86 | - | 0.76888 |
| 3461 | IPI00875923.1 | Fam164a        | 0.64 | -    | - | -       |
| 3462 | IPI00222393.2 | Fam164a        | 0.64 | -    | - | -       |
| 3463 | IPI00124287.1 | Pabpc1         | 0.64 | -    | - | -       |
| 3464 | IPI00331552.4 | Pabpc1         | 0.64 | 1.14 | - | 0.49522 |
| 3465 | IPI00408036.2 | Gpsm1          | 0.64 | -    | - | -       |
| 3466 | IPI00751129.1 | Gpsm1          | 0.64 | -    | - | -       |
| 3467 | IPI00226536.2 | Gpsm1          | 0.64 | -    | - | -       |
| 3468 | IPI00405083.2 | Gpsm1          | 0.64 | 0.94 | - | 0.90308 |
| 3469 | IPI00798498.1 | Gpsm1          | 0.64 | -    | - | -       |
| 3470 | IPI00130439.1 | Camk1          | 0.64 | 1.00 | - | -       |
| 3471 | IPI00124127.1 | Sms;Gm14680    | 0.64 | -    | - | -       |
| 3472 | IPI00406424.1 | Gm13238        | 0.64 | -    | - | -       |
| 3473 | IPI00911128.1 | Cdv3           | 0.64 | -    | - | -       |
| 3474 | IPI00187275.2 | Cdv3           | 0.64 | -    | - | -       |
| 3475 | IPI00911127.1 | Cdv3           | 0.64 | -    | - | -       |
| 3476 | IPI00227808.3 | Cdv3           | 0.64 | 1.18 | - | 0.75774 |
| 3477 | IPI00379353.2 | Gm13146        | 0.64 | -    | - | -       |
| 3478 | IPI00322749.3 | Snrpd1         | 0.65 | 1.11 | - | 0.71119 |
| 3479 | IPI00459374.3 | Gm5678         | 0.65 | -    | - | -       |
| 3480 | IPI00380068.3 | LOC386400      | 0.65 | -    | - | -       |
| 3481 | IPI00119027.1 | Dvl1           | 0.65 | -    | - | -       |

|      |               |                 |      |      |   |         |
|------|---------------|-----------------|------|------|---|---------|
| 3482 | IPI00653693.1 | Dvl1            | 0.65 | -    | - | -       |
| 3483 | IPI00654021.1 | MacroD2         | 0.65 | 0.66 | - | -       |
| 3484 | IPI00122320.3 | Cryz1           | 0.65 | -    | - | -       |
| 3485 | IPI00652802.2 | Agap1           | 0.65 | 1.06 | - | 0.96735 |
| 3486 | IPI00226729.1 | Agap1           | 0.65 | -    | - | -       |
| 3487 | IPI00874318.1 | Vps11           | 0.66 | 1.12 | - | 0.53678 |
| 3488 | IPI00284925.3 | Chchd2          | 0.66 | -    | - | -       |
| 3489 | IPI00857097.1 | Scand3          | 0.66 | -    | - | -       |
| 3490 | IPI00407413.2 | Scand3          | 0.66 | -    | - | -       |
| 3491 | IPI00227586.1 | Lrfn5           | 0.66 | -    | - | -       |
| 3492 | IPI00226604.1 | Lrfn5           | 0.66 | -    | - | -       |
| 3493 | IPI00129792.1 | Kpna4           | 0.66 | 0.80 | - | 0.47269 |
| 3494 | IPI00224294.2 | Man2a2          | 0.66 | 1.47 | - | 0.65941 |
| 3495 | IPI00880679.1 | Tpm3            | 0.66 | -    | - | -       |
| 3496 | IPI00126000.1 | Fkbp3           | 0.66 | 1.36 | - | 0.38642 |
| 3497 | IPI00848872.1 | Gm3879          | 0.66 | -    | - | -       |
| 3498 | IPI00849249.1 |                 | 0.66 | -    | - | -       |
| 3499 | IPI00672455.1 | -               | 0.66 | -    | - | -       |
| 3500 | IPI00136683.1 | Acot2           | 0.67 | 1.41 | - | -       |
| 3501 | IPI00653566.1 | Acot2           | 0.67 | 1.44 | - | 0.70155 |
| 3502 | IPI00457499.5 | Gcn11           | 0.67 | 1.13 | - | -       |
| 3503 | IPI00895455.1 | Rps14           | 0.67 | 1.02 | - | -       |
| 3504 | IPI00895514.1 | Rps14           | 0.67 | -    | - | -       |
| 3505 | IPI00761566.1 | Arrb1           | 0.67 | 0.74 | - | -       |
| 3506 | IPI00515622.1 | Synrg           | 0.67 | -    | - | -       |
| 3507 | IPI00380008.1 | Synrg           | 0.67 | 1.63 | - | -       |
| 3508 | IPI00264398.3 | Gm15360         | 0.67 | 1.01 | - | 0.97987 |
| 3509 | IPI00122426.1 | Rpl19           | 0.67 | -    | - | -       |
| 3510 | IPI00648315.1 | Rpl19           | 0.67 | -    | - | -       |
| 3511 | IPI00271951.5 | Pdia4           | 0.68 | 1.02 | - | 0.90208 |
| 3512 | IPI00110729.1 | Chmp5           | 0.68 | 0.94 | - | 0.8719  |
| 3513 | IPI00856902.1 | Fkbp4           | 0.68 | -    | - | -       |
| 3514 | IPI00856205.1 | Fkbp4           | 0.68 | -    | - | -       |
| 3515 | IPI00110487.1 | 2310003C23Rik   | 0.68 | 1.44 | - | 0.66501 |
| 3516 | IPI00137314.2 | Plxna3          | 0.68 | -    | - | -       |
| 3517 | IPI00474783.4 | Acaca           | 0.69 | -    | - | -       |
| 3518 | IPI00848443.1 | Acaca           | 0.69 | 0.85 | - | 0.63407 |
| 3519 | IPI00139780.1 | Rpl23           | 0.69 | -    | - | -       |
| 3520 | IPI00943422.1 | Eif2c1          | 0.69 | 0.99 | - | -       |
| 3521 | IPI00221884.1 | Nipa1           | 0.69 | 1.16 | - | 0.35843 |
| 3522 | IPI00658539.1 | Ctsa            | 0.69 | 1.50 | - | 0.33373 |
| 3523 | IPI00137177.1 | Ctsa            | 0.69 | -    | - | -       |
| 3524 | IPI00277271.2 | BC037034        | 0.70 | -    | - | -       |
| 3525 | IPI00230044.5 | Tpm3            | 0.70 | -    | - | -       |
| 3526 | IPI00474756.1 | -               | 0.70 | 0.79 | - | -       |
| 3527 | IPI00108895.1 | Psmc4           | 0.70 | -    | - | -       |
| 3528 | IPI00331327.3 | Hars            | 0.70 | 0.94 | - | 0.82896 |
| 3529 | IPI00116991.1 | Hars            | 0.70 | -    | - | -       |
| 3530 | IPI00662501.1 |                 | 0.70 | 1.02 | - | -       |
| 3531 | IPI00677111.1 | Gm6126          | 0.70 | 1.23 | - | -       |
| 3532 | IPI00323130.3 | Tceb1;LOC10004! | 0.70 | -    | - | -       |
| 3533 | IPI00331178.2 | C85492          | 0.70 | -    | - | -       |

|      |               |                  |      |      |   |         |
|------|---------------|------------------|------|------|---|---------|
| 3534 | IPI00785452.1 | C85492           | 0.70 | 1.08 | - | 0.60086 |
| 3535 | IPI00321919.1 | Gpr56            | 0.71 | 0.80 | - | 0.6869  |
| 3536 | IPI00377299.1 | Exoc8            | 0.71 | 1.04 | - | 0.89484 |
| 3537 | IPI00137694.5 | Hddc2            | 0.71 | 1.67 | - | -       |
| 3538 | IPI00654218.3 | Rspry1           | 0.71 | -    | - | -       |
| 3539 | IPI00223590.6 | Rspry1           | 0.71 | -    | - | -       |
| 3540 | IPI00136555.1 | Yme11l           | 0.71 | 0.99 | - | 0.97719 |
| 3541 | IPI00226080.5 | Rlbp1            | 0.72 | -    | - | -       |
| 3542 | IPI00471256.2 | Prkra            | 0.72 | 0.94 | - | 0.87871 |
| 3543 | IPI00955687.1 | Usp10;Galnt2     | 0.72 | -    | - | -       |
| 3544 | IPI00420601.6 | Usp10;Galnt2     | 0.72 | -    | - | -       |
| 3545 | IPI00858314.2 | Galnt2           | 0.72 | 1.57 | - | 0.47605 |
| 3546 | IPI00551229.1 | Clcn4-2          | 0.72 | 1.11 | - | 0.54174 |
| 3547 | IPI00331410.2 | Clcn4-2          | 0.72 | -    | - | -       |
| 3548 | IPI00127237.1 | Pex14            | 0.72 | 1.21 | - | 0.5772  |
| 3549 | IPI00133024.1 | Vta1             | 0.72 | -    | - | -       |
| 3550 | IPI00408001.6 | Mdga1            | 0.73 | -    | - | -       |
| 3551 | IPI00761979.2 | Mdga1            | 0.73 | -    | - | -       |
| 3552 | IPI00855216.1 | Gnal1            | 0.73 | -    | - | -       |
| 3553 | IPI00762316.3 | Gnal1            | 0.73 | 0.77 | - | 0.63976 |
| 3554 | IPI00881493.1 | Dclk1            | 0.73 | -    | - | -       |
| 3555 | IPI00115850.2 | Idi1;LOC10004471 | 0.73 | 0.97 | - | 0.9111  |
| 3556 | IPI00466390.1 | Tuba3b;Tuba3a    | 0.73 | -    | - | -       |
| 3557 | IPI00463761.1 | Syn3             | 0.73 | -    | - | -       |
| 3558 | IPI00875940.3 | Syn3             | 0.73 | 1.18 | - | 0.50543 |
| 3559 | IPI00895273.1 | Spns1            | 0.74 | -    | - | -       |
| 3560 | IPI00895524.1 | Spns1            | 0.74 | -    | - | -       |
| 3561 | IPI00894875.1 | Spns1            | 0.74 | 1.25 | - | 0.66504 |
| 3562 | IPI00111254.8 | Spns1            | 0.74 | -    | - | -       |
| 3563 | IPI00471441.1 | Ptms             | 0.74 | -    | - | -       |
| 3564 | IPI00408734.4 | Trappc10         | 0.74 | 0.99 | - | 0.98022 |
| 3565 | IPI00919260.1 | D5Wsu178e        | 0.74 | -    | - | -       |
| 3566 | IPI00753965.4 | D5Wsu178e        | 0.74 | -    | - | -       |
| 3567 | IPI00229180.3 | D5Wsu178e        | 0.74 | -    | - | -       |
| 3568 | IPI00331514.6 | Eif5a2           | 0.74 | -    | - | -       |
| 3569 | IPI00762712.2 | Shroom2          | 0.74 | 0.77 | - | -       |
| 3570 | IPI00463074.6 | Shroom2          | 0.74 | -    | - | -       |
| 3571 | IPI00113528.1 | Tm9sf3           | 0.74 | 1.27 | - | -       |
| 3572 | IPI00311833.6 | Uba5             | 0.74 | 0.77 | - | 0.50817 |
| 3573 | IPI00881004.1 | Uba5             | 0.74 | -    | - | -       |
| 3574 | IPI00464104.3 | Tsc22d1          | 0.75 | -    | - | -       |
| 3575 | IPI00420803.4 | Tsc22d1          | 0.75 | 0.75 | - | -       |
| 3576 | IPI00458074.3 | Dnajc13          | 0.75 | -    | - | -       |
| 3577 | IPI00928532.1 | Eif3f            | 0.75 | 1.10 | - | 0.49823 |
| 3578 | IPI00856500.2 | Dctn1            | 0.75 | -    | - | -       |
| 3579 | IPI00858004.1 | Dctn1            | 0.75 | -    | - | -       |
| 3580 | IPI00881788.1 | Ipo4             | 0.75 | 1.10 | - | 0.49165 |
| 3581 | IPI00165857.5 | Pcdh10           | 0.75 | -    | - | -       |
| 3582 | IPI00761938.2 | Cntn2            | 0.75 | -    | - | -       |
| 3583 | IPI00785288.1 | Cpne7            | 0.75 | 0.92 | - | -       |
| 3584 | IPI00420726.3 | Rps9             | 0.75 | 1.17 | - | 0.5062  |
| 3585 | IPI00556853.1 | Tmed10           | 0.75 | -    | - | -       |

|      |               |               |      |      |   |         |
|------|---------------|---------------|------|------|---|---------|
| 3586 | IPI00856794.1 | Dync1i1       | 0.75 | -    | - | -       |
| 3587 | IPI00229895.1 | Disp2         | 0.75 | 1.40 | - | 0.68765 |
| 3588 | IPI00135186.1 | Calu          | 0.75 | -    | - | -       |
| 3589 | IPI00308333.3 | Klraq1        | 0.76 | -    | - | -       |
| 3590 | IPI00845604.2 | Klraq1        | 0.76 | 1.18 | - | 0.59034 |
| 3591 | IPI00469253.6 | Rftn1         | 0.76 | 1.42 | - | -       |
| 3592 | IPI00464115.1 | Tnpo3         | 0.76 | 1.03 | - | 0.9364  |
| 3593 | IPI00464114.1 | Tnpo3         | 0.76 | -    | - | -       |
| 3594 | IPI00608095.1 | Scg2          | 0.77 | -    | - | -       |
| 3595 | IPI00222107.6 | Frmd4a        | 0.77 | -    | - | -       |
| 3596 | IPI00465706.2 | Frmd4a        | 0.77 | -    | - | -       |
| 3597 | IPI00453819.2 | Lars          | 0.77 | 1.49 | - | 0.37683 |
| 3598 | IPI00848632.1 | Pcdh10        | 0.77 | -    | - | -       |
| 3599 | IPI00850705.1 | Pcdh10        | 0.77 | -    | - | -       |
| 3600 | IPI00849380.1 | Pcdh10        | 0.77 | -    | - | -       |
| 3601 | IPI00110827.1 | Acta1         | 0.77 | -    | - | -       |
| 3602 | IPI00761959.1 | Sco1          | 0.77 | 0.87 | - | 0.47039 |
| 3603 | IPI00515530.5 | Sco1          | 0.77 | -    | - | -       |
| 3604 | IPI00131084.3 | Dync1i1       | 0.78 | -    | - | -       |
| 3605 | IPI00113239.1 | Tmem55a       | 0.78 | 1.60 | - | 0.62108 |
| 3606 | IPI00875102.1 | Sh2b1         | 0.78 | -    | - | -       |
| 3607 | IPI00889278.1 | Sh2b1         | 0.78 | -    | - | -       |
| 3608 | IPI00315068.1 | Sh2b1         | 0.78 | -    | - | -       |
| 3609 | IPI00284016.4 | Sh2b1         | 0.78 | 1.04 | - | -       |
| 3610 | IPI00283476.7 | Sh2b1         | 0.78 | -    | - | -       |
| 3611 | IPI00116718.1 | Gm10145       | 0.78 | -    | - | -       |
| 3612 | IPI00187430.3 | Rab2b         | 0.79 | 0.97 | - | -       |
| 3613 | IPI00120318.7 | Grik3         | 0.79 | 1.06 | - | 0.96735 |
| 3614 | IPI00125348.2 | Mprrip        | 0.79 | -    | - | -       |
| 3615 | IPI00399575.3 | Mprrip        | 0.79 | 0.95 | - | -       |
| 3616 | IPI00720036.1 | Mprrip        | 0.79 | -    | - | -       |
| 3617 | IPI00720060.1 | Mprrip        | 0.79 | -    | - | -       |
| 3618 | IPI00874680.1 | Nln           | 0.79 | 1.06 | - | 0.83925 |
| 3619 | IPI00742383.1 | LOC100048062  | 0.79 | -    | - | -       |
| 3620 | IPI00230623.8 | Rpl32         | 0.80 | 1.08 | - | 0.76814 |
| 3621 | IPI00319273.1 | Rwdd1         | 0.80 | -    | - | -       |
| 3622 | IPI00132659.1 | Rwdd1         | 0.80 | -    | - | -       |
| 3623 | IPI00311329.1 | Kpna1         | 0.80 | -    | - | -       |
| 3624 | IPI00127351.2 | Fam173a       | 0.80 | -    | - | -       |
| 3625 | IPI00469351.3 | Gm4130        | 0.80 | 1.24 | - | 0.3547  |
| 3626 | IPI00755729.1 | LOC100047113  | 0.80 | -    | - | -       |
| 3627 | IPI00310247.7 | Ank           | 0.80 | 1.25 | - | 0.37683 |
| 3628 | IPI00751050.2 | Gm6030        | 0.80 | -    | - | -       |
| 3629 | IPI00462507.1 | Cndp2         | 0.81 | 0.96 | - | -       |
| 3630 | IPI00314513.1 | Tmem205       | 0.81 | 1.15 | - | -       |
| 3631 | IPI00221739.1 | Thns1         | 0.81 | 0.87 | - | 0.49522 |
| 3632 | IPI00137194.1 | Slc16a1       | 0.81 | 0.81 | - | 0.47039 |
| 3633 | IPI00110208.1 | 2310011J03Rik | 0.81 | -    | - | -       |
| 3634 | IPI00131086.1 | Dync1i2       | 0.81 | -    | - | -       |
| 3635 | IPI00775798.1 | Dync1i2       | 0.81 | -    | - | -       |
| 3636 | IPI00153743.1 | Sfrs7         | 0.81 | -    | - | -       |
| 3637 | IPI00129323.1 | Sfrs3         | 0.81 | -    | - | -       |

|      |               |                 |      |      |   |         |
|------|---------------|-----------------|------|------|---|---------|
| 3638 | IPI00346575.3 | Gm7083          | 0.81 | -    | - | -       |
| 3639 | IPI00474970.2 | LOC100047744;G  | 0.81 | -    | - | -       |
| 3640 | IPI00474169.2 | Sfrs7           | 0.81 | -    | - | -       |
| 3641 | IPI00474158.4 | Sfrs7           | 0.81 | -    | - | -       |
| 3642 | IPI00649438.1 | Gm12355         | 0.81 | 1.07 | - | 0.44201 |
| 3643 | IPI00222763.1 | Sfrs7           | 0.81 | 0.91 | - | 0.73026 |
| 3644 | IPI00221826.1 | Sfrs3           | 0.81 | 1.03 | - | -       |
| 3645 | IPI00131888.1 | Mcts2           | 0.81 | -    | - | -       |
| 3646 | IPI00128880.3 | Ipo4            | 0.82 | -    | - | -       |
| 3647 | IPI00132474.3 | Itgb1           | 0.82 | 1.13 | - | 0.49522 |
| 3648 | IPI00955720.1 | Kctd12          | 0.82 | 1.07 | - | -       |
| 3649 | IPI00845611.1 | Tcp1            | 0.82 | -    | - | -       |
| 3650 | IPI00137792.1 | Smpd1           | 0.83 | 0.96 | - | 0.84581 |
| 3651 | IPI00849652.6 | LOC100045527;Rl | 0.83 | -    | - | -       |
| 3652 | IPI00626233.3 | Gm10164         | 0.83 | -    | - | -       |
| 3653 | IPI00468667.4 | Gm10268         | 0.83 | 0.96 | - | 0.9326  |
| 3654 | IPI00761421.2 | Gm10362         | 0.83 | -    | - | -       |
| 3655 | IPI00453768.4 | Rpl17           | 0.83 | -    | - | -       |
| 3656 | IPI00114332.5 | Rps6ka1         | 0.83 | -    | - | -       |
| 3657 | IPI00648998.3 | Rps6ka1         | 0.83 | 0.81 | - | -       |
| 3658 | IPI00130766.1 | Prrt1           | 0.83 | 2.40 | - | -       |
| 3659 | IPI00938514.1 | Pik3r2          | 0.83 | -    | - | -       |
| 3660 | IPI00117159.1 | Pik3r2          | 0.83 | -    | - | -       |
| 3661 | IPI00405397.2 | Ube4a           | 0.83 | -    | - | -       |
| 3662 | IPI00467045.3 | Ube4a           | 0.83 | 1.14 | - | -       |
| 3663 | IPI00126548.2 | Agpat1          | 0.83 | 0.94 | - | 0.83082 |
| 3664 | IPI00421012.1 | Fam134a         | 0.83 | -    | - | -       |
| 3665 | IPI00607951.1 | Fam134a         | 0.83 | -    | - | -       |
| 3666 | IPI00607924.1 | Fam134a         | 0.83 | 0.98 | - | -       |
| 3667 | IPI00755990.1 | -               | 0.83 | -    | - | -       |
| 3668 | IPI00153241.1 | Vps37c          | 0.83 | -    | - | -       |
| 3669 | IPI00128134.2 | Cyth2           | 0.84 | -    | - | -       |
| 3670 | IPI00227247.1 | Cyth2           | 0.84 | 0.90 | - | 0.78265 |
| 3671 | IPI00856998.1 | Cyth2           | 0.84 | -    | - | -       |
| 3672 | IPI00856636.1 | Cyth2           | 0.84 | -    | - | -       |
| 3673 | IPI00856914.3 | Cyth2           | 0.84 | -    | - | -       |
| 3674 | IPI00387504.1 | Mpdu1           | 0.84 | 1.14 | - | 0.45837 |
| 3675 | IPI00758361.1 | LOC100048170    | 0.84 | -    | - | -       |
| 3676 | IPI00331563.2 | Mpdu1           | 0.84 | -    | - | -       |
| 3677 | IPI00553379.3 | Mpdu1           | 0.84 | -    | - | -       |
| 3678 | IPI00553623.1 | Mpdu1           | 0.84 | -    | - | -       |
| 3679 | IPI00129632.1 | Pcdhga9;Pcdhga1 | 0.84 | -    | - | -       |
| 3680 | IPI00129680.1 | Pcdhga12;Pcdhga | 0.84 | -    | - | -       |
| 3681 | IPI00129686.1 | Pcdhga11;Pcdhga | 0.84 | -    | - | -       |
| 3682 | IPI00129675.2 | Pcdhga4         | 0.84 | -    | - | -       |
| 3683 | IPI00918586.1 | Ccdc6           | 0.84 | -    | - | -       |
| 3684 | IPI00918344.1 | Ccdc6           | 0.84 | -    | - | -       |
| 3685 | IPI00381495.5 | Ccdc6           | 0.84 | -    | - | -       |
| 3686 | IPI00473320.2 | Actb            | 0.84 | -    | - | -       |
| 3687 | IPI00776346.3 | Kalrn           | 0.84 | -    | - | -       |
| 3688 | IPI00133985.1 | Ruvbl1          | 0.84 | -    | - | -       |
| 3689 | IPI00856593.1 | Ruvbl1          | 0.84 | 0.94 | - | 0.90811 |

|      |               |                   |      |       |   |         |
|------|---------------|-------------------|------|-------|---|---------|
| 3690 | IPI00407835.2 | Ubap2l            | 0.84 | -     | - | -       |
| 3691 | IPI00761937.1 | Ubap2l            | 0.84 | 0.98  | - | 0.97289 |
| 3692 | IPI00272033.3 | Hist2h2ab;Hist2h  | 0.84 | -     | - | -       |
| 3693 | IPI00330000.4 | Hist2h2aa1;Hist2l | 0.84 | 0.99  | - | 0.9617  |
| 3694 | IPI00122568.3 | Arhgdib           | 0.84 | 0.96  | - | 0.88143 |
| 3695 | IPI00755623.3 | -                 | 0.85 | -     | - | -       |
| 3696 | IPI00853914.1 | LOC100045191      | 0.85 | -     | - | -       |
| 3697 | IPI00890022.2 | Hnrnpa2b1         | 0.85 | -     | - | -       |
| 3698 | IPI00828488.1 | Hnrnpa2b1         | 0.85 | -     | - | -       |
| 3699 | IPI00622847.2 | Hnrnpa2b1         | 0.85 | 1.02  | - | 0.90591 |
| 3700 | IPI00405058.6 | Hnrnpa2b1         | 0.85 | -     | - | -       |
| 3701 | IPI00380894.4 | Shisa6            | 0.85 | 50.19 | - | -       |
| 3702 | IPI00874655.1 | Cox15             | 0.85 | -     | - | -       |
| 3703 | IPI00222203.1 | Cox15             | 0.85 | -     | - | -       |
| 3704 | IPI00267596.1 | Cox15             | 0.85 | 1.13  | - | 0.79606 |
| 3705 | IPI00408218.1 | Zyx               | 0.85 | 0.61  | - | -       |
| 3706 | IPI00387422.3 | Zyx               | 0.85 | -     | - | -       |
| 3707 | IPI00228360.3 | Zyx               | 0.85 | -     | - | -       |
| 3708 | IPI00467599.1 | 9-Sep             | 0.85 | -     | - | -       |
| 3709 | IPI00930841.1 | Megf8             | 0.85 | 0.87  | - | -       |
| 3710 | IPI00320687.2 | Adrbk1            | 0.85 | -     | - | -       |
| 3711 | IPI00469231.1 | Adrbk1            | 0.85 | 0.87  | - | -       |
| 3712 | IPI00114593.1 | Actc1             | 0.85 | -     | - | -       |
| 3713 | IPI00662007.3 | Exoc6b            | 0.85 | 1.03  | - | 0.88143 |
| 3714 | IPI00109354.2 | Sars2             | 0.86 | -     | - | -       |
| 3715 | IPI00222180.8 | Vars2             | 0.86 | 1.04  | - | 0.93586 |
| 3716 | IPI00654091.2 | Acsf3             | 0.86 | -     | - | -       |
| 3717 | IPI00626994.3 | Ipo5              | 0.86 | 0.80  | - | 0.38642 |
| 3718 | IPI00409936.1 | Ipo5              | 0.86 | -     | - | -       |
| 3719 | IPI00875233.1 | Ctnnd2            | 0.86 | -     | - | -       |
| 3720 | IPI00875350.1 | Ctnnd2            | 0.86 | -     | - | -       |
| 3721 | IPI00856823.1 | Pcyox1            | 0.87 | -     | - | -       |
| 3722 | IPI00330857.5 | Sec63             | 0.87 | 1.15  | - | 0.49522 |
| 3723 | IPI00831446.1 | Trim46            | 0.87 | 1.44  | - | 0.76888 |
| 3724 | IPI00378619.1 | Trim46            | 0.87 | -     | - | -       |
| 3725 | IPI00876204.1 | Ctsa              | 0.87 | -     | - | -       |
| 3726 | IPI00751338.1 | Ctsa              | 0.87 | -     | - | -       |
| 3727 | IPI00135598.1 | Kcnd1             | 0.87 | -     | - | -       |
| 3728 | IPI00885547.1 | Tmed2             | 0.87 | 1.26  | - | -       |
| 3729 | IPI00127983.1 | Tmed2;Gm10698     | 0.87 | -     | - | -       |
| 3730 | IPI00858230.1 | Comt1             | 0.87 | -     | - | -       |
| 3731 | IPI00132076.1 | Comt1             | 0.87 | -     | - | -       |
| 3732 | IPI00759876.2 | Comt1             | 0.87 | 1.02  | - | 0.95332 |
| 3733 | IPI00622375.2 | Ubap2l            | 0.87 | 1.18  | - | -       |
| 3734 | IPI00761299.1 | Ubap2l            | 0.87 | -     | - | -       |
| 3735 | IPI00889845.1 | Ubap2l            | 0.87 | -     | - | -       |
| 3736 | IPI00889927.2 | Ubap2l            | 0.87 | -     | - | -       |
| 3737 | IPI00761172.1 | Ubap2l            | 0.87 | -     | - | -       |
| 3738 | IPI00108883.3 | Fam108b           | 0.88 | 0.98  | - | 0.94699 |
| 3739 | IPI00221411.1 | Ppp2r2c           | 0.88 | 0.75  | - | -       |
| 3740 | IPI00553826.3 | Rpl30             | 0.88 | -     | - | -       |
| 3741 | IPI00853800.1 | LOC100048165      | 0.88 | -     | - | -       |



|      |                |                  |      |      |   |         |
|------|----------------|------------------|------|------|---|---------|
| 3742 | IPI00760095.2  | Xpo7             | 0.88 | 0.94 | - | 0.76194 |
| 3743 | IPI00849118.1  | LOC100048165     | 0.88 | -    | - | -       |
| 3744 | IPI00110049.5  | Xpo7             | 0.88 | -    | - | -       |
| 3745 | IPI00850842.1  | LOC100048165     | 0.88 | -    | - | -       |
| 3746 | IPI00330169.10 | A830010M20Rik    | 0.88 | 1.88 | - | -       |
| 3747 | IPI00221694.1  | Bola2            | 0.88 | -    | - | -       |
| 3748 | IPI00656269.1  | Ywhaq            | 0.88 | 0.94 | - | 0.77883 |
| 3749 | IPI00408378.4  | Ywhaq            | 0.88 | -    | - | -       |
| 3750 | IPI00170032.1  | Rab15            | 0.88 | -    | - | -       |
| 3751 | IPI00622236.4  | Rab15            | 0.88 | -    | - | -       |
| 3752 | IPI00884469.1  | Rab15            | 0.88 | -    | - | -       |
| 3753 | IPI00131224.1  | Tceb2            | 0.88 | 0.94 | - | 0.86978 |
| 3754 | IPI00648755.1  | Akap2;Palm2;Palr | 0.88 | 0.52 | - | 0.51088 |
| 3755 | IPI00115097.1  | Copb2            | 0.88 | 1.34 | - | 0.31297 |
| 3756 | IPI00457799.1  | Rufy3            | 0.88 | -    | - | -       |
| 3757 | IPI00109791.3  | Cygb             | 0.88 | 0.74 | - | 0.3547  |
| 3758 | IPI00753560.1  | Gpsm1            | 0.89 | -    | - | -       |
| 3759 | IPI00468396.3  | Rasa3            | 0.89 | -    | - | -       |
| 3760 | IPI00816935.4  | Rasa3            | 0.89 | 0.98 | - | 0.94207 |
| 3761 | IPI00229543.3  | Hist1h2af        | 0.89 | -    | - | -       |
| 3762 | IPI00229542.1  | Hist1h2aa        | 0.89 | -    | - | -       |
| 3763 | IPI00221463.3  | Hist3h2a         | 0.89 | 1.15 | - | -       |
| 3764 | IPI00265761.6  | Hist1h2an;Hist1h | 0.89 | -    | - | -       |
| 3765 | IPI00229545.3  | Hist1h2ak        | 0.89 | -    | - | -       |
| 3766 | IPI00229544.3  | Hist1h2ah        | 0.89 | -    | - | -       |
| 3767 | IPI00153400.2  | H2afj            | 0.89 | -    | - | -       |
| 3768 | IPI00461800.1  | Gm5469           | 0.89 | -    | - | -       |
| 3769 | IPI00750428.2  | Gm11847          | 0.89 | -    | - | -       |
| 3770 | IPI00757273.2  | LOC630401        | 0.89 | -    | - | -       |
| 3771 | IPI00670681.1  | Gm5469           | 0.89 | -    | - | -       |
| 3772 | IPI00659723.1  | LOC630401        | 0.89 | -    | - | -       |
| 3773 | IPI00459722.2  | Hnrnpa3          | 0.89 | -    | - | -       |
| 3774 | IPI00678360.3  | -                | 0.89 | -    | - | -       |
| 3775 | IPI00466185.4  | -                | 0.89 | -    | - | -       |
| 3776 | IPI00667787.1  | Gm11847          | 0.89 | -    | - | -       |
| 3777 | IPI00670004.1  | Gm6793           | 0.89 | -    | - | -       |
| 3778 | IPI00749630.1  | Gm9242           | 0.89 | -    | - | -       |
| 3779 | IPI00849731.1  | -                | 0.89 | -    | - | -       |
| 3780 | IPI00269662.1  | Hnrnpa3          | 0.89 | 1.33 | - | 0.39089 |
| 3781 | IPI00663550.1  | LOC630401        | 0.89 | -    | - | -       |
| 3782 | IPI00269661.1  | Hnrnpa3          | 0.89 | -    | - | -       |
| 3783 | IPI00849556.1  | Gm5469           | 0.89 | -    | - | -       |
| 3784 | IPI00750059.2  | Gm9242           | 0.89 | -    | - | -       |
| 3785 | IPI00677689.3  | Gm11847          | 0.89 | -    | - | -       |
| 3786 | IPI00752179.2  | Gm9242           | 0.89 | -    | - | -       |
| 3787 | IPI00674712.1  | Gm6793           | 0.89 | -    | - | -       |
| 3788 | IPI00170213.1  | Abhd11           | 0.89 | 1.11 | - | -       |
| 3789 | IPI00162942.1  | Mrpl37           | 0.89 | 1.22 | - | 0.47039 |
| 3790 | IPI00895319.1  | 2810422J05Rik    | 0.89 | -    | - | -       |
| 3791 | IPI00118676.3  | Eif4a1           | 0.89 | 1.18 | - | 0.31297 |
| 3792 | IPI00230422.6  | Bcap31           | 0.89 | -    | - | -       |
| 3793 | IPI00828225.1  | Bcap31           | 0.89 | 0.88 | - | 0.78569 |

|      |               |                 |      |      |   |         |
|------|---------------|-----------------|------|------|---|---------|
| 3794 | IPI00331631.1 | LOC100045432;Si | 0.90 | 1.11 | - | 0.75774 |
| 3795 | IPI00108041.1 | Stim1           | 0.90 | -    | - | -       |
| 3796 | IPI00620701.2 | Rabggta         | 0.90 | 1.33 | - | -       |
| 3797 | IPI00474751.1 | Rabggta         | 0.90 | -    | - | -       |
| 3798 | IPI00271905.2 | Rabggta         | 0.90 | -    | - | -       |
| 3799 | IPI00849492.1 | LOC100044742    | 0.90 | -    | - | -       |
| 3800 | IPI00480406.1 | Actc1           | 0.90 | -    | - | -       |
| 3801 | IPI00225288.3 | Ccdc90b         | 0.90 | -    | - | -       |
| 3802 | IPI00153369.1 | C630004H02Rik   | 0.90 | -    | - | -       |
| 3803 | IPI00607902.1 | C630004H02Rik   | 0.90 | 1.31 | - | -       |
| 3804 | IPI00751759.1 | Ptbp2           | 0.90 | 1.18 | - | 0.76538 |
| 3805 | IPI00136002.1 | Ptbp2           | 0.90 | -    | - | -       |
| 3806 | IPI00123712.1 | Timm23          | 0.90 | -    | - | -       |
| 3807 | IPI00849271.1 | Gm10273;Gm102   | 0.90 | 1.09 | - | 0.78252 |
| 3808 | IPI00230482.2 | Tsc2            | 0.90 | -    | - | -       |
| 3809 | IPI00468568.3 | Tsc2            | 0.90 | -    | - | -       |
| 3810 | IPI00133444.1 | Aktip           | 0.90 | -    | - | -       |
| 3811 | IPI00938437.1 | Akr7a5          | 0.90 | 0.96 | - | 0.75458 |
| 3812 | IPI00331490.5 | Akr7a5          | 0.90 | -    | - | -       |
| 3813 | IPI00126796.3 | Slc27a4         | 0.90 | 1.18 | - | 0.35843 |
| 3814 | IPI00121736.1 | Pdcd6           | 0.91 | 0.88 | - | -       |
| 3815 | IPI00620969.2 | Tsc2            | 0.91 | -    | - | -       |
| 3816 | IPI00230479.3 | Tsc2            | 0.91 | -    | - | -       |
| 3817 | IPI00875520.1 | Tsc2            | 0.91 | -    | - | -       |
| 3818 | IPI00230481.3 | Tsc2            | 0.91 | -    | - | -       |
| 3819 | IPI00230480.1 | Tsc2            | 0.91 | 0.86 | - | 0.45615 |
| 3820 | IPI00473408.1 | Ppp2r5d         | 0.91 | -    | - | -       |
| 3821 | IPI00229893.1 | Mark4           | 0.91 | 0.86 | - | -       |
| 3822 | IPI00856994.1 | Dguok           | 0.92 | 1.26 | - | -       |
| 3823 | IPI00224955.2 | Dguok           | 0.92 | 0.70 | - | -       |
| 3824 | IPI00622704.3 | 2310035C23Rik   | 0.92 | 1.03 | - | 0.96546 |
| 3825 | IPI00228693.4 | 2310035C23Rik   | 0.92 | -    | - | -       |
| 3826 | IPI00466258.2 | Sh3kbp1         | 0.92 | -    | - | -       |
| 3827 | IPI00312101.1 | Sh3kbp1         | 0.92 | 0.46 | - | -       |
| 3828 | IPI00406812.2 | Sh3kbp1         | 0.92 | -    | - | -       |
| 3829 | IPI00453996.1 | Myh14           | 0.92 | -    | - | -       |
| 3830 | IPI00900442.1 | Myh14           | 0.92 | -    | - | -       |
| 3831 | IPI00608077.3 | Myh14           | 0.92 | 0.87 | - | 0.71877 |
| 3832 | IPI00751207.1 | Ctnnd1          | 0.92 | -    | - | -       |
| 3833 | IPI00676225.2 | Ctnnd1          | 0.92 | -    | - | -       |
| 3834 | IPI00754980.1 | Ctnnd1          | 0.92 | -    | - | -       |
| 3835 | IPI00658280.1 | Ctnnd1          | 0.92 | -    | - | -       |
| 3836 | IPI00132218.3 | Ostc            | 0.92 | 1.09 | - | 0.6685  |
| 3837 | IPI00885539.1 | Actl6b          | 0.92 | -    | - | -       |
| 3838 | IPI00831560.1 | Actl6b          | 0.92 | -    | - | -       |
| 3839 | IPI00117981.1 | Actl6b          | 0.92 | -    | - | -       |
| 3840 | IPI00109253.1 | 2900064A13Rik   | 0.93 | 1.12 | - | 0.59994 |
| 3841 | IPI00652882.2 | 1110014N23Rik   | 0.93 | 1.00 | - | 1       |
| 3842 | IPI00138892.2 | 2810422J05Rik;G | 0.93 | -    | - | -       |
| 3843 | IPI00758106.1 | Gm7808          | 0.93 | -    | - | -       |
| 3844 | IPI00849074.1 | Gm3511;LOC100   | 0.93 | -    | - | -       |
| 3845 | IPI00137736.1 | Rps28;Gm10443   | 0.93 | -    | - | -       |

|      |                        |                |      |      |   |         |
|------|------------------------|----------------|------|------|---|---------|
| 3846 | IPI00719947.2          | Gm16417        | 0.93 | -    | - | -       |
| 3847 | IPI00458881.2          | Gm10161;LOC100 | 0.93 | 1.07 | - | -       |
| 3848 | IPI00323683.2          | Efnb2          | 0.93 | -    | - | -       |
| 3849 | IPI00762720.1          | Efnb2          | 0.93 | 0.68 | - | -       |
| 3850 | IPI00122399.1          | Glg1           | 0.93 | 1.07 | - | 0.74518 |
| 3851 | IPI00331579.1          | Syngr3         | 0.93 | 1.12 | - | 0.61079 |
| 3852 | IPI00458002.1          | Atxn2l         | 0.94 | -    | - | -       |
| 3853 | IPI00458001.1          | Atxn2l         | 0.94 | 1.01 | - | 0.98022 |
| 3854 | IPI00169500.3          | Atxn2l         | 0.94 | -    | - | -       |
| 3855 | IPI00267855.4          | Gripap1        | 0.94 | -    | - | -       |
| 3856 | IPI00127560.1          | Ttr            | 0.94 | -    | - | -       |
| 3857 | IPI00751569.3          | Dnajc5         | 0.94 | -    | - | -       |
| 3858 | IPI00848685.1          | LOC100048021   | 0.94 | 1.02 | - | -       |
| 3859 | IPI00230191.5          | Gna12          | 0.94 | -    | - | -       |
| 3860 | IPI00352788.1          | Fam171a1       | 0.94 | -    | - | -       |
| 3861 | IPI00755730.3          | Fam171a1       | 0.94 | -    | - | -       |
| 3862 | IPI00473258.3          | Fam171a1       | 0.94 | 1.03 | - | -       |
| 3863 | IPI00828495.3          | Rab9           | 0.94 | 1.01 | - | 0.98677 |
| 3864 | IPI00127820.1          | Rab9           | 0.94 | -    | - | -       |
| 3865 | IPI00108844.1          | M6pr           | 0.95 | 1.27 | - | 0.35843 |
| 3866 | IPI00130045.1          | Plcb1          | 0.95 | -    | - | -       |
| 3867 | IPI00929797.1          | Eif4a1         | 0.95 | -    | - | -       |
| 3868 | IPI00225267.6          | 2310022B05Rik  | 0.95 | 0.89 | - | 0.83925 |
| 3869 | IPI00110885.2          | Cyb5r3         | 0.95 | -    | - | -       |
| 3870 | IPI00649604.1          | Capzb          | 0.95 | -    | - | -       |
| 3871 | IPI00776265.1          | Capzb          | 0.95 | -    | - | -       |
| 3872 | IPI00227186.4          | Adhfe1         | 0.96 | -    | - | -       |
| 3873 | IPI00608106.1          | Numb1          | 0.96 | 0.63 | - | -       |
| 3874 | IPI00187271.4          | Rragd          | 0.96 | -    | - | -       |
| 3875 | IPI00649297.1          | Rragd          | 0.96 | -    | - | -       |
| 3876 | IPI00648747.1          | Rragd          | 0.96 | -    | - | -       |
| 3877 | IPI00468702.1          | Rragc          | 0.96 | 0.90 | - | 0.70019 |
| 3878 | IPI00221814.4          | 6530401N04Rik  | 0.96 | -    | - | -       |
| 3879 | IPI00798442.1          | 6530401N04Rik  | 0.96 | -    | - | -       |
| 3880 | IPI00115065.1          | Serpine2       | 0.96 | 0.95 | - | 0.86978 |
| 3881 | IPI00856490.1          | Psmd8          | 0.97 | 1.00 | - | 0.99153 |
| 3882 | IPI00831568.1          | L1cam          | 0.97 | 0.94 | - | -       |
| 3883 | IPI00153862.2          | Sult4a1        | 0.97 | -    | - | -       |
| 3884 | IPI00228515.1          | Sult4a1        | 0.97 | 0.96 | - | 0.76538 |
| 3885 | IPI00387494.1          | Hspa2          | 0.97 | 1.01 | - | 0.91929 |
| 3886 | IPI00750677.1          | Fam125b        | 0.97 | -    | - | -       |
| 3887 | IPI00469426.6          | Ptprj          | 0.97 | 0.76 | - | 0.49522 |
| 3888 | IPI00406609.2          | Ptprj          | 0.97 | -    | - | -       |
| 3889 | IPI00229030.1          | Nos1           | 0.97 | -    | - | -       |
| 3890 | IPI00129191.1          | Nos1           | 0.97 | -    | - | -       |
| 3891 | IPI00229026.1          | Nos1           | 0.97 | 1.03 | - | 0.94277 |
| 3892 | IPI00775775.1          | Gripap1        | 0.97 | -    | - | -       |
| 3893 | IPI00775865.1          | Gripap1        | 0.97 | -    | - | -       |
| 3894 | contaminant_GR78_MESAU |                | 0.97 | -    | - | -       |
| 3895 | IPI00831240.1          | Pdpk1          | 0.98 | -    | - | -       |
| 3896 | IPI00402981.2          | Rps24          | 0.98 | -    | - | -       |
| 3897 | IPI00753456.1          | Rps24          | 0.98 | -    | - | -       |

|      |                         |                 |      |      |   |         |
|------|-------------------------|-----------------|------|------|---|---------|
| 3898 | IPI00465568.5           | Rps24;LOC67711: | 0.98 | 1.12 | - | 0.3878  |
| 3899 | IPI00469332.2           | Nedd4l          | 0.98 | 0.79 | - | -       |
| 3900 | IPI00649115.1           | Nedd4l          | 0.98 | -    | - | -       |
| 3901 | IPI00125931.1           | Cstb            | 0.98 | -    | - | -       |
| 3902 | IPI00153201.1           | Gga1            | 0.98 | -    | - | -       |
| 3903 | IPI00319131.4           | Pex19           | 0.98 | 0.96 | - | -       |
| 3904 | IPI00875553.1           | Dip2c           | 0.98 | 0.79 | - | 0.38315 |
| 3905 | IPI00853927.1           | LOC100044338    | 0.98 | -    | - | -       |
| 3906 | IPI00111556.1           | Ppp2cb          | 0.98 | -    | - | -       |
| 3907 | contaminant_UBIQUITIN08 |                 | 0.98 | -    | - | -       |
| 3908 | IPI00923037.2           | Ubb;Rps27a;Ubc  | 0.98 | -    | - | -       |
| 3909 | IPI00923013.1           | Ubb;Rps27a;Ubc  | 0.98 | -    | - | -       |
| 3910 | IPI00755916.3           | Ubb;Rps27a;Ubc  | 0.98 | -    | - | -       |
| 3911 | IPI00918763.1           | 2810422J05Rik   | 0.98 | -    | - | -       |
| 3912 | IPI00139518.3           | Ubb;Rps27a;Ubc  | 0.98 | 0.93 | - | 0.80952 |
| 3913 | IPI00923082.1           | Gm1821          | 0.98 | -    | - | -       |
| 3914 | IPI00750889.3           | Ubb;Rps27a;Ubc; | 0.98 | -    | - | -       |
| 3915 | IPI00407540.1           | Ube2i           | 0.98 | 2.54 | - | 0.78569 |
| 3916 | IPI00850259.1           | Gm14176         | 0.98 | -    | - | -       |
| 3917 | IPI00119227.1           | LOC100044900;U  | 0.98 | -    | - | -       |
| 3918 | IPI00475301.2           | LOC100045388    | 0.98 | -    | - | -       |
| 3919 | IPI00808443.2           | AU042671        | 0.99 | -    | - | -       |
| 3920 | IPI00342766.9           | Hp1bp3          | 0.99 | -    | - | -       |
| 3921 | IPI00896020.1           | Hp1bp3          | 0.99 | -    | - | -       |
| 3922 | IPI00761756.1           | Ube3a           | 0.99 | -    | - | -       |
| 3923 | IPI00115595.1           | Ube3a           | 0.99 | -    | - | -       |
| 3924 | IPI00121758.1           | Tardbp          | 0.99 | 1.08 | - | 0.81614 |
| 3925 | IPI00421253.1           | Ganab           | 0.99 | -    | - | -       |
| 3926 | IPI00126131.3           | Extl3           | 0.99 | -    | - | -       |
| 3927 | IPI00515195.2           | Eif4g1          | 0.99 | 1.09 | - | 0.55514 |
| 3928 | IPI00405840.4           | Sema6a          | 0.99 | -    | - | -       |
| 3929 | IPI00474378.4           | Sema6a          | 0.99 | -    | - | -       |
| 3930 | IPI00270823.2           | Sema6a          | 0.99 | -    | - | -       |
| 3931 | IPI00480518.1           | Sema6a          | 0.99 | -    | - | -       |
| 3932 | IPI00775844.1           | Arpc2           | 0.99 | 1.05 | - | -       |
| 3933 | IPI00119136.1           | Fam158a         | 1.00 | 1.21 | - | -       |
| 3934 | IPI00118875.5           | Eef1d           | 1.00 | -    | - | -       |
| 3935 | IPI00831202.2           | Eef1d           | 1.00 | -    | - | -       |
| 3936 | IPI00928390.1           | Eef1d           | 1.00 | -    | - | -       |
| 3937 | IPI00515654.2           | Eef1d           | 1.00 | -    | - | -       |
| 3938 | IPI00857292.1           | Nucb1           | 1.00 | -    | - | -       |
| 3939 | IPI00331413.1           | Itga6           | 1.00 | 2.01 | - | 0.77322 |
| 3940 | IPI00130992.1           | Capns1          | 1.00 | -    | - | -       |
| 3941 | IPI00620873.3           | Itga6           | 1.00 | -    | - | -       |
| 3942 | IPI00136310.1           | Mrpl23;Gm13671  | 1.00 | 1.34 | - | 0.45615 |
| 3943 | IPI00831167.1           | Rab9            | 1.00 | -    | - | -       |
| 3944 | IPI00857233.1           | Gmfb            | 1.01 | 0.79 | - | -       |
| 3945 | IPI00165849.3           | Isoc1           | 1.01 | 1.02 | - | 0.91639 |
| 3946 | IPI00750595.2           | Myl9            | 1.01 | -    | - | -       |
| 3947 | IPI00133193.3           | Gadd45gip1      | 1.01 | 3.54 | - | -       |
| 3948 | IPI00648670.1           | 9-Sep           | 1.01 | -    | - | -       |
| 3949 | IPI00830290.1           | Ptk2b           | 1.01 | 0.77 | - | -       |

|      |                         |              |      |      |   |         |
|------|-------------------------|--------------|------|------|---|---------|
| 3950 | IPI00896613.1           | Nudt19       | 1.01 | -    | - | -       |
| 3951 | IPI00118502.1           | Nudt19       | 1.01 | -    | - | -       |
| 3952 | IPI00850543.1           | Mff          | 1.01 | -    | - | -       |
| 3953 | IPI00751009.1           | Srpk2        | 1.01 | 1.22 | - | 0.41351 |
| 3954 | IPI00330551.2           | Ndufaf2      | 1.02 | 0.99 | - | 0.98915 |
| 3955 | IPI00137601.2           | Taco1        | 1.02 | 0.97 | - | 0.93586 |
| 3956 | IPI00626501.3           | Kif1a        | 1.02 | 1.07 | - | -       |
| 3957 | IPI00230631.5           | Grk6         | 1.02 | -    | - | -       |
| 3958 | IPI00467856.4           | Grk6         | 1.02 | 1.28 | - | -       |
| 3959 | IPI00875987.1           | Grk6         | 1.02 | -    | - | -       |
| 3960 | IPI00404369.2           | Fam73a       | 1.02 | 1.14 | - | 0.70688 |
| 3961 | IPI00225194.4           | Fam73a       | 1.02 | -    | - | -       |
| 3962 | IPI00648443.1           | Fam54b       | 1.02 | -    | - | -       |
| 3963 | IPI00881233.1           | Fam54b       | 1.02 | -    | - | -       |
| 3964 | IPI00458939.5           | Fam54b       | 1.02 | -    | - | -       |
| 3965 | IPI00648686.1           | Fam54b       | 1.02 | -    | - | -       |
| 3966 | IPI00955120.1           | Usp19        | 1.02 | -    | - | -       |
| 3967 | IPI00420483.4           | Usp19        | 1.02 | -    | - | -       |
| 3968 | IPI00955070.1           | Usp19        | 1.02 | -    | - | -       |
| 3969 | IPI00955090.1           | Usp19        | 1.02 | -    | - | -       |
| 3970 | IPI00457619.2           | Usp19        | 1.02 | 1.10 | - | -       |
| 3971 | IPI00885941.1           | Tfg          | 1.03 | 0.86 | - | -       |
| 3972 | IPI00133361.2           | Mrpl52       | 1.03 | -    | - | -       |
| 3973 | IPI00850839.1           | LOC100045019 | 1.03 | -    | - | -       |
| 3974 | IPI00474873.3           | Lrrc16a      | 1.03 | 0.69 | - | -       |
| 3975 | IPI00460032.3           | Lrrc16a      | 1.03 | -    | - | -       |
| 3976 | IPI00406030.2           | Mprrip       | 1.03 | 3.33 | - | -       |
| 3977 | IPI00649483.1           | Elac2        | 1.03 | -    | - | -       |
| 3978 | IPI00400402.1           | Elac2        | 1.03 | -    | - | -       |
| 3979 | IPI00400401.1           | Elac2        | 1.03 | -    | - | -       |
| 3980 | IPI00623214.2           | Pitpnb       | 1.03 | 1.06 | - | 0.91146 |
| 3981 | IPI00229523.9           | Pitpnb       | 1.03 | -    | - | -       |
| 3982 | IPI00420170.1           | Agfg1        | 1.03 | -    | - | -       |
| 3983 | IPI00227199.1           | Atl2         | 1.03 | 1.06 | - | 0.6528  |
| 3984 | IPI00461142.2           | Atl2         | 1.03 | 1.01 | - | -       |
| 3985 | IPI00122175.1           | Tmem9b       | 1.03 | -    | - | -       |
| 3986 | IPI00785314.1           | Mog          | 1.04 | 1.07 | - | 0.54447 |
| 3987 | IPI00126405.3           | Mog          | 1.04 | -    | - | -       |
| 3988 | contaminant_UBIQUITIN11 |              | 1.04 | -    | - | -       |
| 3989 | IPI00762254.2           | Usp8         | 1.04 | -    | - | -       |
| 3990 | IPI00750601.1           | Usp8         | 1.04 | -    | - | -       |
| 3991 | IPI00171977.3           | Usp8         | 1.04 | -    | - | -       |
| 3992 | IPI00828763.2           | Pdpk1        | 1.04 | -    | - | -       |
| 3993 | IPI00831328.1           | Pdpk1        | 1.04 | -    | - | -       |
| 3994 | IPI00323609.3           | Pdpk1        | 1.04 | -    | - | -       |
| 3995 | IPI00831145.1           | Pdpk1        | 1.04 | 0.83 | - | -       |
| 3996 | IPI00775881.1           | Kctd12       | 1.04 | -    | - | -       |
| 3997 | IPI00323349.2           | Tjp2         | 1.04 | 0.67 | - | 0.31297 |
| 3998 | IPI00474125.3           | Atl2         | 1.04 | 1.19 | - | -       |
| 3999 | IPI00404595.3           | Lrrc8c       | 1.04 | 1.06 | - | 0.97801 |
| 4000 | IPI00411102.3           | Prps2        | 1.04 | 1.16 | - | -       |
| 4001 | IPI00955680.1           | Prps11       | 1.04 | -    | - | -       |

|      |               |                   |      |      |   |         |
|------|---------------|-------------------|------|------|---|---------|
| 4002 | IPI00844691.1 | Limch1            | 1.05 | -    | - | -       |
| 4003 | IPI00853814.1 | Limch1            | 1.05 | 0.74 | - | 0.37683 |
| 4004 | IPI00881525.1 | Limch1            | 1.05 | -    | - | -       |
| 4005 | IPI00881284.1 | Limch1            | 1.05 | -    | - | -       |
| 4006 | IPI00881328.1 | Limch1            | 1.05 | -    | - | -       |
| 4007 | IPI00121013.1 | Pea15a            | 1.05 | -    | - | -       |
| 4008 | IPI00830525.1 | Pea15a            | 1.05 | 0.87 | - | 0.50346 |
| 4009 | IPI00858299.1 | Abhd11            | 1.05 | 0.92 | - | 0.77811 |
| 4010 | IPI00128201.1 | Spryd4            | 1.05 | 0.95 | - | 0.85039 |
| 4011 | IPI00954603.1 | 1110057K04Rik     | 1.05 | 1.08 | - | -       |
| 4012 | IPI00222753.1 | Mterfd3           | 1.05 | 0.92 | - | 0.88962 |
| 4013 | IPI00406419.4 | Pepd              | 1.05 | -    | - | -       |
| 4014 | IPI00874597.1 | Pepd              | 1.05 | 0.96 | - | 0.76381 |
| 4015 | IPI00318204.5 | Prps1             | 1.05 | -    | - | -       |
| 4016 | IPI00676841.1 | Gm5081            | 1.05 | -    | - | -       |
| 4017 | IPI00554868.2 | Prps1             | 1.05 | 2.42 | - | 0.6995  |
| 4018 | IPI00654144.1 | Prps1             | 1.05 | -    | - | -       |
| 4019 | IPI00653091.1 | Prps1             | 1.05 | -    | - | -       |
| 4020 | IPI00222125.1 | Comtd1            | 1.05 | 0.86 | - | 0.45615 |
| 4021 | IPI00135311.2 | Mrpl19            | 1.05 | 1.11 | - | 0.73026 |
| 4022 | IPI00880727.1 | Aig1              | 1.05 | -    | - | -       |
| 4023 | IPI00111314.1 | Aig1              | 1.05 | -    | - | -       |
| 4024 | IPI00515716.1 | Aig1              | 1.05 | 0.77 | - | -       |
| 4025 | IPI00756092.1 | Magi2             | 1.06 | -    | - | -       |
| 4026 | IPI00650038.2 | Sort1             | 1.06 | 1.02 | - | 0.94858 |
| 4027 | IPI00420955.5 | Sort1             | 1.06 | -    | - | -       |
| 4028 | IPI00124501.1 | 1110067D22Rik     | 1.06 | 0.99 | - | 0.98022 |
| 4029 | IPI00130530.1 | Grhpr             | 1.06 | 0.97 | - | 0.93505 |
| 4030 | IPI00134792.1 | Mccc2             | 1.06 | -    | - | -       |
| 4031 | IPI00331244.4 | Ccdc22            | 1.06 | 1.25 | - | 0.57795 |
| 4032 | IPI00622364.4 | Snx1              | 1.06 | 0.94 | - | -       |
| 4033 | IPI00775828.1 | Vps26b            | 1.06 | -    | - | -       |
| 4034 | IPI00653120.3 | Map2k2            | 1.06 | -    | - | -       |
| 4035 | IPI00831515.3 | Bat2l2            | 1.07 | -    | - | -       |
| 4036 | IPI00903422.1 | Bat2l2            | 1.07 | -    | - | -       |
| 4037 | IPI00659535.3 | Bat2l2            | 1.07 | 1.04 | - | 0.92141 |
| 4038 | IPI00330171.7 | Bat2l2            | 1.07 | -    | - | -       |
| 4039 | IPI00830443.1 | Clpb              | 1.07 | 1.61 | - | 0.35843 |
| 4040 | IPI00875492.1 | Gpc4              | 1.07 | 0.70 | - | 0.35843 |
| 4041 | IPI00312407.1 | Gpc4              | 1.07 | -    | - | -       |
| 4042 | IPI00120166.1 | Slc30a1           | 1.07 | 1.05 | - | -       |
| 4043 | IPI00761714.2 | Csmd2             | 1.07 | -    | - | -       |
| 4044 | IPI00623776.3 | LOC674678         | 1.07 | -    | - | -       |
| 4045 | IPI00844736.1 | -                 | 1.07 | -    | - | -       |
| 4046 | IPI00329998.3 | -                 | 1.07 | -    | - | -       |
| 4047 | IPI00407339.7 | Hist1h4c;Hist1h4i | 1.07 | 0.93 | - | 0.73026 |
| 4048 | IPI00874920.1 | -                 | 1.07 | -    | - | -       |
| 4049 | IPI00876005.1 | -                 | 1.07 | -    | - | -       |
| 4050 | IPI00621374.1 | -                 | 1.07 | -    | - | -       |
| 4051 | IPI00621789.1 | -                 | 1.07 | -    | - | -       |
| 4052 | IPI00624840.2 | -                 | 1.07 | -    | - | -       |
| 4053 | IPI00624933.1 | -                 | 1.07 | -    | - | -       |

|      |               |                 |      |      |   |         |
|------|---------------|-----------------|------|------|---|---------|
| 4054 | IPI00850570.1 | LOC100047957    | 1.08 | -    | - | -       |
| 4055 | IPI00261542.1 | Fam168a         | 1.08 | -    | - | -       |
| 4056 | IPI00283461.4 | Fam168a         | 1.08 | -    | - | -       |
| 4057 | IPI00223360.1 | Mrps18b         | 1.08 | -    | - | -       |
| 4058 | IPI00895392.1 | Tfam            | 1.08 | -    | - | -       |
| 4059 | IPI00464208.3 | Atad3a          | 1.08 | -    | - | -       |
| 4060 | IPI00850525.1 | Upf1            | 1.08 | 1.17 | - | 0.35843 |
| 4061 | IPI00420949.3 | Upf1            | 1.08 | -    | - | -       |
| 4062 | IPI00753748.1 | Pofut1          | 1.09 | -    | - | -       |
| 4063 | IPI00131488.3 | Pofut1          | 1.09 | -    | - | -       |
| 4064 | IPI00554907.2 | Pofut1          | 1.09 | -    | - | -       |
| 4065 | IPI00652221.1 | Pofut1          | 1.09 | -    | - | -       |
| 4066 | IPI00378120.2 | Glrx5           | 1.09 | 1.33 | - | -       |
| 4067 | IPI00457661.5 | Psm5d5          | 1.09 | 1.00 | - | 0.96857 |
| 4068 | IPI00172189.1 | Cpne2           | 1.09 | -    | - | -       |
| 4069 | IPI00856899.1 | Cpne2           | 1.09 | 1.08 | - | 0.78569 |
| 4070 | IPI00282360.1 | Gm88            | 1.09 | 0.51 | - | 0.6869  |
| 4071 | IPI00551400.2 | Brsk2           | 1.09 | 0.93 | - | 0.75374 |
| 4072 | IPI00133553.1 | Mut             | 1.09 | -    | - | -       |
| 4073 | IPI00850737.1 | Mut             | 1.09 | 1.23 | - | 0.35616 |
| 4074 | IPI00315187.5 | 2400001E08Rik   | 1.09 | 1.29 | - | 0.35843 |
| 4075 | IPI00650050.1 | Rundc3a         | 1.10 | -    | - | -       |
| 4076 | IPI00649764.1 | Rundc3a         | 1.10 | -    | - | -       |
| 4077 | IPI00403618.4 | 6330407J23Rik   | 1.10 | 0.99 | - | 0.93074 |
| 4078 | IPI00462375.2 | 6330403A02Rik   | 1.10 | 1.02 | - | 0.86916 |
| 4079 | IPI00927957.1 | Ctsd            | 1.10 | -    | - | -       |
| 4080 | IPI00918565.1 | Ppm1h           | 1.10 | -    | - | -       |
| 4081 | IPI00130263.1 | Rnf126          | 1.10 | -    | - | -       |
| 4082 | IPI00848961.1 | LOC100045963    | 1.10 | -    | - | -       |
| 4083 | IPI00654328.2 | Mapk3           | 1.10 | -    | - | -       |
| 4084 | IPI00115240.1 | Mbp             | 1.10 | 0.95 | - | -       |
| 4085 | IPI00857267.1 | Cacna2d2        | 1.10 | -    | - | -       |
| 4086 | IPI00857221.1 | Cacna2d2;LOC100 | 1.10 | -    | - | -       |
| 4087 | IPI00111158.2 | Cacna2d2        | 1.10 | -    | - | -       |
| 4088 | IPI00339474.3 | Gm4957          | 1.10 | -    | - | -       |
| 4089 | IPI00463634.1 | Rpl12           | 1.10 | -    | - | -       |
| 4090 | IPI00230512.3 | Tfam            | 1.11 | 1.19 | - | 0.77869 |
| 4091 | IPI00112822.2 | Tfam            | 1.11 | -    | - | -       |
| 4092 | IPI00895166.1 | Tfam            | 1.11 | -    | - | -       |
| 4093 | IPI00387421.1 | Wdr37           | 1.11 | 0.90 | - | 0.49522 |
| 4094 | IPI00776142.1 | Gabra3          | 1.11 | 0.83 | - | 0.5982  |
| 4095 | IPI00110601.3 | Gabra3          | 1.11 | -    | - | -       |
| 4096 | IPI00467910.4 | Rab1            | 1.11 | -    | - | -       |
| 4097 | IPI00830204.1 | Hsph1           | 1.11 | -    | - | -       |
| 4098 | IPI00918346.1 | Cntn6           | 1.11 | -    | - | -       |
| 4099 | IPI00310105.2 | Ptk2b           | 1.12 | 0.81 | - | 0.76194 |
| 4100 | IPI00133132.1 | Ptk2b           | 1.12 | -    | - | -       |
| 4101 | IPI00453599.2 | Cfdp1           | 1.12 | -    | - | -       |
| 4102 | IPI00316479.7 | Ptpn11          | 1.12 | 0.85 | - | 0.59544 |
| 4103 | IPI00116554.2 | Ptpn11          | 1.12 | -    | - | -       |
| 4104 | IPI00177179.3 | Pvr             | 1.12 | -    | - | -       |
| 4105 | IPI00750596.1 | Mtch2           | 1.12 | -    | - | -       |

|      |               |               |      |      |   |         |
|------|---------------|---------------|------|------|---|---------|
| 4106 | IPI00754142.1 | Mtch2         | 1.12 | -    | - | -       |
| 4107 | IPI00669721.3 | LOC638059     | 1.12 | -    | - | -       |
| 4108 | IPI00751083.2 | Gm13767       | 1.12 | -    | - | -       |
| 4109 | IPI00880691.1 | Lphn3         | 1.12 | -    | - | -       |
| 4110 | IPI00462456.1 | Ubxn6         | 1.13 | -    | - | -       |
| 4111 | IPI00754112.1 | Spag9         | 1.13 | -    | - | -       |
| 4112 | IPI00626409.6 | Spag9         | 1.13 | -    | - | -       |
| 4113 | IPI00753495.1 | Spag9         | 1.13 | -    | - | -       |
| 4114 | IPI00462746.5 | Spag9         | 1.13 | -    | - | -       |
| 4115 | IPI00875851.1 | Spag9         | 1.13 | -    | - | -       |
| 4116 | IPI00876419.1 | Spag9         | 1.13 | -    | - | -       |
| 4117 | IPI00874614.1 | Spag9         | 1.13 | -    | - | -       |
| 4118 | IPI00475034.6 | Spag9         | 1.13 | 1.41 | - | 0.39385 |
| 4119 | IPI00405303.1 | Aldh3a2       | 1.13 | -    | - | -       |
| 4120 | IPI00881346.1 | Ilvbl         | 1.13 | -    | - | -       |
| 4121 | IPI00881209.1 | Ilvbl         | 1.13 | 1.13 | - | -       |
| 4122 | IPI00885254.1 | Slc25a1       | 1.13 | -    | - | -       |
| 4123 | IPI00761635.2 | Ube2v2        | 1.13 | 1.16 | - | -       |
| 4124 | IPI00894843.1 | Ube2v2        | 1.13 | -    | - | -       |
| 4125 | IPI00125577.1 | Vstm2b        | 1.14 | -    | - | -       |
| 4126 | IPI00121051.3 | Gstk1         | 1.14 | 0.83 | - | 0.47269 |
| 4127 | IPI00229298.1 | Epb4.1l3      | 1.14 | -    | - | -       |
| 4128 | IPI00845675.1 | Pfn2          | 1.14 | -    | - | -       |
| 4129 | IPI00776301.1 | Cd99l2        | 1.14 | -    | - | -       |
| 4130 | IPI00885307.1 | Cops3         | 1.14 | -    | - | -       |
| 4131 | IPI00757762.1 | LOC100046996  | 1.15 | 0.84 | - | 0.62171 |
| 4132 | IPI00118904.1 | Fnta          | 1.15 | -    | - | -       |
| 4133 | IPI00928176.1 | Aldh4a1       | 1.15 | 1.16 | - | 0.62289 |
| 4134 | IPI00460335.1 | Aldh4a1       | 1.15 | -    | - | -       |
| 4135 | IPI00110583.1 | Gng10         | 1.15 | 0.97 | - | -       |
| 4136 | IPI00115680.1 | Prkcsh        | 1.15 | -    | - | -       |
| 4137 | IPI00750828.1 | Mapk3         | 1.15 | -    | - | -       |
| 4138 | IPI00875624.2 | Slc4a3        | 1.15 | 2.07 | - | -       |
| 4139 | IPI00470963.3 | Slc4a3        | 1.15 | 0.89 | - | -       |
| 4140 | IPI00127267.4 | Gldc          | 1.15 | 1.37 | - | -       |
| 4141 | IPI00403373.1 | Gldc          | 1.15 | 1.04 | - | 0.90591 |
| 4142 | IPI00280967.3 | Tardbp        | 1.16 | 1.48 | - | -       |
| 4143 | IPI00459625.1 | Tardbp        | 1.16 | -    | - | -       |
| 4144 | IPI00807899.1 | Tardbp        | 1.16 | -    | - | -       |
| 4145 | IPI00515174.1 | Tardbp        | 1.16 | -    | - | -       |
| 4146 | IPI00515147.1 | Tardbp        | 1.16 | -    | - | -       |
| 4147 | IPI00453613.3 | Huwe1         | 1.16 | -    | - | -       |
| 4148 | IPI00120080.2 | Pnpla8        | 1.16 | -    | - | -       |
| 4149 | IPI00132923.1 | Gosr1         | 1.16 | -    | - | -       |
| 4150 | IPI00313559.3 | Gosr1         | 1.16 | 0.99 | - | 0.96616 |
| 4151 | IPI00124372.3 | Aldh9a1       | 1.16 | 0.99 | - | 0.97749 |
| 4152 | IPI00880213.1 | Gm15427       | 1.16 | 1.11 | - | 0.78964 |
| 4153 | IPI00162790.1 | Rpl18a        | 1.16 | 1.11 | - | -       |
| 4154 | IPI00830427.1 | Tpm1          | 1.16 | 0.90 | - | -       |
| 4155 | IPI00928557.1 | Plcb1         | 1.17 | -    | - | -       |
| 4156 | IPI00225209.1 | Ilvbl         | 1.17 | 0.92 | - | -       |
| 4157 | IPI00886009.2 | D630045J12Rik | 1.18 | 0.77 | - | 0.49522 |



|      |               |                 |      |      |   |         |
|------|---------------|-----------------|------|------|---|---------|
| 4158 | IPI00400301.2 | Cpox            | 1.18 | 1.17 | - | 0.47039 |
| 4159 | IPI00880360.1 | Tmem9b          | 1.18 | 1.24 | - | -       |
| 4160 | IPI00458238.2 | Cspg5           | 1.18 | -    | - | -       |
| 4161 | IPI00880610.1 | 5730469M10Rik   | 1.18 | 1.12 | - | 0.47039 |
| 4162 | IPI00187272.3 | 5730469M10Rik   | 1.18 | -    | - | -       |
| 4163 | IPI00133920.3 | Sec13           | 1.18 | 1.09 | - | 0.86916 |
| 4164 | IPI00406217.2 | Mgrn1           | 1.19 | 1.03 | - | 0.95947 |
| 4165 | IPI00460741.3 | Mgrn1           | 1.19 | -    | - | -       |
| 4166 | IPI00775949.1 | Mgrn1           | 1.19 | -    | - | -       |
| 4167 | IPI00187513.3 | Mgrn1           | 1.19 | -    | - | -       |
| 4168 | IPI00380722.1 | Bat2            | 1.19 | 1.03 | - | 0.94121 |
| 4169 | IPI00751974.1 | Snta1           | 1.20 | 1.23 | - | 0.46266 |
| 4170 | IPI00267848.5 | Snta1           | 1.20 | -    | - | -       |
| 4171 | IPI00654325.1 | Ppp3cb          | 1.20 | -    | - | -       |
| 4172 | IPI00755389.2 | Prpsap1         | 1.20 | 0.97 | - | 0.9364  |
| 4173 | IPI00132470.1 | Mrpl11          | 1.20 | 1.22 | - | -       |
| 4174 | IPI00228306.3 | Akt3            | 1.20 | -    | - | -       |
| 4175 | IPI00124450.1 | Akt3            | 1.20 | -    | - | -       |
| 4176 | IPI00338270.5 | Erlc1           | 1.20 | 1.07 | - | 0.9111  |
| 4177 | IPI00464280.2 | Epn2            | 1.21 | -    | - | -       |
| 4178 | IPI00310131.5 | Ap2a2           | 1.21 | -    | - | -       |
| 4179 | IPI00848970.1 | Pgam5           | 1.21 | 1.54 | - | 0.35843 |
| 4180 | IPI00857810.1 | Bai3            | 1.21 | -    | - | -       |
| 4181 | IPI00187338.2 | Bai3            | 1.21 | 0.96 | - | -       |
| 4182 | IPI00132942.1 | Nudc            | 1.21 | 1.14 | - | 0.7214  |
| 4183 | IPI00648879.1 | Fkbp15;Cdc26    | 1.21 | -    | - | -       |
| 4184 | IPI00649188.3 | Fkbp15;Cdc26    | 1.21 | -    | - | -       |
| 4185 | IPI00265407.8 | Clip3           | 1.22 | 0.83 | - | -       |
| 4186 | IPI00874955.1 | Al314180        | 1.22 | -    | - | -       |
| 4187 | IPI00321646.3 | Al314180        | 1.22 | -    | - | -       |
| 4188 | IPI00553357.1 | Al314180        | 1.22 | 0.70 | - | 0.64234 |
| 4189 | IPI00828748.1 | Al314180        | 1.22 | -    | - | -       |
| 4190 | IPI00648105.1 | Prdx1           | 1.22 | -    | - | -       |
| 4191 | IPI00648615.3 | Prdx1           | 1.22 | -    | - | -       |
| 4192 | IPI00649645.1 | Prdx1           | 1.22 | -    | - | -       |
| 4193 | IPI00109293.1 | Lactb;LOC677144 | 1.22 | 0.93 | - | 0.65671 |
| 4194 | IPI00229808.1 | Vps53           | 1.22 | -    | - | -       |
| 4195 | IPI00387427.3 | Vps53           | 1.22 | 0.85 | - | 0.57679 |
| 4196 | IPI00881714.1 | Lphn3           | 1.22 | -    | - | -       |
| 4197 | IPI00882084.1 | Lphn3           | 1.22 | -    | - | -       |
| 4198 | IPI00816975.2 | Lphn3           | 1.22 | -    | - | -       |
| 4199 | IPI00880421.1 | Lphn3           | 1.22 | -    | - | -       |
| 4200 | IPI00882082.1 | Lphn3           | 1.22 | -    | - | -       |
| 4201 | IPI00411158.2 | Lphn3           | 1.22 | 0.74 | - | 0.51846 |
| 4202 | IPI00880762.1 | Lphn3           | 1.22 | -    | - | -       |
| 4203 | IPI00882244.1 | Lphn3           | 1.22 | -    | - | -       |
| 4204 | IPI00881441.1 | Lphn3           | 1.22 | -    | - | -       |
| 4205 | IPI00112785.1 | Trappc4         | 1.23 | 0.73 | - | 0.49476 |
| 4206 | IPI00407061.1 | Rptor           | 1.23 | -    | - | -       |
| 4207 | IPI00170249.1 | Rptor           | 1.23 | -    | - | -       |
| 4208 | IPI00411051.4 | Rptor           | 1.23 | -    | - | -       |
| 4209 | IPI00320850.3 | Mccc1           | 1.23 | 1.09 | - | 0.66692 |

|      |               |               |      |      |   |         |
|------|---------------|---------------|------|------|---|---------|
| 4210 | IPI00652521.1 | Mccc1         | 1.23 | -    | - | -       |
| 4211 | IPI00831107.1 | Asah1         | 1.23 | -    | - | -       |
| 4212 | IPI00322698.7 | Trpv2         | 1.23 | 0.96 | - | 0.88955 |
| 4213 | IPI00311443.1 | Tspan2        | 1.23 | -    | - | -       |
| 4214 | IPI00880733.1 | Tspan2        | 1.23 | 0.90 | - | 0.61162 |
| 4215 | IPI00230440.6 | Ahcy;Gm9826   | 1.23 | 0.90 | - | 0.78422 |
| 4216 | IPI00224252.5 | Sel1l         | 1.23 | 0.95 | - | 0.84491 |
| 4217 | IPI00131143.1 | Sel1l         | 1.23 | -    | - | -       |
| 4218 | IPI00858238.1 | Ndufa3        | 1.23 | -    | - | -       |
| 4219 | IPI00918954.1 | Pgm2l1        | 1.24 | -    | - | -       |
| 4220 | IPI00776190.1 | Ocr1          | 1.24 | 0.84 | - | 0.79353 |
| 4221 | IPI00403814.4 | Ocr1          | 1.24 | -    | - | -       |
| 4222 | IPI00674104.2 | LOC634842     | 1.24 | 0.92 | - | 0.93152 |
| 4223 | IPI00226492.3 | Fam171b       | 1.24 | -    | - | -       |
| 4224 | IPI00845605.1 | Fam171b       | 1.24 | -    | - | -       |
| 4225 | IPI00874907.2 | Nbas          | 1.24 | 1.04 | - | 0.86896 |
| 4226 | IPI00848536.1 | Gm7204        | 1.24 | -    | - | -       |
| 4227 | IPI00605254.5 | Gm7204        | 1.24 | -    | - | -       |
| 4228 | IPI00331745.2 | Lxn           | 1.24 | 0.98 | - | 0.94277 |
| 4229 | IPI00121552.2 | Umps          | 1.24 | 1.21 | - | -       |
| 4230 | IPI00221782.3 | 4933403F05Rik | 1.24 | 1.23 | - | 0.49522 |
| 4231 | IPI00130758.1 | Itm2b         | 1.24 | 1.10 | - | 0.45615 |
| 4232 | IPI00331212.3 | Arhgef7       | 1.24 | 0.75 | - | 0.54447 |
| 4233 | IPI00828536.1 | Arhgef7       | 1.24 | -    | - | -       |
| 4234 | IPI00387322.6 | Arhgef7       | 1.24 | -    | - | -       |
| 4235 | IPI00828966.1 | Arhgef7       | 1.24 | -    | - | -       |
| 4236 | IPI00555113.2 | Rpl18         | 1.24 | 1.22 | - | 0.38012 |
| 4237 | IPI00225028.1 | Tcp11l1       | 1.25 | 1.03 | - | 0.96924 |
| 4238 | IPI00655135.1 | Ppp2r1b       | 1.25 | 0.93 | - | -       |
| 4239 | IPI00222306.5 | Ppp2r1b       | 1.25 | -    | - | -       |
| 4240 | IPI00126634.1 | Poldip2       | 1.25 | 1.18 | - | 0.54447 |
| 4241 | IPI00229184.3 | Hapln4        | 1.25 | 0.57 | - | 0.53529 |
| 4242 | IPI00137439.1 | Map2k6        | 1.25 | -    | - | -       |
| 4243 | IPI00341584.6 | Exoc4         | 1.25 | -    | - | -       |
| 4244 | IPI00649141.3 | Vps13d        | 1.25 | -    | - | -       |
| 4245 | IPI00664030.4 | Vps13d        | 1.25 | 0.95 | - | 0.84321 |
| 4246 | IPI00406263.2 | Epb4.1l3      | 1.25 | -    | - | -       |
| 4247 | IPI00229299.1 | Epb4.1l3      | 1.25 | -    | - | -       |
| 4248 | IPI00753793.2 | Spna2         | 1.25 | -    | - | -       |
| 4249 | IPI00322431.9 | Picl2         | 1.25 | 0.77 | - | 0.59544 |
| 4250 | IPI00849506.1 | LOC100046895  | 1.26 | -    | - | -       |
| 4251 | IPI00759885.1 | Qk            | 1.26 | -    | - | -       |
| 4252 | IPI00136596.1 | Qk            | 1.26 | 0.98 | - | 0.88528 |
| 4253 | IPI00759906.1 | Qk            | 1.26 | -    | - | -       |
| 4254 | IPI00759871.1 | Qk            | 1.26 | -    | - | -       |
| 4255 | IPI00130483.1 | Qk            | 1.26 | -    | - | -       |
| 4256 | IPI00760097.1 | Qk            | 1.26 | -    | - | -       |
| 4257 | IPI00759892.1 | Qk            | 1.26 | -    | - | -       |
| 4258 | IPI00885650.1 | Dmxl2         | 1.26 | -    | - | -       |
| 4259 | IPI00750771.5 | Arhgap21      | 1.26 | 0.76 | - | 0.74452 |
| 4260 | IPI00918972.1 | Arhgap21      | 1.26 | -    | - | -       |
| 4261 | IPI00918720.1 | Arhgap21      | 1.26 | -    | - | -       |

|      |               |              |      |      |   |         |
|------|---------------|--------------|------|------|---|---------|
| 4262 | IPI00677367.7 | Arhgap21     | 1.26 | -    | - | -       |
| 4263 | IPI00848555.1 | Gm4596       | 1.26 | -    | - | -       |
| 4264 | IPI00123379.1 | Hdlbp        | 1.26 | 1.15 | - | 0.51784 |
| 4265 | IPI00109740.3 | Mrpl2        | 1.26 | -    | - | -       |
| 4266 | IPI00856991.1 | Mrpl2        | 1.26 | 1.49 | - | -       |
| 4267 | IPI00828965.1 | Echdc1       | 1.27 | 1.19 | - | 0.47166 |
| 4268 | IPI00187288.6 | Echdc1       | 1.27 | -    | - | -       |
| 4269 | IPI00124938.1 | Uchl5        | 1.27 | -    | - | -       |
| 4270 | IPI00230763.1 | Uchl5        | 1.27 | 0.79 | - | -       |
| 4271 | IPI00857469.1 | Cryz         | 1.27 | -    | - | -       |
| 4272 | IPI00857341.1 | Cryz         | 1.27 | -    | - | -       |
| 4273 | IPI00857537.1 | Cryz         | 1.27 | -    | - | -       |
| 4274 | IPI00134704.1 | Cryz         | 1.27 | -    | - | -       |
| 4275 | IPI00857132.1 | Cryz         | 1.27 | 0.79 | - | 0.35616 |
| 4276 | IPI00457538.2 | Urm1         | 1.27 | -    | - | -       |
| 4277 | IPI00331111.1 | Ccbl1        | 1.27 | -    | - | -       |
| 4278 | IPI00756851.1 | Ccbl1        | 1.27 | -    | - | -       |
| 4279 | IPI00387217.1 | Cul2         | 1.27 | 1.25 | - | 0.47426 |
| 4280 | IPI00321499.1 | Bcl2l13      | 1.27 | -    | - | -       |
| 4281 | IPI00312507.2 | Opa3         | 1.27 | 1.16 | - | 0.35843 |
| 4282 | IPI00405648.1 | Chid1        | 1.28 | -    | - | -       |
| 4283 | IPI00467127.5 | Chid1        | 1.28 | 1.03 | - | 0.9301  |
| 4284 | IPI00648688.3 | Spag9        | 1.28 | -    | - | -       |
| 4285 | IPI00551331.1 | Spag9        | 1.28 | -    | - | -       |
| 4286 | IPI00947600.1 | Mrps2        | 1.28 | 1.12 | - | 0.63837 |
| 4287 | IPI00126011.1 | Mrps2        | 1.28 | -    | - | -       |
| 4288 | IPI00798592.1 | Spna2        | 1.28 | -    | - | -       |
| 4289 | IPI00125853.1 | Slc25a15     | 1.28 | 2.11 | - | -       |
| 4290 | IPI00117986.3 | Slc12a9      | 1.28 | 0.97 | - | 0.9364  |
| 4291 | IPI00336714.1 | Bcas3        | 1.28 | -    | - | -       |
| 4292 | IPI00400411.3 | Lzts1        | 1.28 | -    | - | -       |
| 4293 | IPI00954671.1 | Lzts1        | 1.28 | -    | - | -       |
| 4294 | IPI00828723.1 | Arhgef7      | 1.28 | -    | - | -       |
| 4295 | IPI00828241.1 | Arhgef7      | 1.28 | -    | - | -       |
| 4296 | IPI00230704.4 | Arhgef7      | 1.28 | -    | - | -       |
| 4297 | IPI00655136.3 | Arhgef7      | 1.28 | -    | - | -       |
| 4298 | IPI00755748.1 | Galnt1       | 1.28 | 0.93 | - | -       |
| 4299 | IPI00464268.4 | Galnt1       | 1.28 | -    | - | -       |
| 4300 | IPI00757201.1 | LOC100045018 | 1.29 | -    | - | -       |
| 4301 | IPI00881636.1 | Chid1        | 1.29 | -    | - | -       |
| 4302 | IPI00309419.2 | Lrrc4c       | 1.29 | 0.86 | - | 0.79187 |
| 4303 | IPI00464151.3 | Tmem132a     | 1.29 | -    | - | -       |
| 4304 | IPI00927963.1 | Slc25a44     | 1.29 | -    | - | -       |
| 4305 | IPI00808423.1 | Slc25a44     | 1.29 | -    | - | -       |
| 4306 | IPI00402910.5 | Slc25a44     | 1.29 | -    | - | -       |
| 4307 | IPI00928402.1 | Slc25a44     | 1.29 | 1.16 | - | 0.76574 |
| 4308 | IPI00649114.1 | Tprgl        | 1.29 | 1.11 | - | -       |
| 4309 | IPI00262743.6 | Tecr         | 1.29 | 1.01 | - | 0.96735 |
| 4310 | IPI00133528.1 | Golph3       | 1.29 | 1.11 | - | 0.49522 |
| 4311 | IPI00828569.2 | Fat3         | 1.30 | -    | - | -       |
| 4312 | IPI00896093.1 | Phyhipl      | 1.30 | -    | - | -       |
| 4313 | IPI00224093.2 | Phyhipl      | 1.30 | 0.93 | - | 0.53529 |

|      |               |                 |      |      |   |         |
|------|---------------|-----------------|------|------|---|---------|
| 4314 | IPI00380354.1 | Llg1            | 1.30 | -    | - | -       |
| 4315 | IPI00929905.1 | Llg1            | 1.30 | -    | - | -       |
| 4316 | IPI00649658.1 | Llg1            | 1.30 | 0.83 | - | 0.50973 |
| 4317 | IPI00124906.1 | Cdc42ep4        | 1.30 | -    | - | -       |
| 4318 | IPI00876514.1 | Osbp            | 1.30 | 0.72 | - | -       |
| 4319 | IPI00129755.2 | Serpina1b       | 1.30 | -    | - | -       |
| 4320 | IPI00754546.2 | Ankrd34a        | 1.31 | 0.49 | - | -       |
| 4321 | IPI00330094.4 | Cpt1a           | 1.31 | 1.05 | - | 0.77622 |
| 4322 | IPI00649973.1 | Hsd12           | 1.31 | 0.97 | - | 0.81575 |
| 4323 | IPI00117214.3 | Hsd12           | 1.31 | -    | - | -       |
| 4324 | IPI00674554.2 | Dmx1l           | 1.31 | 0.68 | - | 0.65555 |
| 4325 | IPI00131357.7 | Rps23           | 1.31 | -    | - | -       |
| 4326 | IPI00955718.1 | LOC100046668;Ri | 1.31 | 1.21 | - | 0.35843 |
| 4327 | IPI00918051.1 | Grip1           | 1.32 | -    | - | -       |
| 4328 | IPI00918379.1 | Grip1           | 1.32 | -    | - | -       |
| 4329 | IPI00919075.1 | Grip1           | 1.32 | -    | - | -       |
| 4330 | IPI00918966.1 | Grip1           | 1.32 | -    | - | -       |
| 4331 | IPI00399863.3 | Grip1           | 1.32 | -    | - | -       |
| 4332 | IPI00918462.1 | Grip1           | 1.32 | -    | - | -       |
| 4333 | IPI00127232.3 | Grip1           | 1.32 | -    | - | -       |
| 4334 | IPI00918581.1 | Grip1           | 1.32 | -    | - | -       |
| 4335 | IPI00918292.1 | Grip1           | 1.32 | -    | - | -       |
| 4336 | IPI00918506.1 | Grip1           | 1.32 | -    | - | -       |
| 4337 | IPI00269503.1 | Grip1           | 1.32 | -    | - | -       |
| 4338 | IPI00467886.2 | Grip1           | 1.32 | -    | - | -       |
| 4339 | IPI00409947.1 | Grip1           | 1.32 | -    | - | -       |
| 4340 | IPI00420752.7 | Mccc2           | 1.32 | -    | - | -       |
| 4341 | IPI00380734.2 | Actr3b          | 1.32 | 1.13 | - | 0.44201 |
| 4342 | IPI00915505.1 | Ptprs           | 1.32 | -    | - | -       |
| 4343 | IPI00127492.1 | Smcp1           | 1.32 | 0.91 | - | 0.53529 |
| 4344 | IPI00845798.1 | Fam73a          | 1.32 | -    | - | -       |
| 4345 | IPI00882290.1 | 5730469M10Rik   | 1.32 | -    | - | -       |
| 4346 | IPI00880502.1 | 5730469M10Rik   | 1.32 | -    | - | -       |
| 4347 | IPI00880354.1 | 5730469M10Rik   | 1.32 | -    | - | -       |
| 4348 | IPI00882173.1 | 5730469M10Rik   | 1.32 | -    | - | -       |
| 4349 | IPI00858239.1 | Bai3            | 1.33 | -    | - | -       |
| 4350 | IPI00275512.1 | Ppm1f           | 1.33 | 0.86 | - | -       |
| 4351 | IPI00133562.1 | Chchd3          | 1.33 | 1.23 | - | 0.3547  |
| 4352 | IPI00466699.3 | Gria2           | 1.33 | -    | - | -       |
| 4353 | IPI00751228.2 | Gria2           | 1.33 | -    | - | -       |
| 4354 | IPI00830369.1 | Tmem214         | 1.34 | 1.46 | - | -       |
| 4355 | IPI00222924.3 | Tmem214         | 1.34 | -    | - | -       |
| 4356 | IPI00886355.1 | Tmem214         | 1.34 | -    | - | -       |
| 4357 | IPI00276222.1 | Fermt2          | 1.34 | 1.11 | - | 0.75478 |
| 4358 | IPI00110124.1 | Ccdc132         | 1.35 | -    | - | -       |
| 4359 | IPI00853890.2 | LOC100048816    | 1.35 | -    | - | -       |
| 4360 | IPI00895277.1 | Bai2            | 1.35 | -    | - | -       |
| 4361 | IPI00319528.6 | Bai2            | 1.35 | -    | - | -       |
| 4362 | IPI00880680.2 | LOC100048816    | 1.35 | -    | - | -       |
| 4363 | IPI00895401.1 | LOC100048816    | 1.35 | -    | - | -       |
| 4364 | IPI00895291.1 | LOC100048816    | 1.35 | -    | - | -       |
| 4365 | IPI00623397.4 | Bai2            | 1.35 | 0.88 | - | -       |

|      |               |                 |      |      |   |         |
|------|---------------|-----------------|------|------|---|---------|
| 4366 | IPI00648090.2 | Bai2            | 1.35 | -    | - | -       |
| 4367 | IPI00124411.2 | Ptplb           | 1.35 | 0.92 | - | 0.79634 |
| 4368 | IPI00274222.2 | Acad8           | 1.36 | 1.37 | - | 0.37683 |
| 4369 | IPI00125645.1 | Adcy8           | 1.36 | -    | - | -       |
| 4370 | IPI00109040.1 | Ttc9b           | 1.36 | 0.87 | - | -       |
| 4371 | IPI00459759.2 | Tmem163         | 1.36 | 1.33 | - | 0.59431 |
| 4372 | IPI00136284.1 | Rnf11           | 1.36 | -    | - | -       |
| 4373 | IPI00648669.1 | Rnf11           | 1.36 | 0.74 | - | -       |
| 4374 | IPI00851031.1 | Raph1           | 1.36 | 0.69 | - | 0.49522 |
| 4375 | IPI00881016.1 | Hint3           | 1.36 | 0.56 | - | -       |
| 4376 | IPI00857038.1 | Rps19           | 1.36 | -    | - | -       |
| 4377 | IPI00664029.2 |                 | 1.36 | -    | - | -       |
| 4378 | IPI00856927.1 | Rps19           | 1.36 | -    | - | -       |
| 4379 | IPI00113241.7 | Rps19           | 1.36 | -    | - | -       |
| 4380 | IPI00350414.6 | Gm13143         | 1.36 | -    | - | -       |
| 4381 | IPI00875929.1 | Gm4327;Gm8683   | 1.36 | -    | - | -       |
| 4382 | IPI00875584.1 | Rps19           | 1.36 | -    | - | -       |
| 4383 | IPI00665513.3 | Gm6636          | 1.36 | 1.13 | - | 0.35843 |
| 4384 | IPI00856352.1 | Rps19           | 1.36 | -    | - | -       |
| 4385 | IPI00125787.4 | Gm14072         | 1.36 | -    | - | -       |
| 4386 | IPI00653438.1 | Tpbg            | 1.37 | 0.76 | - | 0.73026 |
| 4387 | IPI00468202.4 | Tpbg            | 1.37 | -    | - | -       |
| 4388 | IPI00955700.1 | Ube2d3          | 1.37 | -    | - | -       |
| 4389 | IPI00265279.1 | LOC100044056;G  | 1.37 | -    | - | -       |
| 4390 | IPI00312018.6 | Mlec            | 1.37 | 1.30 | - | 0.31297 |
| 4391 | IPI00876431.1 | Inpp4a          | 1.37 | -    | - | -       |
| 4392 | IPI00785480.2 | Inpp4a          | 1.37 | -    | - | -       |
| 4393 | IPI00466701.3 | Fnbp1           | 1.38 | 1.01 | - | -       |
| 4394 | IPI00876259.1 | Fnbp1           | 1.38 | -    | - | -       |
| 4395 | IPI00750171.1 | Fnbp1           | 1.38 | -    | - | -       |
| 4396 | IPI00808090.1 | Fnbp1           | 1.38 | -    | - | -       |
| 4397 | IPI00752749.2 | Fnbp1           | 1.38 | -    | - | -       |
| 4398 | IPI00116278.4 | Fnbp1           | 1.38 | -    | - | -       |
| 4399 | IPI00626520.3 | Fnbp1           | 1.38 | -    | - | -       |
| 4400 | IPI00755941.2 | Fnbp1           | 1.38 | -    | - | -       |
| 4401 | IPI00874767.1 | Fnbp1           | 1.38 | -    | - | -       |
| 4402 | IPI00755613.1 | Fnbp1           | 1.38 | -    | - | -       |
| 4403 | IPI00135068.1 | Timm44          | 1.38 | -    | - | -       |
| 4404 | IPI00889924.1 | Timm44          | 1.38 | 1.23 | - | 0.46266 |
| 4405 | IPI00405703.4 | Ptpra           | 1.39 | -    | - | -       |
| 4406 | IPI00336550.5 | Ptpra           | 1.39 | 3.70 | - | 0.71562 |
| 4407 | IPI00108685.3 | Ptpra           | 1.39 | -    | - | -       |
| 4408 | IPI00132768.1 | Tmem14c         | 1.39 | 0.76 | - | 0.53529 |
| 4409 | IPI00404474.1 | Faah            | 1.39 | 1.08 | - | 0.65482 |
| 4410 | IPI00653794.2 | Rap1gds1        | 1.39 | 0.89 | - | 0.61644 |
| 4411 | IPI00652463.3 | Slc26a6         | 1.39 | -    | - | -       |
| 4412 | IPI00319828.1 | Slc26a6         | 1.39 | -    | - | -       |
| 4413 | IPI00138716.1 | Rap2b           | 1.39 | 0.90 | - | 0.79297 |
| 4414 | IPI00466588.3 | Rap2c;LOC10004: | 1.39 | 1.03 | - | 0.87475 |
| 4415 | IPI00775869.1 | Fhl1            | 1.39 | -    | - | -       |
| 4416 | IPI00406672.3 | Fhl1            | 1.39 | 0.86 | - | -       |
| 4417 | IPI00776276.1 | Fhl1            | 1.39 | -    | - | -       |

|      |               |              |      |      |   |         |
|------|---------------|--------------|------|------|---|---------|
| 4418 | IPI00775906.1 | Fhl1         | 1.39 | -    | - | -       |
| 4419 | IPI00409345.3 | Cry1         | 1.39 | 1.27 | - | 0.57968 |
| 4420 | IPI00331736.3 | Pip5k1a      | 1.39 | -    | - | -       |
| 4421 | IPI00831529.1 | Pip5k1a      | 1.39 | -    | - | -       |
| 4422 | IPI00858194.2 | Pip5k1a      | 1.39 | -    | - | -       |
| 4423 | IPI00830152.1 | Pip5k1a      | 1.39 | -    | - | -       |
| 4424 | IPI00475262.3 | Pip5k1a      | 1.39 | -    | - | -       |
| 4425 | IPI00122075.1 | Mavs         | 1.40 | 1.13 | - | 0.70572 |
| 4426 | IPI00857603.1 | Cacna2d2     | 1.40 | -    | - | -       |
| 4427 | IPI00856877.1 | Cacna2d2     | 1.40 | 0.73 | - | 0.45615 |
| 4428 | IPI00751689.3 | Cacna2d2     | 1.40 | -    | - | -       |
| 4429 | IPI00671847.3 | Ppp1r12a     | 1.40 | -    | - | -       |
| 4430 | IPI00876048.1 | Ppp1r12a     | 1.40 | 1.06 | - | 0.75519 |
| 4431 | IPI00845753.1 | Cyb5r2       | 1.40 | -    | - | -       |
| 4432 | IPI00310925.5 | Cyb5r2       | 1.40 | -    | - | -       |
| 4433 | IPI00761797.1 | Sh3bp2       | 1.40 | -    | - | -       |
| 4434 | IPI00331306.7 | Sh3bp2       | 1.40 | -    | - | -       |
| 4435 | IPI00881074.1 | Sh3bp2       | 1.40 | -    | - | -       |
| 4436 | IPI00556699.1 | Gcsh         | 1.40 | 0.98 | - | 0.96735 |
| 4437 | IPI00881597.1 | Mras         | 1.41 | -    | - | -       |
| 4438 | IPI00117357.1 | Mras         | 1.41 | 0.87 | - | 0.77388 |
| 4439 | IPI00817018.2 | Usp7         | 1.41 | -    | - | -       |
| 4440 | IPI00463367.2 | Usp7         | 1.41 | -    | - | -       |
| 4441 | IPI00816922.1 | Usp7         | 1.41 | 0.85 | - | 0.50245 |
| 4442 | IPI00894786.1 | Lancl1       | 1.41 | 1.02 | - | 0.9364  |
| 4443 | IPI00131535.1 | Lancl1       | 1.41 | -    | - | -       |
| 4444 | IPI00930758.1 | Sars2        | 1.41 | 1.28 | - | 0.40793 |
| 4445 | IPI00421218.5 | Tln2         | 1.41 | -    | - | -       |
| 4446 | IPI00607961.1 | Tmem33       | 1.41 | 1.05 | - | 0.80273 |
| 4447 | IPI00133234.1 | Tmem33       | 1.41 | -    | - | -       |
| 4448 | IPI00331016.1 | Sec24b       | 1.41 | -    | - | -       |
| 4449 | IPI00652925.3 | LOC100047481 | 1.41 | 1.10 | - | 0.53529 |
| 4450 | IPI00473680.2 | Tmed9        | 1.41 | -    | - | -       |
| 4451 | IPI00845689.1 | Tmed9        | 1.41 | 1.24 | - | 0.47039 |
| 4452 | IPI00131903.1 | Hint3        | 1.42 | -    | - | -       |
| 4453 | IPI00138190.1 | Cdh11        | 1.42 | 2.79 | - | -       |
| 4454 | IPI00125450.3 | Nme3         | 1.43 | 1.11 | - | 0.71119 |
| 4455 | IPI00131369.1 | Gabrg2       | 1.43 | -    | - | -       |
| 4456 | IPI00111211.1 | Mrpl46       | 1.43 | 0.96 | - | 0.88143 |
| 4457 | IPI00319914.3 | Rcan1        | 1.43 | -    | - | -       |
| 4458 | IPI00128307.2 | Rcan1        | 1.43 | -    | - | -       |
| 4459 | IPI00331535.1 | Rcan1        | 1.43 | -    | - | -       |
| 4460 | IPI00282748.4 | Bin1         | 1.43 | -    | - | -       |
| 4461 | IPI00458777.2 | Bin1         | 1.43 | -    | - | -       |
| 4462 | IPI00648630.1 | Camk2b       | 1.43 | -    | - | -       |
| 4463 | IPI00929758.1 | Tln1         | 1.43 | 0.99 | - | 0.96594 |
| 4464 | IPI00465786.3 | Tln1         | 1.43 | -    | - | -       |
| 4465 | IPI00351246.3 | Mpp3         | 1.43 | 0.94 | - | 0.87629 |
| 4466 | IPI00555002.1 | Rap2a        | 1.44 | -    | - | -       |
| 4467 | IPI00118022.1 | Ap2s1        | 1.44 | 0.90 | - | 0.62095 |
| 4468 | IPI00876402.1 | Ap2s1        | 1.44 | 0.66 | - | -       |
| 4469 | IPI00230113.5 | Cyb5         | 1.44 | -    | - | -       |

|      |               |              |      |      |   |         |
|------|---------------|--------------|------|------|---|---------|
| 4470 | IPI00918942.1 | Cyb5         | 1.44 | 0.88 | - | 0.57338 |
| 4471 | IPI00221857.1 | Pgs1         | 1.44 | 0.89 | - | 0.54712 |
| 4472 | IPI00886083.1 | Pgs1         | 1.44 | -    | - | -       |
| 4473 | IPI00881206.1 | Mccc1        | 1.44 | -    | - | -       |
| 4474 | IPI00849866.1 | Pdp1         | 1.44 | 0.99 | - | 0.95722 |
| 4475 | IPI00672824.3 | Pdp1         | 1.44 | -    | - | -       |
| 4476 | IPI00850694.2 | Pdp1         | 1.44 | -    | - | -       |
| 4477 | IPI00857971.1 | Pdp1         | 1.44 | -    | - | -       |
| 4478 | IPI00857710.1 | Cops4        | 1.46 | -    | - | -       |
| 4479 | IPI00649913.1 | Lasp1        | 1.46 | -    | - | -       |
| 4480 | IPI00135730.1 | Arf2         | 1.46 | -    | - | -       |
| 4481 | IPI00263874.3 | Farsa        | 1.46 | -    | - | -       |
| 4482 | IPI00754704.2 | Farsa        | 1.46 | 1.28 | - | 0.35843 |
| 4483 | IPI00315463.4 | Reep5        | 1.46 | 0.96 | - | 0.84581 |
| 4484 | IPI00169804.1 | Lym4         | 1.46 | 1.44 | - | 0.37683 |
| 4485 | IPI00226416.3 | Gprin3       | 1.46 | 0.57 | - | -       |
| 4486 | IPI00331463.1 | Atpif1       | 1.47 | 0.93 | - | 0.66208 |
| 4487 | IPI00127598.1 | Atpif1       | 1.47 | -    | - | -       |
| 4488 | IPI00309285.5 | Hccs         | 1.47 | 1.23 | - | 0.47039 |
| 4489 | IPI00134572.1 | Hccs         | 1.47 | -    | - | -       |
| 4490 | IPI00648357.1 | Slc25a11     | 1.47 | -    | - | -       |
| 4491 | IPI00885610.1 | Scamp3       | 1.48 | -    | - | -       |
| 4492 | IPI00653426.2 | Scamp3       | 1.48 | 0.86 | - | 0.47039 |
| 4493 | IPI00132604.3 | Scamp3       | 1.48 | -    | - | -       |
| 4494 | IPI00649267.5 | Hgs          | 1.48 | -    | - | -       |
| 4495 | IPI00929837.1 | Hgs          | 1.48 | 1.08 | - | 0.77883 |
| 4496 | IPI00605489.3 | Otud7b       | 1.48 | -    | - | -       |
| 4497 | IPI00112128.1 | Hdhd3        | 1.48 | 1.04 | - | 0.83925 |
| 4498 | IPI00849280.1 | LOC100048642 | 1.48 | -    | - | -       |
| 4499 | IPI00875552.2 | Ttyh1        | 1.48 | -    | - | -       |
| 4500 | IPI00850311.1 | LOC100044107 | 1.49 | -    | - | -       |
| 4501 | IPI00468079.3 | Elmo2        | 1.49 | 0.71 | - | -       |
| 4502 | IPI00875068.1 | Tecr         | 1.49 | -    | - | -       |
| 4503 | IPI00929787.1 | Tecr         | 1.49 | -    | - | -       |
| 4504 | IPI00849398.1 | LOC100046434 | 1.49 | -    | - | -       |
| 4505 | IPI00403909.2 | Armc6        | 1.50 | 0.93 | - | -       |
| 4506 | IPI00762866.1 | Armc6        | 1.50 | -    | - | -       |
| 4507 | IPI00110402.1 | Grm1         | 1.50 | -    | - | -       |
| 4508 | IPI00662861.1 | LOC635087    | 1.50 | -    | - | -       |
| 4509 | IPI00117832.1 | Lym7         | 1.50 | 1.14 | - | -       |
| 4510 | IPI00227191.1 | Rhof         | 1.50 | -    | - | -       |
| 4511 | IPI00125971.1 | Psmc6        | 1.50 | 0.85 | - | 0.77333 |
| 4512 | IPI00858156.1 | Oxct1        | 1.50 | -    | - | -       |
| 4513 | IPI00755161.2 | Osbp         | 1.50 | -    | - | -       |
| 4514 | IPI00280252.1 | Ipo11        | 1.50 | -    | - | -       |
| 4515 | IPI00355368.4 | Ipo11        | 1.50 | -    | - | -       |
| 4516 | IPI00395042.1 | Nrcam        | 1.51 | 1.00 | - | -       |
| 4517 | IPI00403536.1 | Nrcam        | 1.51 | -    | - | -       |
| 4518 | IPI00928498.1 | Dnajb12      | 1.51 | -    | - | -       |
| 4519 | IPI00331598.2 | Dnajb12      | 1.51 | -    | - | -       |
| 4520 | IPI00928538.1 | Dnajb12      | 1.51 | -    | - | -       |
| 4521 | IPI00130253.4 | Cacna2d3     | 1.51 | 0.90 | - | 0.66357 |

|      |                         |          |      |      |   |         |
|------|-------------------------|----------|------|------|---|---------|
| 4522 | IPI00830364.1           | Htra2    | 1.51 | -    | - | -       |
| 4523 | IPI00830249.1           | Htra2    | 1.51 | -    | - | -       |
| 4524 | IPI00127871.1           | Syt7     | 1.51 | -    | - | -       |
| 4525 | IPI00400053.1           | Syt7     | 1.51 | 0.85 | - | 0.53945 |
| 4526 | IPI00762862.3           | Grm2     | 1.51 | 0.89 | - | 0.76165 |
| 4527 | IPI00775849.2           | Actn4    | 1.52 | 1.04 | - | -       |
| 4528 | IPI00830834.2           | Homer1   | 1.52 | -    | - | -       |
| 4529 | IPI00653231.1           | Sfxn3    | 1.52 | -    | - | -       |
| 4530 | IPI00310907.5           | Spon1    | 1.52 | 0.97 | - | -       |
| 4531 | IPI00381563.4           | Cytsb    | 1.52 | 0.53 | - | -       |
| 4532 | IPI00798550.1           | Cytsb    | 1.52 | 0.86 | - | 0.67004 |
| 4533 | IPI00761331.2           | 3-Sep    | 1.52 | -    | - | -       |
| 4534 | contaminant_UBIQUITIN10 |          | 1.53 | -    | - | -       |
| 4535 | IPI00229810.4           | Plekha5  | 1.53 | 0.90 | - | -       |
| 4536 | IPI00127596.1           | Ckm      | 1.53 | 0.97 | - | 0.90191 |
| 4537 | IPI00120943.3           | Cnmn1    | 1.53 | 0.83 | - | 0.91929 |
| 4538 | IPI00330176.4           | Mon2     | 1.53 | 1.10 | - | -       |
| 4539 | IPI00649206.3           | Sgip1    | 1.54 | -    | - | -       |
| 4540 | IPI00648975.1           | Sgip1    | 1.54 | -    | - | -       |
| 4541 | IPI00648333.1           | Gstm4    | 1.55 | -    | - | -       |
| 4542 | IPI00619992.2           | Gm6665   | 1.55 | -    | - | -       |
| 4543 | IPI00121280.5           | Gstm7    | 1.55 | 0.90 | - | -       |
| 4544 | IPI00165796.1           | Gstm4    | 1.55 | -    | - | -       |
| 4545 | IPI00648589.1           | Gstm7    | 1.55 | -    | - | -       |
| 4546 | IPI00750485.1           | -        | 1.55 | -    | - | -       |
| 4547 | IPI00648675.1           | Gstm6    | 1.55 | -    | - | -       |
| 4548 | IPI00228820.5           | Gstm2    | 1.55 | -    | - | -       |
| 4549 | IPI00648064.1           | Gstm7    | 1.55 | 0.71 | - | -       |
| 4550 | IPI00648817.3           | Gstm7    | 1.55 | -    | - | -       |
| 4551 | IPI00648336.1           | Gstm2    | 1.55 | -    | - | -       |
| 4552 | IPI00622497.3           | Cyfip2   | 1.55 | -    | - | -       |
| 4553 | IPI00653348.1           | Rgs6     | 1.56 | -    | - | -       |
| 4554 | IPI00648884.1           | Mecr     | 1.56 | -    | - | -       |
| 4555 | IPI00116308.1           | St13     | 1.56 | 0.97 | - | 0.91639 |
| 4556 | IPI00459443.5           | Tnks1bp1 | 1.56 | 0.65 | - | -       |
| 4557 | IPI00855061.2           | Lrfn1    | 1.56 | -    | - | -       |
| 4558 | IPI00895406.1           | Lrfn1    | 1.56 | -    | - | -       |
| 4559 | IPI00221663.5           | Bpgm     | 1.56 | 0.94 | - | 0.63837 |
| 4560 | IPI00886212.1           | Osbp1a   | 1.57 | -    | - | -       |
| 4561 | IPI00118654.2           | Pdpx     | 1.57 | 1.13 | - | 0.5342  |
| 4562 | IPI00828758.2           | Apool    | 1.57 | -    | - | -       |
| 4563 | IPI00874376.1           | Apool    | 1.57 | 1.10 | - | 0.78297 |
| 4564 | IPI00112493.2           | Apool    | 1.57 | 1.27 | - | -       |
| 4565 | IPI00111885.1           | Uqcrc1   | 1.57 | -    | - | -       |
| 4566 | IPI00317701.2           | Cops7a   | 1.57 | 0.96 | - | 0.83335 |
| 4567 | IPI00123465.1           | Cops7a   | 1.57 | -    | - | -       |
| 4568 | IPI00753794.1           | Sec24b   | 1.57 | -    | - | -       |
| 4569 | IPI00875638.1           | Immt     | 1.58 | -    | - | -       |
| 4570 | IPI00648472.1           | Epn2     | 1.58 | -    | - | -       |
| 4571 | IPI00875016.1           | Slc25a18 | 1.59 | -    | - | -       |
| 4572 | IPI00344640.4           | Slc25a18 | 1.59 | -    | - | -       |
| 4573 | IPI00817038.1           | Slc25a18 | 1.59 | 0.80 | - | 0.69855 |



|      |                |              |      |      |   |         |
|------|----------------|--------------|------|------|---|---------|
| 4574 | IPI00308001.1  | Oxa1l        | 1.59 | 1.36 | - | 0.45615 |
| 4575 | IPI00653617.1  | Snap91       | 1.59 | -    | - | -       |
| 4576 | IPI00460042.4  | Ralgapa1     | 1.59 | 1.07 | - | 0.88143 |
| 4577 | IPI00315452.5  | Pnp1         | 1.60 | -    | - | -       |
| 4578 | IPI00875288.1  | Pnp2         | 1.60 | -    | - | -       |
| 4579 | IPI00607023.1  | Pnp1         | 1.60 | 1.07 | - | 0.84785 |
| 4580 | IPI00751493.2  | Pnp1         | 1.60 | -    | - | -       |
| 4581 | IPI00468039.1  | Pnp2         | 1.60 | -    | - | -       |
| 4582 | IPI00830989.1  | Homer1       | 1.60 | -    | - | -       |
| 4583 | IPI00230719.8  | Braf         | 1.60 | 2.25 | - | 0.68765 |
| 4584 | IPI00857249.1  | Clstn3       | 1.60 | 0.76 | - | 0.3547  |
| 4585 | IPI00115312.1  | Clstn3       | 1.60 | -    | - | -       |
| 4586 | IPI00885599.1  | N28178       | 1.60 | -    | - | -       |
| 4587 | IPI00881534.1  | Ppa2         | 1.61 | -    | - | -       |
| 4588 | IPI00127050.1  | Ppa2         | 1.61 | 1.02 | - | 0.8586  |
| 4589 | IPI00658313.2  | Kidins220    | 1.61 | 0.95 | - | 0.83406 |
| 4590 | IPI00624420.5  | Kidins220    | 1.61 | -    | - | -       |
| 4591 | IPI00655029.1  | Sorbs1       | 1.61 | -    | - | -       |
| 4592 | IPI00128261.1  | mt-Cytb      | 1.61 | 1.11 | - | 0.59994 |
| 4593 | IPI00114710.3  | Pcx          | 1.61 | -    | - | -       |
| 4594 | IPI00405343.1  | Csnk1g2      | 1.62 | -    | - | -       |
| 4595 | IPI00115591.1  | Csnk1g2      | 1.62 | -    | - | -       |
| 4596 | IPI00788396.1  | Clpx         | 1.62 | 1.63 | - | 0.35843 |
| 4597 | IPI00323479.2  | Lrrc57       | 1.63 | -    | - | -       |
| 4598 | IPI00875390.1  | Lrrc57       | 1.63 | -    | - | -       |
| 4599 | IPI00929831.1  | Lrrc57       | 1.63 | -    | - | -       |
| 4600 | IPI00623216.2  | Lrrc57       | 1.63 | 1.09 | - | 0.63928 |
| 4601 | IPI00856855.1  | Crat         | 1.63 | -    | - | -       |
| 4602 | IPI00855075.3  | Mrps9        | 1.63 | 1.07 | - | 0.81665 |
| 4603 | IPI00336292.2  | Mrps9        | 1.63 | -    | - | -       |
| 4604 | IPI00874889.1  | Mtx2         | 1.63 | -    | - | -       |
| 4605 | IPI00330476.3  | Cyfip1       | 1.63 | 0.95 | - | 0.81665 |
| 4606 | IPI00403332.2  | Gga3         | 1.63 | -    | - | -       |
| 4607 | IPI00649581.1  | Gga3         | 1.63 | 0.72 | - | 0.71518 |
| 4608 | IPI00798610.1  | Gga3         | 1.63 | -    | - | -       |
| 4609 | IPI00648743.1  | Ndufb6       | 1.64 | -    | - | -       |
| 4610 | IPI00109904.3  | Galc         | 1.64 | 1.26 | - | 0.48497 |
| 4611 | IPI00469217.2  | Pld2         | 1.64 | -    | - | -       |
| 4612 | IPI00831445.1  | Pld2         | 1.64 | -    | - | -       |
| 4613 | IPI00320847.10 | Hsd17b10     | 1.64 | -    | - | -       |
| 4614 | IPI00132812.3  | Prr7         | 1.64 | 0.92 | - | 0.83105 |
| 4615 | IPI00135561.3  | Fam131b      | 1.65 | -    | - | -       |
| 4616 | IPI00762777.4  | Fam131b      | 1.65 | -    | - | -       |
| 4617 | IPI00928579.1  | Fam131b      | 1.65 | 1.54 | - | 0.47039 |
| 4618 | IPI00111166.7  | Hdhd2        | 1.65 | 1.07 | - | -       |
| 4619 | IPI00623838.3  | Bphl         | 1.65 | -    | - | -       |
| 4620 | IPI00465959.1  | Pde4b        | 1.65 | -    | - | -       |
| 4621 | IPI00515222.1  | Bcas3        | 1.66 | 0.40 | - | 0.73241 |
| 4622 | IPI00336713.1  | Bcas3        | 1.66 | -    | - | -       |
| 4623 | IPI00874431.2  | Bcas3        | 1.66 | -    | - | -       |
| 4624 | IPI00116734.3  | Rab23        | 1.66 | -    | - | -       |
| 4625 | IPI00404235.2  | LOC100047867 | 1.66 | 0.91 | - | 0.6116  |

|      |               |              |      |      |   |         |
|------|---------------|--------------|------|------|---|---------|
| 4626 | IPI00856424.1 | Atp5j        | 1.67 | -    | - | -       |
| 4627 | IPI00676449.2 | Pcdh9        | 1.67 | -    | - | -       |
| 4628 | IPI00350715.5 | Pcdh9        | 1.67 | -    | - | -       |
| 4629 | IPI00420882.3 | Ogdh         | 1.67 | 1.07 | - | 0.47364 |
| 4630 | IPI00474370.5 | Rhot2        | 1.67 | 1.10 | - | 0.65088 |
| 4631 | IPI00623400.3 | Slmap        | 1.67 | -    | - | -       |
| 4632 | IPI00652644.1 | Slmap        | 1.67 | -    | - | -       |
| 4633 | IPI00755791.4 | Slmap        | 1.67 | -    | - | -       |
| 4634 | IPI00830193.1 | Slmap        | 1.67 | -    | - | -       |
| 4635 | IPI00624363.4 | Slmap        | 1.67 | 0.91 | - | 0.77388 |
| 4636 | IPI00876282.1 | Slmap        | 1.67 | -    | - | -       |
| 4637 | IPI00855011.1 | LOC100046998 | 1.67 | -    | - | -       |
| 4638 | IPI00944020.1 | Baiap3       | 1.67 | -    | - | -       |
| 4639 | IPI00830376.1 | Slmap        | 1.67 | -    | - | -       |
| 4640 | IPI00623742.1 | Pde2a        | 1.67 | 0.90 | - | -       |
| 4641 | IPI00380799.5 | Pde2a        | 1.67 | -    | - | -       |
| 4642 | IPI00928387.1 | Ndufv1       | 1.68 | -    | - | -       |
| 4643 | IPI00223070.3 | Dock4        | 1.68 | 0.83 | - | 0.51296 |
| 4644 | IPI00135640.1 | Psmc5        | 1.69 | 0.94 | - | -       |
| 4645 | IPI00462789.1 | Psmc5        | 1.69 | 0.98 | - | -       |
| 4646 | IPI00136498.1 | Lin7c        | 1.69 | 0.27 | - | -       |
| 4647 | IPI00515583.1 | Tom112       | 1.69 | -    | - | -       |
| 4648 | IPI00331692.1 | Dci          | 1.69 | 0.93 | - | 0.75904 |
| 4649 | IPI00845652.1 | Ogdh         | 1.70 | 1.13 | - | 0.31297 |
| 4650 | IPI00653024.3 | Gnb5         | 1.70 | -    | - | -       |
| 4651 | IPI00222696.2 | Dtna         | 1.70 | -    | - | -       |
| 4652 | IPI00755441.1 | Dtna         | 1.70 | -    | - | -       |
| 4653 | IPI00135042.1 | Dtna         | 1.70 | -    | - | -       |
| 4654 | IPI00222694.6 | Dtna         | 1.70 | 1.06 | - | -       |
| 4655 | IPI00466606.3 | Dtna         | 1.70 | -    | - | -       |
| 4656 | IPI00410809.3 | Dtna         | 1.70 | -    | - | -       |
| 4657 | IPI00222693.1 | Dtna         | 1.70 | -    | - | -       |
| 4658 | IPI00222692.1 | Dtna         | 1.70 | -    | - | -       |
| 4659 | IPI00128989.1 | Atp6ap1      | 1.70 | 1.03 | - | 0.9364  |
| 4660 | IPI00349033.1 | Asap1        | 1.71 | -    | - | -       |
| 4661 | IPI00349032.2 | Asap1        | 1.71 | 1.07 | - | 0.74499 |
| 4662 | IPI00874740.1 | Asap1        | 1.71 | -    | - | -       |
| 4663 | IPI00134544.3 | Asap1        | 1.71 | -    | - | -       |
| 4664 | IPI00849638.1 | LOC100045359 | 1.71 | -    | - | -       |
| 4665 | IPI00785215.1 | Sgip1        | 1.71 | -    | - | -       |
| 4666 | IPI00311247.6 | Sgip1        | 1.71 | -    | - | -       |
| 4667 | IPI00930824.1 | Folh1        | 1.71 | -    | - | -       |
| 4668 | IPI00626793.3 | Cacna2d1     | 1.71 | -    | - | -       |
| 4669 | IPI00230013.3 | Cacna2d1     | 1.71 | -    | - | -       |
| 4670 | IPI00895213.1 | Gabrb3       | 1.71 | -    | - | -       |
| 4671 | IPI00323554.3 | Gabrb2       | 1.71 | -    | - | -       |
| 4672 | IPI00469761.6 | Crtc1        | 1.71 | -    | - | -       |
| 4673 | IPI00877206.1 | Fmn2         | 1.71 | 0.82 | - | 0.49522 |
| 4674 | IPI00134371.1 | Ddx3y        | 1.71 | 1.10 | - | 0.45615 |
| 4675 | IPI00848511.1 | LOC100045908 | 1.72 | -    | - | -       |
| 4676 | IPI00874964.3 | -            | 1.72 | -    | - | -       |
| 4677 | IPI00110760.1 | Dnajb4       | 1.72 | 0.99 | - | 0.99268 |

|      |               |               |      |      |   |         |
|------|---------------|---------------|------|------|---|---------|
| 4678 | IPI00172027.4 | Mkl2          | 1.72 | -    | - | -       |
| 4679 | IPI00858150.1 | Mkl2          | 1.72 | 1.27 | - | -       |
| 4680 | IPI00404363.1 | Acox3         | 1.72 | 0.79 | - | 0.69126 |
| 4681 | IPI00857891.1 | Acox3         | 1.72 | -    | - | -       |
| 4682 | IPI00318108.2 | Acox3         | 1.72 | -    | - | -       |
| 4683 | IPI00921638.1 | Ppfia4        | 1.73 | 0.97 | - | 0.93074 |
| 4684 | IPI00882124.1 | Rogdi         | 1.73 | -    | - | -       |
| 4685 | IPI00858277.1 | Nlgn4l        | 1.73 | 0.64 | - | -       |
| 4686 | IPI00308882.4 | Ndufs1        | 1.73 | -    | - | -       |
| 4687 | IPI00223274.2 | Inpp5a        | 1.73 | -    | - | -       |
| 4688 | IPI00856931.1 | Inpp5a        | 1.73 | 1.06 | - | 0.47039 |
| 4689 | IPI00649725.1 | Cisd3         | 1.73 | -    | - | -       |
| 4690 | IPI00345740.4 | Cisd3         | 1.73 | -    | - | -       |
| 4691 | IPI00649328.1 | Cisd3         | 1.73 | 0.94 | - | 0.76539 |
| 4692 | IPI00312128.3 | Trim28        | 1.73 | -    | - | -       |
| 4693 | IPI00172221.2 | Dnm1l         | 1.74 | -    | - | -       |
| 4694 | IPI00651854.2 | Txn2          | 1.74 | -    | - | -       |
| 4695 | IPI00828588.2 | Txn2          | 1.74 | -    | - | -       |
| 4696 | IPI00125652.1 | Txn2          | 1.74 | 1.18 | - | 0.56724 |
| 4697 | IPI00228324.1 | Mfsd6         | 1.75 | -    | - | -       |
| 4698 | IPI00262303.2 | Mfsd6         | 1.75 | 0.37 | - | 0.33373 |
| 4699 | IPI00228877.1 | Cnksr2        | 1.75 | -    | - | -       |
| 4700 | IPI00831624.1 | Cnksr2        | 1.75 | -    | - | -       |
| 4701 | IPI00665996.3 | Suclg2        | 1.75 | 0.53 | - | -       |
| 4702 | IPI00459487.3 | Suclg2        | 1.75 | -    | - | -       |
| 4703 | IPI00647997.1 | Pde4b         | 1.75 | 1.76 | - | -       |
| 4704 | IPI00276327.4 | Pde4b         | 1.75 | -    | - | -       |
| 4705 | IPI00649715.1 | Pde4b         | 1.75 | -    | - | -       |
| 4706 | IPI00172234.3 | Homer1        | 1.75 | -    | - | -       |
| 4707 | IPI00282945.1 | Homer1        | 1.75 | -    | - | -       |
| 4708 | IPI00918511.1 | Psat1         | 1.75 | -    | - | -       |
| 4709 | IPI00918735.1 | Psat1         | 1.75 | -    | - | -       |
| 4710 | IPI00655222.1 | Smap2         | 1.76 | 1.24 | - | 0.35843 |
| 4711 | IPI00756510.1 | Smap2         | 1.76 | 1.13 | - | 0.49057 |
| 4712 | IPI00874574.1 | Clybl         | 1.76 | 0.97 | - | 0.87475 |
| 4713 | IPI00153903.6 | Clybl         | 1.76 | -    | - | -       |
| 4714 | IPI00133368.1 | Myo6          | 1.77 | -    | - | -       |
| 4715 | IPI00321942.4 | Arfp2         | 1.77 | 0.86 | - | 0.72832 |
| 4716 | IPI00894767.1 | D230025D16Rik | 1.77 | -    | - | -       |
| 4717 | IPI00894592.1 | D230025D16Rik | 1.77 | -    | - | -       |
| 4718 | IPI00123927.1 | Serpina1e     | 1.78 | -    | - | -       |
| 4719 | IPI00123920.2 | Serpina1c     | 1.78 | -    | - | -       |
| 4720 | IPI00406302.2 | Serpina1a     | 1.78 | 1.09 | - | 0.88182 |
| 4721 | IPI00123924.1 | Serpina1d     | 1.78 | -    | - | -       |
| 4722 | IPI00903401.1 | Serpina1c     | 1.78 | -    | - | -       |
| 4723 | IPI00757547.1 | Phactr1       | 1.78 | -    | - | -       |
| 4724 | IPI00719908.1 | Phactr1       | 1.78 | 0.83 | - | 0.35616 |
| 4725 | IPI00749720.1 | Rab3gap1      | 1.79 | 1.16 | - | 0.65135 |
| 4726 | IPI00469255.4 | Rab3gap1      | 1.79 | 1.08 | - | -       |
| 4727 | IPI00404052.3 | Mpdz          | 1.79 | -    | - | -       |
| 4728 | IPI00608031.1 | Mpdz          | 1.79 | -    | - | -       |
| 4729 | IPI00474705.2 | Mpdz          | 1.79 | -    | - | -       |

|      |               |                |      |      |   |         |
|------|---------------|----------------|------|------|---|---------|
| 4730 | IPI00457729.1 | Mpdz           | 1.79 | -    | - | -       |
| 4731 | IPI00876426.2 | Mpdz           | 1.79 | -    | - | -       |
| 4732 | IPI00466594.2 | Mpdz           | 1.79 | -    | - | -       |
| 4733 | IPI00876536.1 | Acss2          | 1.80 | -    | - | -       |
| 4734 | IPI00752027.1 | Myh7b;Acss2    | 1.80 | 0.86 | - | 0.54013 |
| 4735 | IPI00227288.1 | Elfn1          | 1.81 | 0.86 | - | -       |
| 4736 | IPI00119432.1 | Smpd2          | 1.81 | 0.28 | - | 0.67208 |
| 4737 | IPI00377728.2 | Tomm70a        | 1.81 | 1.03 | - | 0.90591 |
| 4738 | IPI00468602.3 | Lrfn1          | 1.83 | -    | - | -       |
| 4739 | IPI00918939.1 | Brp44l         | 1.83 | -    | - | -       |
| 4740 | IPI00475058.2 | Brp44l         | 1.83 | -    | - | -       |
| 4741 | IPI00918855.1 | Brp44l         | 1.83 | -    | - | -       |
| 4742 | IPI00380983.3 | Mrs2           | 1.85 | 1.09 | - | 0.53529 |
| 4743 | IPI00850779.1 | Gm2606         | 1.85 | -    | - | -       |
| 4744 | IPI00273646.9 | Gm10293;Gapdh; | 1.85 | 0.88 | - | -       |
| 4745 | IPI00755909.1 | LOC100047237   | 1.85 | -    | - | -       |
| 4746 | IPI00875027.1 | Xpnpep1        | 1.86 | 0.96 | - | 0.83335 |
| 4747 | IPI00420231.4 | Xpnpep1        | 1.86 | -    | - | -       |
| 4748 | IPI00421140.2 | Gm1568         | 1.86 | 0.99 | - | 0.94277 |
| 4749 | IPI00132965.1 | Ppp6c          | 1.86 | 1.15 | - | 0.81108 |
| 4750 | IPI00876154.1 | Lphn2          | 1.86 | -    | - | -       |
| 4751 | IPI00876558.1 | Lphn2          | 1.86 | 1.73 | - | 0.37683 |
| 4752 | IPI00668099.3 | Lphn2          | 1.86 | -    | - | -       |
| 4753 | IPI00761433.2 | Rims1          | 1.86 | -    | - | -       |
| 4754 | IPI00620145.1 | Kars           | 1.87 | 0.91 | - | 0.7843  |
| 4755 | IPI00469103.1 | Kars           | 1.87 | -    | - | -       |
| 4756 | IPI00666196.1 | LOC631033      | 1.87 | -    | - | -       |
| 4757 | IPI00123589.1 | Ubxn1          | 1.88 | -    | - | -       |
| 4758 | IPI00890100.1 | Dnajb2         | 1.88 | -    | - | -       |
| 4759 | IPI00136216.2 | Dnajb2         | 1.88 | -    | - | -       |
| 4760 | IPI00223482.2 | Dnajb2         | 1.88 | 0.89 | - | 0.63502 |
| 4761 | IPI00857589.1 | Cadps2         | 1.88 | -    | - | -       |
| 4762 | IPI00856908.1 | Cadps2         | 1.88 | -    | - | -       |
| 4763 | IPI00678914.1 | Cadps2         | 1.88 | -    | - | -       |
| 4764 | IPI00227236.2 | Cadps2         | 1.88 | -    | - | -       |
| 4765 | IPI00404043.3 | Cadps2         | 1.88 | 0.91 | - | 0.50817 |
| 4766 | IPI00626585.2 | Cadps2         | 1.88 | -    | - | -       |
| 4767 | IPI00857071.1 | Cadps2         | 1.88 | -    | - | -       |
| 4768 | IPI00679051.1 | Cadps2         | 1.88 | -    | - | -       |
| 4769 | IPI00129964.1 | Hax1           | 1.89 | 1.31 | - | -       |
| 4770 | IPI00128341.1 | Wasf3          | 1.89 | 0.96 | - | 0.88667 |
| 4771 | IPI00226234.5 | Plaa           | 1.89 | -    | - | -       |
| 4772 | IPI00828952.1 | Plaa           | 1.89 | -    | - | -       |
| 4773 | IPI00125992.1 | Nptx1          | 1.89 | 0.99 | - | 0.9364  |
| 4774 | IPI00119283.1 | Gabrb1         | 1.89 | 0.52 | - | 0.70614 |
| 4775 | IPI00828430.1 | Cdkl5          | 1.89 | 0.78 | - | -       |
| 4776 | IPI00337001.1 | Lgi2           | 1.90 | 0.92 | - | 0.84674 |
| 4777 | IPI00857213.1 | Asphd1         | 1.90 | 1.04 | - | -       |
| 4778 | IPI00467229.2 | Faim2          | 1.91 | 0.76 | - | 0.49522 |
| 4779 | IPI00621963.2 | Rab23          | 1.91 | 0.99 | - | 0.98022 |
| 4780 | IPI00313306.5 | Ptpn           | 1.91 | 0.91 | - | 0.79634 |
| 4781 | IPI00649259.1 | Hgs            | 1.91 | -    | - | -       |

|      |               |                 |      |      |   |         |
|------|---------------|-----------------|------|------|---|---------|
| 4782 | IPI00755229.3 | Caskin1         | 1.91 | -    | - | -       |
| 4783 | IPI00331251.1 | Acads           | 1.92 | 1.10 | - | 0.8044  |
| 4784 | IPI00116591.1 | Acads           | 1.92 | -    | - | -       |
| 4785 | IPI00407606.1 | Ephx2           | 1.92 | 1.01 | - | -       |
| 4786 | IPI00321617.1 | Ephx2           | 1.92 | 0.82 | - | -       |
| 4787 | IPI00131424.3 | Cpt2            | 1.92 | -    | - | -       |
| 4788 | IPI00881401.1 | Cpt2            | 1.92 | 1.11 | - | 0.72047 |
| 4789 | IPI00420710.1 | Galnt2          | 1.92 | -    | - | -       |
| 4790 | IPI00460865.1 | Galnt2          | 1.92 | 1.34 | - | -       |
| 4791 | IPI00653724.1 | Galnt2          | 1.92 | -    | - | -       |
| 4792 | IPI00652728.1 | Slc14a1         | 1.93 | 0.92 | - | -       |
| 4793 | IPI00420812.2 | Slc14a1         | 1.93 | -    | - | -       |
| 4794 | IPI00649904.3 | Sdcbp           | 1.93 | -    | - | -       |
| 4795 | IPI00647998.3 | Sdcbp           | 1.93 | -    | - | -       |
| 4796 | IPI00553593.1 | Tnr             | 1.93 | -    | - | -       |
| 4797 | IPI00880403.1 | Tmem30a         | 1.95 | 1.02 | - | 0.96924 |
| 4798 | IPI00387318.3 | Tmem30a         | 1.95 | -    | - | -       |
| 4799 | IPI00918668.1 | Gtf3c2;Ucn      | 1.96 | -    | - | -       |
| 4800 | IPI00114263.1 | Gtf3c2;Ucn;Mpv1 | 1.96 | -    | - | -       |
| 4801 | IPI00271835.2 | Rdx             | 1.96 | -    | - | -       |
| 4802 | IPI00308324.2 | Rdx             | 1.96 | 1.12 | - | -       |
| 4803 | IPI00123176.1 | -               | 1.96 | -    | - | -       |
| 4804 | IPI00675985.1 | Kctd16          | 1.96 | 0.83 | - | 0.62171 |
| 4805 | IPI00469830.4 | Gucy1a2         | 1.97 | -    | - | -       |
| 4806 | IPI00118499.1 | Uchl4           | 1.97 | -    | - | -       |
| 4807 | IPI00622795.2 | Gm3839          | 1.98 | 0.84 | - | -       |
| 4808 | IPI00853668.2 | Gm10284         | 1.98 | -    | - | -       |
| 4809 | IPI00674768.3 | Stxbp5          | 1.98 | 0.92 | - | 0.39388 |
| 4810 | IPI00123006.4 | Gmppa           | 1.99 | -    | - | -       |
| 4811 | IPI00761856.2 | Gmppa           | 1.99 | -    | - | -       |
| 4812 | IPI00310333.1 | Sphk2           | 1.99 | 0.94 | - | -       |
| 4813 | IPI00349296.6 | Tanc1           | 2.00 | -    | - | -       |
| 4814 | IPI00753174.1 | Tanc1           | 2.00 | -    | - | -       |
| 4815 | IPI00309636.2 | Tanc1           | 2.00 | -    | - | -       |
| 4816 | IPI00889252.1 | Cbara1          | 2.00 | -    | - | -       |
| 4817 | IPI00378017.1 | Gnb5            | 2.00 | 0.78 | - | 0.38642 |
| 4818 | IPI00308813.1 | Cbara1          | 2.00 | -    | - | -       |
| 4819 | IPI00127930.1 | Gnb5            | 2.00 | -    | - | -       |
| 4820 | IPI00622279.1 | Cbara1          | 2.00 | 1.01 | - | 0.93022 |
| 4821 | IPI00849678.1 | LOC100046972    | 2.01 | -    | - | -       |
| 4822 | IPI00750364.1 | Msi1            | 2.01 | -    | - | -       |
| 4823 | IPI00121300.1 | Msi1            | 2.01 | -    | - | -       |
| 4824 | IPI00808494.1 | Eea1            | 2.02 | -    | - | -       |
| 4825 | IPI00453776.1 | Eea1            | 2.02 | 1.25 | - | 0.35616 |
| 4826 | IPI00310567.2 | Pon2            | 2.02 | 1.07 | - | 0.78265 |
| 4827 | IPI00118167.1 | Cecr6           | 2.03 | 0.85 | - | 0.37683 |
| 4828 | IPI00858144.1 | Camk2d          | 2.03 | -    | - | -       |
| 4829 | IPI00857865.1 | Camk2d          | 2.03 | -    | - | -       |
| 4830 | IPI00475044.3 | Camk2d          | 2.03 | -    | - | -       |
| 4831 | IPI00853802.1 | Rock2           | 2.04 | 0.87 | - | 0.63467 |
| 4832 | IPI00108150.1 | Rock2           | 2.04 | -    | - | -       |
| 4833 | IPI00133744.1 | Ndufaf4         | 2.04 | 0.90 | - | 0.74798 |

|      |               |               |      |      |   |         |
|------|---------------|---------------|------|------|---|---------|
| 4834 | IPI00123321.1 | D230025D16Rik | 2.05 | -    | - | -       |
| 4835 | IPI00850427.1 | Gm4943        | 2.06 | -    | - | -       |
| 4836 | IPI00816839.1 | Sae1          | 2.06 | 1.09 | - | -       |
| 4837 | IPI00129105.2 | Sae1          | 2.06 | -    | - | -       |
| 4838 | IPI00554862.2 | Pfkl          | 2.07 | -    | - | -       |
| 4839 | IPI00889985.1 | D230025D16Rik | 2.07 | 0.89 | - | 0.51132 |
| 4840 | IPI00556823.3 | Prkaa1        | 2.07 | 0.97 | - | 0.7895  |
| 4841 | IPI00338412.1 | Fgf12         | 2.07 | 1.00 | - | 0.97749 |
| 4842 | IPI00130399.1 | Fgf12         | 2.07 | -    | - | -       |
| 4843 | IPI00894694.1 | Clic4         | 2.08 | 0.78 | - | 0.73026 |
| 4844 | IPI00620663.3 | LOC100042025  | 2.09 | -    | - | -       |
| 4845 | IPI00849879.1 | Gm3222        | 2.09 | -    | - | -       |
| 4846 | IPI00850028.1 | Gm2606        | 2.09 | -    | - | -       |
| 4847 | IPI00849049.1 | Gm10284       | 2.09 | -    | - | -       |
| 4848 | IPI00120076.2 | Ckmt2         | 2.09 | -    | - | -       |
| 4849 | IPI00858177.1 | Phactr1       | 2.09 | -    | - | -       |
| 4850 | IPI00471281.3 | Phactr1       | 2.09 | -    | - | -       |
| 4851 | IPI00876153.1 | Phactr1       | 2.09 | -    | - | -       |
| 4852 | IPI00454161.5 | Ralgapa1      | 2.10 | -    | - | -       |
| 4853 | IPI00379694.4 | Hmgcl         | 2.10 | 1.05 | - | 0.77388 |
| 4854 | IPI00313539.4 | Scai          | 2.11 | 0.94 | - | 0.78094 |
| 4855 | IPI00404924.3 | Dgkg          | 2.11 | 0.83 | - | -       |
| 4856 | IPI00128127.1 | Dgkg          | 2.11 | -    | - | -       |
| 4857 | IPI00762688.2 | Nptn          | 2.11 | -    | - | -       |
| 4858 | IPI00227970.1 | Exoc7         | 2.12 | -    | - | -       |
| 4859 | IPI00848775.1 | Gm16470       | 2.13 | -    | - | -       |
| 4860 | IPI00462605.5 | Gm16470       | 2.13 | -    | - | -       |
| 4861 | IPI00880371.1 | Lass2         | 2.13 | -    | - | -       |
| 4862 | IPI00880251.1 | Lass2         | 2.13 | 0.95 | - | -       |
| 4863 | IPI00126253.1 | Lass2         | 2.13 | 0.93 | - | -       |
| 4864 | IPI00882182.1 | Lass2         | 2.13 | -    | - | -       |
| 4865 | IPI00928217.1 | Otub1         | 2.14 | -    | - | -       |
| 4866 | IPI00228045.1 | Camk2g        | 2.14 | -    | - | -       |
| 4867 | IPI00750847.2 | Rtn3          | 2.15 | -    | - | -       |
| 4868 | IPI00755859.1 | Sv2c          | 2.18 | 0.68 | - | 0.62137 |
| 4869 | IPI00468140.2 | Sorbs1        | 2.18 | -    | - | -       |
| 4870 | IPI00755042.1 | Tmem132b      | 2.20 | 0.98 | - | 0.97801 |
| 4871 | IPI00123004.3 | Pdk3          | 2.23 | 0.96 | - | 0.83335 |
| 4872 | IPI00408626.4 | Tpd52         | 2.25 | -    | - | -       |
| 4873 | IPI00473743.5 | Tpd52         | 2.25 | -    | - | -       |
| 4874 | IPI00881225.1 | Tpd52         | 2.25 | -    | - | -       |
| 4875 | IPI00622606.1 | Tpd52         | 2.25 | -    | - | -       |
| 4876 | IPI00882249.1 | Tpd52         | 2.25 | -    | - | -       |
| 4877 | IPI00830558.1 | Bpnt1         | 2.26 | 1.12 | - | 0.73026 |
| 4878 | IPI00318545.3 | Bpnt1         | 2.26 | -    | - | -       |
| 4879 | IPI00379467.4 | Adam22        | 2.26 | -    | - | -       |
| 4880 | IPI00378796.5 | Adam22        | 2.26 | -    | - | -       |
| 4881 | IPI00754961.1 | Adam22        | 2.26 | -    | - | -       |
| 4882 | IPI00623219.2 | Adam22        | 2.26 | -    | - | -       |
| 4883 | IPI00752301.1 | Adam22        | 2.26 | -    | - | -       |
| 4884 | IPI00753532.1 | Adam22        | 2.26 | -    | - | -       |
| 4885 | IPI00515681.2 | Adam22        | 2.26 | -    | - | -       |

|      |               |              |      |      |   |         |
|------|---------------|--------------|------|------|---|---------|
| 4886 | IPI00627016.2 | Adam22       | 2.26 | -    | - | -       |
| 4887 | IPI00122831.5 | Exoc6        | 2.26 | -    | - | -       |
| 4888 | IPI00753681.1 | Exoc6        | 2.26 | 1.07 | - | -       |
| 4889 | IPI00321446.4 | Prkca        | 2.27 | -    | - | -       |
| 4890 | IPI00918604.1 | Mfsd6        | 2.27 | 0.64 | - | 0.73565 |
| 4891 | IPI00648089.1 | Irgm1        | 2.29 | 0.86 | - | -       |
| 4892 | IPI00889294.1 | Irgm1        | 2.29 | -    | - | -       |
| 4893 | IPI00120264.1 | Irgm1        | 2.29 | -    | - | -       |
| 4894 | IPI00113112.3 | Rab3b        | 2.29 | 0.92 | - | 0.67796 |
| 4895 | IPI00113278.1 | Kcnj9        | 2.29 | -    | - | -       |
| 4896 | IPI00895490.1 | Dctn6        | 2.29 | -    | - | -       |
| 4897 | IPI00895320.1 | Dctn6        | 2.29 | 0.78 | - | 0.78676 |
| 4898 | IPI00458698.2 | Dctn6        | 2.29 | -    | - | -       |
| 4899 | IPI00265299.3 | Atp2b3       | 2.31 | 0.78 | - | -       |
| 4900 | IPI00621162.2 | Atp2b3       | 2.31 | 0.72 | - | 0.37995 |
| 4901 | IPI00830728.1 | Iqsec2       | 2.31 | 0.78 | - | -       |
| 4902 | IPI00874754.1 | Kcnip4       | 2.32 | -    | - | -       |
| 4903 | IPI00875649.1 | Kcnip4       | 2.32 | -    | - | -       |
| 4904 | IPI00621710.2 | Kcnip4       | 2.32 | 1.13 | - | -       |
| 4905 | IPI00454000.3 | Kcnip4       | 2.32 | -    | - | -       |
| 4906 | IPI00653226.1 | Kcnip4       | 2.32 | -    | - | -       |
| 4907 | IPI00648557.1 | Kcnip4       | 2.32 | -    | - | -       |
| 4908 | IPI00749893.3 | Exoc5        | 2.33 | -    | - | -       |
| 4909 | IPI00876027.1 | Exoc5        | 2.33 | 1.84 | - | 0.71743 |
| 4910 | IPI00314106.3 | Cecr5        | 2.34 | 1.26 | - | 0.78676 |
| 4911 | IPI00874453.1 | Sh3bgrl2     | 2.34 | 1.09 | - | 0.84785 |
| 4912 | IPI00754572.2 | Efr3b        | 2.34 | -    | - | -       |
| 4913 | IPI00876418.2 | Efr3b        | 2.34 | 0.89 | - | 0.63928 |
| 4914 | IPI00849728.1 | LOC100047762 | 2.35 | -    | - | -       |
| 4915 | IPI00515280.4 | Pkp4         | 2.35 | 0.54 | - | -       |
| 4916 | IPI00272878.6 | Dnm1         | 2.35 | 0.93 | - | -       |
| 4917 | IPI00845595.1 | Dnm1         | 2.35 | -    | - | -       |
| 4918 | IPI00331291.2 | Dnm1         | 2.35 | -    | - | -       |
| 4919 | IPI00753037.3 | Dnm1         | 2.35 | -    | - | -       |
| 4920 | IPI00753742.1 | LOC100046120 | 2.37 | 0.98 | - | 0.91447 |
| 4921 | IPI00320420.3 | Clu          | 2.37 | -    | - | -       |
| 4922 | IPI00756025.1 | Gm10313      | 2.38 | -    | - | -       |
| 4923 | IPI00280156.2 | Gm5514       | 2.38 | -    | - | -       |
| 4924 | IPI00955692.1 | Ahcyl2       | 2.40 | -    | - | -       |
| 4925 | IPI00756263.1 | Ahcyl2       | 2.40 | -    | - | -       |
| 4926 | IPI00742293.1 | Ahcyl2       | 2.40 | -    | - | -       |
| 4927 | IPI00130173.1 | Uba2         | 2.42 | 1.28 | - | 0.39388 |
| 4928 | IPI00606415.4 | Iqsec3       | 2.42 | 0.86 | - | 0.49522 |
| 4929 | IPI00330167.4 | Iqsec3       | 2.42 | -    | - | -       |
| 4930 | IPI00676574.2 | Herc1        | 2.43 | 0.58 | - | -       |
| 4931 | IPI00453863.3 | Efr3a        | 2.43 | -    | - | -       |
| 4932 | IPI00874856.1 | Efr3a        | 2.43 | -    | - | -       |
| 4933 | IPI00551399.3 | Efr3a        | 2.43 | 0.66 | - | 0.48898 |
| 4934 | IPI00889283.1 | Shank2       | 2.44 | -    | - | -       |
| 4935 | IPI00230680.7 | Atp4a        | 2.47 | 0.84 | - | -       |
| 4936 | IPI00911175.1 | Kcnn2        | 2.47 | -    | - | -       |
| 4937 | IPI00467814.2 | Kcnn2        | 2.47 | -    | - | -       |

|      |                |                 |      |      |   |         |
|------|----------------|-----------------|------|------|---|---------|
| 4938 | IPI00411075.1  | Pcbp3           | 2.52 | 1.10 | - | 0.76061 |
| 4939 | IPI00411074.2  | Pcbp3           | 2.52 | -    | - | -       |
| 4940 | IPI00850565.1  | LOC100044431    | 2.53 | 1.14 | - | 0.49522 |
| 4941 | IPI00624098.1  | Stxbp3a         | 2.53 | -    | - | -       |
| 4942 | IPI00652134.2  | Stxbp3a         | 2.53 | 0.79 | - | 0.42387 |
| 4943 | IPI00775779.11 | Sirpa           | 2.54 | -    | - | -       |
| 4944 | IPI00938439.1  | Dpp3            | 2.56 | 1.14 | - | 0.47605 |
| 4945 | IPI00459744.1  | Dpp3            | 2.56 | -    | - | -       |
| 4946 | IPI00116134.1  | Dpp3            | 2.56 | -    | - | -       |
| 4947 | IPI00123131.3  | Grasp           | 2.58 | -    | - | -       |
| 4948 | IPI00876559.1  | Khsrp           | 2.58 | 1.22 | - | 0.59028 |
| 4949 | IPI00462934.2  | Khsrp           | 2.58 | -    | - | -       |
| 4950 | IPI00331528.9  | Glrx            | 2.60 | 0.99 | - | 0.94639 |
| 4951 | IPI00277703.5  | Cyld            | 2.61 | -    | - | -       |
| 4952 | IPI00463127.4  | Cyld            | 2.61 | -    | - | -       |
| 4953 | IPI00463126.1  | Cyld            | 2.61 | 0.85 | - | 0.35843 |
| 4954 | IPI00460046.1  | Ralgapa1        | 2.61 | -    | - | -       |
| 4955 | IPI00751223.1  | Chchd3          | 2.62 | -    | - | -       |
| 4956 | IPI00754739.1  | LOC100046321;Cl | 2.62 | -    | - | -       |
| 4957 | IPI00656181.1  | Stxbp5l         | 2.66 | -    | - | -       |
| 4958 | IPI00656258.2  | Stxbp5l         | 2.66 | -    | - | -       |
| 4959 | IPI00845733.1  | Ppm1h           | 2.67 | -    | - | -       |
| 4960 | IPI00313899.4  | Cpne9           | 2.67 | 0.69 | - | 0.45837 |
| 4961 | IPI00606708.4  | Kcnj6           | 2.69 | -    | - | -       |
| 4962 | IPI00874328.1  | Kcnj6           | 2.69 | -    | - | -       |
| 4963 | IPI00227087.2  | Kcnj6           | 2.69 | -    | - | -       |
| 4964 | IPI00227086.2  | Kcnj6           | 2.69 | -    | - | -       |
| 4965 | IPI00313365.1  | Kcnj6           | 2.69 | -    | - | -       |
| 4966 | IPI00227085.2  | Kcnj6           | 2.69 | -    | - | -       |
| 4967 | IPI00955709.1  | Gm996           | 2.69 | 0.73 | - | 0.53529 |
| 4968 | IPI00845821.1  | Ppp1r1b         | 2.72 | -    | - | -       |
| 4969 | IPI00553338.2  | Atp1b2          | 2.72 | -    | - | -       |
| 4970 | IPI00128567.2  | Ache            | 2.75 | 0.87 | - | 0.74645 |
| 4971 | IPI00153133.4  | Lyplal1         | 2.75 | 1.23 | - | 0.37683 |
| 4972 | IPI00649556.1  | Dlg2            | 2.76 | -    | - | -       |
| 4973 | IPI00762199.2  | Ablim2          | 2.77 | -    | - | -       |
| 4974 | IPI00468743.5  | Ablim2          | 2.77 | 0.84 | - | -       |
| 4975 | IPI00856691.1  | Ablim2          | 2.77 | -    | - | -       |
| 4976 | IPI00480577.1  | Ablim2          | 2.77 | -    | - | -       |
| 4977 | IPI00226694.3  | Ablim2          | 2.77 | -    | - | -       |
| 4978 | IPI00463583.1  | Ablim2          | 2.77 | -    | - | -       |
| 4979 | IPI00312739.3  | Ablim2          | 2.77 | 0.90 | - | -       |
| 4980 | IPI00466988.2  | Dlg2            | 2.79 | -    | - | -       |
| 4981 | IPI00129282.1  | Dlg2            | 2.79 | -    | - | -       |
| 4982 | IPI00775894.1  | Il1rap1l        | 2.80 | -    | - | -       |
| 4983 | IPI00117332.1  | Nptx2           | 2.80 | 0.83 | - | -       |
| 4984 | IPI00108960.3  | Fbxl16          | 2.81 | 0.78 | - | 0.52993 |
| 4985 | IPI00380474.2  | Lpar1           | 2.84 | -    | - | -       |
| 4986 | IPI00406388.2  | Lpar1           | 2.84 | 0.98 | - | 0.96994 |
| 4987 | IPI00759857.1  | Mlycd           | 2.87 | 1.16 | - | 0.39388 |
| 4988 | IPI00114866.1  | Mlycd           | 2.87 | -    | - | -       |
| 4989 | IPI00331076.4  | Slk             | 2.88 | -    | - | -       |



|      |               |                |      |      |   |         |
|------|---------------|----------------|------|------|---|---------|
| 4990 | IPI00749669.1 | Slk            | 2.88 | 0.71 | - | 0.64484 |
| 4991 | IPI00133030.3 | Sec61b         | 2.88 | -    | - | -       |
| 4992 | IPI00755226.2 | LOC100047311;G | 2.88 | 1.22 | - | 0.71639 |
| 4993 | IPI00750947.1 | Tpd52l2        | 2.89 | 0.77 | - | 0.39831 |
| 4994 | IPI00755183.1 | Tpd52l2        | 2.89 | -    | - | -       |
| 4995 | IPI00319046.1 | Tpd52l2        | 2.89 | -    | - | -       |
| 4996 | IPI00409101.3 | Tpd52l2        | 2.89 | 0.69 | - | -       |
| 4997 | IPI00648449.5 | Arhgap23       | 2.92 | -    | - | -       |
| 4998 | IPI00649958.4 | Arhgap23       | 2.92 | 0.71 | - | 0.35843 |
| 4999 | IPI00268767.4 | Gpm6b          | 2.95 | -    | - | -       |
| 5000 | IPI00122975.1 | Gpm6b          | 2.95 | -    | - | -       |
| 5001 | IPI00874422.1 | Gpm6b          | 2.95 | -    | - | -       |
| 5002 | IPI00337066.3 | Trim9          | 2.96 | -    | - | -       |
| 5003 | IPI00354319.2 | Trim9          | 2.96 | 0.77 | - | -       |
| 5004 | IPI00337064.1 | Trim9          | 2.96 | -    | - | -       |
| 5005 | IPI00331543.1 | Rasal1         | 2.97 | 0.87 | - | 0.56509 |
| 5006 | IPI00130555.1 | Rasal1         | 2.97 | -    | - | -       |
| 5007 | IPI00850111.1 | LOC100047539   | 2.99 | -    | - | -       |
| 5008 | IPI00775883.1 | Syp            | 3.06 | -    | - | -       |
| 5009 | IPI00130331.3 | L2hgdh         | 3.09 | 0.85 | - | 0.4316  |
| 5010 | IPI00881571.1 | Ssbp1          | 3.16 | -    | - | -       |
| 5011 | IPI00408243.1 | Ssbp1          | 3.16 | 0.99 | - | 0.98006 |
| 5012 | IPI00111877.1 | Ssbp1          | 3.16 | -    | - | -       |
| 5013 | IPI00114285.1 | Gsto1          | 3.20 | 0.65 | - | 0.63964 |
| 5014 | IPI00115089.2 | Entpd2         | 3.20 | 0.79 | - | 0.5524  |
| 5015 | IPI00881282.1 | Pld1           | 3.25 | -    | - | -       |
| 5016 | IPI00130629.3 | Pld1           | 3.25 | -    | - | -       |
| 5017 | IPI00229888.1 | Pld1           | 3.25 | -    | - | -       |
| 5018 | IPI00421083.1 | Pld1           | 3.25 | -    | - | -       |
| 5019 | IPI00170121.1 | Lgi3           | 3.29 | 0.91 | - | 0.62108 |
| 5020 | IPI00408580.6 | Trim9          | 3.30 | -    | - | -       |
| 5021 | IPI00337062.1 | Trim9          | 3.30 | -    | - | -       |
| 5022 | IPI00404199.2 | Bcas1          | 3.31 | -    | - | -       |
| 5023 | IPI00137288.1 | Efh1           | 3.37 | -    | - | -       |
| 5024 | IPI00110107.2 | Epb4.1l2       | 3.37 | -    | - | -       |
| 5025 | IPI00875941.2 | Kidins220      | 3.39 | -    | - | -       |
| 5026 | IPI00876533.1 | Kidins220      | 3.39 | -    | - | -       |
| 5027 | IPI00830981.2 | Mtap7d2        | 3.45 | -    | - | -       |
| 5028 | IPI00830556.1 | Mtap7d2        | 3.45 | -    | - | -       |
| 5029 | IPI00470115.3 | Trim9          | 3.46 | -    | - | -       |
| 5030 | IPI00648855.1 | Penk           | 3.54 | 0.71 | - | 0.59331 |
| 5031 | IPI00123302.2 | Penk           | 3.54 | -    | - | -       |
| 5032 | IPI00222827.1 | Its1n2         | 3.64 | -    | - | -       |
| 5033 | IPI00123891.3 | Csrp1          | 3.64 | 0.68 | - | 0.37683 |
| 5034 | IPI00132278.1 | Cplx1          | 3.67 | 0.87 | - | 0.4316  |
| 5035 | IPI00343557.1 | Mapre3         | 3.72 | 1.05 | - | 0.59544 |
| 5036 | IPI00312752.3 | Sh3gl1         | 3.72 | 1.19 | - | -       |
| 5037 | IPI00850215.1 | LOC100048880   | 3.74 | -    | - | -       |
| 5038 | IPI00553355.1 | Pde1a          | 3.76 | -    | - | -       |
| 5039 | IPI00874497.1 | Pde1a          | 3.76 | -    | - | -       |
| 5040 | IPI00223497.1 | Pde1a          | 3.76 | 0.76 | - | 0.35843 |
| 5041 | IPI00551326.1 | Pde1a          | 3.76 | -    | - | -       |

|      |               |          |       |      |   |         |
|------|---------------|----------|-------|------|---|---------|
| 5042 | IPI00121336.1 | Pde1a    | 3.76  | -    | - | -       |
| 5043 | IPI00754989.1 | Slc39a12 | 3.79  | -    | - | -       |
| 5044 | IPI00129703.1 | Rcan2    | 3.88  | -    | - | -       |
| 5045 | IPI00119345.1 | Rcan2    | 3.88  | -    | - | -       |
| 5046 | IPI00122251.1 | Pdk2     | 3.91  | -    | - | -       |
| 5047 | IPI00929911.1 | Pdk2     | 3.91  | 0.85 | - | 0.31297 |
| 5048 | IPI00120751.8 | Slc2a13  | 3.97  | 1.13 | - | 0.53529 |
| 5049 | IPI00828915.1 | Mfsd4    | 4.00  | -    | - | -       |
| 5050 | IPI00828869.1 | Mfsd4    | 4.00  | 0.73 | - | -       |
| 5051 | IPI00228083.4 | Mfsd4    | 4.00  | -    | - | -       |
| 5052 | IPI00890914.1 | Prex2    | 4.00  | -    | - | -       |
| 5053 | IPI00461626.1 | Prmt3    | 4.05  | 0.86 | - | 0.56724 |
| 5054 | IPI00172906.2 | Sdk2     | 4.07  | 1.36 | - | -       |
| 5055 | IPI00311406.2 | Mrpl39   | 4.14  | -    | - | -       |
| 5056 | IPI00858168.1 | Mrpl39   | 4.14  | 1.15 | - | 0.76841 |
| 5057 | IPI00923113.1 |          | 4.17  | -    | - | -       |
| 5058 | IPI00269461.2 | Dusp15   | 4.17  | 1.14 | - | -       |
| 5059 | IPI00757472.1 | Dusp15   | 4.17  | -    | - | -       |
| 5060 | IPI00153936.1 | Dusp15   | 4.17  | -    | - | -       |
| 5061 | IPI00270376.6 | Cxadr    | 4.35  | -    | - | -       |
| 5062 | IPI00118835.1 | Rasgrf1  | 4.47  | 0.75 | - | 0.58714 |
| 5063 | IPI00474272.3 | Mrpl45   | 4.63  | 1.03 | - | -       |
| 5064 | IPI00123672.1 | Kcnj4    | 4.64  | -    | - | -       |
| 5065 | IPI00874804.1 | Kcnj4    | 4.64  | 0.76 | - | -       |
| 5066 | IPI00457597.1 | Anks1b   | 4.68  | 0.76 | - | 0.39388 |
| 5067 | IPI00457583.1 | Anks1b   | 4.68  | -    | - | -       |
| 5068 | IPI00473373.2 | Syne1    | 4.80  | -    | - | -       |
| 5069 | IPI00112139.1 | Ociad2   | 4.93  | 1.06 | - | 0.73963 |
| 5070 | IPI00882305.1 | Hagh     | 5.33  | -    | - | -       |
| 5071 | IPI00128227.3 | Tmem38a  | 5.60  | 1.16 | - | 0.62995 |
| 5072 | IPI00655150.1 | Tmod1    | 6.47  | 1.24 | - | 0.73026 |
| 5073 | IPI00309658.1 | Tmod1    | 6.47  | -    | - | -       |
| 5074 | IPI00830740.1 | Alg11    | 7.40  | -    | - | -       |
| 5075 | IPI00652804.2 | Alg11    | 7.40  | -    | - | -       |
| 5076 | IPI00854962.1 | Alg11    | 7.40  | -    | - | -       |
| 5077 | IPI00225530.1 | Slc24a2  | 7.77  | 1.02 | - | -       |
| 5078 | IPI00114819.3 | Wdr77    | 9.47  | -    | - | -       |
| 5079 | IPI00225518.1 | Fam163b  | 9.75  | 0.61 | - | -       |
| 5080 | IPI00123619.7 | Cyp2d22  | 10.75 | 0.87 | - | 0.64484 |
| 5081 | IPI00118069.1 | F3       | 11.56 | -    | - | -       |
| 5082 | IPI00462790.2 | F3       | 11.56 | 1.08 | - | -       |
| 5083 | IPI00408207.2 | Myo1d    | 12.50 | 0.75 | - | 0.32827 |
| 5084 | IPI00226551.2 | Myo1d    | 16.50 | -    | - | -       |
| 5085 | IPI00903427.1 | Nisch    | 16.57 | -    | - | -       |
| 5086 | IPI00110435.2 | Nisch    | 16.57 | 1.04 | - | -       |
| 5087 | IPI00903425.1 | Nisch    | 16.57 | -    | - | -       |
| 5088 | IPI00903374.1 | Nisch    | 16.57 | 1.01 | - | -       |
| 5089 | IPI00857354.1 | Slc12a6  | 22.07 | -    | - | -       |
| 5090 | IPI00120165.1 | Crot     | 49.33 | -    | - | -       |
