# Supplementary material
Source: PubMed Central journal article supplement (PMC4553823)
Supplement: pnas.1502258112.sd02.pdf [file pnas.1502258112.sd02.pdf]

Table S2. Significantly changed proteins in P17 and their pSILAC ratios. The first 19 unique protein groups are core synaptic proteins that are upregulated in KO in P17 and overlap with all three databases

| Locus         | Symbol   | KO/WT_P17 | KO/WT_P45 | 6-hour stimulation |                   |                   |                   | 5-minute stimulation |                | Databases |          |             |
|---------------|----------|-----------|-----------|--------------------|-------------------|-------------------|-------------------|----------------------|----------------|-----------|----------|-------------|
|               |          |           |           | Ratio H/M(K/W)_S2  | Ratio H/M(W/K)_S2 | Ratio H/M(K/W)_P2 | Ratio H/M(W/K)_P2 | Ratio H/M(K/W)       | Ratio H/M(W/K) | autismDB  | moPSP    | FMRP_target |
| IPI00831180.1 | Atp2b2   | 2.32      | 0.85      |                    |                   | 1.08              | 0.49              | 1.01                 | 0.55           | Atp2b2    | Atp2b2   | ATP2B2      |
| IPI00127713.1 | Atp2b2   | 2.32      | -         |                    |                   | 1.08              | 0.49              | 1.01                 | 0.55           | Atp2b2    | Atp2b2   | ATP2B2      |
| IPI00622720.1 | Dlg4     | 3.00      | 0.72      |                    |                   |                   |                   | 1.90                 | 0.53           | Dlg4      | Dlg4     | DLG4        |
| IPI00122094.2 | Dlg4     | 3.00      | -         |                    |                   |                   |                   | 1.90                 | 0.53           | Dlg4      | Dlg4     | DLG4        |
| IPI00626797.1 | Dlg4     | 3.00      | -         |                    |                   |                   |                   | 1.90                 | 0.53           | Dlg4      | Dlg4     | DLG4        |
| IPI00467058.2 | Dlgap2   | 4.38      | 0.85      |                    |                   |                   |                   | 0.60                 | 0.23           | Dlgap2    | Dlgap2   | DLGAP2      |
| IPI00222263.4 | Dlgap2   | 4.38      | -         |                    |                   |                   |                   | 0.60                 | 0.23           | Dlgap2    | Dlgap2   | DLGAP2      |
| IPI00928507.1 | Dlgap2   | 4.38      | -         |                    |                   |                   |                   | 0.60                 | 0.23           | Dlgap2    | Dlgap2   | DLGAP2      |
| IPI00321320.3 | Grin2b   | 1.41      | 0.79      |                    |                   |                   | 0.60              |                      |                | Grin2b    | Grin2b   | GRIN2B      |
| IPI00758248.3 | Iqsec2   | 2.24      | 0.81      |                    |                   |                   |                   | 1.83                 | 0.54           | Iqsec2    | Iqsec2   | IQSEC2      |
| IPI00410901.1 | Kcnma1   | 2.50      | 0.69      |                    |                   |                   |                   |                      |                | Kcnma1    | Kcnma1   | KCNMA1      |
| IPI00410905.2 | Kcnma1   | 2.50      | 0.92      |                    |                   |                   |                   |                      |                | Kcnma1    | Kcnma1   | KCNMA1      |
| IPI00410904.1 | Kcnma1   | 2.50      | -         |                    |                   |                   |                   |                      |                | Kcnma1    | Kcnma1   | KCNMA1      |
| IPI00410903.3 | Kcnma1   | 2.50      | -         |                    |                   |                   |                   |                      |                | Kcnma1    | Kcnma1   | KCNMA1      |
| IPI00120643.1 | Kcnma1   | 2.50      | -         |                    |                   |                   |                   |                      |                | Kcnma1    | Kcnma1   | KCNMA1      |
| IPI00875695.1 | Lrrc7    | 2.09      | 0.70      |                    |                   |                   |                   |                      |                | Lrrc7     | Lrrc7    | LRRC7       |
| IPI00831714.2 | Lrrc7    | 2.13      | -         |                    |                   |                   |                   |                      |                | Lrrc7     | Lrrc7    | LRRC7       |
| IPI00119663.3 | Mapk1    | 1.61      | 1.07      | 1.63               | 0.89              | 0.69              | 0.87              | 1.32                 | 0.80           | Mapk1     | Mapk1    | MAPK1       |
| IPI00228680.2 | Nrxn3    | 1.56      | 0.84      |                    |                   |                   | 0.37              |                      |                | Nrxn3     | Nrxn3    | NRXN3       |
| IPI00876463.1 | Prickle2 | 1.88      | 0.32      |                    |                   |                   |                   |                      |                | Prickle2  | Prickle2 | PRICKLE2    |
| IPI00349970.6 | Prickle2 | 1.88      | -         |                    |                   |                   |                   |                      |                | Prickle2  | Prickle2 | PRICKLE2    |
| IPI00227898.3 | Prkcb    | 2.32      | 0.88      |                    |                   |                   |                   | 0.42                 | 0.64           | Prkcb     | Prkcb    | PRKCB       |
| IPI00606039.3 | Shank1   | 1.80      | 0.74      |                    |                   |                   |                   |                      |                | Shank1    | Shank1   | SHANK1      |
| IPI00465999.5 | Shank1   | 1.90      | -         |                    |                   |                   |                   |                      |                | Shank1    | Shank1   | SHANK1      |
| IPI00758339.1 | Shank1   | 1.90      | -         |                    |                   |                   |                   |                      |                | Shank1    | Shank1   | SHANK1      |
| IPI00757097.2 | Shank2   | 1.67      | 0.70      |                    |                   |                   | 1.51              | 0.76                 | 1.61           | Shank2    | Shank2   | SHANK2      |
| IPI00351827.6 | Shank3   | 2.93      | 0.71      |                    |                   |                   |                   |                      |                | Shank3    | Shank3   | SHANK3      |
| IPI00415402.3 | Stxbp1   | 1.68      | 0.89      | 2.40               | 0.48              | 0.45              | 0.40              | 1.13                 | 0.78           | Stxbp1    | Stxbp1   | STXBP1      |
| IPI00415403.1 | Stxbp1   | 1.68      | 0.90      | 2.40               | 0.48              | 0.45              | 0.40              | 1.13                 | 0.78           | Stxbp1    | Stxbp1   | STXBP1      |
| IPI00656317.2 | Stxbp5   | 1.65      | -         |                    |                   |                   |                   | 0.43                 | 0.03           | Stxbp5    | Stxbp5   | STXBP5      |
| IPI00918655.1 | Stxbp5   | 1.74      | -         |                    |                   |                   |                   | 0.43                 | 0.03           | Stxbp5    | Stxbp5   | STXBP5      |
| IPI00875100.1 | Stxbp5   | 1.74      | -         |                    |                   |                   |                   | 0.43                 | 0.03           | Stxbp5    | Stxbp5   | STXBP5      |
| IPI00649886.1 | Syn1     | 1.90      | 1.00      | 1.86               | 0.36              | 1.25              | 0.57              | 1.37                 | 0.91           | Syn1      | Syn1     | SYN1        |
| IPI00649467.3 | Syn1     | 1.98      | -         | 1.86               | 0.36              | 1.25              | 0.57              | 1.37                 | 0.91           | Syn1      | Syn1     | SYN1        |
| IPI00890038.2 | Syne1    | 3.50      | 0.59      |                    |                   |                   |                   | 2.52                 | 0.57           | Syne1     | Syne1    | SYNE1       |
| IPI00403993.5 | Syne1    | 3.50      | -         |                    |                   |                   |                   | 2.52                 | 0.57           | Syne1     | Syne1    | SYNE1       |
| IPI00663736.2 | Syngap1  | 3.41      | 0.73      |                    |                   |                   | 0.40              | 2.45                 | 0.33           | Syngap1   | Syngap1  | SYNGAP1     |
| IPI00459465.1 | Baiap2   | 2.88      | -         |                    |                   |                   |                   | 0.58                 | 0.94           | Baiap2    | Baiap2   |             |
| IPI00222731.2 | Baiap2   | 3.23      | 0.82      |                    |                   |                   |                   | 0.58                 | 0.94           | Baiap2    | Baiap2   |             |
| IPI00124778.1 | Baiap2   | 3.23      | -         |                    |                   |                   |                   | 0.58                 | 0.94           | Baiap2    | Baiap2   |             |
| IPI00649474.1 | Baiap2   | 3.23      | -         |                    |                   |                   |                   | 0.58                 | 0.94           | Baiap2    | Baiap2   |             |
| IPI00648827.1 | Baiap2   | 3.23      | -         |                    |                   |                   |                   | 0.58                 | 0.94           | Baiap2    | Baiap2   |             |
| IPI00114352.1 | Bin1     | 1.38      | 0.93      | 0.60               | 0.62              | 0.55              | 0.36              | 0.97                 | 1.01           | Bin1      | Bin1     |             |
| IPI00880742.1 | Dpp6     | 2.07      | -         |                    |                   |                   |                   | 0.89                 | 1.43           | Dpp6      | Dpp6     |             |
| IPI00318496.1 | Gad1     | 2.32      | 1.08      |                    |                   | 1.74              |                   |                      |                | Gad1      | Gad1     |             |

|               |          |      |      |      |      |      |      |      |      |          |           |
|---------------|----------|------|------|------|------|------|------|------|------|----------|-----------|
| IPI00331182.4 | Gpd2     | 1.49 | -    |      |      | 0.52 | 0.56 | 0.94 | 0.58 | Gpd2     | Gpd2      |
| IPI00876084.1 | Gpd2     | 1.51 | 1.06 |      |      | 0.52 | 0.56 | 0.94 | 0.58 | Gpd2     | Gpd2      |
| IPI00395134.4 | Homer1   | 1.94 | 0.78 |      |      |      | 0.81 | 0.72 | 0.60 | Homer1   | Homer1    |
| IPI00349908.6 | Il1rapl1 | 1.65 | -    |      |      |      |      |      |      | Il1rapl1 | Il1rapl1  |
| IPI00463026.4 | Il1rapl1 | 2.58 | 1.53 |      |      |      |      |      |      | Il1rapl1 | Il1rapl1  |
| IPI00757585.1 | Klc2     | 0.78 | 0.95 | 2.27 | 0.64 |      | 0.46 | 1.03 | 0.79 | Klc2     | Klc2      |
| IPI00753928.1 | Klc2     | 0.78 | -    | 2.27 | 0.64 |      | 0.46 | 1.03 | 0.79 | Klc2     | Klc2      |
| IPI00844651.1 | Klc2     | 0.78 | -    | 2.27 | 0.64 |      | 0.46 | 1.03 | 0.79 | Klc2     | Klc2      |
| IPI00225254.6 | Mtx2     | 1.49 | 1.08 |      |      |      |      | 1.42 | 0.69 | Mtx2     | Mtx2      |
| IPI00676211.4 | Psd3     | 1.79 | 0.96 |      |      |      |      | 2.07 | 1.04 | Psd3     | Psd3      |
| IPI00874973.1 | Psd3     | 1.79 | -    |      |      |      |      | 2.07 | 1.04 | Psd3     | Psd3      |
| IPI00875485.1 | Psd3     | 1.79 | -    |      |      |      |      | 2.07 | 1.04 | Psd3     | Psd3      |
| IPI00407352.4 | Psd3     | 1.83 | -    |      |      |      |      | 2.07 | 1.04 | Psd3     | Psd3      |
| IPI00881789.1 | Psd3     | 1.85 | -    |      |      |      |      | 2.07 | 1.04 | Psd3     | Psd3      |
| IPI00620507.2 | Psd3     | 1.85 | -    |      |      |      |      | 2.07 | 1.04 | Psd3     | Psd3      |
| IPI00761643.2 | Psd3     | 1.88 | -    |      |      |      |      | 2.07 | 1.04 | Psd3     | Psd3      |
| IPI00761957.1 | Psd3     | 1.95 | -    |      |      |      |      | 2.07 | 1.04 | Psd3     | Psd3      |
| IPI00118769.2 | Rgs7     | 1.96 | 0.92 |      |      |      |      |      |      | Rgs7     | Rgs7      |
| IPI00627029.1 | Rgs7     | 2.02 | 0.89 |      |      |      |      |      |      | Rgs7     | Rgs7      |
| IPI00875257.1 | Rgs7     | 2.02 | -    |      |      |      |      |      |      | Rgs7     | Rgs7      |
| IPI00308162.3 | Slc25a12 | 1.45 | 1.05 |      |      | 0.57 | 0.68 | 1.20 | 0.89 | Slc25a12 | Slc25a12  |
| IPI00555118.4 | Slc4a10  | 2.55 | 0.89 |      |      |      |      |      |      | Slc4a10  | Slc4a10   |
| IPI00752501.2 | Slc4a10  | 2.55 | 1.21 |      |      |      |      |      |      | Slc4a10  | Slc4a10   |
| IPI00227302.6 | Slc4a10  | 2.55 | -    |      |      |      |      |      |      | Slc4a10  | Slc4a10   |
| IPI00131618.1 | Stx1a    | 1.66 | 1.00 |      |      | 0.59 | 0.48 | 2.18 | 0.82 | Stx1a    | Stx1a     |
| IPI00134492.4 | Syn2     | 2.67 | 0.99 |      |      | 0.84 | 0.62 | 1.32 | 0.87 | Syn2     | Syn2      |
| IPI00469548.2 | Syn2     | 2.71 | 0.93 |      |      | 0.84 | 0.62 | 1.32 | 0.87 | Syn2     | Syn2      |
| IPI00407499.1 | Abat     | 2.54 | 0.99 | 1.86 | 0.31 | 0.65 | 0.90 | 1.14 | 0.68 | Abat     |           |
| IPI00816877.1 | Adcy5    | 1.50 | 0.76 |      |      |      |      |      |      | Adcy5    | ADCY5     |
| IPI00756908.2 | Adcy5    | 1.50 | -    |      |      |      |      |      |      | Adcy5    | ADCY5     |
| IPI00273164.1 | Aldh5a1  | 1.54 | 1.01 |      |      | 1.08 | 0.40 | 1.01 | 0.77 | Aldh5a1  |           |
| IPI00877328.1 | Camk4    | 1.55 | 0.88 |      |      |      |      | 0.43 | 0.68 | Camk4    |           |
| IPI00132526.1 | Camk4    | 1.55 | -    |      |      |      |      | 0.43 | 0.68 | Camk4    |           |
| IPI00134997.3 | Dlgap3   | 2.48 | -    |      |      |      |      |      |      | Dlgap3   | DLGAP3    |
| IPI00648401.1 | Dlgap3   | 2.67 | 0.59 |      |      |      |      |      |      | Dlgap3   | DLGAP3    |
| IPI00556723.1 | Dnm1l    | 1.54 | 0.93 | 0.74 | 0.69 | 0.57 | 0.38 | 0.43 | 0.11 | Dnm1l    |           |
| IPI00830456.1 | Dpp10    | 1.92 | 0.85 |      |      |      |      |      |      | Dpp10    |           |
| IPI00396687.3 | Dpp10    | 1.92 | -    |      |      |      |      |      |      | Dpp10    |           |
| IPI00118978.4 | Hcn1     | 2.41 | 0.70 |      |      |      |      |      |      | Hcn1     |           |
| IPI00885751.1 | Hsd11b1  | 6.10 | 1.23 |      |      |      |      |      |      | Hsd11b1  |           |
| IPI00115599.6 | Hsd11b1  | 6.10 | -    |      |      |      |      |      |      | Hsd11b1  |           |
| IPI00124792.1 | Kcnj10   | 2.75 | 1.00 |      |      |      |      | 1.27 | 0.83 | Kcnj10   |           |
| IPI00944790.1 | Maob     | 1.92 | 0.92 |      |      |      |      | 0.82 | 1.99 | Maob     |           |
| IPI00226140.5 | Maob     | 1.92 | -    |      |      |      |      | 0.82 | 1.99 | Maob     |           |
| IPI00331332.6 | Ndufa5   | 1.50 | 1.03 |      |      |      | 0.85 | 0.77 | 0.98 | Ndufa5   |           |
| IPI00338880.3 | Nrcam    | 1.49 | 0.90 | 1.41 | 1.09 | 1.06 | 0.65 | 0.80 | 0.59 | Nrcam    |           |
| IPI00876075.1 | Nrcam    | 1.61 | 0.80 | 1.41 | 1.09 | 1.06 | 0.65 | 0.80 | 0.59 | Nrcam    |           |
| IPI00121349.3 | Ppp1r1b  | 2.79 | 0.82 |      |      |      |      |      |      | Ppp1r1b  |           |
| IPI00356608.4 | Aak1     | 1.93 | -    |      |      | 0.49 | 0.73 | 1.77 | 0.65 |          | Aak1 AAK1 |

|               |        |      |      |      |      |      |      |      |      |        |       |
|---------------|--------|------|------|------|------|------|------|------|------|--------|-------|
| IPI00458612.5 | Aak1   | 2.01 | 0.87 |      |      | 0.49 | 0.73 | 1.77 | 0.65 | Aak1   | AAK1  |
| IPI00762047.1 | Acly   | 0.78 | 0.77 | 1.10 | 0.83 | 0.92 | 0.90 | 1.08 | 0.69 | Acly   | ACLY  |
| IPI00126248.3 | Acly   | 0.78 | 0.95 | 1.10 | 0.83 | 0.92 | 0.90 | 1.08 | 0.69 | Acly   | ACLY  |
| IPI00116074.1 | Aco2   | 1.61 | 1.01 | 0.43 | 0.49 | 0.67 | 0.86 | 1.03 | 0.47 | Aco2   | ACO2  |
| IPI00453834.2 | Acsbg1 | 1.94 | 0.89 | 1.01 | 1.25 | 0.83 | 1.44 | 1.32 | 1.02 | Acsbg1 |       |
| IPI00649775.1 | Acsl6  | 2.20 | 0.96 |      |      | 1.10 | 1.00 | 2.06 | 0.90 | Acsl6  |       |
| IPI00262693.4 | Acsl6  | 2.20 | -    |      |      | 1.10 | 1.00 | 2.06 | 0.90 | Acsl6  |       |
| IPI00625955.1 | Acsl6  | 2.24 | 1.01 |      |      | 1.10 | 1.00 | 2.06 | 0.90 | Acsl6  |       |
| IPI00123390.8 | Acsl6  | 2.24 | -    |      |      | 1.10 | 1.00 | 2.06 | 0.90 | Acsl6  |       |
| IPI00553820.1 | Acsl6  | 2.24 | -    |      |      | 1.10 | 1.00 | 2.06 | 0.90 | Acsl6  |       |
| IPI00380436.1 | Actn1  | 2.17 | 0.93 | 0.65 | 0.65 | 0.90 | 0.91 | 0.64 | 0.88 | Actn1  |       |
| IPI00515160.2 | Adam22 | 1.78 | 0.79 |      |      |      |      |      |      | Adam22 |       |
| IPI00755165.1 | Adam22 | 1.78 | -    |      |      |      |      |      |      | Adam22 |       |
| IPI00515604.2 | Adam22 | 1.78 | -    |      |      |      |      |      |      | Adam22 |       |
| IPI00515396.2 | Adam22 | 1.78 | -    |      |      |      |      |      |      | Adam22 |       |
| IPI00515580.2 | Adam22 | 1.78 | -    |      |      |      |      |      |      | Adam22 |       |
| IPI00753070.1 | Adam22 | 1.78 | -    |      |      |      |      |      |      | Adam22 |       |
| IPI00753519.1 | Adam22 | 1.78 | -    |      |      |      |      |      |      | Adam22 |       |
| IPI00749834.1 | Adam22 | 1.78 | -    |      |      |      |      |      |      | Adam22 |       |
| IPI00404650.2 | Adam22 | 1.78 | -    |      |      |      |      |      |      | Adam22 |       |
| IPI00752334.1 | Adam22 | 1.78 | -    |      |      |      |      |      |      | Adam22 |       |
| IPI00515509.2 | Adam22 | 1.78 | -    |      |      |      |      |      |      | Adam22 |       |
| IPI00753983.1 | Adam22 | 1.78 | -    |      |      |      |      |      |      | Adam22 |       |
| IPI00752342.1 | Adam22 | 1.78 | -    |      |      |      |      |      |      | Adam22 |       |
| IPI00458023.4 | Adam23 | 2.29 | 0.84 |      |      |      |      |      |      | Adam23 |       |
| IPI00129175.1 | Adam23 | 2.29 | -    |      |      |      |      |      |      | Adam23 |       |
| IPI00648033.1 | Adam23 | 2.29 | -    |      |      |      |      |      |      | Adam23 |       |
| IPI00649891.2 | Adam23 | 2.29 | -    |      |      |      |      |      |      | Adam23 |       |
| IPI00480277.1 | Adam23 | 2.29 | -    |      |      |      |      |      |      | Adam23 |       |
| IPI00648288.1 | Adam23 | 2.29 | -    |      |      |      |      |      |      | Adam23 |       |
| IPI00650001.3 | Adam23 | 2.29 | -    |      |      |      |      |      |      | Adam23 |       |
| IPI00458025.2 | Adam23 | 2.29 | -    |      |      |      |      |      |      | Adam23 |       |
| IPI00113606.2 | Agk    | 1.41 | 1.06 |      |      |      |      | 1.03 | 0.59 | Agk    |       |
| IPI00750256.2 | Ak1    | 1.58 | 0.96 | 0.87 | 0.45 | 0.62 | 0.78 | 1.13 | 0.82 | Ak1    |       |
| IPI00128209.3 | Ak1    | 1.58 | -    | 0.87 | 0.45 | 0.62 | 0.78 | 1.13 | 0.82 | Ak1    |       |
| IPI00856379.1 | Aldoa  | 2.26 | 0.99 | 0.68 | 1.96 | 1.61 | 0.58 |      |      | Aldoa  | ALDOA |
| IPI00221402.7 | Aldoa  | 2.26 | -    | 0.68 | 1.96 | 1.61 | 0.58 |      |      | Aldoa  | ALDOA |
| IPI00119458.7 | Aldoc  | 2.24 | 0.93 | 1.56 | 0.78 | 1.57 | 0.75 | 1.00 | 0.89 | Aldoc  | ALDOC |
| IPI00400180.1 | Amph   | 1.41 | 1.03 | 0.83 | 0.40 | 0.46 | 0.73 | 0.79 | 0.67 | Amph   | AMPH  |
| IPI00664176.1 | Anks1b | 4.35 | 0.83 |      |      |      |      |      |      | Anks1b |       |
| IPI00346965.5 | Ap1b1  | 1.51 | -    | 0.56 | 0.44 | 0.37 | 0.59 | 1.12 | 0.78 | Ap1b1  | AP1B1 |
| IPI00648683.3 | Ap1b1  | 1.53 | 0.94 | 0.56 | 0.44 | 0.37 | 0.59 | 1.12 | 0.78 | Ap1b1  | AP1B1 |
| IPI00108780.7 | Ap2a1  | 1.64 | 0.74 | 1.27 | 1.28 | 1.04 | 0.92 | 1.28 | 0.70 | Ap2a1  | AP2A1 |
| IPI00622911.1 | Ap2a1  | 1.64 | 0.96 | 1.27 | 1.28 | 1.04 | 0.92 | 1.28 | 0.70 | Ap2a1  | AP2A1 |
| IPI00753468.2 | Ap2a2  | 1.34 | 0.88 | 1.01 | 0.62 | 1.04 | 0.75 | 1.33 | 0.60 | Ap2a2  | AP2A2 |
| IPI00378063.1 | Ap2b1  | 1.36 | 0.88 | 0.76 | 0.67 | 0.50 | 0.57 | 1.05 | 0.68 | Ap2b1  | AP2B1 |
| IPI00622811.2 | Ap2m1  | 1.58 | 0.91 | 2.84 | 0.91 | 1.05 | 0.86 |      |      | Ap2m1  |       |
| IPI00116356.5 | Ap2m1  | 1.58 | 1.14 | 2.84 | 0.91 | 1.05 | 0.86 |      |      | Ap2m1  |       |
| IPI00658743.2 | Apoo   | 1.62 | 1.18 |      |      |      |      | 0.99 | 0.80 | Apoo   |       |

|               |          |      |      |      |      |      |      |      |      |          |          |
|---------------|----------|------|------|------|------|------|------|------|------|----------|----------|
| IPI00121576.2 | Apoo     | 1.62 | -    |      |      |      |      | 0.99 | 0.80 | Apoo     |          |
| IPI00670400.2 | Apoo     | 1.62 | -    |      |      |      |      | 0.99 | 0.80 | Apoo     |          |
| IPI00221614.3 | Arf3     | 1.32 | 0.94 |      |      |      |      |      |      | Arf3     | ARF3     |
| IPI00900466.1 | Arhgef2  | 1.84 | 1.09 |      |      |      |      | 0.90 | 0.47 | Arhgef2  | ARHGEF2  |
| IPI00900401.1 | Arhgef2  | 1.84 | 1.19 |      |      |      |      | 0.90 | 0.47 | Arhgef2  | ARHGEF2  |
| IPI00310764.7 | Arhgef2  | 1.84 | 1.25 |      |      |      |      | 0.90 | 0.47 | Arhgef2  | ARHGEF2  |
| IPI00757909.2 | Armc10   | 0.65 | 1.18 |      |      | 0.53 | 0.60 | 1.58 | 0.61 | Armc10   |          |
| IPI00857618.1 | Armc10   | 0.65 | -    |      |      | 0.53 | 0.60 | 1.58 | 0.61 | Armc10   |          |
| IPI00137460.3 | Armc10   | 0.65 | -    |      |      | 0.53 | 0.60 | 1.58 | 0.61 | Armc10   |          |
| IPI00661414.2 | Arpc2    | 1.23 | 0.94 | 0.89 | 1.36 | 0.05 | 0.28 | 0.90 | 0.81 | Arpc2    |          |
| IPI00311682.5 | Atp1a1   | 2.31 | 0.86 | 1.34 | 0.65 | 1.51 | 0.96 | 0.97 | 0.94 | Atp1a1   | ATP1A1   |
| IPI00762871.2 | Atp1a2   | 1.93 | 0.79 | 1.69 | 0.93 | 1.51 | 0.77 | 1.08 | 0.93 | Atp1a2   | ATP1A2   |
| IPI00420569.2 | Atp1a2   | 2.00 | 0.84 | 1.69 | 0.93 | 1.51 | 0.77 | 1.08 | 0.93 | Atp1a2   | ATP1A2   |
| IPI00752412.1 | Atp1a3   | 1.86 | 0.68 | 1.48 | 0.89 | 2.12 | 0.61 | 1.01 | 0.74 | Atp1a3   | ATP1A3   |
| IPI00122048.2 | Atp1a3   | 1.89 | 0.81 | 1.48 | 0.89 | 2.12 | 0.61 | 1.01 | 0.74 | Atp1a3   | ATP1A3   |
| IPI00121550.3 | Atp1b1   | 1.94 | 0.86 | 1.19 | 0.62 | 0.87 | 0.56 | 1.49 | 0.60 | Atp1b1   | ATP1B1   |
| IPI00556827.1 | Atp2b1   | 1.58 | 0.85 |      |      | 0.75 | 0.59 | 1.58 | 0.78 | Atp2b1   |          |
| IPI00776035.1 | Atp2b3   | 2.31 | -    |      |      |      | 0.45 | 0.40 | 0.03 | Atp2b3   |          |
| IPI00130280.1 | Atp5a1   | 1.51 | 1.08 |      |      | 0.77 | 0.84 | 1.14 | 0.77 | Atp5a1   | ATP5A1   |
| IPI00468481.2 | Atp5b    | 1.47 | 1.08 | 0.78 | 0.76 | 0.88 | 1.17 | 1.03 | 0.69 | Atp5b    | ATP5B    |
| IPI00776084.1 | Atp5c1   | 1.26 | -    |      |      | 0.72 | 0.70 | 0.95 | 0.83 | Atp5c1   |          |
| IPI00750074.1 | Atp5c1   | 1.33 | 1.08 |      |      | 0.72 | 0.70 | 0.95 | 0.83 | Atp5c1   |          |
| IPI00313475.1 | Atp5c1   | 1.35 | -    |      |      | 0.72 | 0.70 | 0.95 | 0.83 | Atp5c1   |          |
| IPI00228526.3 | Atp6v0a1 | 1.93 | 0.90 |      |      | 1.15 | 0.53 | 1.08 | 0.56 | Atp6v0a1 | ATP6V0A1 |
| IPI00228525.2 | Atp6v0a1 | 1.93 | -    |      |      | 1.15 | 0.53 | 1.08 | 0.56 | Atp6v0a1 | ATP6V0A1 |
| IPI00313841.1 | Atp6v0d1 | 1.82 | 0.94 |      |      | 0.98 | 1.97 | 0.94 | 0.81 | Atp6v0d1 | ATP6V0D1 |
| IPI00407692.3 | Atp6v1a  | 2.06 | 0.91 | 1.26 | 0.73 | 0.56 | 0.71 | 0.98 | 0.77 | Atp6v1a  |          |
| IPI00119113.3 | Atp6v1b2 | 1.90 | 0.88 | 1.35 | 1.09 | 0.98 | 0.66 | 0.79 | 1.05 | Atp6v1b2 | ATP6V1B2 |
| IPI00130186.4 | Atp6v1c1 | 2.24 | 0.91 |      |      |      | 0.98 | 1.11 | 0.48 | Atp6v1c1 |          |
| IPI00118787.1 | Atp6v1d  | 1.96 | 0.92 | 0.60 | 0.49 |      | 0.63 | 1.14 | 0.90 | Atp6v1d  |          |
| IPI00119115.2 | Atp6v1e1 | 2.02 | 0.87 | 1.57 | 0.59 | 0.35 | 1.27 | 1.00 | 0.79 | Atp6v1e1 |          |
| IPI00311461.1 | Atp6v1h  | 1.85 | 0.88 | 0.92 | 0.53 | 1.42 | 0.73 | 0.95 | 0.83 | Atp6v1h  |          |
| IPI00944706.1 | Bcas1    | 5.00 | 0.85 |      |      |      | 2.75 |      |      | Bcas1    |          |
| IPI00330860.2 | Bcas1    | 5.00 | -    |      |      |      | 2.75 |      |      | Bcas1    |          |
| IPI00890322.1 | Bdh1     | 1.52 | 1.14 |      |      | 0.65 | 0.83 | 1.27 | 0.64 | Bdh1     |          |
| IPI00330754.1 | Bdh1     | 1.53 | -    |      |      | 0.65 | 0.83 | 1.27 | 0.64 | Bdh1     |          |
| IPI00131896.1 | Brp44    | 1.73 | 0.89 |      |      | 1.47 |      |      |      | Brp44    |          |
| IPI00124292.1 | Brp44i   | 1.62 | -    |      |      |      |      |      |      | Brp44i   |          |
| IPI00918701.1 | Brp44i   | 1.81 | 0.73 |      |      |      |      |      |      | Brp44i   |          |
| IPI00461199.2 | Bsn      | 3.52 | 0.70 |      |      |      |      |      |      | Bsn      | BSN      |
| IPI00134093.4 | Bsn      | 3.57 | 0.75 |      |      |      |      |      |      | Bsn      | BSN      |
| IPI00119130.1 | Btbd17   | 3.07 | 1.08 |      |      |      |      |      |      | Btbd17   |          |
| IPI00788326.1 | Cacnb3   | 1.58 | 1.20 |      |      |      |      |      |      | Cacnb3   | CACNB3   |
| IPI00788347.1 | Cacnb3   | 1.58 | -    |      |      |      |      |      |      | Cacnb3   | CACNB3   |
| IPI00930809.1 | Cacng3   | 4.08 | 0.75 |      |      |      |      |      |      | Cacng3   |          |
| IPI00119346.1 | Calb2    | 1.49 | 1.04 |      |      |      |      | 0.98 | 0.42 | Calb2    |          |
| IPI00420725.4 | Camk2a   | 2.83 | -    | 1.35 | 0.37 | 1.93 | 0.64 | 1.29 | 0.78 | Camk2a   | CAMK2A   |
| IPI00621806.2 | Camk2a   | 3.00 | 0.75 | 1.35 | 0.37 | 1.93 | 0.64 | 1.29 | 0.78 | Camk2a   | CAMK2A   |
| IPI00858128.1 | Camk2d   | 2.00 | 0.64 | 2.20 | 0.48 | 1.29 | 0.60 | 0.76 | 0.80 | Camk2d   |          |

|                |               |      |      |      |      |      |      |      |      |               |        |
|----------------|---------------|------|------|------|------|------|------|------|------|---------------|--------|
| IPI00112584.3  | Camk2d        | 2.07 | -    | 2.20 | 0.48 | 1.29 | 0.60 | 0.76 | 0.80 | Camk2d        |        |
| IPI00406790.6  | Camk2d        | 2.07 | 0.90 | 2.20 | 0.48 | 1.29 | 0.60 | 0.76 | 0.80 | Camk2d        |        |
| IPI00828919.2  | Camk2d        | 2.14 | -    | 2.20 | 0.48 | 1.29 | 0.60 | 0.76 | 0.80 | Camk2d        |        |
| IPI00228044.1  | Camk2g        | 1.72 | 0.67 | 2.92 | 0.42 |      | 0.56 | 1.54 | 0.52 | Camk2g        |        |
| IPI00124695.1  | Camk2g        | 1.72 | 0.93 | 2.92 | 0.42 |      | 0.56 | 1.54 | 0.52 | Camk2g        |        |
| IPI00122486.3  | Camkv         | 1.29 | 0.75 | 0.69 |      | 0.89 | 0.55 | 1.55 | 1.42 | Camkv         |        |
| IPI00111265.3  | Capza2        | 1.29 | 0.95 | 0.58 | 0.49 | 0.74 | 0.55 | 1.10 | 0.70 | Capza2        |        |
| IPI00312058.5  | Cat           | 0.61 | -    | 1.20 | 1.25 | 1.26 | 1.33 |      |      | Cat           |        |
| IPI00869393.1  | Cat           | 0.64 | 0.93 | 1.20 | 1.25 | 1.26 | 1.33 |      |      | Cat           |        |
| IPI00116283.1  | Cct3          | 0.62 | 0.95 | 0.85 | 0.78 | 0.93 | 0.88 | 0.99 | 0.86 | Cct3          |        |
| IPI00116277.3  | Cct4          | 0.61 | 0.91 | 1.00 | 1.15 | 0.89 | 1.06 | 0.87 | 0.76 | Cct4          |        |
| IPI00116279.3  | Cct5          | 0.62 | 0.95 | 0.99 | 0.97 | 0.82 | 0.90 | 0.86 | 0.97 | Cct5          |        |
| IPI00116281.3  | Cct6a         | 0.62 | 0.85 | 1.06 | 0.50 | 0.80 | 0.34 | 0.91 | 0.70 | Cct6a         |        |
| IPI00331174.5  | Cct7          | 0.63 | 0.94 | 0.87 | 0.97 | 0.66 | 0.69 | 0.97 | 0.80 | Cct7          |        |
| IPI00469268.5  | Cct8          | 0.35 | 0.99 | 0.94 | 1.08 | 0.80 | 0.63 |      |      | Cct8          |        |
| IPI00775975.1  | Cdh13         | 1.31 | 0.83 |      |      | 0.54 |      |      |      | Cdh13         |        |
| IPI00122826.1  | Cend1         | 2.25 | 1.18 |      |      |      |      | 1.62 | 1.12 | Cend1         |        |
| IPI00136703.1  | Ckb           | 1.87 | 0.90 | 0.57 | 1.31 | 0.77 | 0.66 | 0.83 | 0.77 | Ckb           | CKB    |
| IPI00128296.1  | Ckmt1         | 2.31 | 1.08 |      |      |      | 0.60 | 1.37 | 0.71 | Ckmt1         |        |
| IPI00228978.2  | Cltb          | 2.82 | 1.01 | 0.61 | 0.84 | 0.63 |      | 0.76 | 1.25 | Cltb          |        |
| IPI00648173.1  | Cltc          | 1.47 | 0.91 | 1.13 | 0.83 | 0.88 | 0.85 | 0.96 | 0.78 | Cltc          | CLTC   |
| IPI00169916.11 | Cltc          | 1.53 | -    | 1.13 | 0.83 | 0.88 | 0.85 | 0.96 | 0.78 | Cltc          | CLTC   |
| IPI00474100.1  | Cnksr2        | 2.08 | 1.32 |      |      |      |      |      |      | Cnksr2        |        |
| IPI00319602.3  | Cnp           | 1.58 | 0.87 | 0.48 | 1.07 | 0.59 | 1.61 |      |      | Cnp           | CNP    |
| IPI00229598.4  | Cnp           | 1.63 | 0.78 | 0.48 | 1.07 | 0.59 | 1.61 |      |      | Cnp           | CNP    |
| IPI00131693.2  | Cntfr         | 1.28 | 0.90 |      |      |      |      |      |      | Cntfr         |        |
| IPI00123058.1  | Cntn1         | 1.32 | 0.93 |      | 0.60 | 1.00 | 0.57 | 1.58 | 0.59 | Cntn1         |        |
| IPI00323600.4  | Coro1a        | 1.61 | -    | 0.71 | 0.28 | 0.64 | 0.38 | 0.86 | 0.46 | Coro1a        |        |
| IPI00856886.1  | Coro1a        | 1.67 | 1.02 | 0.71 | 0.28 | 0.64 | 0.38 | 0.86 | 0.46 | Coro1a        |        |
| IPI00113141.1  | Cs            | 1.24 | 1.00 |      |      | 1.13 | 1.13 | 0.98 | 0.78 | Cs            |        |
| IPI00132728.2  | Cyc1          | 1.42 | 1.21 |      |      | 0.64 | 0.72 | 0.97 | 0.74 | Cyc1          |        |
| IPI00845772.1  | Cyc1          | 1.45 | 1.04 |      |      | 0.64 | 0.72 | 0.97 | 0.74 | Cyc1          |        |
| IPI00405625.9  | Cyfp2         | 1.40 | 0.89 |      |      | 1.19 |      |      |      | Cyfp2         | CYFIP2 |
| IPI00133284.1  | D10Jhu81e     | 2.05 | 1.01 |      |      | 0.52 | 0.33 |      |      | D10Jhu81e     |        |
| IPI00874461.1  | D430041D05Rik | 1.75 | 0.79 |      |      |      |      | 5.13 | 0.60 | D430041D05Rik |        |
| IPI00751337.3  | D430041D05Rik | 1.75 | -    |      |      |      |      | 5.13 | 0.60 | D430041D05Rik |        |
| IPI00387379.1  | Decr1         | 1.34 | 0.93 |      |      | 0.97 |      | 1.74 | 1.29 | Decr1         |        |
| IPI00816974.1  | Dgkb          | 3.39 | 0.97 |      |      |      |      |      |      | Dgkb          |        |
| IPI00421000.2  | Dgkb          | 3.39 | -    |      |      |      |      |      |      | Dgkb          |        |
| IPI00153660.4  | Dlat          | 1.41 | 1.13 |      |      | 0.88 | 0.81 | 1.08 | 0.90 | Dlat          |        |
| IPI00874456.1  | Dld           | 1.33 | 1.06 |      |      | 1.10 |      | 1.13 | 0.71 | Dld           |        |
| IPI00674640.1  | Dlg1          | 3.10 | 0.92 |      |      |      |      |      |      | Dlg1          |        |
| IPI00775854.1  | Dlg2          | 2.28 | 0.69 |      |      | 1.02 | 0.47 | 0.91 | 0.64 | Dlg2          | DLG2   |
| IPI00226727.4  | Dlg2          | 2.63 | 0.83 |      |      | 1.02 | 0.47 | 0.91 | 0.64 | Dlg2          | DLG2   |
| IPI00623890.1  | Dlg3          | 1.61 | 0.74 |      |      |      | 0.24 | 1.19 | 0.87 | Dlg3          |        |
| IPI00136350.3  | Dlg3          | 1.61 | -    |      |      |      | 0.24 | 1.19 | 0.87 | Dlg3          |        |
| IPI00753580.1  | Dlg3          | 1.61 | -    |      |      |      | 0.24 | 1.19 | 0.87 | Dlg3          |        |
| IPI00752220.1  | Dlgap4        | 1.74 | 0.72 |      |      |      |      | 0.71 | 0.87 | Dlgap4        | DLGAP4 |
| IPI00330186.3  | Dlgap4        | 1.74 | -    |      |      |      |      | 0.71 | 0.87 | Dlgap4        | DLGAP4 |

|               |          |      |      |      |      |         |      |      |      |          |        |
|---------------|----------|------|------|------|------|---------|------|------|------|----------|--------|
| IPI00134809.2 | Dist     | 1.37 | 1.20 |      |      | 1.01    |      | 1.03 | 0.69 | Dist     |        |
| IPI00890133.1 | Dnm1     | 2.86 | 0.88 | 0.32 |      | 0.63    | 0.32 | 1.64 | 0.54 | Dnm1     | DNM1   |
| IPI00465648.3 | Dnm1     | 2.86 | -    | 0.32 |      | 0.63    | 0.32 | 1.64 | 0.54 | Dnm1     | DNM1   |
| IPI00331293.3 | Dnm1     | 3.06 | 0.87 | 0.32 |      | 0.63    | 0.32 | 1.64 | 0.54 | Dnm1     | DNM1   |
| IPI00314883.4 | Dnm2     | 1.37 | -    |      |      | 1.76    |      | 0.63 | 0.93 | Dnm2     |        |
| IPI00131445.2 | Dnm2     | 1.37 | -    |      |      | 1.76    |      | 0.63 | 0.93 | Dnm2     |        |
| IPI00749677.3 | Dnm2     | 1.41 | 0.92 |      |      | 1.76    |      | 0.63 | 0.93 | Dnm2     |        |
| IPI00625738.3 | Dnm3     | 1.33 | 0.90 |      |      | 0.55    | 0.33 | 1.31 | 0.52 | Dnm3     |        |
| IPI00227432.7 | Dnm3     | 1.33 | -    |      |      | 0.55    | 0.33 | 1.31 | 0.52 | Dnm3     |        |
| IPI00624192.3 | Dpysl5   | 0.55 | 1.12 | 1.84 | 0.44 | 0.75    | 0.47 |      |      | Dpysl5   |        |
| IPI00110990.1 | Dusp3    | 2.13 | -    | 0.67 |      | 1.52    |      | 0.74 | 0.76 | Dusp3    |        |
| IPI00307837.6 | Eef1a1   | 0.54 | 1.05 | 0.83 |      | 0.94    | 1.06 | 1.04 | 0.82 | Eef1a1   |        |
| IPI00466069.3 | Eef2     | 0.62 | 1.12 | 1.20 |      | 0.80    | 0.87 | 0.82 | 0.89 | Eef2     | EEF2   |
| IPI00135677.2 | Ehd3     | 1.64 | 0.97 |      |      |         |      | 0.82 | 1.39 | Ehd3     |        |
| IPI00462072.3 | Eno1     | 1.68 | 0.91 | 0.67 |      | 0.87    | 0.95 | 0.67 |      | Eno1     |        |
| IPI00331704.7 | Eno2     | 2.83 | 0.90 | 0.60 |      | 0.49    | 0.76 | 0.91 | 0.78 | Eno2     |        |
| IPI00229295.1 | Epb4.1l3 | 1.63 | 0.88 |      |      |         | 0.83 | 0.92 |      | Epb4.1l3 |        |
| IPI00229294.1 | Epb4.1l3 | 1.63 | 0.95 |      |      |         | 0.83 | 0.92 |      | Epb4.1l3 |        |
| IPI00464296.5 | Epb4.1l3 | 1.63 | 0.97 |      |      |         | 0.83 | 0.92 |      | Epb4.1l3 |        |
| IPI00125501.1 | Epb4.1l3 | 1.70 | -    |      |      |         | 0.83 | 0.92 |      | Epb4.1l3 |        |
| IPI00460558.3 | Erc2     | 1.96 | 0.44 |      |      |         |      | 0.44 | 0.38 | Erc2     |        |
| IPI00420931.1 | Erc2     | 1.96 | -    |      |      |         |      | 0.44 | 0.38 | Erc2     |        |
| IPI00121322.2 | Etfdh    | 1.67 | 1.27 |      |      |         | 1.72 | 0.36 |      | Etfdh    |        |
| IPI00113223.2 | Fasn     | 0.47 | 0.85 | 1.00 |      | 1.07    | 0.88 | 0.81 | 1.00 | Fasn     | FASN   |
| IPI00117181.1 | Flot1    | 1.54 | 0.94 |      |      |         | 0.67 | 0.84 | 0.91 | Flot1    |        |
| IPI00124245.1 | G3bp2    | 0.63 | 1.14 | 1.31 |      | 0.36    | 0.90 | 0.97 | 1.33 | G3bp2    |        |
| IPI00115827.1 | Gbas     | 1.70 | -    |      |      |         | 1.23 | 0.62 | 0.69 | Gbas     |        |
| IPI00651782.2 | Gbas     | 1.72 | 1.05 |      |      |         | 1.23 | 0.62 | 0.69 | Gbas     |        |
| IPI00134137.1 | Gdap1    | 1.42 | 0.98 |      |      |         |      | 0.61 | 0.32 | Gdap1    |        |
| IPI00620728.2 | Gdap1l1  | 1.52 | 1.02 | 1.03 |      | 3.16    |      | 0.46 | 0.53 | Gdap1l1  |        |
| IPI00123756.1 | Gdap1l1  | 1.52 | -    | 1.03 |      | 3.16    |      | 0.46 | 0.53 | Gdap1l1  |        |
| IPI00380273.1 | Gja1     | 2.57 | 0.72 |      |      |         | 0.47 | 1.87 | 1.36 | Gja1     |        |
| IPI00114209.1 | Glud1    | 1.57 | 0.99 |      |      | 6.64    | 0.66 | 1.55 | 1.01 | Glud1    |        |
| IPI00626790.3 | Glul     | 2.64 | 0.93 | 1.57 |      | 0.81    |      | 0.72 | 1.73 | Glul     | GLUL   |
| IPI00227838.4 | Gng12    | 1.57 | 0.98 |      |      |         |      |      | 1.27 | Gng12    |        |
| IPI00117312.1 | Got2     | 1.55 | 0.96 |      |      |         | 1.24 | 0.56 | 1.14 | Got2     |        |
| IPI00122974.1 | Gpm6a    | 2.12 | 0.82 | 1.35 |      | 0.64    | 1.00 | 1.00 | 1.61 | Gpm6a    | GPM6A  |
| IPI00465871.1 | Gpr158   | 5.69 | 0.79 |      |      |         |      |      |      | Gpr158   | GPR158 |
| IPI00845711.1 | Gria2    | 1.46 | 0.77 |      |      |         |      | 2.20 | 1.44 | Gria2    |        |
| IPI00608015.1 | Gria2    | 1.46 | 0.94 |      |      |         |      | 2.20 | 1.44 | Gria2    |        |
| IPI00136967.2 | Gria2    | 1.46 | -    |      |      |         |      | 2.20 | 1.44 | Gria2    |        |
| IPI00470956.1 | Grm7     | 0.30 | 0.78 |      |      |         |      |      |      | Grm7     |        |
| IPI00223092.5 | Hadha    | 1.70 | 1.08 |      |      |         | 0.80 | 0.99 | 1.02 | Hadha    |        |
| IPI00115607.3 | Hadhb    | 2.13 | -    |      |      |         | 0.75 | 1.07 | 1.07 | Hadhb    |        |
| IPI00928559.1 | Hk1      | 1.75 | 1.11 | 0.32 |      | 2384.50 | 0.74 | 0.63 | 0.98 | Hk1      | HK1    |
| IPI00283611.1 | Hk1      | 1.75 | -    | 0.32 |      | 2384.50 | 0.74 | 0.63 | 0.98 | Hk1      | HK1    |
| IPI00759938.1 | Hk1      | 1.75 | -    | 0.32 |      | 2384.50 | 0.74 | 0.63 | 0.98 | Hk1      | HK1    |
| IPI00762858.1 | Hk1      | 1.80 | 1.07 | 0.32 |      | 2384.50 | 0.74 | 0.63 | 0.98 | Hk1      | HK1    |
| IPI00911164.1 | Hras1    | 1.26 | 0.91 | 0.99 |      |         |      | 0.80 | 0.66 | Hras1    |        |

|               |         |      |      |      |      |      |      |      |      |         |
|---------------|---------|------|------|------|------|------|------|------|------|---------|
| IPI00403929.4 | Hras1   | 1.26 | 1.00 | 0.99 |      |      | 0.80 | 0.66 | 0.22 | Hras1   |
| IPI00605942.2 | Hras1   | 1.26 | -    | 0.99 |      |      | 0.80 | 0.66 | 0.22 | Hras1   |
| IPI00129526.1 | Hsp90b1 | 0.80 | 1.09 | 0.69 | 0.56 | 0.81 | 0.68 |      |      | Hsp90b1 |
| IPI00279443.1 | Hspa12a | 1.47 | 0.94 |      |      |      |      |      |      | Hspa12a |
| IPI00880839.1 | Hspa9   | 1.24 | 1.02 |      |      | 0.77 | 1.30 | 0.89 | 1.02 | Hspa9   |
| IPI00133903.1 | Hspa9   | 1.24 | -    |      |      | 0.77 | 1.30 | 0.89 | 1.02 | Hspa9   |
| IPI00453499.3 | Iars2   | 1.38 | 1.05 |      |      |      | 0.42 | 0.80 | 0.73 | Iars2   |
| IPI00459725.2 | Idh3a   | 1.67 | 1.01 |      |      | 0.45 | 0.30 | 1.09 | 0.60 | Idh3a   |
| IPI00126635.1 | Idh3b   | 1.85 | 1.02 |      |      | 0.59 | 0.50 | 1.06 | 0.62 | Idh3b   |
| IPI00109169.1 | Idh3g   | 1.57 | 1.06 |      |      | 0.85 | 0.32 | 0.98 | 0.43 | Idh3g   |
| IPI00554845.2 | Immt    | 1.38 | 1.03 |      |      | 0.74 | 0.84 | 1.12 | 0.82 | Immt    |
| IPI00228150.1 | Immt    | 1.48 | -    |      |      | 0.74 | 0.84 | 1.12 | 0.82 | Immt    |
| IPI00381413.2 | Immt    | 1.60 | 1.01 |      |      | 0.74 | 0.84 | 1.12 | 0.82 | Immt    |
| IPI00381412.1 | Immt    | 1.60 | 1.03 |      |      | 0.74 | 0.84 | 1.12 | 0.82 | Immt    |
| IPI00762507.2 | Iqsec1  | 2.03 | 0.84 |      |      |      |      | 0.69 | 0.53 | Iqsec1  |
| IPI00761443.2 | Iqsec1  | 2.06 | -    |      |      |      |      | 0.69 | 0.53 | Iqsec1  |
| IPI00751369.1 | Ldha    | 1.38 | 0.94 | 1.09 | 1.10 | 0.60 | 0.71 | 0.85 | 0.92 | Ldha    |
| IPI00319994.6 | Ldha    | 1.38 | -    | 1.09 | 1.10 | 0.60 | 0.71 | 0.85 | 0.92 | Ldha    |
| IPI00229510.5 | Ldhb    | 2.45 | 0.94 | 0.70 | 1.23 | 0.62 | 0.73 | 1.08 | 0.70 | Ldhb    |
| IPI00131177.1 | Letm1   | 1.44 | 1.04 |      |      | 0.85 | 0.54 | 1.33 | 0.45 | Letm1   |
| IPI00120302.1 | Lgi1    | 2.21 | 0.81 |      |      |      |      |      |      | Lgi1    |
| IPI00119063.2 | Lrp1    | 0.67 | 1.11 |      | 0.88 | 0.99 | 1.48 | 1.03 | 0.92 | Lrp1    |
| IPI00123281.1 | Lrrc59  | 0.75 | -    |      |      | 0.36 | 0.69 |      |      | Lrrc59  |
| IPI00653744.1 | Lrrc59  | 0.76 | 1.09 |      |      | 0.36 | 0.69 |      |      | Lrrc59  |
| IPI00652675.2 | Lsamp   | 1.65 | 0.81 |      |      | 0.66 | 0.58 | 3.02 | 1.07 | Lsamp   |
| IPI00222833.1 | Lsamp   | 1.65 | -    |      |      | 0.66 | 0.58 | 3.02 | 1.07 | Lsamp   |
| IPI00848566.1 | Macf1   | 0.62 | 0.84 | 0.71 | 0.65 | 0.93 | 0.86 | 0.87 | 0.88 | Macf1   |
| IPI00276515.4 | Mag     | 3.43 | 0.69 |      |      |      |      |      |      | Mag     |
| IPI00230151.1 | Mag     | 3.43 | 0.74 |      |      |      |      |      |      | Mag     |
| IPI00223377.1 | Mbp     | 1.25 | 0.94 | 4.77 |      | 0.83 | 0.24 |      |      | Mbp     |
| IPI00323592.2 | Mdh2    | 1.48 | 0.99 | 0.69 | 1.00 | 0.74 | 1.35 | 0.97 | 0.67 | Mdh2    |
| IPI00132002.1 | Mgst3   | 1.50 | 1.14 |      |      |      |      | 1.53 | 0.23 | Mgst3   |
| IPI00756238.2 | Mpp2    | 2.67 | 0.86 |      |      |      | 0.39 | 1.85 | 0.50 | Mpp2    |
| IPI00125147.4 | Mpp2    | 2.67 | -    |      |      |      | 0.39 | 1.85 | 0.50 | Mpp2    |
| IPI00676243.2 | Mtap1a  | 2.07 | 0.99 | 1.08 | 0.71 | 0.89 | 0.39 |      |      | Mtap1a  |
| IPI00408909.4 | Mtap1a  | 2.07 | -    | 1.08 | 0.71 | 0.89 | 0.39 |      |      | Mtap1a  |
| IPI00896700.1 | Mtap1b  | 0.28 | 0.97 | 2.19 | 0.44 | 0.87 | 0.53 |      |      | Mtap1b  |
| IPI00894724.1 | Mtap2   | 1.50 | 1.10 | 1.61 | 0.54 | 0.83 | 0.79 |      |      | Mtap2   |
| IPI00118075.1 | Mtap2   | 1.56 | -    | 1.61 | 0.54 | 0.83 | 0.79 |      |      | Mtap2   |
| IPI00132039.2 | Mtch2   | 1.34 | 1.10 |      |      | 0.59 | 0.61 | 1.08 | 0.57 | Mtch2   |
| IPI00131176.1 | mt-Co2  | 1.61 | 0.97 |      |      | 0.63 | 0.25 |      |      | mt-Co2  |
| IPI00938432.1 | Mtx1    | 1.48 | 1.05 |      |      |      | 0.44 | 1.19 | 0.55 | Mtx1    |
| IPI00112327.2 | Mtx1    | 1.48 | -    |      |      |      | 0.44 | 1.19 | 0.55 | Mtx1    |
| IPI00886413.1 | Mtx1    | 1.56 | -    |      |      |      | 0.44 | 1.19 | 0.55 | Mtx1    |
| IPI00123181.4 | Myh9    | 1.49 | 1.06 | 0.60 | 0.80 | 0.94 | 0.49 | 0.57 | 1.14 | Myh9    |
| IPI00762700.2 | Myo6    | 1.51 | -    | 0.71 | 0.51 | 0.67 | 1.07 | 0.79 | 0.56 | Myo6    |
| IPI00623496.5 | Myo6    | 1.54 | 0.91 | 0.71 | 0.51 | 0.67 | 1.07 | 0.79 | 0.56 | Myo6    |
| IPI00462752.4 | Myo6    | 1.54 | -    | 0.71 | 0.51 | 0.67 | 1.07 | 0.79 | 0.56 | Myo6    |
| IPI00776145.1 | Myo6    | 1.60 | -    | 0.71 | 0.51 | 0.67 | 1.07 | 0.79 | 0.56 | Myo6    |





|               |         |      |      |      |      |      |      |      |      |         |        |
|---------------|---------|------|------|------|------|------|------|------|------|---------|--------|
| IPI00831080.1 | Pde10a  | 1.67 | -    |      |      |      |      |      |      | Pde10a  |        |
| IPI00762623.1 | Pde2a   | 1.84 | 0.92 |      |      | 0.62 | 2.58 | 4.07 |      | Pde2a   | PDE2A  |
| IPI00918129.1 | Pde2a   | 1.86 | 0.92 |      |      | 0.62 | 2.58 | 4.07 |      | Pde2a   | PDE2A  |
| IPI00337893.2 | Pdha1   | 1.56 | 1.10 |      |      | 1.03 | 1.18 | 0.99 | 0.84 | Pdha1   |        |
| IPI00132042.1 | Pdhb    | 1.46 | 1.06 | 0.44 |      | 0.71 | 0.74 | 0.94 | 0.48 | Pdhb    |        |
| IPI00222496.3 | Pdia6   | 0.56 | 1.04 | 0.42 | 0.53 | 0.77 | 0.89 | 1.22 | 0.85 | Pdia6   |        |
| IPI00387312.2 | Pfkl    | 1.44 | 0.81 | 0.77 | 1.38 |      | 0.15 | 0.73 | 0.66 | Pfkl    |        |
| IPI00331541.5 | Pfkm    | 1.92 | 0.83 | 0.81 | 0.98 | 1.34 | 1.14 | 1.07 | 0.80 | Pfkm    | PFKM   |
| IPI00927975.1 | Pfkp    | 4.52 | 0.88 | 0.59 | 0.87 |      |      | 0.74 | 0.72 | Pfkp    |        |
| IPI00124444.1 | Pfkp    | 4.52 | -    | 0.59 | 0.87 |      |      | 0.74 | 0.72 | Pfkp    |        |
| IPI00457898.3 | Pgam1   | 1.69 | 0.94 | 0.91 | 0.71 | 0.91 | 0.36 | 0.91 | 0.55 | Pgam1   |        |
| IPI00115875.8 | Pi4ka   | 2.13 | 0.80 |      |      | 0.04 |      | 0.91 | 0.44 | Pi4ka   | PI4KA  |
| IPI00757327.1 | Pkp4    | 1.75 | 0.68 |      |      |      |      | 1.74 | 0.55 | Pkp4    | PKP4   |
| IPI00473693.3 | Pkp4    | 1.81 | -    |      |      |      |      | 1.74 | 0.55 | Pkp4    | PKP4   |
| IPI00230061.2 | Plec    | 1.78 | 0.83 |      |      |      |      | 0.86 | 0.90 | Plec    | PLEC   |
| IPI00944107.1 | Plec    | 1.78 | -    |      |      |      |      | 0.86 | 0.90 | Plec    | PLEC   |
| IPI00400215.3 | Plec    | 1.78 | -    |      |      |      |      | 0.86 | 0.90 | Plec    | PLEC   |
| IPI00421268.1 | Plec    | 1.78 | -    |      |      |      |      | 0.86 | 0.90 | Plec    | PLEC   |
| IPI00400214.3 | Plec    | 1.78 | -    |      |      |      |      | 0.86 | 0.90 | Plec    | PLEC   |
| IPI00421267.1 | Plec    | 1.78 | -    |      |      |      |      | 0.86 | 0.90 | Plec    | PLEC   |
| IPI00626385.4 | Plec    | 1.78 | -    |      |      |      |      | 0.86 | 0.90 | Plec    | PLEC   |
| IPI00421271.1 | Plec    | 1.78 | -    |      |      |      |      | 0.86 | 0.90 | Plec    | PLEC   |
| IPI00625928.3 | Plec    | 1.78 | -    |      |      |      |      | 0.86 | 0.90 | Plec    | PLEC   |
| IPI00229509.3 | Plec    | 1.78 | -    |      |      |      |      | 0.86 | 0.90 | Plec    | PLEC   |
| IPI00468273.4 | Plec    | 1.78 | -    |      |      |      |      | 0.86 | 0.90 | Plec    | PLEC   |
| IPI00400209.1 | Plec    | 1.83 | -    |      |      |      |      | 0.86 | 0.90 | Plec    | PLEC   |
| IPI00115626.1 | Ppap2b  | 2.14 | 0.81 |      |      | 0.97 | 1.65 | 1.64 | 0.47 | Ppap2b  |        |
| IPI00121545.1 | Ppp3ca  | 2.36 | 0.94 | 1.06 | 0.61 | 1.05 | 0.54 | 0.81 | 0.58 | Ppp3ca  | PPP3CA |
| IPI00756703.1 | Ppp3ca  | 2.51 | -    | 1.06 | 0.61 | 1.05 | 0.54 | 0.81 | 0.58 | Ppp3ca  | PPP3CA |
| IPI00758024.1 | Prdx6   | 1.81 | 0.94 | 0.44 | 1.72 | 0.75 | 1.47 | 0.90 | 0.85 | Prdx6   |        |
| IPI00555059.2 | Prdx6   | 1.86 | -    | 0.44 | 1.72 | 0.75 | 1.47 | 0.90 | 0.85 | Prdx6   |        |
| IPI00875652.1 | Prkar1a | 1.78 | -    |      |      |      |      | 0.95 | 1.04 | Prkar1a |        |
| IPI00884460.1 | Prkca   | 2.14 | 0.95 |      |      | 0.55 | 0.48 | 0.83 | 0.67 | Prkca   |        |
| IPI00122069.1 | Prkcc   | 3.70 | 0.94 |      | 0.44 |      | 0.37 |      |      | Prkcc   |        |
| IPI00120793.1 | Prnp    | 2.19 | -    |      |      |      |      | 0.88 | 1.39 | Prnp    |        |
| IPI00462846.3 | Ptprd   | 1.40 | -    |      |      | 1.33 | 1.27 |      |      | Ptprd   | PTPRD  |
| IPI00462847.1 | Ptprd   | 1.41 | 0.94 |      |      | 1.33 | 1.27 |      |      | Ptprd   | PTPRD  |
| IPI00551337.1 | Ptprd   | 1.41 | -    |      |      | 1.33 | 1.27 |      |      | Ptprd   | PTPRD  |
| IPI00608063.3 | Ptprd   | 1.43 | -    |      |      | 1.33 | 1.27 |      |      | Ptprd   | PTPRD  |
| IPI00876285.1 | Ptprd   | 1.44 | -    |      |      | 1.33 | 1.27 |      |      | Ptprd   | PTPRD  |
| IPI00556869.1 | Ptprd   | 1.45 | 0.67 |      |      | 1.33 | 1.27 |      |      | Ptprd   | PTPRD  |
| IPI00465836.4 | Ptprd   | 1.45 | -    |      |      | 1.33 | 1.27 |      |      | Ptprd   | PTPRD  |
| IPI00875798.1 | Ptprd   | 1.46 | 0.95 |      |      | 1.33 | 1.27 |      |      | Ptprd   | PTPRD  |
| IPI00118447.1 | Pura    | 1.84 | 1.11 | 1.17 | 0.66 | 0.79 | 0.99 |      |      | Pura    |        |
| IPI00128867.3 | Purb    | 2.44 | 1.03 | 1.10 | 0.82 | 0.95 | 0.70 | 1.58 | 0.72 | Purb    |        |
| IPI00229796.3 | Pygb    | 1.31 | 0.80 | 0.50 | 0.70 | 0.84 | 0.39 | 1.34 | 0.73 | Pygb    |        |
| IPI00122965.1 | Rab3a   | 2.37 | 0.92 |      |      |      |      | 1.35 | 0.60 | Rab3a   |        |
| IPI00761613.1 | Rac1    | 1.37 | 0.84 | 0.98 | 0.91 | 0.98 | 1.04 | 1.14 | 0.79 | Rac1    |        |
| IPI00127408.3 | Rac1    | 1.39 | -    | 0.98 | 0.91 | 0.98 | 1.04 | 1.14 | 0.79 | Rac1    |        |

|               |          |      |      |      |      |      |        |      |          |         |
|---------------|----------|------|------|------|------|------|--------|------|----------|---------|
| IPI00396701.3 | Rap2a    | 1.55 | 0.88 |      |      | 1.07 | 166.42 | 0.19 | Rap2a    |         |
| IPI00895295.1 | Rapgef2  | 1.68 | 0.85 |      |      |      | 2.68   | 0.67 | Rapgef2  | RAPGEF2 |
| IPI00853823.2 | Rapgef2  | 1.77 | -    |      |      |      | 2.68   | 0.67 | Rapgef2  | RAPGEF2 |
| IPI00265467.3 | Rgs6     | 1.95 | 1.10 |      |      |      | 1.13   | 0.22 | Rgs6     |         |
| IPI00222930.4 | Rhot1    | 1.27 | -    |      |      | 1.27 | 0.91   | 0.84 | Rhot1    |         |
| IPI00515349.1 | Rhot1    | 1.27 | -    |      |      | 1.27 | 0.91   | 0.84 | Rhot1    |         |
| IPI00123186.4 | Rhot1    | 1.35 | 1.13 |      |      | 1.27 | 0.91   | 0.84 | Rhot1    |         |
| IPI00553828.2 | Rims1    | 1.63 | -    |      |      |      |        |      | Rims1    |         |
| IPI00118692.6 | Rims1    | 1.63 | -    |      |      |      |        |      | Rims1    |         |
| IPI00553696.2 | Rims1    | 1.63 | -    |      |      |      |        |      | Rims1    |         |
| IPI00553549.2 | Rims1    | 1.63 | -    |      |      |      |        |      | Rims1    |         |
| IPI00136021.6 | Rims1    | 1.75 | 0.81 |      |      |      |        |      | Rims1    |         |
| IPI00111151.2 | Rph3a    | 2.43 | 0.90 |      |      |      |        |      | Rph3a    | RPH3A   |
| IPI00849927.1 | Rpl10a   | 0.72 | 1.17 | 1.16 | 0.56 | 0.70 |        |      | Rpl10a   |         |
| IPI00754992.1 | Rpn2     | 0.76 | 1.12 |      | 0.59 | 0.94 |        |      | Rpn2     |         |
| IPI00889811.1 | Rpn2     | 0.76 | -    |      | 0.59 | 0.94 |        |      | Rpn2     |         |
| IPI00475154.1 | Rpn2     | 0.76 | -    |      | 0.59 | 0.94 |        |      | Rpn2     |         |
| IPI00112448.1 | Rps10    | 0.64 | 1.10 | 1.46 | 0.57 | 0.64 | 1.00   | 0.97 | Rps10    |         |
| IPI00830211.1 | Rps10    | 0.64 | -    | 1.46 | 0.57 | 0.64 | 1.00   | 0.97 | Rps10    |         |
| IPI00125901.5 | Rps13    | 0.64 | -    |      |      |      |        |      | Rps13    |         |
| IPI00480414.2 | Rtn3     | 2.37 | 1.00 | 2.48 | 0.67 | 0.81 | 1.03   | 0.57 | Rtn3     | RTN3    |
| IPI00470981.2 | Rtn3     | 2.37 | -    | 2.48 | 0.67 | 0.81 | 1.03   | 0.57 | Rtn3     | RTN3    |
| IPI00469392.2 | Rtn4     | 0.54 | 1.02 | 1.35 | 0.62 | 0.76 | 1.08   | 0.78 | Rtn4     | RTN4    |
| IPI00338309.4 | Ryr2     | 1.58 | 0.93 |      |      |      |        |      | Ryr2     | RYR2    |
| IPI00845776.1 | Sept3    | 1.74 | 0.93 |      |      |      |        |      | Sept3    |         |
| IPI00416280.3 | Sept5    | 1.84 | -    |      |      |      |        |      | Sept5    |         |
| IPI00874440.1 | Sept7    | 1.65 | 0.86 | 0.47 |      |      |        |      | Sept7    |         |
| IPI00224626.3 | Sept7    | 1.72 | -    | 0.47 |      |      |        |      | Sept7    |         |
| IPI00751005.2 | Sept8    | 3.71 | 0.85 | 0.83 |      |      |        |      | Sept8    |         |
| IPI00875717.2 | Sept8    | 3.71 | -    | 0.83 |      |      |        |      | Sept8    |         |
| IPI00880314.1 | Sept8    | 3.71 | -    | 0.83 |      |      |        |      | Sept8    |         |
| IPI00331497.9 | Sept8    | 3.71 | -    | 0.83 |      |      |        |      | Sept8    |         |
| IPI00928138.1 | Sept8    | 3.71 | -    | 0.83 |      |      |        |      | Sept8    |         |
| IPI00126115.1 | Sfxn3    | 1.55 | 1.05 |      | 0.53 | 0.80 | 1.32   | 0.50 | Sfxn3    |         |
| IPI00221602.1 | Sfxn5    | 2.33 | 1.24 |      | 7.47 | 1.05 | 0.70   | 0.52 | Sfxn5    |         |
| IPI00283761.1 | Sfxn5    | 2.33 | 1.24 |      | 7.47 | 1.05 | 0.70   | 0.52 | Sfxn5    |         |
| IPI00875338.1 | Sgip1    | 1.49 | 0.76 |      |      |      | 1.61   | 1.55 | Sgip1    | SGIP1   |
| IPI00465788.4 | Sgip1    | 1.49 | -    |      |      |      | 1.61   | 1.55 | Sgip1    | SGIP1   |
| IPI00623241.3 | Sgip1    | 1.51 | 0.82 |      |      |      | 1.61   | 1.55 | Sgip1    | SGIP1   |
| IPI00221501.2 | Sh3bgrl2 | 2.65 | -    |      |      |      | 1.06   | 0.18 | Sh3bgrl2 |         |
| IPI00453689.1 | Sipa111  | 2.45 | 0.44 |      |      |      | 1.56   | 0.79 | Sipa111  | SIPA1L1 |
| IPI00453688.1 | Sipa111  | 2.45 | -    |      |      |      | 1.56   | 0.79 | Sipa111  | SIPA1L1 |
| IPI00877254.1 | Slc12a5  | 2.33 | 0.88 |      |      | 0.51 | 0.86   | 1.71 | Slc12a5  | SLC12A5 |
| IPI00465769.3 | Slc12a5  | 2.33 | -    |      |      | 0.51 | 0.86   | 1.71 | Slc12a5  | SLC12A5 |
| IPI00109153.6 | Slc17a7  | 2.91 | 0.89 |      |      |      |        |      | Slc17a7  | SLC17A7 |
| IPI00749872.1 | Slc1a2   | 4.67 | -    |      | 0.81 |      | 1.50   | 0.51 | Slc1a2   | SLC1A2  |
| IPI00230290.1 | Slc1a2   | 4.67 | -    |      | 0.81 |      | 1.50   | 0.51 | Slc1a2   | SLC1A2  |
| IPI00470184.2 | Slc1a2   | 4.92 | 0.87 |      | 0.81 |      | 1.50   | 0.51 | Slc1a2   | SLC1A2  |
| IPI00230289.1 | Slc1a2   | 4.92 | 1.00 |      | 0.81 |      | 1.50   | 0.51 | Slc1a2   | SLC1A2  |

|               |          |      |      |      |      |      |      |      |      |          |        |
|---------------|----------|------|------|------|------|------|------|------|------|----------|--------|
| IPI00875419.1 | Slc1a2   | 4.92 | -    |      |      | 0.81 |      | 1.50 | 0.51 | Slc1a2   | SLC1A2 |
| IPI00230754.5 | Slc25a11 | 1.63 | 1.09 |      |      | 1.19 | 0.21 | 2.29 | 1.31 | Slc25a11 |        |
| IPI00109275.1 | Slc25a22 | 2.18 | 1.13 |      |      | 1.16 | 0.35 | 0.71 | 0.76 | Slc25a22 |        |
| IPI00124771.1 | Slc25a3  | 1.82 | 1.23 |      |      | 0.76 | 0.74 | 0.99 | 0.90 | Slc25a3  |        |
| IPI00115564.5 | Slc25a4  | 1.53 | 1.09 | 0.96 |      | 1.37 | 1.06 | 1.22 | 1.01 | Slc25a4  |        |
| IPI00127841.3 | Slc25a5  | 1.47 | 1.07 |      |      | 1.06 | 0.83 | 0.99 | 1.05 | Slc25a5  |        |
| IPI00857092.1 | Slc4a4   | 2.27 | 0.81 |      |      | 0.96 | 0.77 | 0.85 | 0.66 | Slc4a4   | SLC4A4 |
| IPI00170310.1 | Slc8a2   | 2.18 | 0.89 |      |      |      | 1.79 | 0.42 | 0.62 | Slc8a2   | SLC8A2 |
| IPI00109109.1 | Sod2     | 1.85 | 0.95 |      |      | 0.86 | 0.34 | 0.79 | 0.78 | Sod2     |        |
| IPI00923680.1 | Sorbs2   | 1.86 | 1.04 |      |      |      |      | 0.59 | 1.64 | Sorbs2   | SORBS2 |
| IPI00673886.5 | Sorbs2   | 1.86 | -    |      |      |      |      | 0.59 | 1.64 | Sorbs2   | SORBS2 |
| IPI00889824.1 | Srcin1   | 1.88 | 0.68 |      |      |      |      | 0.65 | 0.52 | Srcin1   | SRCIN1 |
| IPI00890037.1 | Srcin1   | 1.93 | 0.86 |      |      |      |      | 0.65 | 0.52 | Srcin1   | SRCIN1 |
| IPI00649708.1 | Srcin1   | 2.01 | 0.90 |      |      |      |      | 0.65 | 0.52 | Srcin1   | SRCIN1 |
| IPI00407158.2 | Srr      | 1.91 | 1.04 | 0.90 | 0.44 |      |      | 0.56 | 0.45 | Srr      |        |
| IPI00138217.2 | Srr      | 1.91 | -    | 0.90 | 0.44 |      |      | 0.56 | 0.45 | Srr      |        |
| IPI00113149.1 | Stx1b    | 1.39 | -    |      |      | 0.39 | 0.84 | 1.42 | 0.83 | Stx1b    |        |
| IPI00261627.1 | Sucla2   | 1.63 | 0.95 |      |      |      |      | 0.56 | 0.81 | Sucla2   |        |
| IPI00406442.3 | Suclg1   | 1.51 | 0.97 | 3.03 |      | 0.32 | 0.77 | 1.31 | 1.30 | Suclg1   |        |
| IPI00465810.3 | Sv2a     | 2.06 | 0.86 | 1.88 |      |      | 0.47 | 0.76 | 0.92 | Sv2a     | SV2A   |
| IPI00881540.3 | Synj1    | 2.03 | 0.89 |      | 0.27 |      | 0.42 | 1.62 | 2.23 | Synj1    | SYNJ1  |
| IPI00850983.3 | Synj1    | 2.03 | -    |      | 0.27 |      | 0.42 | 1.62 | 2.23 | Synj1    | SYNJ1  |
| IPI00662157.3 | Synpo    | 3.89 | 0.93 |      |      |      |      | 0.60 | 0.95 | Synpo    | SYNPO  |
| IPI00850112.1 | Synpo    | 3.89 | -    |      |      |      |      | 0.60 | 0.95 | Synpo    | SYNPO  |
| IPI00415558.1 | Synpo    | 4.00 | 0.97 |      |      |      |      | 0.60 | 0.95 | Synpo    | SYNPO  |
| IPI00123505.2 | Syp      | 2.64 | 0.66 | 4.94 | 0.46 | 2.86 | 0.17 | 1.55 | 0.65 | Syp      |        |
| IPI00756139.1 | Syp      | 2.64 | 0.70 | 4.94 | 0.46 | 2.86 | 0.17 | 1.55 | 0.65 | Syp      |        |
| IPI00750142.1 | Syt1     | 2.70 | 0.83 |      |      | 0.99 | 0.59 | 0.67 | 0.53 | Syt1     | SYT1   |
| IPI00129618.1 | Syt1     | 2.70 | -    |      |      | 0.99 | 0.59 | 0.67 | 0.53 | Syt1     | SYT1   |
| IPI00129622.3 | Syt2     | 2.26 | 1.03 |      |      |      |      |      |      | Syt2     |        |
| IPI00109727.1 | Thy1     | 3.22 | 0.81 |      |      | 2.71 | 0.50 | 0.88 | 0.75 | Thy1     |        |
| IPI00137409.3 | Tkt      | 0.74 | 0.89 | 0.78 | 1.13 | 1.01 | 0.58 | 1.02 | 0.82 | Tkt      |        |
| IPI00929916.1 | Tnr      | 1.88 | 0.95 |      |      |      | 1.17 | 0.96 | 0.33 | Tnr      |        |
| IPI00227126.1 | Tnr      | 1.88 | -    |      |      |      | 1.17 | 0.96 | 0.33 | Tnr      |        |
| IPI00751137.1 | Tomm70a  | 1.66 | 1.03 |      |      | 0.67 | 0.86 | 1.20 | 0.66 | Tomm70a  |        |
| IPI00467833.6 | Tpi1     | 1.83 | 0.90 | 0.86 | 0.83 | 1.29 | 0.73 | 0.96 | 0.70 | Tpi1     |        |
| IPI00119067.3 | Tppp     | 3.80 | 0.92 |      |      | 0.76 |      | 0.61 | 0.49 | Tppp     | TPPP   |
| IPI00757517.1 | Ttc7b    | 3.50 | 0.63 |      |      | 0.71 |      | 1.19 | 0.34 | Ttc7b    | TTC7B  |
| IPI00113244.3 | Ttyh1    | 2.36 | -    |      |      |      |      | 1.70 |      | Ttyh1    | TTYH1  |
| IPI00623995.3 | Ttyh1    | 2.60 | -    |      |      |      |      | 1.70 |      | Ttyh1    | TTYH1  |
| IPI00110753.1 | Tuba1a   | 0.63 | 0.95 | 0.76 | 0.61 | 0.68 | 0.46 | 1.17 | 0.65 | Tuba1a   |        |
| IPI00169463.1 | Tubb2c   | 0.61 | 0.97 | 1.13 | 0.71 | 0.86 | 0.62 |      |      | Tubb2c   |        |
| IPI00122928.1 | Tubb6    | 0.59 | 0.88 | 1.72 | 0.62 |      |      | 0.90 | 0.89 | Tubb6    |        |
| IPI00653598.2 | Uqcrc1   | 1.44 | 1.04 |      |      | 0.91 | 0.82 | 1.06 | 0.87 | Uqcrc1   | UQCRC1 |
| IPI00119138.1 | Uqcrc2   | 1.44 | 1.05 |      |      | 0.85 | 1.08 | 0.93 | 0.54 | Uqcrc2   |        |
| IPI00624653.1 | Usmg5    | 1.68 | 1.17 |      |      | 0.74 | 0.75 | 2.79 | 0.58 | Usmg5    |        |
| IPI00880852.1 | Vamp2    | 1.88 | 1.01 | 2.60 | 0.90 | 1.55 | 0.37 | 1.02 | 0.74 | Vamp2    | VAMP2  |
| IPI00229703.6 | Vamp2    | 1.88 | -    | 2.60 | 0.90 | 1.55 | 0.37 | 1.02 | 0.74 | Vamp2    | VAMP2  |
| IPI00122549.1 | Vdac1    | 1.55 | 1.02 |      | 1.28 | 0.86 | 0.44 | 0.90 | 0.77 | Vdac1    |        |



|               |              |      |      |      |      |      |      |      |      |  |          |
|---------------|--------------|------|------|------|------|------|------|------|------|--|----------|
| IPI00817008.1 | Rgs7bp       | 3.15 | 0.77 |      |      |      |      |      |      |  | RGS7BP   |
| IPI00283600.2 | Slc25a23     | 1.90 | 1.18 |      |      |      |      | 0.56 | 1.11 |  | SLC25A23 |
| IPI00227928.3 | Slc6a1       | 1.93 | 0.77 |      |      | 0.50 |      |      |      |  | SLC6A1   |
| IPI00229554.5 | Slc6a17      | 2.74 | 0.97 |      |      |      |      |      |      |  | SLC6A17  |
| IPI00757808.1 | Snph         | 2.77 | 0.98 |      |      |      |      |      |      |  | SNPH     |
| IPI00608013.2 | Snph         | 2.77 | 1.03 |      |      |      |      |      |      |  | SNPH     |
| IPI00227035.2 | Snph         | 2.95 | 0.99 |      |      |      |      |      |      |  | SNPH     |
| IPI00221456.1 | Sv2b         | 3.24 | 0.98 |      |      |      |      |      |      |  | SV2B     |
| IPI00112251.1 | Tubb3        | 0.55 | 0.93 | 1.75 | 0.59 | 0.82 | 0.59 | 0.81 | 0.68 |  | TUBB3    |
| IPI00109073.5 | Tubb4        | 0.54 | 0.95 | 0.95 | 0.69 | 0.74 | 0.56 |      |      |  | TUBB4    |
| IPI00277874.4 | Stmn2        | 0.19 | -    | 4.53 | 0.57 | 1.12 |      | 1.13 | 0.72 |  |          |
| IPI00890167.1 | Stmn2        | 0.19 | -    | 4.53 | 0.57 | 1.12 |      | 1.13 | 0.72 |  |          |
| IPI00314755.5 | Hn1          | 0.22 | -    | 1.44 | 0.58 |      |      | 0.99 | 0.73 |  |          |
| IPI00406447.3 | Dpysl3       | 0.32 | 1.15 | 1.11 | 0.41 | 0.66 | 0.35 | 0.86 | 0.50 |  |          |
| IPI00122349.1 | Dpysl3       | 0.32 | 1.46 | 1.11 | 0.41 | 0.66 | 0.35 | 0.86 | 0.50 |  |          |
| IPI00881485.1 | Dpysl3       | 0.32 | -    | 1.11 | 0.41 | 0.66 | 0.35 | 0.86 | 0.50 |  |          |
| IPI00874939.1 | Slc35f1      | 0.33 | 1.27 |      |      |      |      |      |      |  |          |
| IPI00396670.3 | Slc35f1      | 0.33 | -    |      |      |      |      |      |      |  |          |
| IPI00831546.1 | Chl1         | 0.34 | 1.23 |      |      |      | 0.29 | 1.44 | 1.30 |  |          |
| IPI00134058.3 | Erp44        | 0.44 | 1.11 |      |      |      |      | 1.03 | 0.82 |  |          |
| IPI00134420.1 | Gdpc1        | 0.50 | 1.08 |      |      |      |      | 4.91 | 0.64 |  |          |
| IPI00125960.1 | Ndrp1        | 0.54 | 0.84 |      |      |      |      | 0.88 | 0.84 |  |          |
| IPI00943445.1 | lars         | 0.57 | 1.16 | 1.17 | 0.30 | 0.24 | 0.78 | 0.82 | 0.86 |  |          |
| IPI00225201.5 | lars         | 0.57 | -    | 1.17 | 0.30 | 0.24 | 0.78 | 0.82 | 0.86 |  |          |
| IPI00112555.3 | Gars         | 0.59 | 0.97 | 1.07 | 0.63 | 0.40 | 0.79 | 1.05 | 0.70 |  |          |
| IPI00228253.2 | Acat2        | 0.60 | 0.97 | 1.05 | 0.68 | 0.78 | 0.23 |      |      |  |          |
| IPI00458204.8 | Tubb2c-ps1   | 0.60 | -    | 1.23 | 0.71 | 0.86 | 0.62 |      |      |  |          |
| IPI00117352.1 | Tubb5        | 0.60 | 0.96 | 1.28 | 0.70 | 0.85 | 0.63 | 0.71 | 0.49 |  |          |
| IPI00117350.1 | Tuba4a       | 0.60 | 0.97 | 0.71 | 0.62 | 0.68 |      | 3.52 | 0.93 |  |          |
| IPI00117348.4 | Tuba1b       | 0.62 | 0.97 | 0.71 | 0.67 |      | 0.48 | 0.90 | 0.57 |  |          |
| IPI00109061.1 | Tubb2b       | 0.62 | 0.86 | 1.27 | 0.59 | 0.77 | 0.62 | 1.05 | 0.64 |  |          |
| IPI00911165.1 | Gspt1        | 0.63 | 0.96 | 1.72 | 0.88 | 0.73 | 0.60 |      |      |  |          |
| IPI00230355.2 | Gspt1        | 0.63 | -    | 1.72 | 0.88 | 0.73 | 0.60 |      |      |  |          |
| IPI00338039.1 | Tubb2a       | 0.63 | 0.92 | 1.28 | 0.62 | 0.77 | 0.62 | 0.58 | 0.74 |  |          |
| IPI00762525.2 | -            | 0.64 | 1.21 | 1.46 | 1.28 | 0.46 | 0.84 |      |      |  |          |
| IPI00403810.2 | Tuba1c       | 0.64 | 0.96 |      |      |      |      |      |      |  |          |
| IPI00751092.1 | Gm12270      | 0.64 | 0.94 |      |      |      |      |      |      |  |          |
| IPI00752044.1 | LOC100045241 | 0.65 | 0.69 |      |      |      |      |      |      |  |          |
| IPI00858243.1 | Fkbp4        | 0.67 | -    | 0.91 | 1.14 |      | 1.14 |      |      |  |          |
| IPI00230139.5 | Fkbp4        | 0.68 | 0.98 | 0.91 | 1.14 |      | 1.14 |      |      |  |          |
| IPI00831541.1 | Capn5        | 0.70 | 0.79 |      |      |      |      |      |      |  |          |
| IPI00114962.1 | Capn5        | 0.70 | -    |      |      |      |      |      |      |  |          |
| IPI00115650.4 | Cacybp       | 0.72 | 1.19 | 0.98 | 1.12 |      | 1.01 | 1.15 | 0.92 |  |          |
| IPI00323819.3 | Rps20        | 0.73 | 1.21 | 0.98 | 0.79 | 1.09 | 0.99 |      |      |  |          |
| IPI00828479.1 | Acox1        | 0.73 | 1.07 |      |      | 0.72 | 1.48 |      |      |  |          |
| IPI00121575.1 | Atg2         | 0.75 | 1.10 | 0.37 |      | 1.14 |      |      |      |  |          |
| IPI00653300.1 | Tm9sf2       | 0.75 | 1.19 |      |      | 0.85 | 0.44 | 1.01 | 1.15 |  |          |
| IPI00115787.1 | Tm9sf2       | 0.75 | -    |      |      | 0.85 | 0.44 | 1.01 | 1.15 |  |          |
| IPI00133522.1 | P4hb         | 0.76 | 1.06 | 0.62 | 1.25 | 0.67 | 0.43 |      |      |  |          |

|               |               |      |      |      |      |      |      |      |      |
|---------------|---------------|------|------|------|------|------|------|------|------|
| IPI00108125.4 | Eif5a         | 0.77 | 0.98 |      |      |      |      | 0.84 | 0.82 |
| IPI00851014.1 | Gm2223        | 0.77 | 0.99 |      |      |      |      |      |      |
| IPI00853793.1 | LOC100048746  | 0.77 | -    |      |      |      |      |      |      |
| IPI00230415.5 | Eif2s3x       | 0.77 | -    | 1.30 | 0.86 | 1.07 | 1.13 |      |      |
| IPI00114401.1 | Emd           | 0.78 | 1.24 |      |      |      | 0.95 | 1.36 | 0.90 |
| IPI00123639.1 | Calr          | 0.85 | 1.16 | 0.48 | 0.44 | 0.61 | 0.48 |      |      |
| IPI00230005.3 | Prkaca        | 1.21 | 0.98 | 1.03 | 0.74 | 0.68 | 0.93 |      |      |
| IPI00227900.1 | Prkaca        | 1.21 | -    | 1.03 | 0.74 | 0.68 | 0.93 |      |      |
| IPI00269408.1 | S-p47         | 1.21 | 1.02 |      |      |      |      |      |      |
| IPI00116753.4 | Etfa          | 1.27 | 0.98 |      |      | 0.74 | 1.46 | 1.03 | 0.67 |
| IPI00121378.2 | Alcam         | 1.29 | 0.92 |      |      | 0.71 | 0.74 | 0.87 | 0.59 |
| IPI00808243.1 | 4933407C03Rik | 1.30 | 0.80 |      |      |      |      |      |      |
| IPI00665002.4 | 4933407C03Rik | 1.30 | -    |      |      |      |      |      |      |
| IPI00315808.3 | Mrps36        | 1.32 | 1.06 |      |      |      | 0.30 | 0.61 | 0.68 |
| IPI00117087.1 | Cdc37         | 1.33 | 0.88 | 0.54 | 0.67 |      | 0.29 | 1.09 | 0.68 |
| IPI00133342.1 | Atp5l         | 1.34 | -    |      |      |      |      | 1.53 | 1.27 |
| IPI00230192.5 | G-o1          | 1.35 | 0.95 |      |      |      |      |      |      |
| IPI00886354.1 | 4933407C03Rik | 1.35 | -    |      |      |      |      |      |      |
| IPI00828469.1 | Lap3          | 1.35 | 0.93 | 0.95 | 0.37 | 0.90 | 0.25 | 0.73 | 0.74 |
| IPI00331436.4 | Lap3          | 1.35 | -    | 0.95 | 0.37 | 0.90 | 0.25 | 0.73 | 0.74 |
| IPI00230737.2 | Aqp4          | 1.36 | 0.96 |      |      |      |      | 1.67 | 0.48 |
| IPI00135626.2 | Aqp4          | 1.36 | -    |      |      |      |      | 1.67 | 0.48 |
| IPI00230738.2 | Aqp4          | 1.36 | -    |      |      |      |      | 1.67 | 0.48 |
| IPI00351472.1 | -             | 1.36 | -    | 1.46 | 1.28 | 0.46 | 0.84 |      |      |
| IPI00133706.1 | Rab1b         | 1.36 | 1.04 | 0.58 | 0.50 | 1.25 | 0.69 | 1.28 | 0.46 |
| IPI00116843.1 | mt-Nd4        | 1.36 | 1.02 |      |      |      |      |      |      |
| IPI00876323.1 | Gm10221       | 1.36 | 1.03 |      |      |      |      |      |      |
| IPI00165731.3 | Abhd12        | 1.37 | 1.07 |      |      | 0.61 |      | 2.17 | 1.04 |
| IPI00762114.3 | Abhd12        | 1.37 | -    |      |      | 0.61 |      | 2.17 | 1.04 |
| IPI00930882.1 | Slc3a2        | 1.37 | 0.93 | 0.66 | 0.33 | 1.72 | 0.76 | 0.66 | 1.18 |
| IPI00114641.3 | Slc3a2        | 1.37 | -    | 0.66 | 0.33 | 1.72 | 0.76 | 0.66 | 1.18 |
| IPI00649135.2 | Gstm1         | 1.38 | 0.68 | 0.61 | 1.62 | 0.75 | 1.19 |      |      |
| IPI00230212.5 | Gstm1         | 1.38 | 0.91 | 0.61 | 1.62 | 0.75 | 1.19 |      |      |
| IPI00759881.1 | Acad9         | 1.39 | 1.07 |      |      | 2.77 | 0.99 | 1.76 | 0.48 |
| IPI00331710.1 | Acad9         | 1.39 | -    |      |      | 2.77 | 0.99 | 1.76 | 0.48 |
| IPI00262198.6 | Mcart1        | 1.39 | 0.99 |      |      |      |      |      |      |
| IPI00955131.1 | Prdx5         | 1.39 | 0.94 | 0.80 | 1.26 | 0.91 | 1.13 | 0.96 | 0.81 |
| IPI00759940.2 | Fh1           | 1.39 | 1.05 |      |      |      | 0.47 |      |      |
| IPI00918862.1 | Pccb          | 1.41 | 1.06 |      |      | 0.98 | 0.27 | 0.74 | 0.66 |
| IPI00606510.1 | Pccb          | 1.41 | -    |      |      | 0.98 | 0.27 | 0.74 | 0.66 |
| IPI00468653.4 | Pccb          | 1.41 | -    |      |      | 0.98 | 0.27 | 0.74 | 0.66 |
| IPI00857780.1 | Cadm3         | 1.41 | 0.69 |      |      | 1.63 | 0.43 | 1.35 | 0.74 |
| IPI00118020.1 | Cadm3         | 1.41 | -    |      |      | 1.63 | 0.43 | 1.35 | 0.74 |
| IPI00319111.3 | Sdhc          | 1.41 | 1.13 |      |      |      |      | 1.29 | 1.08 |
| IPI00880613.1 | Ndufb10       | 1.41 | -    |      |      | 1.61 |      | 0.85 | 0.76 |
| IPI00230715.5 | Ndufa13       | 1.41 | 1.04 |      |      | 1.21 | 1.22 | 0.92 | 0.76 |
| IPI00111770.7 | Atp5k         | 1.42 | 1.21 |      |      |      | 1.07 |      |      |
| IPI00133240.1 | Uqcrcf1       | 1.42 | 1.07 |      |      | 1.07 | 0.36 | 0.81 | 0.59 |
| IPI00116896.1 | mt-Atp8       | 1.42 | 1.01 |      |      |      |      |      |      |

|               |              |      |      |      |      |      |      |      |      |
|---------------|--------------|------|------|------|------|------|------|------|------|
| IPI00845840.1 | Pkm2         | 1.43 | 0.87 | 0.92 | 0.99 | 0.97 | 0.74 |      |      |
| IPI00133215.3 | Ndufb7       | 1.43 | 0.94 |      |      | 0.75 | 0.77 | 0.94 | 0.36 |
| IPI00128346.1 | Cisd1        | 1.43 | 1.16 |      |      | 0.58 | 0.64 | 1.82 | 0.72 |
| IPI00776169.1 | Pdk1         | 1.44 | 1.03 |      |      |      |      | 4.10 | 1.21 |
| IPI00221407.3 | Pdk1         | 1.44 | -    |      |      |      |      | 4.10 | 1.21 |
| IPI00885316.1 | Crk          | 1.44 | -    | 1.23 | 0.94 |      | 0.24 |      |      |
| IPI00623553.1 | LOC100044492 | 1.44 | 1.03 |      |      |      |      |      |      |
| IPI00121288.5 | Ndufb10      | 1.44 | 1.04 |      |      | 1.61 |      | 0.85 | 0.76 |
| IPI00230507.5 | Atp5h        | 1.44 | -    |      |      | 0.47 | 0.49 |      |      |
| IPI00341550.1 | mt-Nd1       | 1.45 | 1.09 |      |      |      |      |      |      |
| IPI00284806.8 | Hprt         | 1.45 | 0.93 |      |      |      |      |      |      |
| IPI00869430.1 | Cap1         | 1.45 | 0.98 | 0.72 | 0.82 | 0.91 | 0.43 | 0.77 | 0.68 |
| IPI00137331.6 | Cap1         | 1.45 | -    | 0.72 | 0.82 | 0.91 | 0.43 | 0.77 | 0.68 |
| IPI00831347.1 | Htra2        | 1.45 | -    |      |      |      |      | 1.63 | 0.66 |
| IPI00649253.1 | Pgm2         | 1.45 | 0.11 |      |      |      |      |      |      |
| IPI00929850.1 | Pgm2         | 1.45 | 1.00 |      |      |      |      |      |      |
| IPI00555140.2 | Pgm2         | 1.45 | -    |      |      |      |      |      |      |
| IPI00828649.1 | D-jc11       | 1.46 | 1.04 |      |      |      |      |      |      |
| IPI00226466.6 | D-jc11       | 1.46 | -    |      |      |      |      |      |      |
| IPI00918079.1 | Ndufab1      | 1.46 | 1.06 |      |      | 0.83 | 1.25 | 0.74 | 1.49 |
| IPI00133006.1 | Ndufab1      | 1.46 | -    |      |      | 0.83 | 1.25 | 0.74 | 1.49 |
| IPI00918301.1 | Ndufab1      | 1.46 | -    |      |      | 0.83 | 1.25 | 0.74 | 1.49 |
| IPI00129928.2 | Fh1          | 1.47 | -    |      |      |      | 0.47 |      |      |
| IPI00816848.2 | Abcb7        | 1.47 | 1.00 |      |      |      |      | 1.64 | 0.29 |
| IPI00761646.3 | Abcb7        | 1.47 | -    |      |      |      |      | 1.64 | 0.29 |
| IPI00672663.2 | Abcb7        | 1.47 | -    |      |      |      |      | 1.64 | 0.29 |
| IPI00473688.1 | Sirt2        | 1.47 | 0.89 |      |      |      |      | 0.91 | 0.98 |
| IPI00110265.1 | Sirt2        | 1.47 | -    |      |      |      |      | 0.91 | 0.98 |
| IPI00453777.2 | Atp5d        | 1.47 | 1.07 |      |      |      |      | 1.25 | 1.05 |
| IPI00894588.1 | Acadl        | 1.48 | 0.97 |      |      | 0.89 | 0.94 | 0.91 | 0.90 |
| IPI00133403.1 | Ndufb3       | 1.48 | 1.04 |      |      |      |      | 0.37 | 0.23 |
| IPI00403174.2 | Slc25a25     | 1.48 | 1.10 |      |      |      |      | 0.54 | 0.92 |
| IPI00755086.1 | Slc25a25     | 1.48 | -    |      |      |      |      | 0.54 | 0.92 |
| IPI00118986.1 | Atp5o        | 1.48 | 1.09 |      |      | 0.76 | 1.17 |      |      |
| IPI00555000.2 | Uqcrb        | 1.49 | 1.14 |      |      | 0.68 | 0.49 | 1.19 | 0.56 |
| IPI00474157.4 | Tomm40       | 1.49 | 1.35 |      |      |      | 0.83 | 2.63 | 0.79 |
| IPI00132347.1 | Uqcrb        | 1.49 | -    |      |      | 0.68 | 0.49 | 1.19 | 0.56 |
| IPI00407130.4 | Pkm2         | 1.50 | 0.87 | 0.92 | 0.99 | 0.97 | 0.74 |      |      |
| IPI00340932.1 | mt-Co3       | 1.50 | 1.05 |      |      |      |      |      |      |
| IPI00131193.1 | mt-Co3       | 1.50 | -    |      |      |      |      |      |      |
| IPI00114380.1 | Gstm5        | 1.50 | 0.81 | 0.60 |      |      |      | 0.54 | 0.73 |
| IPI00132050.1 | Ndufc2       | 1.50 | 1.06 |      |      | 0.70 |      | 2.01 | 0.64 |
| IPI00856384.1 | Atp5j2       | 1.50 | 1.09 |      |      | 0.81 | 2.11 | 0.84 | 0.93 |
| IPI00119114.2 | Acadl        | 1.50 | -    |      |      | 0.89 | 0.94 | 0.91 | 0.90 |
| IPI00271986.6 | Atp5j2       | 1.50 | -    |      |      | 0.81 | 2.11 | 0.84 | 0.93 |
| IPI00110825.1 | Ndufc2       | 1.50 | -    |      |      |      |      | 2.01 | 0.64 |
| IPI00230165.1 | S-p91        | 1.50 | 0.92 |      |      |      |      |      |      |
| IPI00408269.4 | S-p91        | 1.50 | -    |      |      |      |      |      |      |
| IPI00122409.1 | S-p91        | 1.50 | -    |      |      |      |      |      |      |

|               |               |      |      |      |      |      |      |      |      |
|---------------|---------------|------|------|------|------|------|------|------|------|
| IPI00153792.1 | 2410015M20Rik | 1.51 | 0.98 |      |      |      |      |      |      |
| IPI00122865.1 | Scamp5        | 1.52 | 0.78 |      |      |      |      | 0.06 | 0.07 |
| IPI00310972.4 | Rap1gds1      | 1.52 | -    | 0.50 | 1.30 | 0.40 | 0.38 | 1.12 | 0.57 |
| IPI00649019.1 | Ndufs5        | 1.54 | 0.95 |      |      |      | 0.78 | 1.39 | 0.86 |
| IPI00895965.1 |               | 1.54 | 0.95 |      |      |      |      |      |      |
| IPI00117300.3 | Ndufs5        | 1.54 | -    |      |      |      | 0.78 | 1.39 | 0.86 |
| IPI00875497.1 | Crat          | 1.54 | 0.95 |      |      | 1.26 | 0.61 | 1.19 | 0.76 |
| IPI00113347.3 | Crat          | 1.54 | -    |      |      | 1.26 | 0.61 | 1.19 | 0.76 |
| IPI00265568.6 | Slc25a25      | 1.55 | 0.97 |      |      |      |      | 0.54 | 0.92 |
| IPI00749749.1 | Slc25a25      | 1.55 | -    |      |      |      |      | 0.54 | 0.92 |
| IPI00752950.1 | Slc25a25      | 1.55 | -    |      |      |      |      | 0.54 | 0.92 |
| IPI00875326.1 | Tomm40        | 1.55 | -    |      |      |      | 0.83 | 2.63 | 0.79 |
| IPI00114246.2 | Ndufb11       | 1.55 | 1.17 |      |      |      |      | 1.23 | 0.50 |
| IPI00761607.1 | Hdhd2         | 1.56 | 0.94 | 1.15 | 0.74 |      |      | 0.81 | 0.63 |
| IPI00117176.1 | Faah          | 1.56 | 0.98 |      |      |      |      | 0.21 | 0.48 |
| IPI00230351.1 | Sdha          | 1.56 | 1.07 |      |      | 0.79 | 0.97 | 1.00 | 0.94 |
| IPI00132390.5 | Ndufb4        | 1.56 | 1.18 |      |      |      |      |      |      |
| IPI00153381.1 | Uqcr10        | 1.56 | 0.98 |      |      |      |      | 1.77 | 0.71 |
| IPI00650037.2 | D-jc6         | 1.56 | 0.87 |      |      |      |      |      |      |
| IPI00330269.3 | D-jc6         | 1.56 | -    |      |      |      |      |      |      |
| IPI00762713.1 | D-jc6         | 1.56 | -    |      |      |      |      |      |      |
| IPI00341282.2 | Atp5f1        | 1.57 | 1.16 |      |      | 0.35 | 0.45 | 1.03 | 1.14 |
| IPI00222419.5 | Gm10053       | 1.57 | -    |      |      |      |      |      |      |
| IPI00114377.1 | Cox7a2        | 1.58 | 1.17 |      |      | 0.93 |      | 0.39 | 0.74 |
| IPI00128285.1 | Ndufv3        | 1.58 | 1.23 |      |      | 0.38 |      | 0.12 | 0.07 |
| IPI00461964.3 | Aldh6a1       | 1.58 | 1.03 |      |      | 1.31 | 0.57 | 1.00 | 0.60 |
| IPI00344004.3 | Ndufa12       | 1.58 | 1.00 |      |      | 0.77 | 0.72 | 1.08 | 0.39 |
| IPI00415517.1 | Mfn2          | 1.59 | 0.99 |      |      |      | 0.51 | 1.31 | 0.46 |
| IPI00132216.1 | Ndufa3        | 1.59 | 1.14 |      |      |      | 0.43 | 1.20 | 0.19 |
| IPI00816883.1 | LOC100044767  | 1.59 | 1.16 |      |      |      |      |      |      |
| IPI00894705.1 | Mfn2          | 1.59 | -    |      |      |      | 0.51 | 1.31 | 0.46 |
| IPI00312244.3 | Mfn2          | 1.59 | -    |      |      |      | 0.51 | 1.31 | 0.46 |
| IPI00894813.1 | Mfn2          | 1.59 | -    |      |      |      | 0.51 | 1.31 | 0.46 |
| IPI00128826.1 | Cacng8        | 1.59 | 0.85 |      |      |      | 0.82 |      |      |
| IPI00229008.2 | Ndufs4        | 1.59 | 1.03 |      |      | 0.80 | 0.66 | 1.14 | 0.93 |
| IPI00875863.1 | Rhot2         | 1.59 | 1.00 |      |      |      |      |      |      |
| IPI00473646.2 | Rhot2         | 1.59 | -    |      |      |      |      |      |      |
| IPI00850053.1 | LOC100045547  | 1.60 | 0.84 |      |      | 1.89 |      |      |      |
| IPI00132653.1 | Oxct1         | 1.60 | 1.15 |      | 0.70 | 0.62 | 0.62 | 1.01 | 0.71 |
| IPI00121443.1 | Cox6a1        | 1.60 | 0.97 |      |      | 0.45 | 0.25 | 0.46 | 0.82 |
| IPI00265239.1 | Gm10108       | 1.61 | 1.10 |      |      |      |      |      |      |
| IPI00848729.1 | LOC100047509  | 1.62 | 0.76 |      |      |      |      |      |      |
| IPI00225390.5 | Cox6b1        | 1.62 | 1.00 |      |      | 0.88 | 1.26 | 0.70 | 1.00 |
| IPI00128345.2 | Ndufs6        | 1.62 | 1.02 |      |      | 3.05 | 1.19 | 0.93 | 0.60 |
| IPI00120719.4 | Cox5a         | 1.62 | 1.02 |      |      | 1.34 | 1.02 | 0.99 | 0.97 |
| IPI00129516.1 | Uqcrh         | 1.62 | 1.14 |      |      | 0.83 | 1.19 | 1.63 | 1.10 |
| IPI00115544.1 | Gng4          | 1.62 | 0.94 |      |      | 1.08 |      | 0.07 | 4.77 |
| IPI00223216.5 | Tst           | 1.62 | 0.96 |      |      | 1.08 | 1.04 |      |      |
| IPI00785410.1 | Cox5b         | 1.63 | 1.00 |      |      |      |      | 1.55 | 0.77 |



|               |              |      |      |      |      |      |      |      |
|---------------|--------------|------|------|------|------|------|------|------|
| IPI00387430.1 | Ndufb8       | 1.63 | 1.05 |      | 0.44 |      | 0.98 | 0.44 |
| IPI00116154.2 | Cox5b        | 1.63 | -    |      |      |      | 1.55 | 0.77 |
| IPI00652758.1 | Tom1         | 1.63 | 0.74 |      |      | 0.49 | 0.80 | 1.16 |
| IPI00380814.1 | Tom1         | 1.63 | -    |      |      |      | 0.80 | 1.16 |
| IPI00111960.2 | Gaa          | 1.64 | 1.16 | 1.05 | 0.84 | 0.48 | 1.40 | 0.64 |
| IPI00132623.3 | Ndufb9       | 1.64 | 0.98 |      | 0.97 | 0.90 | 1.14 | 0.82 |
| IPI00112377.1 | Rdh14        | 1.64 | 1.04 |      |      |      | 0.86 | 0.36 |
| IPI00403586.3 | Nceh1        | 1.65 | 1.04 |      | 0.36 |      | 1.24 | 0.40 |
| IPI00757109.2 | Pcmt1        | 1.65 | -    | 0.71 | 0.48 | 0.75 | 1.41 | 0.99 |
| IPI00230418.5 | Vsnl1        | 1.65 | 0.86 |      | 0.60 |      | 1.69 | 0.56 |
| IPI00117978.1 | Cox4i1       | 1.65 | 1.06 |      | 0.53 | 0.48 | 0.70 | 0.49 |
| IPI00322150.8 | Thop1        | 1.66 | 0.73 | 0.98 | 0.82 |      | 1.05 | 0.54 |
| IPI00224210.5 | Uqcrq        | 1.66 | 1.15 |      |      | 0.92 | 0.69 | 0.64 |
| IPI00881347.1 | Hpca         | 1.66 | 0.76 |      |      |      |      |      |
| IPI00648753.1 | Hpca         | 1.66 | -    |      |      |      |      |      |
| IPI00338536.1 | Sdhb         | 1.67 | 1.09 |      | 1.31 | 0.47 | 0.98 | 0.60 |
| IPI00462008.5 | LOC100047352 | 1.67 | -    |      |      |      |      |      |
| IPI00315302.5 | Ndufa2       | 1.68 | 0.89 |      |      |      | 1.14 | 0.91 |
| IPI00881096.1 |              | 1.68 | 1.01 |      |      |      |      |      |
| IPI00109870.1 |              | 1.68 | -    |      |      |      |      |      |
| IPI00480558.4 | Pcmt1        | 1.68 | 0.93 | 0.71 | 0.48 | 0.75 | 1.41 | 0.99 |
| IPI00329913.9 | Pcmt1        | 1.68 | -    | 0.71 | 0.48 | 0.75 | 1.41 | 0.99 |
| IPI00555069.3 | Pgk1         | 1.68 | 0.90 | 0.72 | 1.54 | 0.81 | 0.94 | 0.92 |
| IPI00125460.1 | Atpj         | 1.68 | 1.06 |      | 1.21 |      |      |      |
| IPI00850337.1 | LOC100048117 | 1.68 | -    |      |      |      |      |      |
| IPI00850377.1 | Gm2451       | 1.68 | -    |      |      |      |      |      |
| IPI00807819.1 | LOC100044663 | 1.68 | -    |      |      |      |      |      |
| IPI00114279.1 | Slc1a3       | 1.69 | 0.86 |      | 1.08 | 0.89 | 1.07 | 0.80 |
| IPI00230310.5 | Hpca         | 1.69 | 0.95 |      |      |      |      |      |
| IPI00319970.1 | Cac-2d1      | 1.72 | 0.85 |      |      |      |      |      |
| IPI00608064.1 | Fech         | 1.72 | 1.13 |      |      | 1.00 | 1.27 | 0.76 |
| IPI00752685.2 | Gm8055       | 1.72 | -    |      |      |      |      |      |
| IPI00831652.1 | Tomm40l      | 1.73 | 1.20 |      |      |      |      |      |
| IPI00113043.1 | Tomm40l      | 1.73 | -    |      |      |      |      |      |
| IPI00355248.5 | mt-Co1       | 1.73 | 1.00 |      |      |      |      |      |
| IPI00928416.1 | Ndufv1       | 1.73 | 1.01 |      | 3.35 | 0.95 | 0.96 | 0.71 |
| IPI00130460.1 | Ndufv1       | 1.73 | 1.02 |      | 3.35 | 0.95 | 0.96 | 0.71 |
| IPI00122633.3 | Acsf2        | 1.73 | 1.00 |      | 0.39 | 0.76 | 1.69 | 0.65 |
| IPI00850457.1 | Cadm2        | 1.74 | 0.83 |      | 0.70 | 1.36 | 2.07 | 1.27 |
| IPI00850833.1 | Cadm2        | 1.74 | -    |      | 0.70 | 1.36 | 2.07 | 1.27 |
| IPI00453537.2 | Cadm2        | 1.74 | -    |      | 0.70 | 1.36 | 2.07 | 1.27 |
| IPI00874653.1 | Cadm2        | 1.74 | -    |      | 0.70 | 1.36 | 2.07 | 1.27 |
| IPI00853969.2 | LOC100044643 | 1.75 | -    |      |      |      |      |      |
| IPI00928125.1 | Me3          | 1.75 | 0.99 |      |      |      | 3.49 | 0.62 |
| IPI00876208.1 | Me3          | 1.75 | 1.04 |      |      |      | 3.49 | 0.62 |
| IPI00308976.1 | Me3          | 1.75 | -    |      |      |      | 3.49 | 0.62 |
| IPI00225533.1 | Necap1       | 1.76 | 0.94 |      | 0.33 |      | 0.79 | 0.28 |
| IPI00886222.1 | Ndufs6       | 1.77 | -    |      | 3.05 | 1.19 | 0.93 | 0.60 |
| IPI00405736.3 | Cd81         | 1.78 | 0.74 | 0.75 | 0.60 | 0.05 | 0.64 | 0.89 |

|               |              |      |      |      |      |      |      |       |      |
|---------------|--------------|------|------|------|------|------|------|-------|------|
| IPI00126085.1 | Cyp46a1      | 1.78 | 0.94 |      |      |      |      | 1.03  | 1.48 |
| IPI00310916.1 | Cd81         | 1.78 | -    | 0.75 | 0.60 | 0.80 | 0.05 | 0.64  | 0.89 |
| IPI00130376.1 | mt-Co1       | 1.78 | -    |      |      |      |      |       |      |
| IPI00856377.1 | Prkar1b      | 1.78 | -    |      |      |      |      |       |      |
| IPI00856616.1 | Prkar1b      | 1.78 | -    |      |      |      |      |       |      |
| IPI00658782.4 | LOC100044212 | 1.79 | 0.75 |      |      |      |      |       |      |
| IPI00624881.4 | Rogdi        | 1.81 | 0.88 |      |      |      |      | 3.85  | 1.31 |
| IPI00399812.3 | Rogdi        | 1.81 | -    |      |      |      |      | 3.85  | 1.31 |
| IPI00317074.3 | Slc25a10     | 1.81 | 1.47 |      |      |      |      | 2.06  | 0.88 |
| IPI00228343.4 | Fech         | 1.81 | 1.08 |      |      |      | 1.00 | 1.27  | 0.76 |
| IPI00403079.4 | Cd47         | 1.81 | 0.84 |      |      |      |      | 12.03 | 0.59 |
| IPI00875877.1 | Cd47         | 1.81 | -    |      |      |      |      | 12.03 | 0.59 |
| IPI00124830.3 | Cd47         | 1.81 | -    |      |      |      |      | 12.03 | 0.59 |
| IPI00311515.2 |              | 1.81 | 0.99 |      |      |      |      |       |      |
| IPI00462075.4 | Gm5507       | 1.82 | -    |      |      |      |      |       |      |
| IPI00474508.1 | -            | 1.83 | 0.87 | 1.46 | 1.28 | 0.46 | 0.84 |       |      |
| IPI00111255.1 | Cox7c        | 1.83 | 1.14 |      |      |      |      |       |      |
| IPI00122740.2 | MacroD1      | 1.83 | 1.12 |      |      |      |      | 0.27  | 0.39 |
| IPI00377681.2 | N28178       | 1.84 | -    |      |      |      | 0.17 |       |      |
| IPI00757181.1 | LOC100045958 | 1.84 | 0.96 |      |      |      |      |       |      |
| IPI00751607.1 | LOC100045958 | 1.84 | 1.08 |      |      |      |      |       |      |
| IPI00850740.1 | LOC100044138 | 1.84 | 1.00 |      |      |      |      |       |      |
| IPI00850539.1 | LOC100044138 | 1.84 | -    |      |      |      |      |       |      |
| IPI00134478.1 | Cox8a        | 1.84 | -    |      |      |      |      |       |      |
| IPI00848572.1 | LOC100048483 | 1.84 | -    |      |      |      |      |       |      |
| IPI00135324.2 | Slc12a2      | 1.85 | 0.79 |      |      | 0.38 | 1.14 | 0.54  | 0.90 |
| IPI00347814.2 | BC085271     | 1.86 | 1.00 |      |      |      |      |       |      |
| IPI00850678.1 | Gm9531       | 1.86 | -    |      |      |      |      |       |      |
| IPI00755843.1 | Set          | 1.86 | -    |      |      |      |      | 0.90  | 0.49 |
| IPI00410883.1 | Set          | 1.86 | -    |      |      |      |      | 0.90  | 0.49 |
| IPI00111560.3 | Set          | 1.86 | -    |      |      |      |      | 0.90  | 0.49 |
| IPI00754518.1 | Set          | 1.86 | -    |      |      |      |      | 0.90  | 0.49 |
| IPI00322033.7 | Tom1l2       | 1.87 | -    | 0.68 | 0.81 | 3.40 | 0.33 | 0.73  | 0.75 |
| IPI00648853.4 | Tom1l2       | 1.87 | -    | 0.68 | 0.81 | 3.40 | 0.33 | 0.73  | 0.75 |
| IPI00856972.2 | Prkar1b      | 1.87 | 0.99 |      |      |      |      |       |      |
| IPI00857789.1 | Prkar1b      | 1.87 | 1.10 |      |      |      |      |       |      |
| IPI00310841.4 | Prkar1b      | 1.87 | -    |      |      |      |      |       |      |
| IPI00719901.2 | Prosc        | 1.87 | -    |      |      |      |      | 0.81  | 0.79 |
| IPI00923056.1 |              | 1.87 | 0.99 |      |      |      |      |       |      |
| IPI00121218.5 | Fahd2a       | 1.88 | 0.94 |      |      |      |      |       |      |
| IPI00318645.6 | Ndufa11      | 1.88 | 0.99 |      |      |      | 0.97 | 0.82  | 0.68 |
| IPI00850430.1 | LOC100046151 | 1.88 | 1.04 |      |      |      |      |       |      |
| IPI00133399.1 | Ndufa6       | 1.88 | 1.05 |      |      |      |      | 1.00  | 0.85 |
| IPI00647986.1 | LOC100044356 | 1.89 | 1.14 |      |      |      |      |       |      |
| IPI00409045.2 | Ensa         | 1.89 | 1.25 |      |      |      |      | 0.65  | 0.53 |
| IPI00230470.1 | Ensa         | 1.89 | -    |      |      |      |      | 0.65  | 0.53 |
| IPI00131666.1 | Slc1a6       | 1.89 | 0.71 |      |      |      |      |       |      |
| IPI00224993.4 | Gyk          | 1.89 | 1.17 |      |      |      |      |       |      |
| IPI00135446.1 | Gyk          | 1.89 | -    |      |      |      |      |       |      |

|                |              |      |      |      |      |      |      |      |      |
|----------------|--------------|------|------|------|------|------|------|------|------|
| IPI00654090.2  | Gyk          | 1.89 | -    |      |      |      |      |      |      |
| IPI00404687.5  | Gyk          | 1.89 | -    |      |      |      |      |      |      |
| IPI00464317.3  | Gls          | 1.89 | 0.93 |      |      | 1.45 | 0.24 | 0.62 | 0.87 |
| IPI00315999.4  | Atp6v1f      | 1.90 | 0.85 |      | 0.54 |      |      | 0.96 | 0.99 |
| IPI00130661.1  | Tpp1         | 1.91 | 0.78 | 0.43 | 1.40 |      | 0.30 | 0.79 | 0.95 |
| IPI00857195.1  | Itgav        | 1.92 | -    |      |      | 1.03 | 0.85 | 0.97 | 0.93 |
| IPI00120245.1  | Itgav        | 1.92 | -    |      |      | 1.03 | 0.85 | 0.97 | 0.93 |
| IPI00651878.1  | Ak3l1        | 1.92 | 0.94 |      |      |      |      |      |      |
| IPI00125035.1  | Ak3l1        | 1.92 | -    |      |      |      |      |      |      |
| IPI00648501.1  | Ak3l1        | 1.92 | -    |      |      |      |      |      |      |
| IPI00622837.1  | Gm6265       | 1.94 | 1.10 |      |      |      |      |      |      |
| IPI00131771.3  | Cox6c        | 1.94 | -    |      |      | 1.54 | 1.47 | 0.82 | 0.73 |
| IPI00409418.7  | Tom1l2       | 1.94 | 0.94 | 0.68 | 0.81 | 3.40 | 0.33 | 0.73 | 0.75 |
| IPI00621485.2  | Tom1l2       | 1.94 | -    | 0.68 | 0.81 | 3.40 | 0.33 | 0.73 | 0.75 |
| IPI00653921.2  | Rdx          | 1.99 | 1.03 | 0.47 | 1.76 | 0.59 | 1.09 | 1.26 | 0.65 |
| IPI00131614.1  | Sncb         | 2.00 | 1.03 |      |      |      |      | 0.35 | 0.75 |
| IPI00331110.3  | Sh3gl2       | 2.03 | -    |      | 1.09 |      | 0.65 | 1.34 | 0.64 |
| IPI00469987.3  | Gda          | 2.04 | 0.91 | 0.73 | 0.72 |      |      | 2.00 | 0.82 |
| IPI00756786.1  | Sh3glb2      | 2.04 | -    |      |      |      |      | 1.29 | 0.87 |
| IPI00648903.3  | AU040829     | 2.05 | 1.05 |      |      |      |      |      |      |
| IPI00128632.6  | AU040829     | 2.05 | -    |      |      |      |      |      |      |
| IPI00831188.1  | AU040829     | 2.05 | -    |      |      |      |      |      |      |
| IPI00170212.2  | Cox16        | 2.10 | 0.99 |      |      |      |      |      |      |
| IPI00930790.1  | Cox16        | 2.10 | -    |      |      |      |      |      |      |
| IPI00463495.2  | Synj2bp      | 2.10 | -    |      |      |      |      |      |      |
| IPI00654397.1  | Cox16        | 2.10 | -    |      |      |      |      |      |      |
| IPI00930820.1  | Synj2bp      | 2.10 | -    |      |      |      |      |      |      |
| IPI00930815.1  | Synj2bp      | 2.10 | -    |      |      |      |      |      |      |
| IPI00169647.2  | Sh3glb2      | 2.10 | 0.99 |      |      |      |      | 1.29 | 0.87 |
| IPI00626834.2  | Sh3glb2      | 2.10 | 1.15 |      |      |      |      | 1.29 | 0.87 |
| IPI00153832.1  | Sh3glb2      | 2.10 | -    |      |      |      |      | 1.29 | 0.87 |
| IPI00828453.1  | Sh3glb2      | 2.10 | -    |      |      |      |      | 1.29 | 0.87 |
| IPI00654420.1  | Prosc        | 2.10 | 1.02 |      |      |      |      | 0.81 | 0.79 |
| IPI00131548.1  | Prosc        | 2.10 | -    |      |      |      |      | 0.81 | 0.79 |
| IPI00752884.1  | LOC100047616 | 2.12 | -    |      |      |      |      |      |      |
| IPI00762748.2  | Vps13a       | 2.12 | 0.84 |      |      |      |      | 0.86 | 0.61 |
| IPI00420394.4  | Vps13a       | 2.12 | 1.01 |      |      |      |      | 0.86 | 0.61 |
| IPI00895403.1  | Cac-1a       | 2.13 | 0.80 |      |      |      |      |      |      |
| IPI00474281.1  | Gm13910      | 2.13 | 1.13 |      |      |      |      |      |      |
| IPI00850941.1  | -            | 2.13 | -    | 1.46 | 1.28 | 0.46 | 0.84 |      |      |
| IPI00408646.5  | Cac-1a       | 2.13 | -    |      |      |      |      |      |      |
| IPI00170357.5  | Afg3l2       | 2.13 | 1.05 |      |      |      |      | 0.98 | 0.61 |
| IPI00648567.1  | Sh3gl2       | 2.13 | 0.91 |      | 1.09 |      | 0.65 | 1.34 | 0.64 |
| IPI00336324.11 | Mdh1         | 2.15 | 0.97 | 0.92 | 0.75 | 0.77 | 0.48 | 1.02 | 0.71 |
| IPI00817046.1  | Inpp5j       | 2.16 | 0.83 |      |      |      |      |      |      |
| IPI00123704.1  | Atp1b2       | 2.16 | 0.86 | 0.73 |      | 0.51 | 0.42 | 1.03 | 0.98 |
| IPI00228633.7  | Gpi1         | 2.18 | 0.95 | 0.87 | 0.91 | 0.80 | 0.94 |      |      |
| IPI00853761.1  | LOC100046684 | 2.18 | 1.03 |      |      |      |      |      |      |
| IPI00135977.3  | Clic4        | 2.19 | -    | 0.99 | 0.79 |      |      | 0.67 | 0.84 |

|                |              |      |      |      |      |      |      |      |      |
|----------------|--------------|------|------|------|------|------|------|------|------|
| IPI00875107.1  | Prnd         | 2.19 | 0.89 |      |      |      |      |      |      |
| IPI00109206.1  | Cox16        | 2.20 | -    |      |      |      |      |      |      |
| IPI00133034.3  | Hint2        | 2.21 | 1.02 |      | 0.62 | 0.80 | 1.53 | 0.53 |      |
| IPI00403723.3  | Arfgap1      | 2.23 | 1.10 |      |      |      | 0.74 | 0.31 |      |
| IPI00756529.1  | Arfgap1      | 2.23 | -    |      |      |      | 0.74 | 0.31 |      |
| IPI00387227.1  | Arfgap1      | 2.23 | -    |      |      |      | 0.74 | 0.31 |      |
| IPI00121534.11 | Car2         | 2.25 | 0.74 | 0.74 | 0.75 |      |      |      |      |
| IPI00473235.1  | Cacnb4       | 2.27 | 0.91 |      |      |      |      |      |      |
| IPI00131720.3  | Cacnb4       | 2.27 | -    |      |      |      |      |      |      |
| IPI00626660.3  | Cacnb4       | 2.27 | -    |      |      |      |      |      |      |
| IPI00849661.1  | LOC100046035 | 2.29 | -    |      |      |      |      |      |      |
| IPI00807733.1  | Arfgap1      | 2.30 | -    |      |      |      | 0.74 | 0.31 |      |
| IPI00652871.1  | Wfs1         | 2.32 | 0.85 |      |      |      |      |      |      |
| IPI00114833.1  | Wfs1         | 2.32 | -    |      |      |      |      |      |      |
| IPI00119124.2  | Fundc1       | 2.35 | 0.97 |      |      |      | 1.13 | 0.61 |      |
| IPI00849730.2  | Wipf3        | 2.43 | 0.84 |      |      |      |      |      |      |
| IPI00606892.5  | Wipf3        | 2.43 | -    |      |      |      |      |      |      |
| IPI00225389.1  | S-p25        | 2.44 | 0.90 |      |      |      |      |      |      |
| IPI00120342.6  | Slc17a6      | 2.44 | 0.85 |      |      |      |      |      |      |
| IPI00134191.3  | Slc2a3       | 2.45 | 0.92 |      |      |      | 3.75 | 1.12 |      |
| IPI00230204.7  | Got1         | 2.48 | -    | 1.62 | 0.69 | 0.37 | 0.85 | 1.35 | 0.39 |
| IPI00555072.1  | Stxbp5l      | 2.55 | 0.73 |      |      |      |      |      |      |
| IPI00309953.4  | Stxbp5l      | 2.55 | -    |      |      |      |      |      |      |
| IPI00555114.1  | Stxbp5l      | 2.55 | -    |      |      |      |      |      |      |
| IPI00656281.1  | Stxbp5l      | 2.55 | -    |      |      |      |      |      |      |
| IPI00125635.1  | S-p25        | 2.56 | 0.90 |      |      |      |      |      |      |
| IPI00648355.3  | Rftn2        | 2.57 | 0.97 |      |      |      | 1.13 | 1.12 |      |
| IPI00229775.1  | Rftn2        | 2.57 | -    |      |      |      | 1.13 | 1.12 |      |
| IPI00928106.1  | Kc-b2        | 2.57 | 0.60 |      |      |      |      |      |      |
| IPI00315359.1  | Kc-b2        | 2.57 | 0.83 |      |      |      |      |      |      |
| IPI00118900.1  | Pde1b        | 2.58 | 0.77 |      | 1.79 |      | 0.43 | 0.29 |      |
| IPI00876489.1  | Sirpa        | 2.60 | 0.88 | 0.30 | 0.79 |      | 1.39 | 0.77 |      |
| IPI00895346.1  | Atp6v1g2     | 2.62 | 0.89 |      | 0.33 |      | 0.85 | 0.20 |      |
| IPI00123817.1  | Atp6v1g2     | 2.62 | -    |      | 0.33 |      | 0.85 | 0.20 |      |
| IPI00831305.1  | Pcp4         | 2.63 | 0.87 | 5.46 | 9.38 |      |      |      |      |
| IPI00875040.1  | Pcp4         | 2.63 | -    | 5.46 | 9.38 |      |      |      |      |
| IPI00229996.5  | Pcp4         | 2.63 | -    | 5.46 | 9.38 |      |      |      |      |
| IPI00625441.3  | Tpd52        | 2.63 | 0.91 |      |      |      | 1.40 | 0.88 |      |
| IPI00622833.2  | Tpd52        | 2.63 | -    |      |      |      | 1.40 | 0.88 |      |
| IPI00221788.3  | Hpcal4       | 2.65 | 1.09 |      |      |      | 0.17 | 0.57 |      |
| IPI00133886.1  | Cuta         | 2.66 | -    |      |      |      | 0.89 | 1.05 |      |
| IPI00461933.2  | Cuta         | 2.66 | -    |      |      |      | 0.89 | 1.05 |      |
| IPI00117454.1  | Eps15        | 2.73 | 1.31 |      |      | 1.15 | 1.39 | 1.19 |      |
| IPI00130322.5  | Ndufa7       | 2.73 | 1.06 |      |      |      | 1.17 | 0.64 |      |
| IPI00226872.1  | Efh2         | 2.78 | 1.26 | 0.47 | 0.73 | 0.66 | 0.81 | 0.42 |      |
| IPI00112223.1  | Efh2         | 2.78 | -    | 0.47 | 0.73 | 0.66 | 0.81 | 0.42 |      |
| IPI00877205.1  | Got1         | 2.83 | 0.91 | 1.62 | 0.69 | 0.37 | 0.85 | 1.35 | 0.39 |
| IPI00162781.2  | Ahcyl1       | 2.87 | 0.87 | 0.37 | 1.19 | 1.43 | 0.61 | 1.05 | 0.77 |
| IPI00330289.3  | Epb4.1l2     | 2.96 | 0.96 |      |      | 0.92 | 1.91 |      |      |

|               |              |      |      |      |      |      |  |      |      |      |
|---------------|--------------|------|------|------|------|------|--|------|------|------|
| IPI00330290.1 | Epb4.1l2     | 2.96 | -    |      |      | 0.92 |  | 1.91 |      |      |
| IPI00402933.1 | Epb4.1l2     | 2.96 | -    |      |      | 0.92 |  | 1.91 |      |      |
| IPI00309481.1 | Epb4.1l2     | 2.96 | -    |      |      | 0.92 |  | 1.91 |      |      |
| IPI00403406.1 | Epb4.1l2     | 2.96 | -    |      |      | 0.92 |  | 1.91 |      |      |
| IPI00755057.1 | LOC677282    | 3.00 | 0.57 |      |      |      |  |      |      |      |
| IPI00672505.1 | LOC100047603 | 3.00 | 0.87 |      |      |      |  | 0.82 |      |      |
| IPI00331066.6 | Calb1        | 3.20 | 0.92 | 0.88 |      |      |  |      |      |      |
| IPI00308667.1 | Dynl13       | 3.32 | -    | 0.93 |      |      |  |      | 0.79 | 0.40 |
| IPI00227267.2 | Epb4.1l2     | 3.35 | -    |      |      | 0.92 |  | 1.91 |      |      |
| IPI00831055.2 | Hbb-b1       | 3.40 | 1.33 |      |      |      |  |      |      |      |
| IPI00845802.1 | Hba-a1       | 3.40 | 1.37 |      |      |      |  |      |      |      |
| IPI00110658.1 | Hba-a1       | 3.40 | -    |      |      |      |  |      |      |      |
| IPI00318522.3 | Gad2         | 3.42 | 0.94 | 3.01 |      |      |  | 0.48 | 0.93 | 0.62 |
| IPI00858047.1 | Mgll         | 3.71 | 1.08 |      |      |      |  | 1.09 | 0.59 | 1.69 |
| IPI00132874.4 | Mgll         | 3.71 | -    |      |      |      |  | 1.09 | 0.59 | 1.69 |
| IPI00953761.1 | Mgll         | 3.71 | -    |      |      |      |  | 1.09 | 0.59 | 1.69 |
| IPI00953776.1 | Mgll         | 3.71 | -    |      |      |      |  | 1.09 | 0.59 | 1.69 |
| IPI00109311.3 | Slc9a3r1     | 4.39 | 0.93 | 1.06 | 0.92 | 0.45 |  | 1.03 | 1.18 | 0.54 |
| IPI00877299.1 | Icam5        | 4.57 | 0.82 |      |      |      |  |      |      |      |
| IPI00119033.1 | Icam5        | 4.71 | -    |      |      |      |  |      |      |      |
| IPI00338983.3 | Cnt-p1       | 5.09 | -    |      |      |      |  |      |      |      |
| IPI00230185.5 | Gpd1         | 5.25 | 0.89 |      | 0.69 |      |  |      |      |      |
| IPI00854028.2 | Cnt-p1       | 5.27 | 0.85 |      |      |      |  |      |      |      |
